# Supplementary material for: Highly energetic N-cyano-substituted CL-20 analogues: challenging the stability limits of polynitro hexaazaisowurtzitanes
Source: Royal Society of Chemistry journal article supplement (doi:10.1039/d3dt04203k), 2024-01-01
Supplement: d3dt04203k1.pdf [file d3dt04203k1.pdf]

# *Dalton Transactions* 2024

## Electronic Supplementary Information (ESI)

### **“Highly energetic *N*-cyano-substituted CL-20 analogues: challenging the stability limits of polynitro hexaazaisowurtzitane”**

Vladimir V. Parakhin,<sup>\*a</sup> Galina V. Pokhvisneva,<sup>a</sup> Nina I. Shlykova,<sup>a</sup> Sergei V. Nikitin,<sup>a</sup> Aida I. Samigullina,<sup>a</sup> Gennady A. Smirnov,<sup>a</sup> Pavel B. Gordeev,<sup>a</sup> Tat'yana S. Kon'kova,<sup>b</sup> David B. Lempert<sup>c</sup> and A. N. Pivkina<sup>b</sup>

<sup>a</sup> N. D. Zelinsky Institute of Organic Chemistry Russian Academy of Sciences, Moscow, 119991, Russian Federation. E-mail: parakhin@ioc.ac.ru.

<sup>b</sup> N. N. Semenov Federal Research Center for Chemical Physics Russian Academy of Sciences, Moscow, 119991, Russian Federation.

<sup>c</sup> Federal Research Center of Problems of Chemical Physics and Medicinal Chemistry, Russian Academy of Sciences, Ac. Semenov avenue 1, Chernogolovka, Moscow Region, 142432, Russian Federation.

## Contents

|                                                                                                                                                       |         |
|-------------------------------------------------------------------------------------------------------------------------------------------------------|---------|
| Experimental Section                                                                                                                                  | S6–S14  |
| General methods                                                                                                                                       | S6–S8   |
| Synthesis of polynitro hexaazaisowurtzitanes <b>4</b> , <b>5</b> , <b>6</b> , <b>8</b> , <b>10</b> , <b>12</b> , <b>14</b> , <b>15</b> , <b>20–23</b> | S9–S17  |
| Spectra of polynitro hexaazaisowurtzitanes <b>4</b> , <b>5</b> , <b>6</b> , <b>8</b> , <b>10</b> , <b>12</b> , <b>14</b> , <b>15</b> , <b>20–23</b>   | S18–S93 |
| <sup>1</sup> H NMR (300.1 MHz, [D <sub>6</sub> ]acetone) spectrum of <b>4</b>                                                                         | S18     |
| <sup>1</sup> H NMR (300.1 MHz, [D <sub>6</sub> ]DMSO) spectrum of <b>4</b>                                                                            | S19     |
| <sup>13</sup> C NMR (75.5 MHz, [D <sub>6</sub> ]DMSO) spectrum of <b>4</b>                                                                            | S20     |
| <sup>14</sup> N NMR (21.7 MHz, [D <sub>6</sub> ]DMSO) spectrum of <b>4</b>                                                                            | S21     |
| IR (KBr) spectrum of <b>4</b>                                                                                                                         | S22     |
| HRMS (ESI) of <b>4</b>                                                                                                                                | S23     |
| <sup>1</sup> H NMR (600.13 MHz, [D <sub>6</sub> ]acetone) spectrum of <b>5</b>                                                                        | S24     |
| <sup>13</sup> C NMR (150.9 MHz, [D <sub>6</sub> ]acetone) spectrum of <b>5</b>                                                                        | S25     |
| { <sup>1</sup> H– <sup>13</sup> C} COSY NMR (600.13 MHz, [D <sub>6</sub> ]acetone) spectrum of <b>5</b>                                               | S26     |
| { <sup>1</sup> H– <sup>13</sup> C} HSQC NMR (600.13 MHz, [D <sub>6</sub> ]acetone) spectrum of <b>5</b>                                               | S27     |
| { <sup>1</sup> H– <sup>13</sup> C} HMBC NMR (600.13 MHz, [D <sub>6</sub> ]acetone) spectrum of <b>5</b>                                               | S28     |
| <sup>14</sup> N NMR (43.37 MHz, [D <sub>6</sub> ]acetone) spectrum of <b>5</b>                                                                        | S29     |
| <sup>15</sup> N [INVGATED] NMR (60.3 MHz, [D <sub>6</sub> ]acetone) spectrum of <b>5</b>                                                              | S30     |
| { <sup>1</sup> H– <sup>15</sup> N} HMBC NMR (600.13 MHz, [D <sub>6</sub> ]acetone) spectrum of <b>5</b>                                               | S31     |
| IR (KBr) spectrum of <b>5</b>                                                                                                                         | S32     |
| HRMS (ESI) of <b>5</b>                                                                                                                                | S33     |
| <sup>1</sup> H NMR (600.13 MHz, [D <sub>6</sub> ]acetone) spectrum of <b>6</b>                                                                        | S34     |
| <sup>13</sup> C NMR (150.9 MHz, [D <sub>6</sub> ]acetone) spectrum of <b>6</b>                                                                        | S35     |
| { <sup>1</sup> H– <sup>13</sup> C} HSQC NMR (600.13 MHz, [D <sub>6</sub> ]acetone) spectrum of <b>6</b>                                               | S36     |
| { <sup>1</sup> H– <sup>13</sup> C} HMBC NMR (600.13 MHz, [D <sub>6</sub> ]acetone) spectrum of <b>6</b>                                               | S37     |
| <sup>14</sup> N NMR (43.37 MHz, [D <sub>6</sub> ]acetone) spectrum of <b>6</b>                                                                        | S38     |

|                                                                                                          |            |
|----------------------------------------------------------------------------------------------------------|------------|
| <sup>15</sup> N [INVGATED] NMR (60.3 MHz, [D <sub>6</sub> ]acetone) spectrum of <b>6</b>                 | <b>S39</b> |
| IR (KBr) spectrum of <b>6</b>                                                                            | <b>S40</b> |
| <sup>1</sup> H NMR (300.1 MHz, [D <sub>6</sub> ]acetone) spectrum of <b>8</b>                            | <b>S41</b> |
| <sup>13</sup> C NMR (75.5 MHz, [D <sub>6</sub> ]acetone) spectrum of <b>8</b>                            | <b>S42</b> |
| <sup>14</sup> N NMR (21.7 MHz, [D <sub>6</sub> ]acetone) spectrum of <b>8</b>                            | <b>S43</b> |
| IR (KBr) spectrum of <b>8</b>                                                                            | <b>S44</b> |
| HRMS (ESI) of <b>8</b>                                                                                   | <b>S45</b> |
| <sup>1</sup> H NMR (300.1 MHz, [D <sub>6</sub> ]acetone) spectrum of <b>10</b>                           | <b>S46</b> |
| <sup>13</sup> C NMR (75.5 MHz, [D <sub>6</sub> ]acetone) spectrum of <b>10</b>                           | <b>S47</b> |
| <sup>14</sup> N NMR (21.7 MHz, [D <sub>6</sub> ]acetone) spectrum of <b>10</b>                           | <b>S48</b> |
| IR (KBr) spectrum of <b>10</b>                                                                           | <b>S49</b> |
| HRMS (ESI) of <b>10</b>                                                                                  | <b>S50</b> |
| <sup>1</sup> H NMR (300.1 MHz, [D <sub>6</sub> ]acetone) spectrum of <b>12</b>                           | <b>S51</b> |
| <sup>13</sup> C NMR (75.5 MHz, [D <sub>6</sub> ]acetone) spectrum of <b>12</b>                           | <b>S52</b> |
| <sup>14</sup> N NMR (21.7 MHz, [D <sub>6</sub> ]acetone) spectrum of <b>12</b>                           | <b>S53</b> |
| IR (KBr) spectrum of <b>12</b>                                                                           | <b>S54</b> |
| <sup>1</sup> H NMR (300.1 MHz, [D <sub>6</sub> ]acetone) spectrum of <b>14</b>                           | <b>S55</b> |
| <sup>13</sup> C NMR (75.5 MHz, [D <sub>6</sub> ]acetone) spectrum of <b>14</b>                           | <b>S56</b> |
| <sup>14</sup> N NMR (21.7 MHz, [D <sub>6</sub> ]acetone) spectrum of <b>14</b>                           | <b>S57</b> |
| IR (KBr) spectrum of <b>14</b>                                                                           | <b>S58</b> |
| HRMS (ESI) of <b>14</b>                                                                                  | <b>S59</b> |
| <sup>1</sup> H NMR (600.13 MHz, [D <sub>6</sub> ]acetone) spectrum of <b>15</b>                          | <b>S60</b> |
| <sup>13</sup> C NMR (150.9 MHz, [D <sub>6</sub> ]acetone) spectrum of <b>15</b>                          | <b>S61</b> |
| { <sup>1</sup> H– <sup>13</sup> C} HSQC NMR (600.13 MHz, [D <sub>6</sub> ]acetone) spectrum of <b>15</b> | <b>S62</b> |
| { <sup>1</sup> H– <sup>13</sup> C} HMBC NMR (600.13 MHz, [D <sub>6</sub> ]acetone) spectrum of <b>15</b> | <b>S63</b> |
| <sup>14</sup> N NMR (43.37 MHz, [D <sub>6</sub> ]acetone) spectrum of <b>15</b>                          | <b>S64</b> |

|                                                                                                          |            |
|----------------------------------------------------------------------------------------------------------|------------|
| <sup>15</sup> N [INVGATED] NMR (60.3 MHz, [D <sub>6</sub> ]acetone) spectrum of <b>15</b>                | <b>S65</b> |
| { <sup>1</sup> H– <sup>15</sup> N} HSQC NMR (600.13 MHz, [D <sub>6</sub> ]acetone) spectrum of <b>15</b> | <b>S66</b> |
| IR (KBr) spectrum of <b>15</b>                                                                           | <b>S67</b> |
| HRMS (ESI) of <b>15</b>                                                                                  | <b>S68</b> |
| <sup>1</sup> H NMR (300.1 MHz, [D <sub>6</sub> ]DMSO) spectrum of <b>20</b>                              | <b>S69</b> |
| <sup>13</sup> C NMR (75.5 MHz, [D <sub>6</sub> ]DMSO) spectrum of <b>20</b>                              | <b>S70</b> |
| <sup>14</sup> N NMR (21.7 MHz, [D <sub>6</sub> ]DMSO) spectrum of <b>20</b>                              | <b>S71</b> |
| IR (KBr) spectrum of <b>20</b>                                                                           | <b>S72</b> |
| <sup>1</sup> H NMR (600.13 MHz, [D <sub>6</sub> ]acetone) spectrum of <b>22</b>                          | <b>S73</b> |
| <sup>1</sup> H NMR (300.1 MHz, [D <sub>6</sub> ]DMSO) spectrum of <b>22</b>                              | <b>S74</b> |
| <sup>13</sup> C NMR (150.9 MHz, [D <sub>6</sub> ]acetone) spectrum of <b>22</b>                          | <b>S75</b> |
| { <sup>1</sup> H– <sup>13</sup> C} HSQC NMR (600.13 MHz, [D <sub>6</sub> ]acetone) spectrum of <b>22</b> | <b>S76</b> |
| { <sup>1</sup> H– <sup>13</sup> C} HMBC NMR (600.13 MHz, [D <sub>6</sub> ]acetone) spectrum of <b>22</b> | <b>S77</b> |
| <sup>14</sup> N NMR (43.37 MHz, [D <sub>6</sub> ]acetone) spectrum of <b>22</b>                          | <b>S78</b> |
| <sup>15</sup> N [INVGATED] NMR (60.3 MHz, [D <sub>6</sub> ]acetone) spectrum of <b>22</b>                | <b>S79</b> |
| IR (KBr) spectrum of <b>22</b>                                                                           | <b>S80</b> |
| <sup>1</sup> H NMR (300.1 MHz, [D <sub>6</sub> ]acetone) spectrum of <b>21</b>                           | <b>S81</b> |
| <sup>13</sup> C NMR (75.5 MHz, [D <sub>6</sub> ]acetone) spectrum of <b>21</b>                           | <b>S82</b> |
| <sup>14</sup> N NMR (21.7 MHz, [D <sub>6</sub> ]acetone) spectrum of <b>21</b>                           | <b>S83</b> |
| IR (KBr) spectrum of <b>21</b>                                                                           | <b>S84</b> |
| HRMS (ESI) of <b>21</b>                                                                                  | <b>S85</b> |
| <sup>1</sup> H NMR (300.1 MHz, [D <sub>6</sub> ]acetone) spectrum of <b>23</b>                           | <b>S86</b> |
| <sup>1</sup> H NMR (600.13 MHz, [D <sub>6</sub> ]DMSO) spectrum of <b>23</b>                             | <b>S87</b> |
| <sup>13</sup> C NMR (150.9 MHz, [D <sub>6</sub> ]DMSO) spectrum of <b>23</b>                             | <b>S88</b> |
| { <sup>1</sup> H– <sup>13</sup> C} HSQC NMR (600.13 MHz, [D <sub>6</sub> ]DMSO) spectrum of <b>23</b>    | <b>S89</b> |
| { <sup>1</sup> H– <sup>13</sup> C} HMBC NMR (600.13 MHz, [D <sub>6</sub> ]DMSO) spectrum of <b>23</b>    | <b>S90</b> |

|                                                                                                                                                                               |                 |
|-------------------------------------------------------------------------------------------------------------------------------------------------------------------------------|-----------------|
| <sup>14</sup> N NMR (43.37 MHz, [D <sub>6</sub> ]DMSO) spectrum of <b>23</b>                                                                                                  | <b>S91</b>      |
| <sup>15</sup> N [INVGATED] NMR (60.3 MHz, [D <sub>6</sub> ]DMSO) spectrum of <b>23</b>                                                                                        | <b>S92</b>      |
| IR (KBr) spectrum of <b>23</b>                                                                                                                                                | <b>S93</b>      |
| Analysis of spectral characteristics of polynitro hexaazaisowurtzitane <b>4, 5, 6, 8, 10, 12, 14, 15, 20–23</b>                                                               | <b>S94–S98</b>  |
| Table of assigned <sup>1</sup> H, <sup>13</sup> C{ <sup>1</sup> H}, <sup>14</sup> N NMR shifts [ppm] of 4-carbomoyl-2,6,8,12-tetranitroisowurtzitane <b>4, 10, 14, 20, 21</b> | <b>S94</b>      |
| Table of assigned <sup>1</sup> H, <sup>13</sup> C{ <sup>1</sup> H}, <sup>14</sup> N NMR shifts [ppm] of 4-cyano-2,6,8,12-tetranitroisowurtzitane <b>5, 6, 15, 22, 23</b>      | <b>S95</b>      |
| Table of assigned <sup>15</sup> N NMR shifts [ppm] of 4-cyano-2,6,8,12-tetranitroisowurtzitane <b>5, 6, 15, 22, 23</b>                                                        | <b>S96</b>      |
| Table of assigned IR vibrations [cm <sup>-1</sup> ] of polynitro hexaazaisowurtzitane <b>4, 5, 6, 8, 10, 12, 14, 15, 20–23</b> in KBr                                         | <b>S96</b>      |
| Table of assigned <sup>1</sup> H, <sup>13</sup> C{ <sup>1</sup> H}, <sup>14</sup> N NMR shifts [ppm] of 2,6,8,12-tetranitroisowurtzitane <b>8</b> and <b>12</b>               | <b>S97</b>      |
| Description of the spectra of 4- carbomoyl- and 4-cyano- hexaazaisowurtzitane <b>4, 10, 14, 20, 21</b> and <b>5, 6, 15, 22, 23</b>                                            | <b>S98</b>      |
| X-ray crystal structure determination of <b>5, 15, 22</b> and <b>23</b>                                                                                                       | <b>S99–S112</b> |
| Single crystal X-ray diffraction of cyano derivative of tetranitrohexaazaisowurtzitane <b>5</b>                                                                               | <b>S99</b>      |
| Single crystal X-ray diffraction of cyano derivative tetranitrohexaazaisowurtzitane containing 2,2,2-trinitroethyl moiety <b>15</b>                                           | <b>S103</b>     |
| Single crystal X-ray diffraction of cyano derivative of pentanitrohexaazaisowurtzitane <b>22</b>                                                                              | <b>S106</b>     |
| Single crystal X-ray diffraction of dicyano derivative tetranitrohexaazaisowurtzitane <b>23</b>                                                                               | <b>S110</b>     |
| Molecular electrostatic surface potentials (ESPs) for cyano derivatives <b>5, 15, 22, 23</b> and CL-20                                                                        | <b>S113–117</b> |
| Differential scanning calorimetric (DSC) and thermogravimetric (TG) analysis for cyano derivatives <b>5, 6, 15, 22, 23</b>                                                    | <b>S118–120</b> |
| Combustion calorimetry measurements of cyano derivatives of polynitro hexaazaisowurtzitane <b>5, 6, 15, 22, 23</b>                                                            | <b>S121–123</b> |
| High-temperature chemical equilibria thermodynamic calculations for cyano derivatives <b>5, 6, 15, 22, 23</b> and CL-20                                                       | <b>S124–126</b> |
| Explosive performance of cyano derivatives of polynitro hexaazaisowurtzitane <b>5, 6, 15, 22, 23</b>                                                                          | <b>S127</b>     |
| References                                                                                                                                                                    | <b>S128</b>     |

## Experimental Section

### *General methods*

Analytical thin-layer chromatography (TLC) was carried out on Silufol UV-254 silica gel and Merck 60 F254 silica gel aluminum sheets. Merck 60 (15–40  $\mu\text{m}$ ) silica gel was used for preparative column and thin-layer chromatography. Melting points were determined with a Boethius Kofler melting point apparatus (heat rate  $5\text{ }^{\circ}\text{C}\cdot\text{min}^{-1}$ ).  $^1\text{H}$ ,  $^{13}\text{C}$  and  $^{14}\text{N}$  NMR spectra of compounds **4**, **8**, **10**, **12**, **14**, **20**, **21** were recorded using a 300 MHz (Bruker AM300) nuclear magnetic resonance spectrometer operating at 300.1, 75.5 and 30.4, respectively.  $^1\text{H}$ ,  $^{13}\text{C}\{^1\text{H}\}$ ,  $^{14}\text{N}$  and  $^{15}\text{N}\{^1\text{H}\}$  NMR spectra of compounds **5**, **6**, **15**, **22**, **23** were recorded using a 600 MHz (Bruker AV600) nuclear magnetic resonance spectrometer operating at 600.13, 564.69, 150.9, 43.37 and 60.8 MHz, respectively. DMSO- $d_6$  and acetone- $d_6$  were employed as NMR solvent. Chemical shifts /in the  $^1\text{H}$ ,  $^{13}\text{C}$ ,  $^{19}\text{F}$ ,  $^{14}\text{N}$  and  $^{15}\text{N}$  spectra are reported in delta ( $\delta$ ) units, parts per million (ppm), relative to the internal standard  $\text{Me}_4\text{Si}$  (TMS) ( $^1\text{H}$ ,  $^{13}\text{C}$  – positive values correspond to downfield chemical shifts) and external standard  $\text{MeNO}_2$  ( $^{14}\text{N}$ ,  $^{15}\text{N}$  – negative values correspond to upfield shifts). The values of the spectral parameters  $J$  and  $\Delta\nu_{1/2}$  are given in Hz. The signals in the NMR spectra were assigned based on the values of a resonance peaks in similar compounds.<sup>8,27</sup> IR spectra were recorded on a Bruker ALPHA-T spectrometer in the range from 4000 to 400  $\text{cm}^{-1}$  (resolution 2  $\text{cm}^{-1}$ ) using KBr pellets. The IR spectral frequencies were assigned according to commonly observed values reported in the literature.<sup>28</sup> High-resolution mass spectra (HRMS) were recorded by electrospray ionization (ESI) with a Bruker micrOTOF II instrument. Elemental analyses were carried out on Perkin Elmer 2400 elemental analyzer. X-ray diffraction data were collected at 100K on a four-circle Rigaku Synergy S diffractometer equipped with a HyPix6000HE area-detector (kappa geometry, shutterless  $\omega$ -scan technique), using graphite monochromatized Cu  $K_{\alpha}$ -radiation ( $\lambda = 1.54184\text{ \AA}$ ). Electron microscopy characterization was performed using Hitachi Regulus8230 field-emission scanning electron microscope (FE-SEM). Target-oriented approach was utilized for the optimization of the analytic measurements.<sup>29</sup> Before measurements the sample was mounted on a 25 mm aluminum specimen stub, fixed by conductive carbon tape and coated with a 30 nm film of carbon. Images were acquired in secondary electron mode at a 4 kV accelerating voltage. Electrostatic potentials (ESP) of

the 0.001 electrons per bohr<sup>3</sup> isosurfaces for the electron density were computed on the basis of XRD results using quantum chemical calculations employing the GAUSSIAN 09 program package<sup>17</sup> and consist of the evaluation of the electron density and electrostatic potential of the optimized molecular structures for the gas phase using the DFT/B3LYP method at the 6-31G(d,p) level. The powders densities were measured at ~30 °C using a Micromeritics AccuPyc 1340 V2.01 helium pycnometer. Thermochemical measurements were carried out on a precision automatic combustion calorimeter with an isothermal coating specifically developed for combustion of energetic compounds.<sup>18</sup> Thermal behavior was studied with simultaneous thermal analysis STA 449 F1 Jupiter (Netzsch). A sample with a mass of ~1.5 mg was placed into capped aluminum crucibles with cracked lids and heated at a linear rate of 5 °C·min<sup>-1</sup> to 600 °C in argon flow under atmospheric pressure. Sensitivity toward impact and friction was measured on a BAM devices using STANAG<sup>22</sup> standards in sets of 30 experiments. Solvents were purified before use according to the standard procedures.<sup>30</sup> All other reagents were used without further purification. The starting materials were obtained according to previously reported procedures.<sup>12,15,8b</sup>

4-Trifluoroacetyl-2,6,8,12-tetranitrohexaazaisowurtzitane (**1**) was prepared according to method of *Bellamy et al.*<sup>12,15</sup> by di-*N*-trifluoroacetylation of 2,6,8,12-tetraacetylhexaazaisowurtzitane (TADA) with TFAA, followed by nitrolysis of the *N*-acetyl groups using HNO<sub>3</sub>/30% oleum and removal of the *N*-trifluoroacetyl protecting group with EtOH in ~90% total yield per three steps, dec. >185 °C, <sup>1</sup>H NMR (300.1 MHz, acetone-d<sub>6</sub>): δ 5.99 (brs, 1H, NH), 6.65 (s, 2H, CH), 7.29 (m, 1H, CH), 7.60 (m, 1H, CH), 7.85 (s, 2H, CH) ppm.

4-Methoxymethyl-2,6,8,10,12-tetranitro-2,4,6,8,10,12-hexaazaisowurtzitane (**11**) was obtained based on our method<sup>8b</sup> by *N*-chloromethylation of **1** with CH<sub>2</sub>O/HCl<sub>(g)</sub>, followed by methanolysis and deprotection amino the with group AcONa/EtOH in ~75% total yield per three steps, mp 180–182 °C (dec.). <sup>1</sup>H NMR (300.1 MHz, acetone-d<sub>6</sub>): δ 3.39 (s, 3 H, Me), 4.76 (s, 2 H, CH<sub>2</sub>), 5.50 (brs, 1 H, NH), 6.35 (d, *J*<sub>H,H</sub> = 8 Hz, 2 H, CH<sup>4,5</sup>), 6.47 (d, *J*<sub>H,H</sub> = 8 Hz, 2 H, CH<sup>2,3</sup>), 7.69 (s, 2 H, CH<sup>1,6</sup>) ppm.

2,6,8,10,12-Pentanitro-2,4,6,8,10,12-hexaazaisowurtzitane (**16**) was prepared according to previously reported procedures of *Bellamy et al.*<sup>12</sup> was prepared by mono-*N*-trifluoroacetylation of TADA with TFAA/TFA, followed by nitrolysis of the *N*-acetyl groups using HNO<sub>3</sub>/30% oleum and removal of the *N*-trifluoroacetyl protecting group by

solvolysis with EtOH in ~40% total yield per three steps, dec >165 °C; <sup>1</sup>H NMR (300.1 MHz, acetone-d<sub>6</sub>): δ 6.00 (broad s, 1H, NH), 6.70–6.73 (m, 2 H, 2 CH), 7.91 (s, 2 H, 2 CH), 7.97 (d, *J*<sub>H,H</sub> = 8 Hz, 2H, 2CH) ppm.

2,6,8,12-Tetranitro-2,4,6,8,10,12-hexaazaisowurtzitane (**17**) was obtained according to previously reported procedures of *Bellamy et al.*<sup>12,15</sup> by di-*N*-trifluoroacetylation of TADA with TFAA, followed by nitrolysis of the *N*-acetyl groups using HNO<sub>3</sub>/30% oleum and removal the *N*-trifluoroacetyl groups with AcONa/EtOH in ~50% total yield per three steps, dec >185 °C; <sup>1</sup>H NMR (300.1 MHz, acetone-d<sub>6</sub>): 5.44 ppm (s, 2 H, NH), 6.28 ppm (s, 4 H, 4 CH), 7.57 (s, 2 H, 2 CH) ppm.

All physicochemical parameters of starting materials are in agreement with the data given in the literature.

Used trichloroacetyl isocyanate was prepared according to the corresponding reported procedures.<sup>31</sup>

## Syntheses

**Caution!** Although there is no danger in treating these substances, manipulations with such high-energy materials must be carried out by using standard safety precautions. All compounds should be handled with extreme care.

### 4-Carbomoyl-2,6,8,12-tetranitro-2,4,6,8,10,12-hexaazaisowurtzitane (**4**).

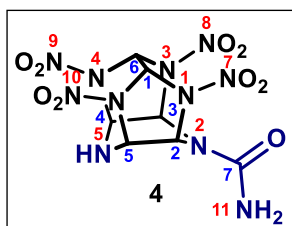

To a solution of **1** (0.500 g, 1.13 mmol) in dry acetonitrile (5 mL), a solution of trichloroacetyl isocyanate (1.30 g, 6.90 mmol) in dry acetonitrile (4 mL) was added dropwise. The reaction mixture was stirred at 20 °C for 24 h, and the solvent was removed *in vacuo*. To the residue, MeOH (7 mL) and 92% H<sub>2</sub>SO<sub>4</sub> (0.2 mL) was added, the resulting solution was stirred at 20 °C for 24 h, and the solvent was removed *in vacuo*. The residue was dissolved in ethyl acetate (15 mL), washed with distilled water (3x5 mL) to neutral pH of washings, followed by the solution drying over MgSO<sub>4</sub>, and the solvent was evaporated *in vacuo*. To the residue, a mixture of Et<sub>2</sub>O and hexane, 1:1 (2 mL), was added, the precipitate formed was filtered off and air-dried to give trifluoroacetyl derivative **3** (0.460 g, yield: 84%) as a colorless powder, which was directly used in the next step without further purification. To a solution of the resulting compound **3** (0.460 g, 0.945 mmol) in EtOH (4 mL), a solution of NaOAc (0.890 g, 10.9 mmol) in EtOH (8 mL) was added. The reaction mixture was stirred at 20 °C for 1 h, the precipitate formed was filtered off, washed with water (20 mL) and air-dried. Compound **4** (0.218 g, yield: 59% or 50% per two steps) was isolated as a colorless powder, dec. (observed on Kofler's table, 5 °C·min<sup>-1</sup>): 210 °C.

**<sup>1</sup>H NMR (300.1 MHz, acetone-d<sub>6</sub>):** δ 5.71 (br s, 1 H, NH), 6.32 (br s, 2 H, NH<sub>2</sub>), 6.42 (d, *J*<sub>H,H</sub> = 7 Hz, 2 H, CH<sup>4,5</sup>), 7.33 (d, *J*<sub>H,H</sub> = 8 Hz, 2 H, CH<sup>2,3</sup>), 7.68 (s, 2 H, CH<sup>1,6</sup>) ppm. **<sup>1</sup>H NMR (300.1 MHz, DMSO-d<sub>6</sub>):** δ 6.30 (br s, 1 H, NH), 7.10 (br s, 2 H, NH<sub>2</sub>), 6.16 (br s, 2 H, CH<sup>4,5</sup>), 6.93 (br s, 2 H, CH<sup>2,3</sup>), 7.65 (s, 2 H, CH<sup>1,6</sup>) ppm. **<sup>13</sup>C NMR (75.5 MHz, DMSO-d<sub>6</sub>):** δ 68.0 (CH<sup>2,3</sup>), 71.4 (CH<sup>4,5</sup>), 72.3 (CH<sup>1,6</sup>), 154.7 (C=O) ppm. **<sup>14</sup>N NMR (21.7 MHz, DMSO-d<sub>6</sub>):** δ -36 (Δ*v*<sub>1/2</sub> = 365 Hz) (4 NO<sub>2</sub>) ppm. **IR (KBr):** *ν*~ 3460 (m) and 3310 (m) (NH<sub>2</sub>), 3210 (m) (NH), 3044 (m) (CH), 1708 (s) (C=O), 1587 (vs) and 1548 (s) (*as* NNO<sub>2</sub>), 1324 (s), 1288 (vs) and 1265 (vs) (*sym* NNO<sub>2</sub>) cm<sup>-1</sup>. **HRMS (ESI):** *m/z* calcd for [C<sub>7</sub>H<sub>9</sub>N<sub>11</sub>O<sub>9</sub> + NH<sub>4</sub><sup>+</sup>]: 409.0923; found [*M* + NH<sub>4</sub>]<sup>+</sup>: 409.0922.

#### 4-Cyano-2,6,8,12-tetranitro-2,4,6,8,10,12-hexaazaisowurtzitane (**5**).

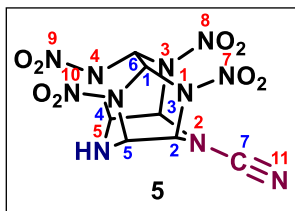

To a solution of  $(\text{CF}_3\text{SO}_2)_2\text{O}$  ( $\text{Tf}_2\text{O}$ ) (0.34 mL, 2.00 mmol) in dry acetonitrile (4 mL), pyridine (0.17 mL, 2.10 mmol) was added dropwise. The resulting mixture was stirred at 20 °C for 10 min and was added dropwise to a solution of **4** (0.200 g, 0.510 mmol) in dry acetonitrile (4 mL). The reaction mixture was stirred at 20 °C for 4.5 h until **4** disappeared by TLC (eluent, ethyl acetate–hexane, 1:1), then diluted with water (20 mL). The product was extracted with ethyl acetate (2×15 mL), the extract was washed with water (3×5 mL). After drying the extract over  $\text{MgSO}_4$ , and evaporating of the solvent *in vacuo*, compound **5** was isolated from the residue by flash column chromatography (elution with ethyl acetate). To the crude product,  $\text{Et}_2\text{O}$  (1 mL) was added, the precipitate formed was filtered off and air-dried. The resulting product can be further purified by recrystallisation from ethyl acetate in  $\text{CCl}_4$  vapor atmosphere. Compound **5** (0.169 g, yield: 88%) was obtained as a colorless powder, DSC (5 °C·min<sup>-1</sup>): onset 173 °C, max 210 °C. Density (pycnometer, 26 °C): 1.902 g·cm<sup>-3</sup>.

**<sup>1</sup>H NMR (600.13 MHz, acetone-*d*<sub>6</sub>):**  $\delta$  5.96 (br s, 1 H, NH), 6.56 (br s, 2 H, CH<sup>4,5</sup>), 6.88 (d,  $J_{\text{H,H}} = 7$  Hz, 2 H, CH<sup>2,3</sup>), 7.81 (s, 2 H, CH<sup>1,6</sup>) ppm. **<sup>13</sup>C{<sup>1</sup>H} NMR (150.9 MHz, acetone-*d*<sub>6</sub>):**  $\delta$  71.6 (CH<sup>4,5</sup>), 72.5 (CH<sup>2,3</sup>), 72.7 (CH<sup>1,6</sup>), 111.1 (CN) ppm. **<sup>14</sup>N NMR (43.37 MHz, acetone-*d*<sub>6</sub>):**  $\delta$  -40 ( $\Delta\nu_{1/2} = 72$  Hz) (2 N<sup>9,10</sup>O<sub>2</sub>), -38 ( $\Delta\nu_{1/2} = 75$  Hz) (2 N<sup>7,8</sup>O<sub>2</sub>) ppm. **<sup>15</sup>N{<sup>1</sup>H} NMR ([INVGATED], 60.8 MHz, acetone-*d*<sub>6</sub>):**  $\delta$  -336.3 (N<sup>2</sup>), -182.6 (N<sup>1,3</sup>), -177.6 (N<sup>4,5</sup>), -172.0 (CN<sup>11</sup>), -39.9, (N<sup>7,8</sup>), -37.1, (N<sup>9,10</sup>) ppm. **IR (KBr):**  $\nu$  3388 (m) (NH), 3038 (m) (CH), 2243 (s) (CN), 1595 (vs) and 1555 (s) (*as* NNO<sub>2</sub>), 1328 (vs), 1292 (vs) and 1269 (vs) (*sym* NNO<sub>2</sub>) cm<sup>-1</sup>. **HRMS (ESI):**  $m/z$  calcd for  $[\text{C}_7\text{H}_7\text{N}_{11}\text{O}_8 - \text{H}]^+$ : 372.0406; found  $[M - \text{H}]^+$ : 372.0398.

#### 4-Nitroso-2,6,8,12-tetranitro-2,4,6,8,10,12-hexaazaisowurtzitane (**8**).

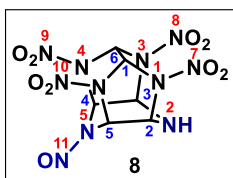

To a solution of **1** (0.50 g, 1.13 mmol) in AcOH (5 mL),  $\text{NaNO}_2$  (0.35 g, 5 mmol) was added portionwise. The reaction mixture was stirred at 20 °C for 4 h until **1** disappeared by TLC (eluent, ethyl acetate–hexane, 1:1) and then diluted with water (30 mL). The precipitate formed was filtered off, washed with water and air-dried to give trifluoroacetyl derivative **7** (0.450 g, yield: 85%) as a colorless powder, which was directly used in the next step without further purification. The resulting compound **7** (0.450 g, 0.85 mmol) was dissolved in EtOH (8 mL), the reaction mixture was stirred at 20 °C for 45 min, the precipitate formed was filtered off, washed with mixture of EtOH and water, 1:1 (4 mL), and air-dried. Compound **8** (0.311 g, yield: 87%) was isolated as a colorless powder, dec. (observed on Kofler's table, 5 °C·min<sup>-1</sup>): 190 °C.

**<sup>1</sup>H NMR (300.1 MHz, acetone-d<sub>6</sub>):** δ 5.92 (br s, 1 H, NH), 6.49 and 6.80 (2d,  $J_{\text{H,H}} = 8$  Hz, 2 H, CH<sup>2,3</sup>), 7.84 (dd,  $J_{\text{H,H1}} = 16$  Hz,  $J_{\text{H,H2}} = 2$  Hz, 2 H, CH<sup>4,5</sup>) and 7.96 (dd,  $J_{\text{H,H}} = 8$  Hz,  $J_{\text{H,H}} = 2$  Hz, 2 H, CH<sup>4,5</sup>), 7.85 (d,  $J_{\text{H,H}} = 6$  Hz, 2 H, CH<sup>1,6</sup>) ppm. **<sup>13</sup>C NMR (75.5 MHz, acetone-d<sub>6</sub>):** δ 68.0 (CH<sup>2,3</sup>), 71.4 (CH<sup>4,5</sup>), 72.3 (CH<sup>1,6</sup>), 154.7 (C=O) ppm. **<sup>14</sup>N NMR (21.7 MHz, acetone-d<sub>6</sub>):** δ −40 ( $\Delta\nu_{1/2} = 61$  Hz) (2 N<sup>7,8</sup>O<sub>2</sub>) and −37 ( $\Delta\nu_{1/2} = 59$  Hz) (2 N<sup>9,10</sup>O<sub>2</sub>) ppm. **IR (KBr):**  $\nu$ ~ 3466 (m) and 3401 (m) (NH), 3037 (m) (CH), 1604 (vs) and 1558 (vs) (*as* NNO<sub>2</sub>), 1330 (vs), 1289 (vs) and 1266 (vs) (*sym* NNO<sub>2</sub>) cm<sup>−1</sup>. **Elemental analysis** for C<sub>6</sub>H<sub>7</sub>N<sub>11</sub>O<sub>9</sub> (377.19): calcd C, 19.10; H, 1.86; N, 40.85 %; found C, 19.43; H, 1.99; N, 40.60 %.

#### 4-Carbomoyl-10-nitroso-2,6,8,12-tetranitro-2,4,6,8,10,12-hexaazaisowurtzitane (10).

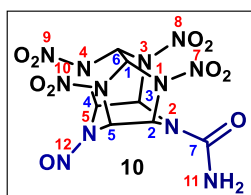

To a solution of **8** (0.440 g, 1.17 mmol) in dry acetonitrile (5 mL), a solution of trichloroacetyl isocyanate (1.50 g, 8.00 mmol) in dry acetonitrile (4 mL) was added dropwise. The reaction mixture was stirred at 20 °C for 24 h, and the solvent was removed *in vacuo*. To the residue, MeOH (7 mL) and 92% H<sub>2</sub>SO<sub>4</sub> (0.3 mL) was added, the resulting solution was stirred at 20 °C for 24 h, and the solvent was removed *in vacuo*. The residue was dissolved in ethyl acetate (20 mL), washed with distilled water (3x5 mL) to neutral pH of washings, followed by the solution drying over MgSO<sub>4</sub>, and the solvent was evaporated *in vacuo*. The product was isolated from the residue by preparative TLC (elution with ethyl acetate–hexane, 1:1). Compound **10** (0.299 g, yield: 61%) was obtained as a colorless powder, mp 130–132 °C (dec.).

**<sup>1</sup>H NMR (300.1 MHz, acetone-d<sub>6</sub>):** δ 6.51 (br s, 1 H, NH<sub>2</sub>), 7.47 and 7.83 (2 dd,  $J_{\text{H,H1}} = 8$  Hz,  $J_{\text{H,H2}} = 2$  Hz, 2 H, CH<sup>2,3</sup>), 7.92 and 8.12 (2 dd,  $J_{\text{H,H1}} = 8$  Hz,  $J_{\text{H,H2}} = 2$  Hz, 2 H, CH<sup>4,5</sup>), 7.95 (s, 2 H, CH<sup>1,6</sup>) ppm. **<sup>13</sup>C NMR (75.5 MHz, acetone-d<sub>6</sub>):** δ 61.1 and 71.5 (CH<sup>4,5</sup>), 70.6 and 73.2 (CH<sup>2,3</sup>), 74.9 and 75.1 (CH<sup>1,6</sup>), 155.3 (C=O) ppm. **<sup>14</sup>N NMR (21.7 MHz, acetone-d<sub>6</sub>):** δ −40 ( $\Delta\nu_{1/2} = 100$  Hz) (4 NO<sub>2</sub>) ppm. **IR (KBr):**  $\nu$ ~ 3468 (s) and 3324 (s) (NH<sub>2</sub>), 3039 (w) (CH), 1708 (vs) (C=O), 1604 (vs) and 1555 (s) (*as* NNO<sub>2</sub>), 1325 (s), 1290 (vs) and 1266 (vs) (*sym* NNO<sub>2</sub>) cm<sup>−1</sup>. **HRMS (ESI):**  $m/z$  calcd for [C<sub>7</sub>H<sub>8</sub>N<sub>12</sub>O<sub>10</sub> + Na<sup>+</sup>]: 443.0379; found [ $M$  + Na]<sup>+</sup>: 443.0386.

#### 4-Cyano-10-nitroso-2,6,8,12-tetranitro-2,4,6,8,10,12-hexaazaisowurtzitane (6).

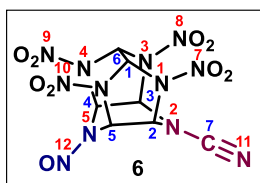

**A.** To a solution of **5** (0.055 g, 0.147 mmol) in dry acetonitrile (4 mL), NOBF<sub>4</sub> (0.034 g, 0.290 mmol) was added. The reaction mixture was stirred at 20 °C for 35 min until **5** disappeared by TLC (eluent, ethyl acetate–hexane, 1:1) and then poured into water (10 mL). The product was extracted with ethyl acetate (2x10 mL), the extract was washed with water (2x2 mL). After drying the extract over MgSO<sub>4</sub>, and evaporating of the solvent *in vacuo*, compound

**6** was isolated from the residue by preparative TLC (elution with ethyl acetate–hexane, 1:2). Compound **6** (0.030 g, yield: 51%) was obtained as a colorless powder, DSC. (5 °C·min<sup>-1</sup>): onset 209 °C, max 229 °C. Density (pycnometer, 26 °C): 1.899 g·cm<sup>-3</sup>.

**<sup>1</sup>H NMR (600.13 MHz, acetone-d<sub>6</sub>):** δ 7.14 and 7.43 (br s, 2 H, CH<sup>2,3</sup>), 8.02 and 8.24 (br s, 2 H, CH<sup>4,5</sup>), 8.10 (s, 2 H, CH<sup>1,6</sup>) ppm. **<sup>13</sup>C{<sup>1</sup>H} NMR (150.9 MHz, acetone-d<sub>6</sub>):** δ 60.3 and 72.6 (CH<sup>4,5</sup>), 73.9 and 74.6 (CH<sup>2,3</sup>), 72.6 (CH<sup>1,6</sup>), 110.2 (CN) ppm. **<sup>14</sup>N NMR (43.37 MHz, acetone-d<sub>6</sub>):** δ -42 (Δv<sub>1/2</sub> = 79 Hz) (4 NO<sub>2</sub><sup>cage</sup>) ppm. **<sup>15</sup>N NMR ([INVGATED], 60.8 MHz, acetone-d<sub>6</sub>):** δ -185.8, -182.8, -182.2, -181.9 (N<sup>1,3</sup> and N<sup>4,6</sup>), -170.5 (CN<sup>11</sup>), -172.8 (N<sup>12</sup>O), -144.6 (N<sup>5</sup>), -41.6, -41.4, -41.3, -41.0 (N<sup>7,8</sup> and N<sup>9,10</sup>) ppm. **IR (KBr):** 3035 (m) (CH), 2247 (m) (CN), 1606 (vs) and 1565 (s) (*as* NNO<sub>2</sub>), 1326 (s), 1289 (vs) and 1267 (vs) (*sym* NNO<sub>2</sub>) cm<sup>-1</sup>. **Elemental analysis** for C<sub>7</sub>H<sub>6</sub>N<sub>12</sub>O<sub>9</sub> (402.20): calcd C, 20.90; H, 1.50; N, 41.79 %; found C, 20.89; H, 1.37; N, 41.45 %.

**B.** To an emulsion of Tf<sub>2</sub>O (0.300 mL, 1.80 mmol) in dry dichloroethane (5 mL), pyridine (0.15 mL, 1.86 mmol) was added dropwise. The resulting mixture was stirred at 20 °C for 10 min, and then was added dropwise to a suspension of **10** (0.108 g, 0.257 mmol) in dry dichloroethane (5 mL) at 0–5 °C. The reaction mixture was stirred at 20 °C for 20 min until **10** disappeared by TLC (eluent, ethyl acetate–hexane, 1:1), then the solvent was removed *in vacuo*. The residue was dissolved in ethyl acetate (15 mL), washed with water (3×5 mL). After drying the solution over MgSO<sub>4</sub>, and evaporating of the solvent *in vacuo*, compound **6** was isolated from the residue by flash column chromatography (elution with ethyl acetate–hexane, 1:1). To the crude product, Et<sub>2</sub>O (1 mL) was added, the precipitate formed was filtered off and air-dried. Compound **6** (0.043 g, yield: 42%) was obtained as a colorless powder. The physicochemical parameters of the sample are in agreement with those of compound **6** obtained by method A.

#### 4-(2,2,2-Trinitroethyl)-2,6,8,12-tetranitro-2,4,6,8,10,12-hexaazaisowurtzitane (**12**).

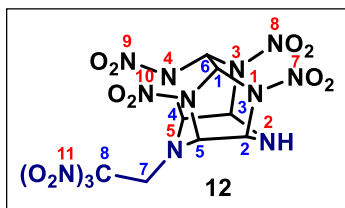

To a suspension of **11** (0.360 g, 0.900 mmol) in dry acetonitrile (8 mL) trinitromethane (0.277 g, 1.80 mmol) was added dropwise. The reaction mixture was stirred at 20 °C for 0.5 h, then diluted with water (40 mL). The product was extracted

with ethyl acetate (3×20 mL), the extract was washed with water (3×10 mL). After drying the extract over MgSO<sub>4</sub>, and evaporating of the solvent *in vacuo*, compound **15** was isolated from the residue by flash column chromatography (elution with ethyl acetate–hexane, 1:1). To the crude product, a mixture of Et<sub>2</sub>O and hexane, 1:1 (2 mL), was added, the precipitate formed was filtered off and air-dried. Compound **12** (0.270 g, yield: 58%) was obtained as a colorless powder, mp 202–204 °C (dec.).

**<sup>1</sup>H NMR (300.1 MHz, acetone-d<sub>6</sub>):**  $\delta$  5.46 (s, 2H, CH<sub>2</sub>), 5.69 (br s, 1 H, NH), 6.34 and 6.36 (2 d,  $J_{H,H}$  = 3 Hz, 2 H, CH<sup>2,3</sup>), 6.60 (d,  $J_{H,H}$  = 7 Hz, 2 H, CH<sup>4,5</sup>), 7.71 (s, 2 H, CH<sup>1,6</sup>) ppm. **<sup>13</sup>C NMR (75.5 MHz, acetone-d<sub>6</sub>):**  $\delta$  55.7 (CH<sub>2</sub>), 72.9 and 73.0 (CH<sup>2,3</sup>), 73.5 (CH<sup>1,6</sup>), 77.7 (CH<sup>4,5</sup>), 128.0 (C(NO<sub>2</sub>)<sub>3</sub>) ppm. **<sup>14</sup>N NMR (21.7 MHz, acetone-d<sub>6</sub>):**  $\delta$  -37 ( $\Delta\nu_{1/2}$  = 80 Hz) (4 NNO<sub>2</sub>), -37 ( $\Delta\nu_{1/2}$  = 80 Hz) (3 CNO<sub>2</sub>) ppm. **IR (KBr):**  $\nu$ ~ 3042 (m) (CH), 1609 (vs) (*as* CNO<sub>2</sub>), 1596 (vs) and 1561 (s) (*as* NNO<sub>2</sub>), 1327 (vs), 1286 (vs) and 1270 (vs) (*sym* CNO<sub>2</sub> and NNO<sub>2</sub>) cm<sup>-1</sup>. **HRMS (ESI):**  $m/z$  calcd for [C<sub>8</sub>H<sub>9</sub>N<sub>13</sub>O<sub>14</sub> + Cl<sup>-</sup>]: 546.0075; found [M + NH<sub>4</sub>]<sup>-</sup>: 546.0077. **Elemental analysis** for C<sub>8</sub>H<sub>9</sub>N<sub>13</sub>O<sub>14</sub> (377.19): calcd C, 18.79; H, 1.76; N, 35.62 %; found C, 19.25; H, 1.50; N, 35.37 %.

**4-Carbomoyl-10-(2,2,2-trinitroethyl)-2,6,8,12-tetranitro-2,4,6,8,10,12-hexaazaisowurtzitane (14).**

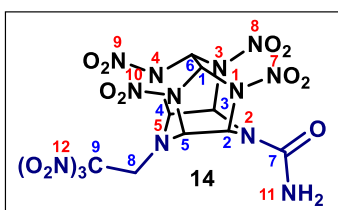

To a solution of **12** (0.600 g, 1.18 mmol) in dry acetonitrile (5 mL), a solution of trichloroacetyl isocyanate (1.33 g, 7.00 mmol) in dry acetonitrile (7 mL) was added dropwise. The reaction mixture was stirred at 20 °C for 6 h, and the solvent was removed *in vacuo*. To the residue, MeOH (8 mL) and 92% H<sub>2</sub>SO<sub>4</sub> (0.4 mL) was added, the resulting solution was stirred at 20 °C for 15 h, and the solvent was removed *in vacuo*. The residue was dissolved in ethyl acetate (20 mL), washed with distilled water (3x5 mL) to neutral pH of washings, followed by the solution drying over MgSO<sub>4</sub> and the solvent was evaporated *in vacuo*. To the residue, a mixture of Et<sub>2</sub>O and hexane, 1:1 (2 mL), was added, the precipitate formed was filtered off and air-dried. Compound **14** (0.63 g, yield: 97%) was isolated as a colorless powder, mp 118–120 °C.

**<sup>1</sup>H NMR (300.1 MHz, acetone-d<sub>6</sub>):**  $\delta$  5.51 (s, 1 H, CH<sub>2</sub>), 6.42 (br s, 2 H, NH<sub>2</sub>), 6.72 (d,  $J_{H,H}$  = 8 Hz, 2 H, CH<sup>4,5</sup>), 7.44 (d,  $J_{H,H}$  = 8 Hz, 2 H, CH<sup>2,3</sup>), 7.84 (s, 2 H, CH<sup>1,6</sup>) ppm. **<sup>13</sup>C NMR (75.5 MHz, acetone-d<sub>6</sub>):**  $\delta$  55.4 (CH<sub>2</sub>), 70.2 (CH<sup>1,6</sup>), 74.2 (CH<sup>2,3</sup>), 78.0 (CH<sup>4,5</sup>), 127.9 (C(NO<sub>2</sub>)<sub>3</sub>), 155.0 (C=O) ppm. **<sup>14</sup>N NMR (21.7 MHz, acetone-d<sub>6</sub>):**  $\delta$  -38 ( $\Delta\nu_{1/2}$  = 113 Hz) (4 NNO<sub>2</sub>), -38 ( $\Delta\nu_{1/2}$  = 33 Hz) (3 CNO<sub>2</sub>) ppm. **IR (KBr):**  $\nu$ ~ 3486 (vs) and 3419 (vs) (NH<sub>2</sub>), 3042 (w) (CH), 1707 (vs) (C=O), 1596 (br vs) (*as* CNO<sub>2</sub> and NNO<sub>2</sub>), 1292 (br s) and 1266 (s) (*sym* CNO<sub>2</sub> and NNO<sub>2</sub>) cm<sup>-1</sup>. **HRMS (ESI):**  $m/z$  calcd for [C<sub>9</sub>H<sub>10</sub>N<sub>14</sub>O<sub>15</sub> + H<sup>+</sup>]: 555.0523; found [M + H]<sup>+</sup>: 555.0511.

**4-Cyano-10-(2,2,2-trinitroethyl)-2,6,8,12-tetranitro-2,4,6,8,10,12-hexaazaisowurtzitane (15).**

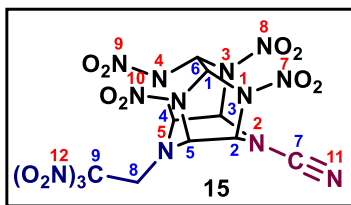

To a solution of  $\text{TiF}_4$  (0.60 mL, 3.64 mmol) in dry acetonitrile (5 mL), pyridine (0.30 mL, 3.70 mmol) was added dropwise. The resulting mixture was stirred at 20 °C for 10 min, and was added dropwise to a solution of **14** (0.300 g, 0.540 mmol) in dry acetonitrile (5 mL). The reaction mixture was stirred at 20 °C for 2.5 h, then diluted with water (40 mL). The product was extracted with ethyl acetate (2×20 mL), the extract was washed with water (3×5 mL). After drying the extract over  $\text{MgSO}_4$ , and evaporating of the solvent *in vacuo*, compound **15** was isolated from the residue by flash column chromatography (elution with ethyl acetate–hexane, 1:2). To the crude product,  $\text{Et}_2\text{O}$  (1 mL), was added, the precipitate formed was filtered off and air-dried. Compound **15** (0.255 g, yield: 88%) was obtained as a colorless powder, DSC. (5 °C·min<sup>-1</sup>): onset 203 °C, max 220 °C. Density (pycnometer, 26 °C): 1.868 g·cm<sup>-3</sup>.

<sup>1</sup>H NMR (600.13 MHz, acetone-d<sub>6</sub>): δ 5.49 (s, 2 H, CH<sub>2</sub>), 6.87 (d,  $J_{\text{H,H}} = 8$  Hz, 2 H, CH<sup>4,5</sup>), 7.07 (d,  $J_{\text{H,H}} = 7$  Hz, 2 H, CH<sup>2,3</sup>), 8.05 (s, 2 H, CH<sup>1,6</sup>) ppm. <sup>13</sup>C{<sup>1</sup>H} NMR (150.9 MHz, acetone-d<sub>6</sub>): δ 53.2 (CH<sub>2</sub>), 72.9 (CH<sup>1,6</sup>), 73.2 (CH<sup>2,3</sup>), 77.2 (CH<sup>4,5</sup>), 110.4 (CN), 126.3 (C(NO<sub>2</sub>)<sub>3</sub>) ppm. <sup>14</sup>N NMR (43.37 MHz, acetone-d<sub>6</sub>): δ -41 ( $\Delta\nu_{1/2} = 126$  Hz) (2 N<sup>7,8</sup>O<sub>2</sub>), -39 ( $\Delta\nu_{1/2} = 130$  Hz) (2 N<sup>9,10</sup>O<sub>2</sub>) ppm. <sup>15</sup>N{<sup>1</sup>H} NMR ([INVGATED], 60.8 MHz, acetone-d<sub>6</sub>): δ -335.7 (N<sup>2</sup>), -181.4 (N<sup>4,6</sup>), -178.3 (N<sup>1,3</sup>), -170.5 (CN<sup>11</sup>), -144.6 (N<sup>5</sup>), -40.7 (N<sup>7,8</sup>), -38.5 (N<sup>9,10</sup>), -30.7 (C(N<sup>12</sup>O<sub>2</sub>)<sub>3</sub>) ppm. IR (KBr):  $\tilde{\nu}$  3040 (w) (CH), 2247 (m) (CN), 1597 (br vs) (*as* CNO<sub>2</sub> and NNO<sub>2</sub>), 1293 (br s) and 1268 (s) (*sym* CNO<sub>2</sub> and NNO<sub>2</sub>) cm<sup>-1</sup>. HRMS (ESI):  $m/z$  calcd for [C<sub>9</sub>H<sub>8</sub>N<sub>14</sub>O<sub>14</sub> + NH<sub>4</sub><sup>+</sup>]: 559.0237; found [M + NH<sub>4</sub>]<sup>+</sup>: 559.0235.

**4-Carbomoyl-2,6,8,10,12-pentanitro-2,4,6,8,10,12-hexaazaisowurtzitane (20).**

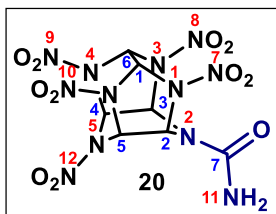

To a solution of **16** (0.500 g, 1.27 mmol) in dry acetonitrile (6 mL), a solution of trichloroacetyl isocyanate (1.05 g, 5.60 mmol) in dry acetonitrile (3 mL) was added dropwise. The reaction mixture was stirred at 20 °C for 24 h, and the solvent was removed *in vacuo*. To the residue, MeOH (10 mL) and 92% H<sub>2</sub>SO<sub>4</sub> (0.2 mL) was added, the resulting solution was stirred at 20 °C for 24 h, and the solvent was removed *in vacuo*. The residue was dissolved in ethyl acetate (15 mL), washed with distilled water (3×5 mL) to neutral pH of washings, followed by the solution drying over  $\text{MgSO}_4$  and the solvent was evaporated *in vacuo*. To the residue,  $\text{Et}_2\text{O}$  (1 mL) was added, the precipitate formed was filtered off and air-dried. Compound **20** (0.443 g, yield: 80%) was isolated as a colorless powder, mp 202–204 °C (dec.) (from EtOH–H<sub>2</sub>O).

**<sup>1</sup>H NMR (300.1 MHz, DMSO-*d*<sub>6</sub>):** δ 7.09 (br s, 2 H, NH<sub>2</sub>), 7.39 (d, *J*<sub>H,H</sub> = 7 Hz, 2 H, CH<sup>2,3</sup>), 7.79 (d, *J*<sub>H,H</sub> = 7 Hz, 2 H, CH<sup>4,5</sup>), 7.93 (s, 2 H, CH<sup>1,6</sup>) ppm. **<sup>13</sup>C NMR (75.5 MHz, DMSO-*d*<sub>6</sub>):** δ 70.0 (CH<sup>2,3</sup>), 70.2 (CH<sup>4,5</sup>), 73.4 (CH<sup>1,6</sup>), 154.2 (C=O) ppm. **<sup>14</sup>N NMR (21.7 MHz, DMSO-*d*<sub>6</sub>):** δ –39 (Δ*v*<sub>1/2</sub> = 431 Hz) (4 NO<sub>2</sub>) ppm. **IR (KBr):**  $\tilde{\nu}$  3487 (vs), 3449 (s), 3400 (s) and 3355 (m) (NH<sub>2</sub>), 3041 (vs) (CH), 1714 (vs) and 1687 (vs) (C=O), 1615 (vs), 1594 (vs) and 1571 (vs) (*as* NNO<sub>2</sub>), 1332 (vs), 1295 (vs) and 1269 (vs) (*sym* NNO<sub>2</sub>) cm<sup>–1</sup>. **Elemental analysis** for C<sub>8</sub>H<sub>10</sub>N<sub>12</sub>O<sub>10</sub> (434.24): calcd C, 19.27; H, 1.85; N, 38.53 %; found C, 19.37; H, 1.85; N, 38.21 %.

#### 4-Cyano-2,6,8,10,12-pentanitro-2,4,6,8,10,12-hexaazaisowurtzitane (**22**).

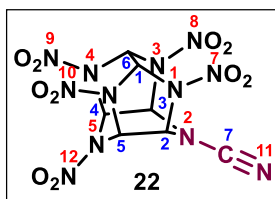

**A.** To a solution of Tf<sub>2</sub>O (0.60 mL, 3.64 mmol) in dry acetonitrile (5 mL), pyridine (0.30 mL, 3.90 mmol) was added dropwise. The resulting mixture was stirred at 20 °C for 10 min, and was added dropwise to a solution of **20** (0.200 g, 0.870 mmol) in dry acetonitrile

(3 mL). The reaction mixture was stirred at 20 °C for 5 h, then diluted with water (20 mL). The product was extracted with ethyl acetate (2×15 mL), the extract was washed with water (3×5 mL). After drying the extract over MgSO<sub>4</sub>, and evaporating of the solvent *in vacuo*, compound **22** was isolated from the residue by flash column chromatography (elution with ethyl acetate –hexane, 1:2). To the crude product, Et<sub>2</sub>O (1 mL) was added, the precipitate formed was filtered off and air-dried. Compound **22** (0.112 g, yield: 58%) was obtained as a colorless powder. The product was further purified by reprecipitation from MeCN with water. DSC (5 °C·min<sup>–1</sup>): onset 223 °C, max 241 °C. Density (pycnometer, 26 °C): 1.924 g·cm<sup>–3</sup>.

**<sup>1</sup>H NMR (600.13 MHz, acetone-*d*<sub>6</sub>):** 7.30 (d, *J*<sub>H,H</sub> = 8 Hz, 2 H, CH<sup>2,3</sup>), 8.17 (s, 2 H, CH<sup>1,6</sup>), 8.25 (d, *J*<sub>H,H</sub> = 8 Hz, 2 H, CH<sup>4,5</sup>) ppm. **<sup>1</sup>H NMR (300.1 MHz, DMSO-*d*<sub>6</sub>):** 7.03 (d, *J*<sub>H,H</sub> = 8 Hz, 2 H, CH<sup>2,3</sup>), 7.81 (d, 2 H, CH<sup>4,5</sup>), 8.01 (s, 2 H, CH<sup>1,6</sup>) ppm. **<sup>13</sup>C{<sup>1</sup>H} NMR (150.9 MHz, acetone-*d*<sub>6</sub>):** δ 72.2 (CH<sup>4,5</sup>), 74.9 (CH<sup>1,6</sup>), 75.2 (CH<sup>2,3</sup>), 111.4 (CN) ppm. **<sup>14</sup>N NMR (43.37 MHz, acetone-*d*<sub>6</sub>):** δ –42 (Δ*v*<sub>1/2</sub> = 156 Hz) (5 NNO<sub>2</sub>) ppm. **<sup>15</sup>N NMR ([INVGATED], 60.8 MHz, acetone-*d*<sub>6</sub>):** δ –328.6 (N<sup>2</sup>), –199.3 (N<sup>5</sup>), –182.4 (N<sup>1,3</sup>), –180.1 (N<sup>4,6</sup>), –171.1 (CN<sup>11</sup>), –43.3 (N<sup>12</sup>), –41.3 (N<sup>9,10</sup>), –41.0 (N<sup>7,8</sup>) ppm. **IR (KBr):**  $\tilde{\nu}$  3042 (s) (CH), 2248 (s) (CN), 1633 (vs), 1593 (vs) and 1571 (vs) (*as* NNO<sub>2</sub>), 1329 (vs), 1292 (vs) and 1258 (vs) (*sym* NNO<sub>2</sub>) cm<sup>–1</sup>. **Elemental analysis** for C<sub>7</sub>H<sub>6</sub>N<sub>12</sub>O<sub>10</sub> (418.20): calcd C, 20.10; H, 1.45; N, 40.19; found C, 20.48; H, 1.32; N, 39.85 %.

**B.** To a solution of **5** (0.060 g, 0.160 mmol) in dry acetonitrile (4 mL), NO<sub>2</sub>BF<sub>4</sub> (0.040 g, 0.300 mmol) was added. The reaction mixture was stirred at 20 °C for 1.5 until **5** disappeared by TLC (eluent, ethyl acetate–hexane, 1:1) and then poured into water (10 mL). The product was extracted with ethyl acetate (2×10 mL), the extract was washed with water (2×2 mL). After drying the extract over MgSO<sub>4</sub>, and evaporating of the solvent *in vacuo*, compound **15**

was isolated from the residue by preparative TLC (elution with ethyl acetate–hexane, 1:2), Compound **22** (0.037 g, yield: 55%) was obtained as a colorless powder. The physicochemical parameters of the sample are in agreement with those of compound **22** obtained by method A.

#### 4,10-Dicarbomoyl-2,6,8,12-tetranitro-2,4,6,8,10,12-hexaazaisowurtzitane (**21**).

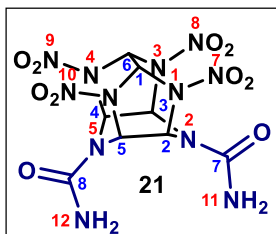

To a suspension of **17** (0.560 g, 1.61 mmol) in dry acetonitrile (15 mL), a solution of trichloroacetyl isocyanate (3.00 g, 15.9 mmol) in dry acetonitrile (10 mL) was added dropwise. The reaction mixture was stirred at 20 °C for 24 h, and the solvent was removed *in vacuo*.

To the residue, MeOH (25 mL) and 92% H<sub>2</sub>SO<sub>4</sub> (0.3 mL) was added, the resulting solution was stirred at 20 °C for 24 h, and the solvent was removed *in vacuo*. The residue was dissolved in ethyl acetate (50 mL), washed with distilled water (2x20 mL) to neutral pH of washings, followed by the solution drying over MgSO<sub>4</sub> and the solvent was evaporated *in vacuo*. To the residue, Et<sub>2</sub>O (50 mL) was added, the precipitate formed was filtered off, washed with Et<sub>2</sub>O (2x20 mL) and air-dried. Compound **21** (0.650 g, yield: 93%) was isolated as a colorless powder, dec. (observed on Kofler's table, 5 °C·min<sup>-1</sup>): 245 °C.

**<sup>1</sup>H NMR (300.1 MHz, acetone-d<sub>6</sub>):** δ 6.51 (br s, 2 H, NH<sub>2</sub>), 7.43 (d, *J*<sub>H,H</sub> = 7 Hz, 2 H, CH<sup>2,3</sup> and CH<sup>4,5</sup>), 7.79 (s, 2 H, CH<sup>1,6</sup>) ppm. **<sup>13</sup>C NMR (75.5 MHz, acetone-d<sub>6</sub>):** δ 68.7 (CH<sup>2,3</sup> and CH<sup>4,5</sup>), 73.4 (CH<sup>1,6</sup>), 154.4 (C=O) ppm. **<sup>14</sup>N NMR (21.7 MHz, acetone-d<sub>6</sub>):** δ –38 (Δ*v*<sub>1/2</sub> = 130 Hz) (4 NO<sub>2</sub>) ppm. **IR (KBr):** *v*~ 3426 (vs), 3320 (vs) (NH<sub>2</sub>), 3268 (s) and 3205 (s) (NH<sub>2</sub>), 3040 (s) (CH), 1678 (br vs) (C=O), 1611 (vs) and 1557 (vs) (*as* NNO<sub>2</sub>), 1323 (vs), 1288 (vs) and 1263 (vs) (*sym* NNO<sub>2</sub>) cm<sup>-1</sup>. **HRMS (ESI):** *m/z* calcd for [C<sub>8</sub>H<sub>10</sub>N<sub>12</sub>O<sub>10</sub> + H<sup>+</sup>]: 435.0716; found [*M* + H]<sup>+</sup>: 435.0707.

#### 4,10-Dicyano-2,6,8,12-tetranitro-2,4,6,8,10,12-hexaazaisowurtzitane (**23**).

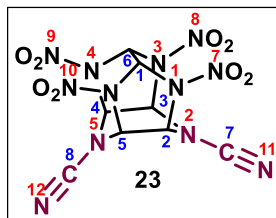

To a solution of Tf<sub>2</sub>O (0.58 mL, 1.22 mmol) in dry acetonitrile (9 mL), pyridine (0.28 mL, 3.60 mmol) was added dropwise. The resulting mixture was stirred at 20 °C for 5 min, and was added dropwise to a suspension of **21** (0.191 g, 0.440 mmol) in dry acetonitrile (9 mL).

The reaction mixture was stirred at 20 °C for 24 h, and the solvent was removed *in vacuo*. The residue was dissolved in ethyl acetate (50 mL), the solution was washed with water (2x20 mL). After drying the solution over MgSO<sub>4</sub>, and evaporating of the solvent *in vacuo*, compound **23** was isolated from the residue by flash column chromatography (elution with ethyl acetate). To the crude product, Et<sub>2</sub>O (50 mL) was added, the precipitate was filtered off and air-dried. Compound **23** (0.160 g, yield: 91%) was

obtained as a colorless powder. The product was further purified by recrystallization from MeCN–H<sub>2</sub>O. DSC (5 °C·min<sup>-1</sup>): onset 238 °C, max 249 °C (from MeCN–H<sub>2</sub>O). Density (pycnometer, 26 °C): 1.858 g·cm<sup>-3</sup>.

**<sup>1</sup>H NMR (300.1 MHz, acetone-d<sub>6</sub>):** δ 7.13 (s, 2 H, CH<sup>2,3</sup> and CH<sup>4,5</sup>), 8.10 (s, 2 H, CH<sup>1,6</sup>) ppm. **<sup>1</sup>H NMR (600.13 MHz, DMSO-d<sub>6</sub>):** δ 6.82 (s, 2 H, CH<sup>2,3</sup> and CH<sup>4,5</sup>), 7.93 (s, 2 H, CH<sup>1,6</sup>) ppm. **<sup>13</sup>C{<sup>1</sup>H} NMR (150.9 MHz, DMSO-d<sub>6</sub>):** δ 73.6 (CH<sup>2,3</sup>, CH<sup>4,5</sup> and CH<sup>1,6</sup>), 111.2 (2 CN) ppm. **<sup>14</sup>N NMR (43.37 MHz, DMSO-d<sub>6</sub>):** δ -24 (Δν<sub>1/2</sub> = 416 Hz) (4 NNO<sub>2</sub>) ppm. **<sup>15</sup>N NMR ([INVGATED], 60.8 MHz, DMSO-d<sub>6</sub>):** δ -328.6 (N<sup>2,5</sup>), -182.7 (N<sup>1,3</sup> and N<sup>4,6</sup>), -171.6 (CN<sup>11</sup>), -40.8 (N<sup>7,8</sup> and N<sup>9,10</sup>) ppm. **IR (KBr):** ν̃ 3031 (vs) (CH), 2246 (vs) (CN), 1616 (vs), 1599 (s) and 1565 (vs) (*as* NNO<sub>2</sub>), 1349 (vs), 1330 (vs), 1298 (vs) and 1264 (vs) (*sym* NNO<sub>2</sub>) cm<sup>-1</sup>. **Elemental analysis** for C<sub>8</sub>H<sub>6</sub>N<sub>12</sub>O<sub>8</sub> (398.21): calcd C, 24.13; H, 1.52; N, 42.21%; found C, 24.12; H, 1.51; N, 42.21 %.

# $^1\text{H}$ NMR (300.1 MHz, $[\text{D}_6]$ acetone) spectrum of compound 4

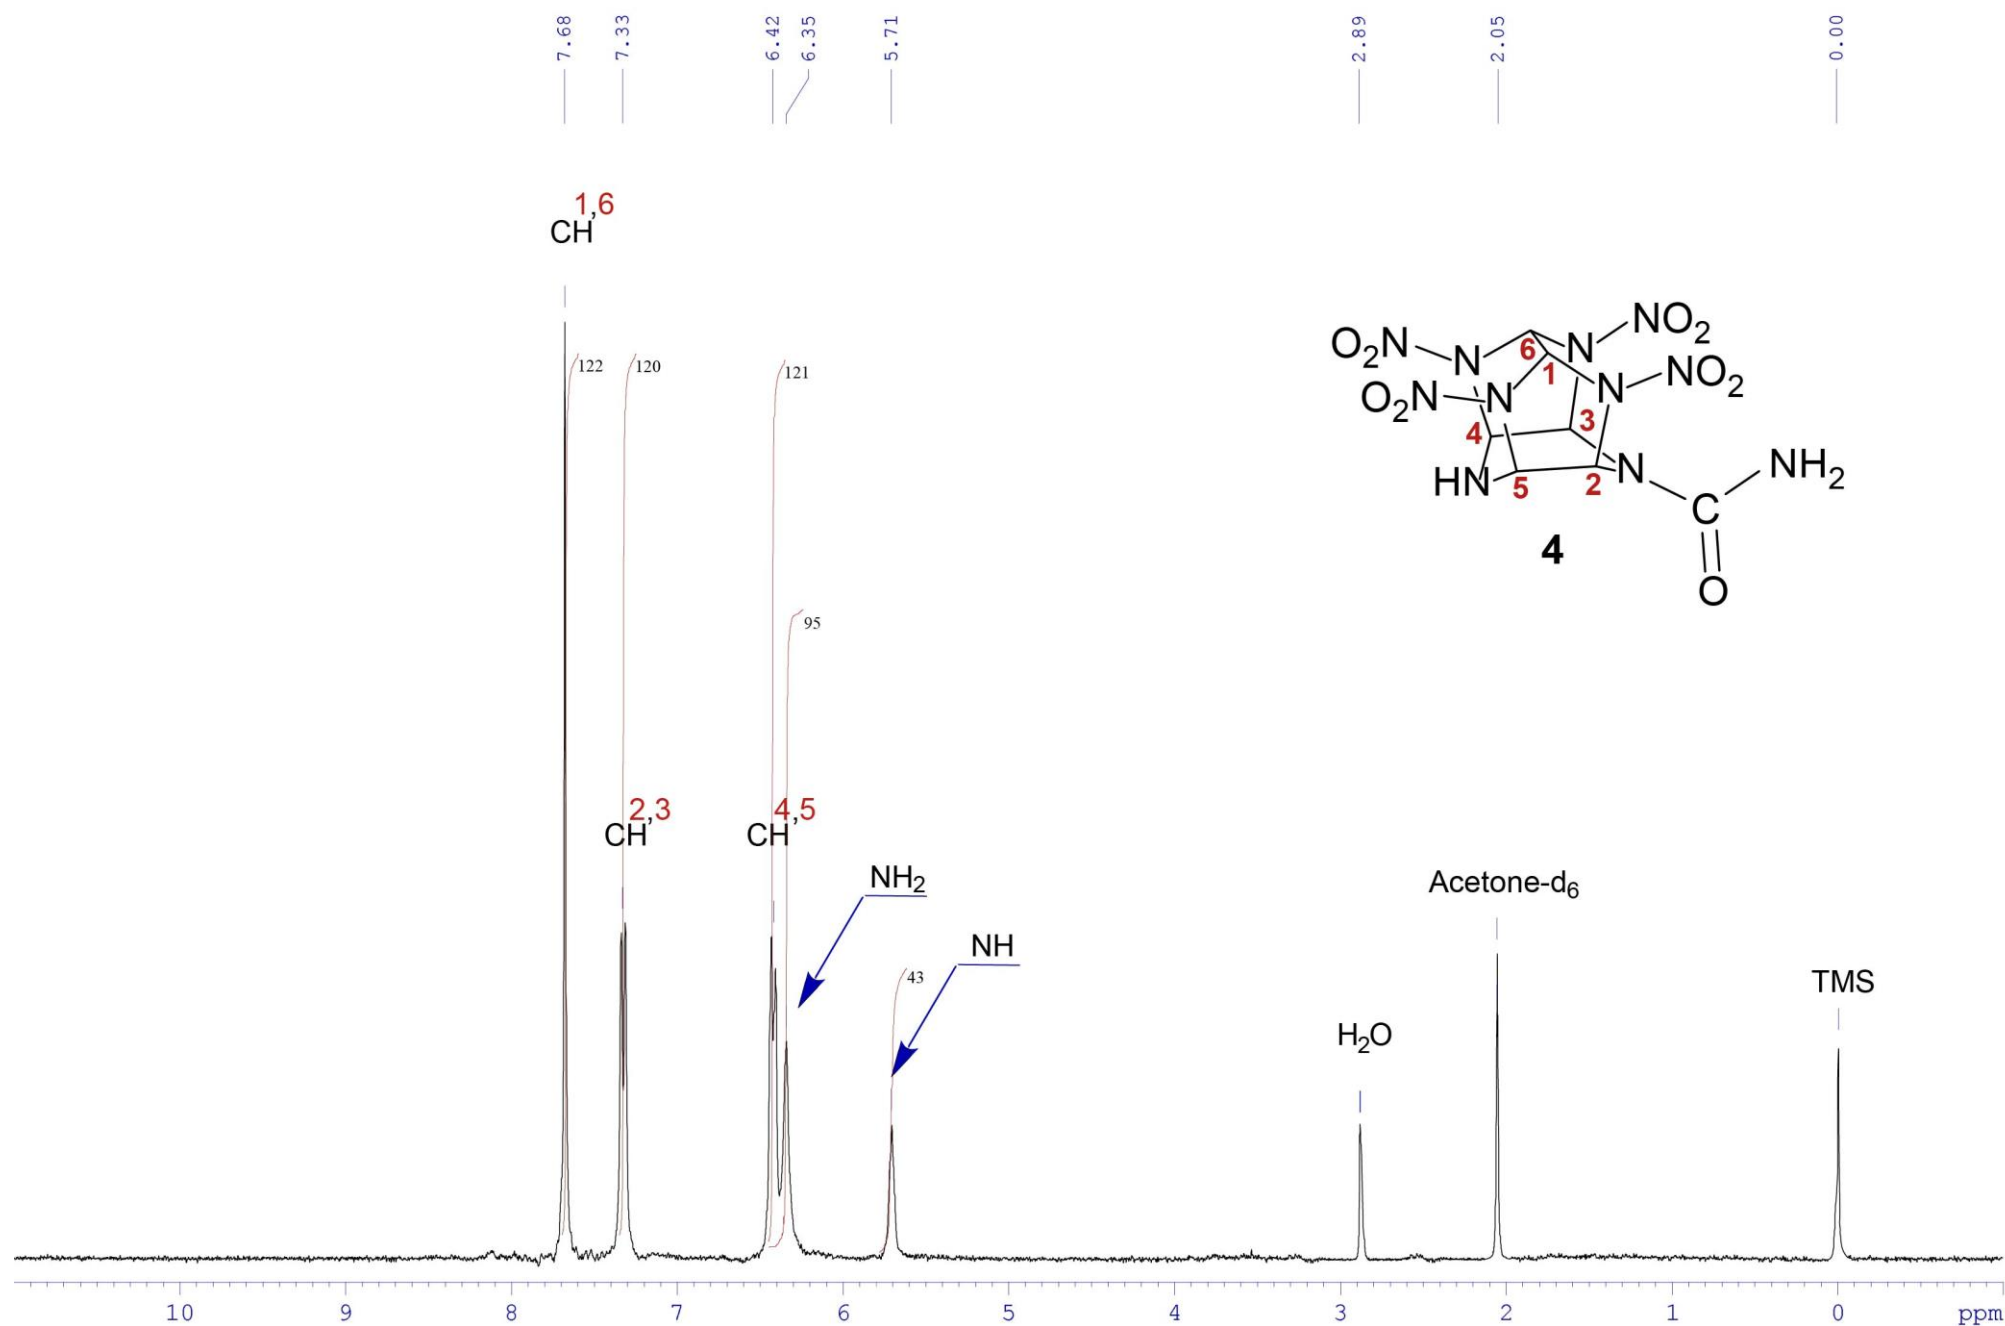

# $^1\text{H}$ NMR (300.1 MHz, $[\text{D}_6]\text{DMSO}$ ) spectrum of compound 4

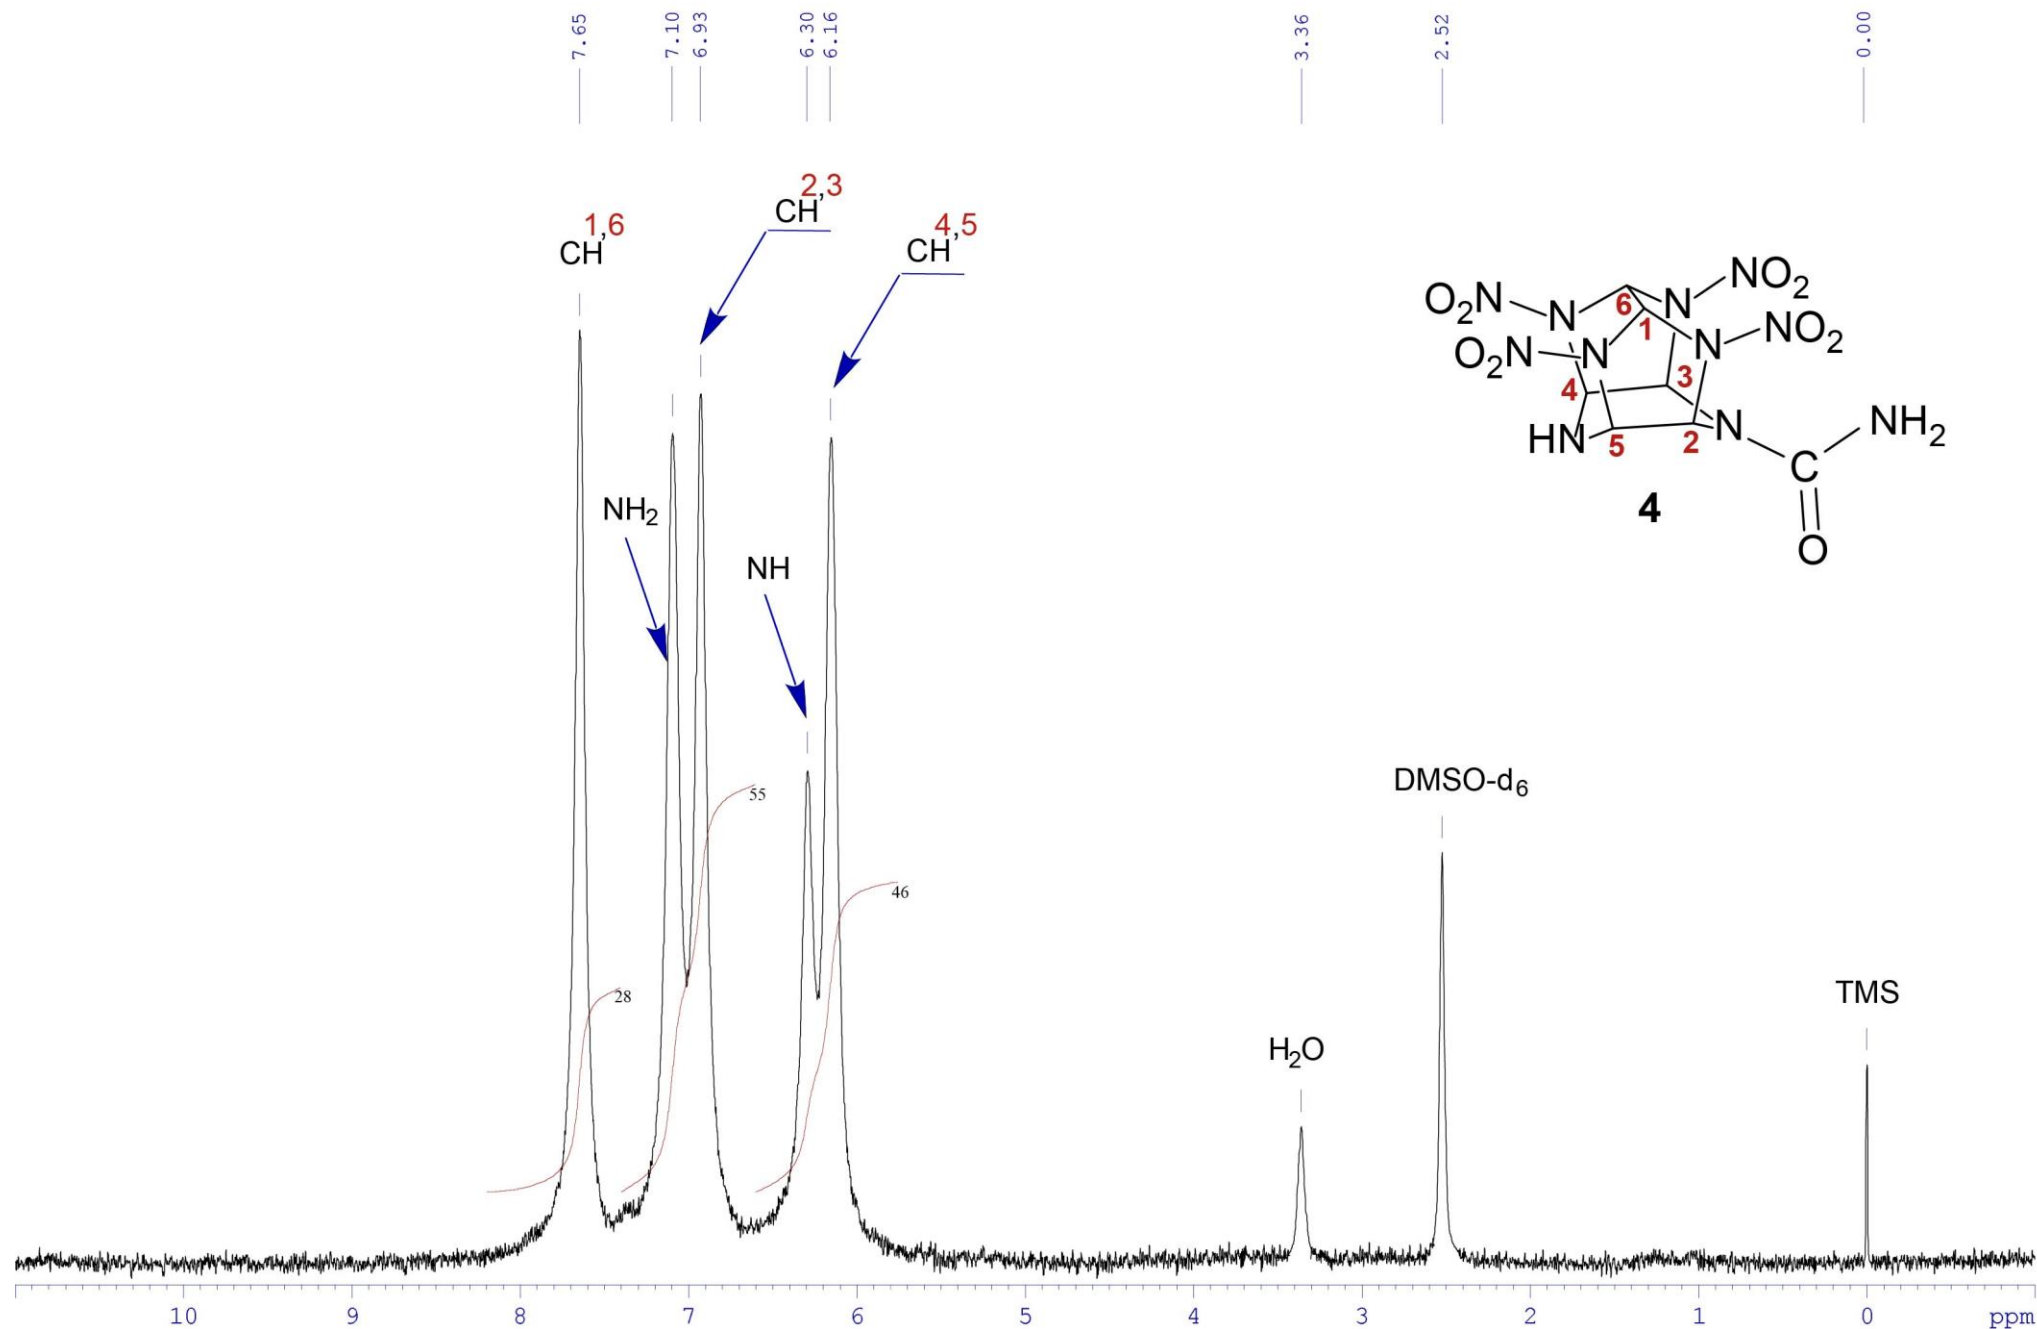

# $^{13}\text{C}$ NMR (75.1 MHz, $[\text{D}_6]\text{DMSO}$ ) spectrum of compound 4

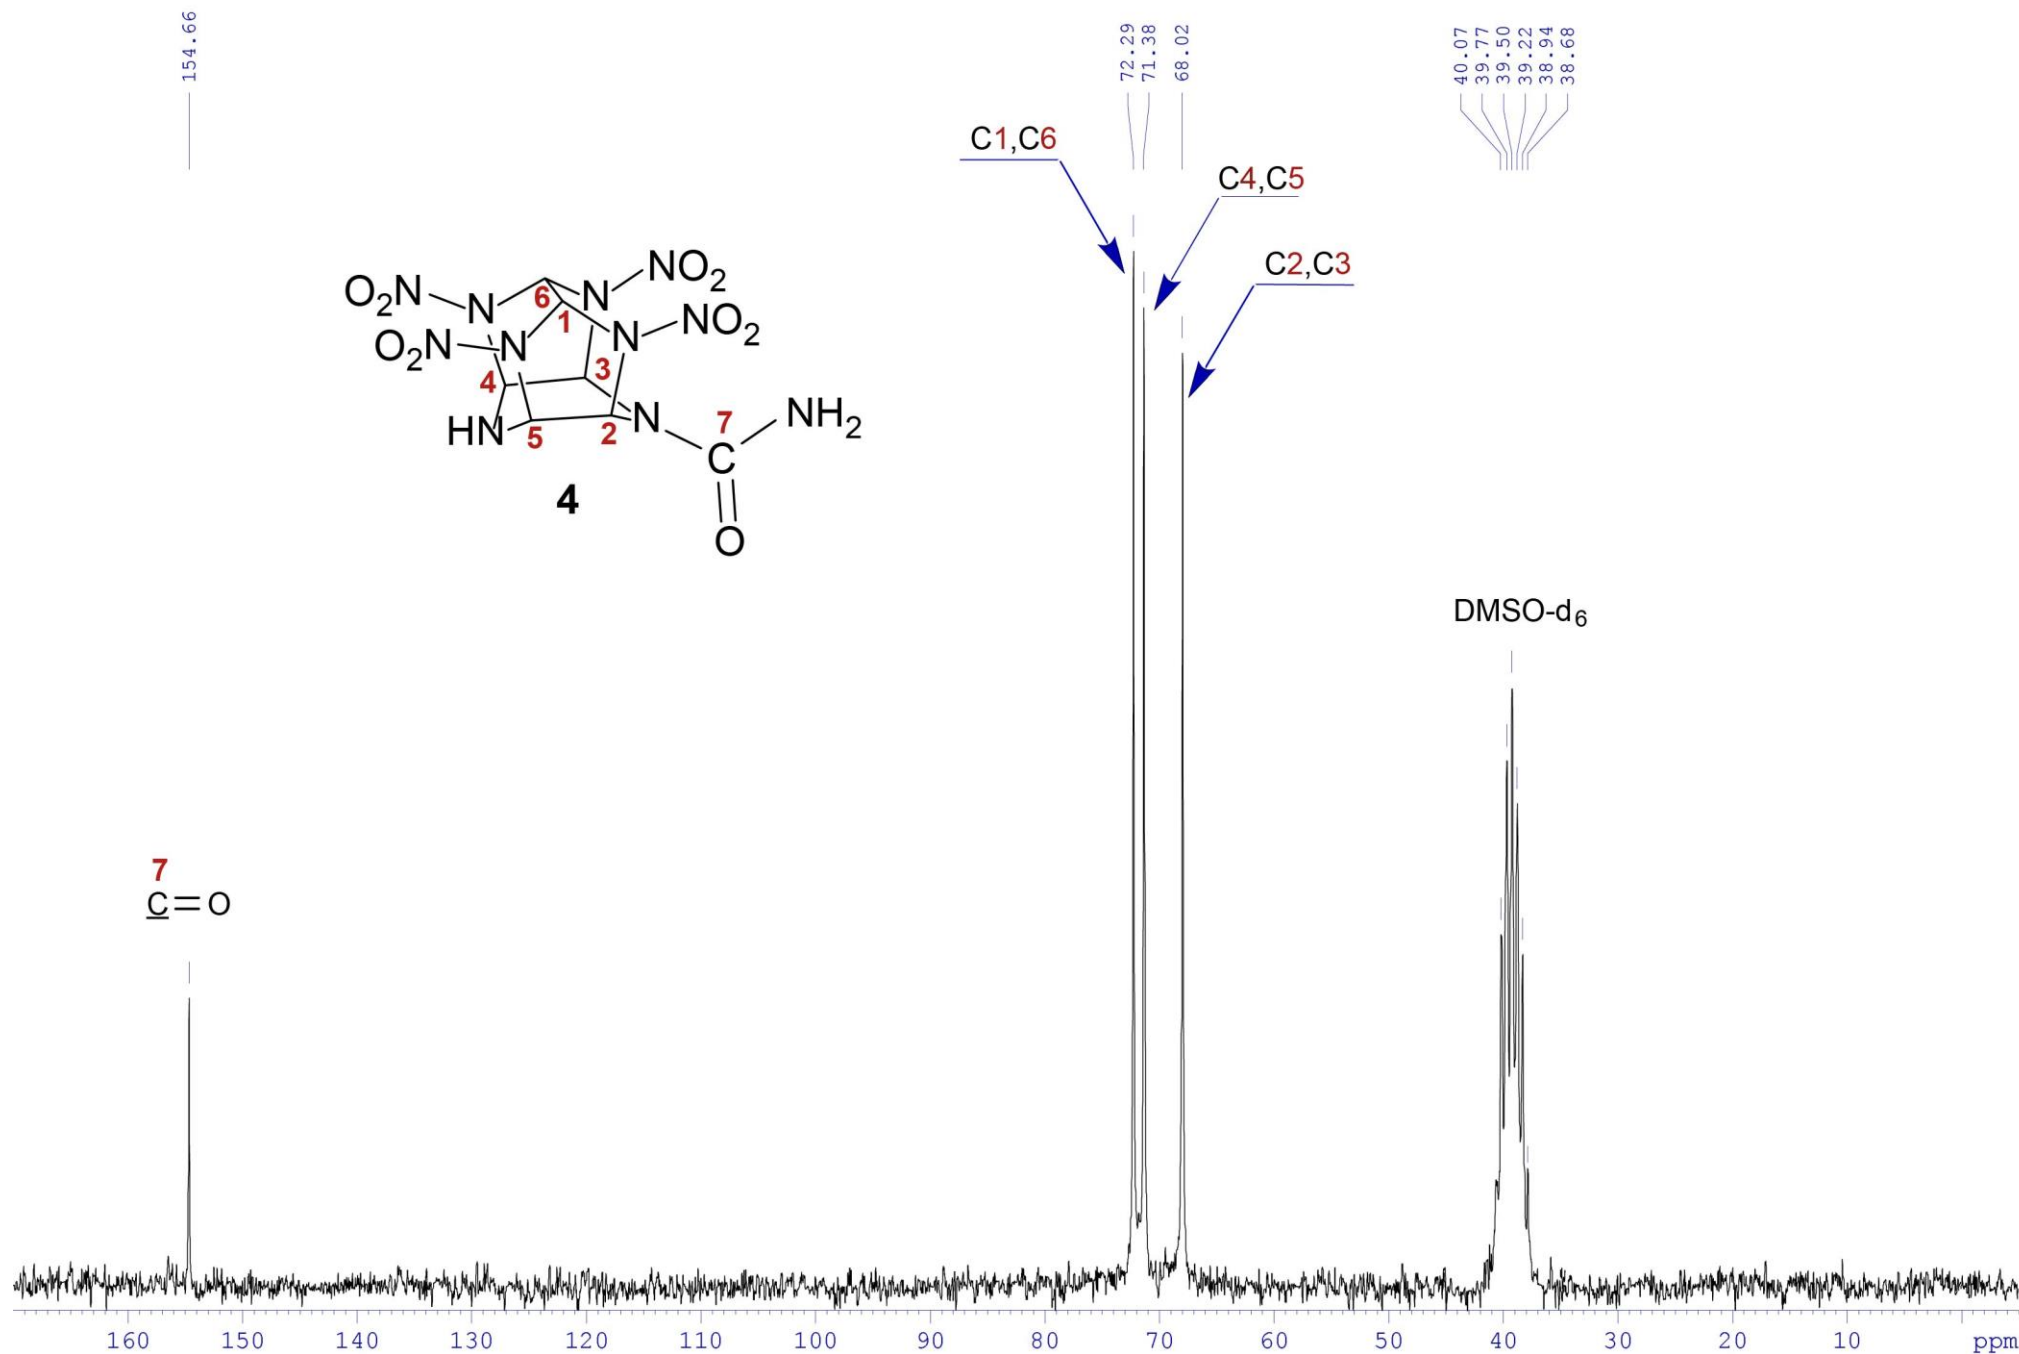

**$^{14}\text{N}$  NMR (22 MHz,  $[\text{D}_6]\text{DMSO}$ ) spectrum of compound 4**

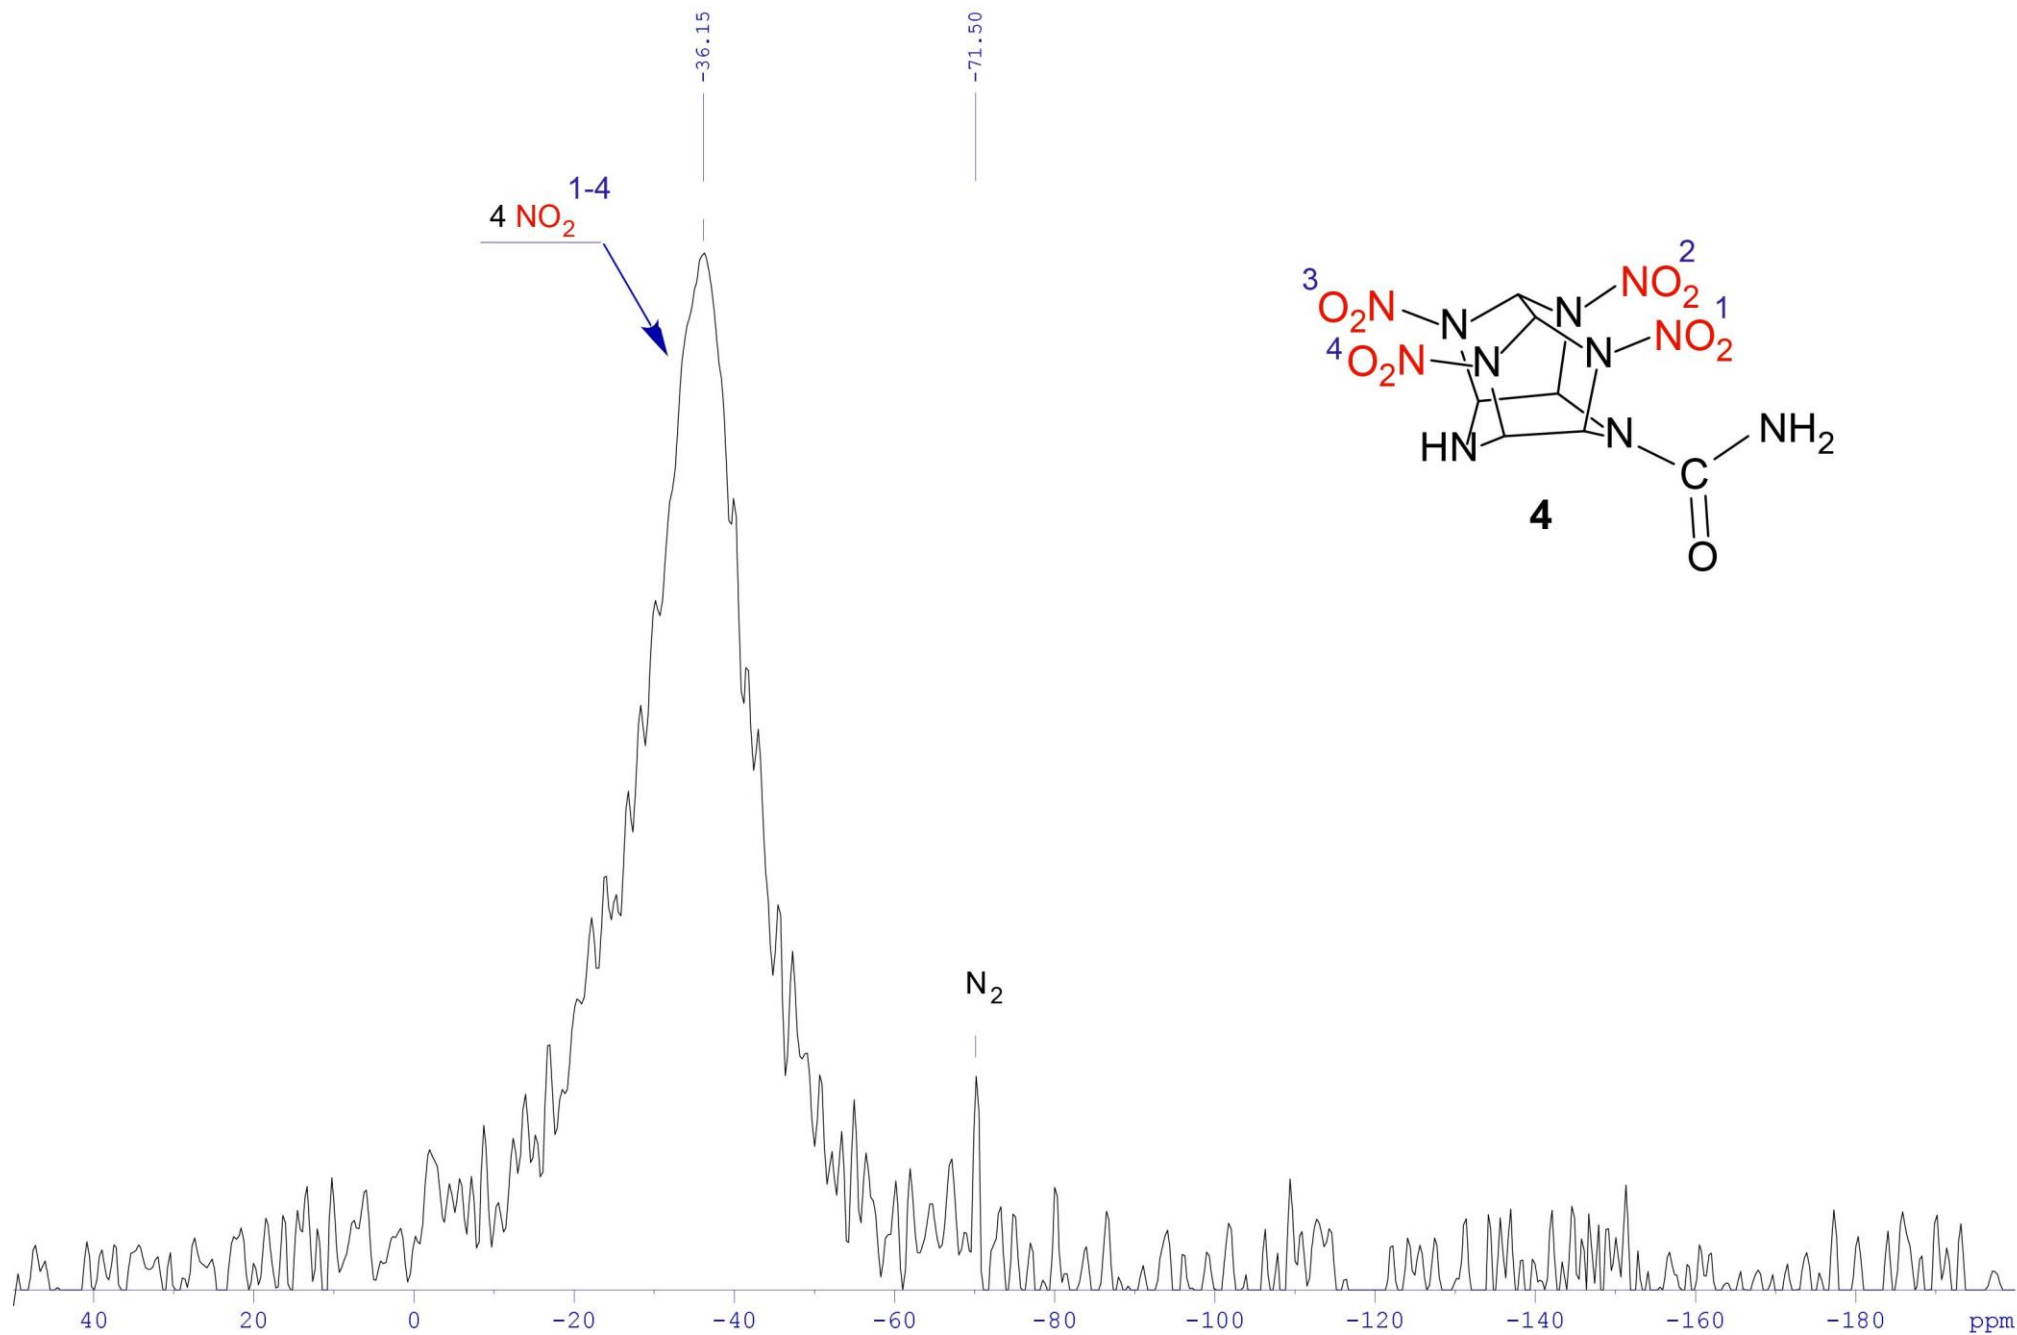

# IR (KBr) spectrum of compound 4

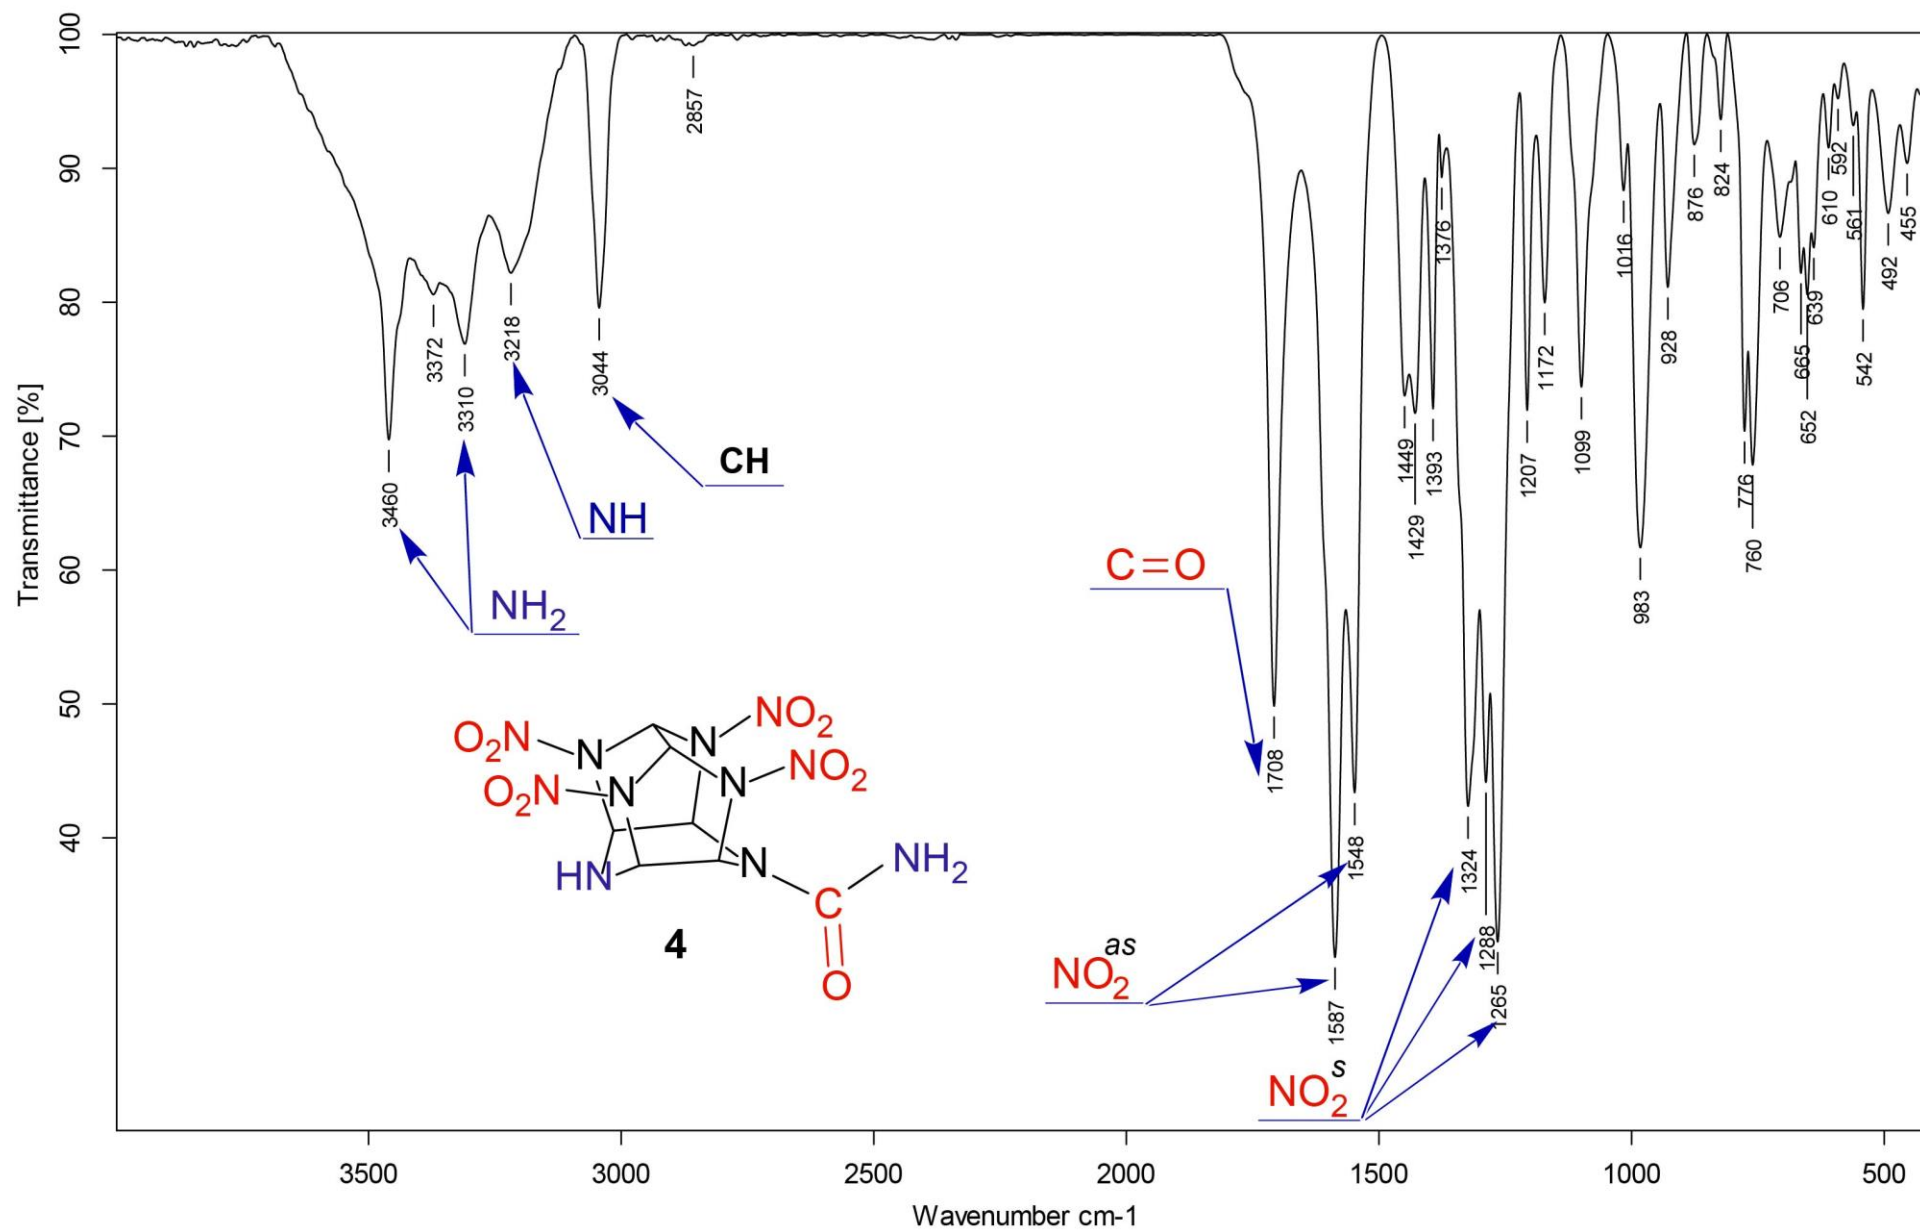

# HRMS (ESI) for compound 4

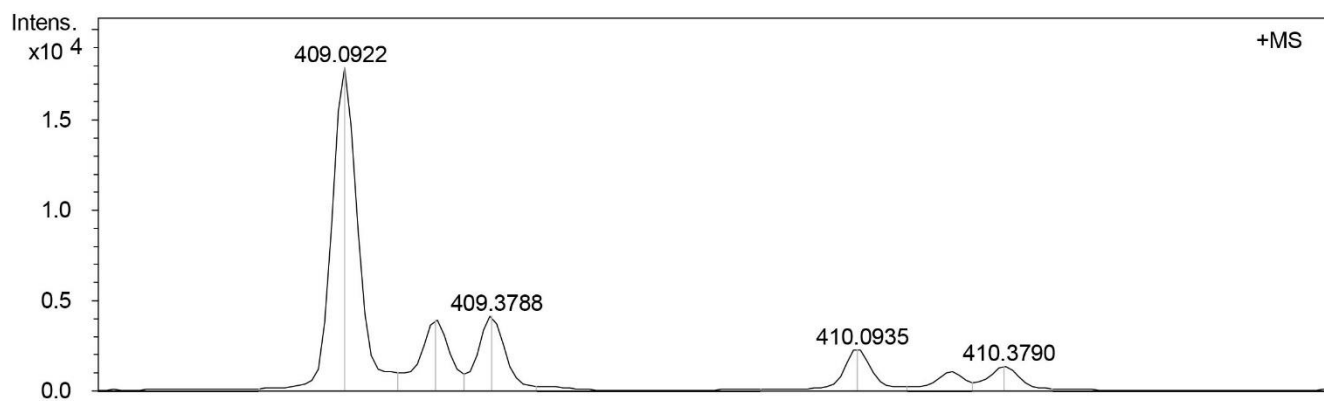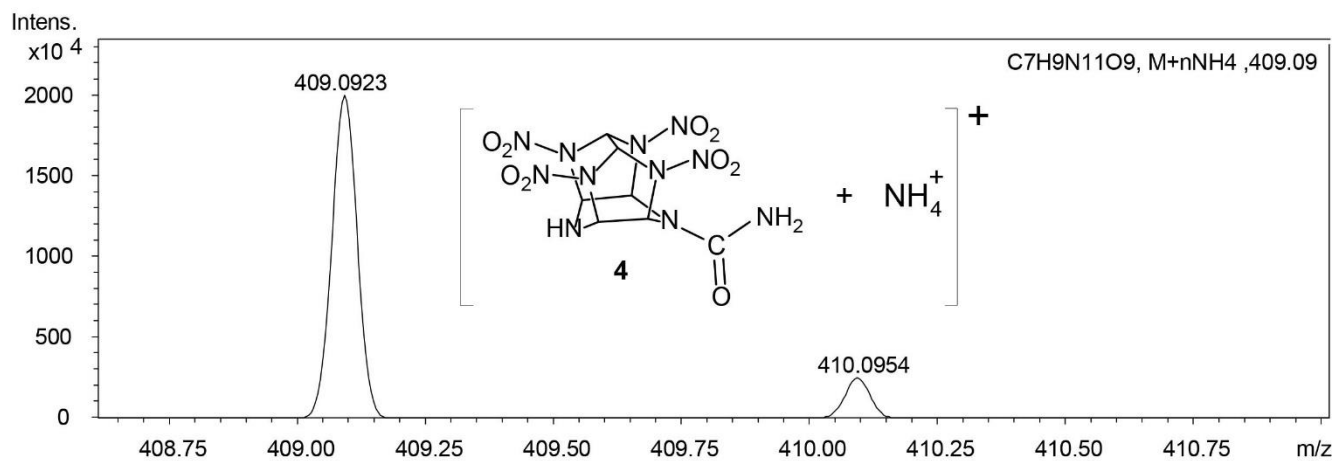

**$^1\text{H}$  NMR (600.13 MHz,  $[\text{D}_6]$ acetone) spectrum of compound 5**

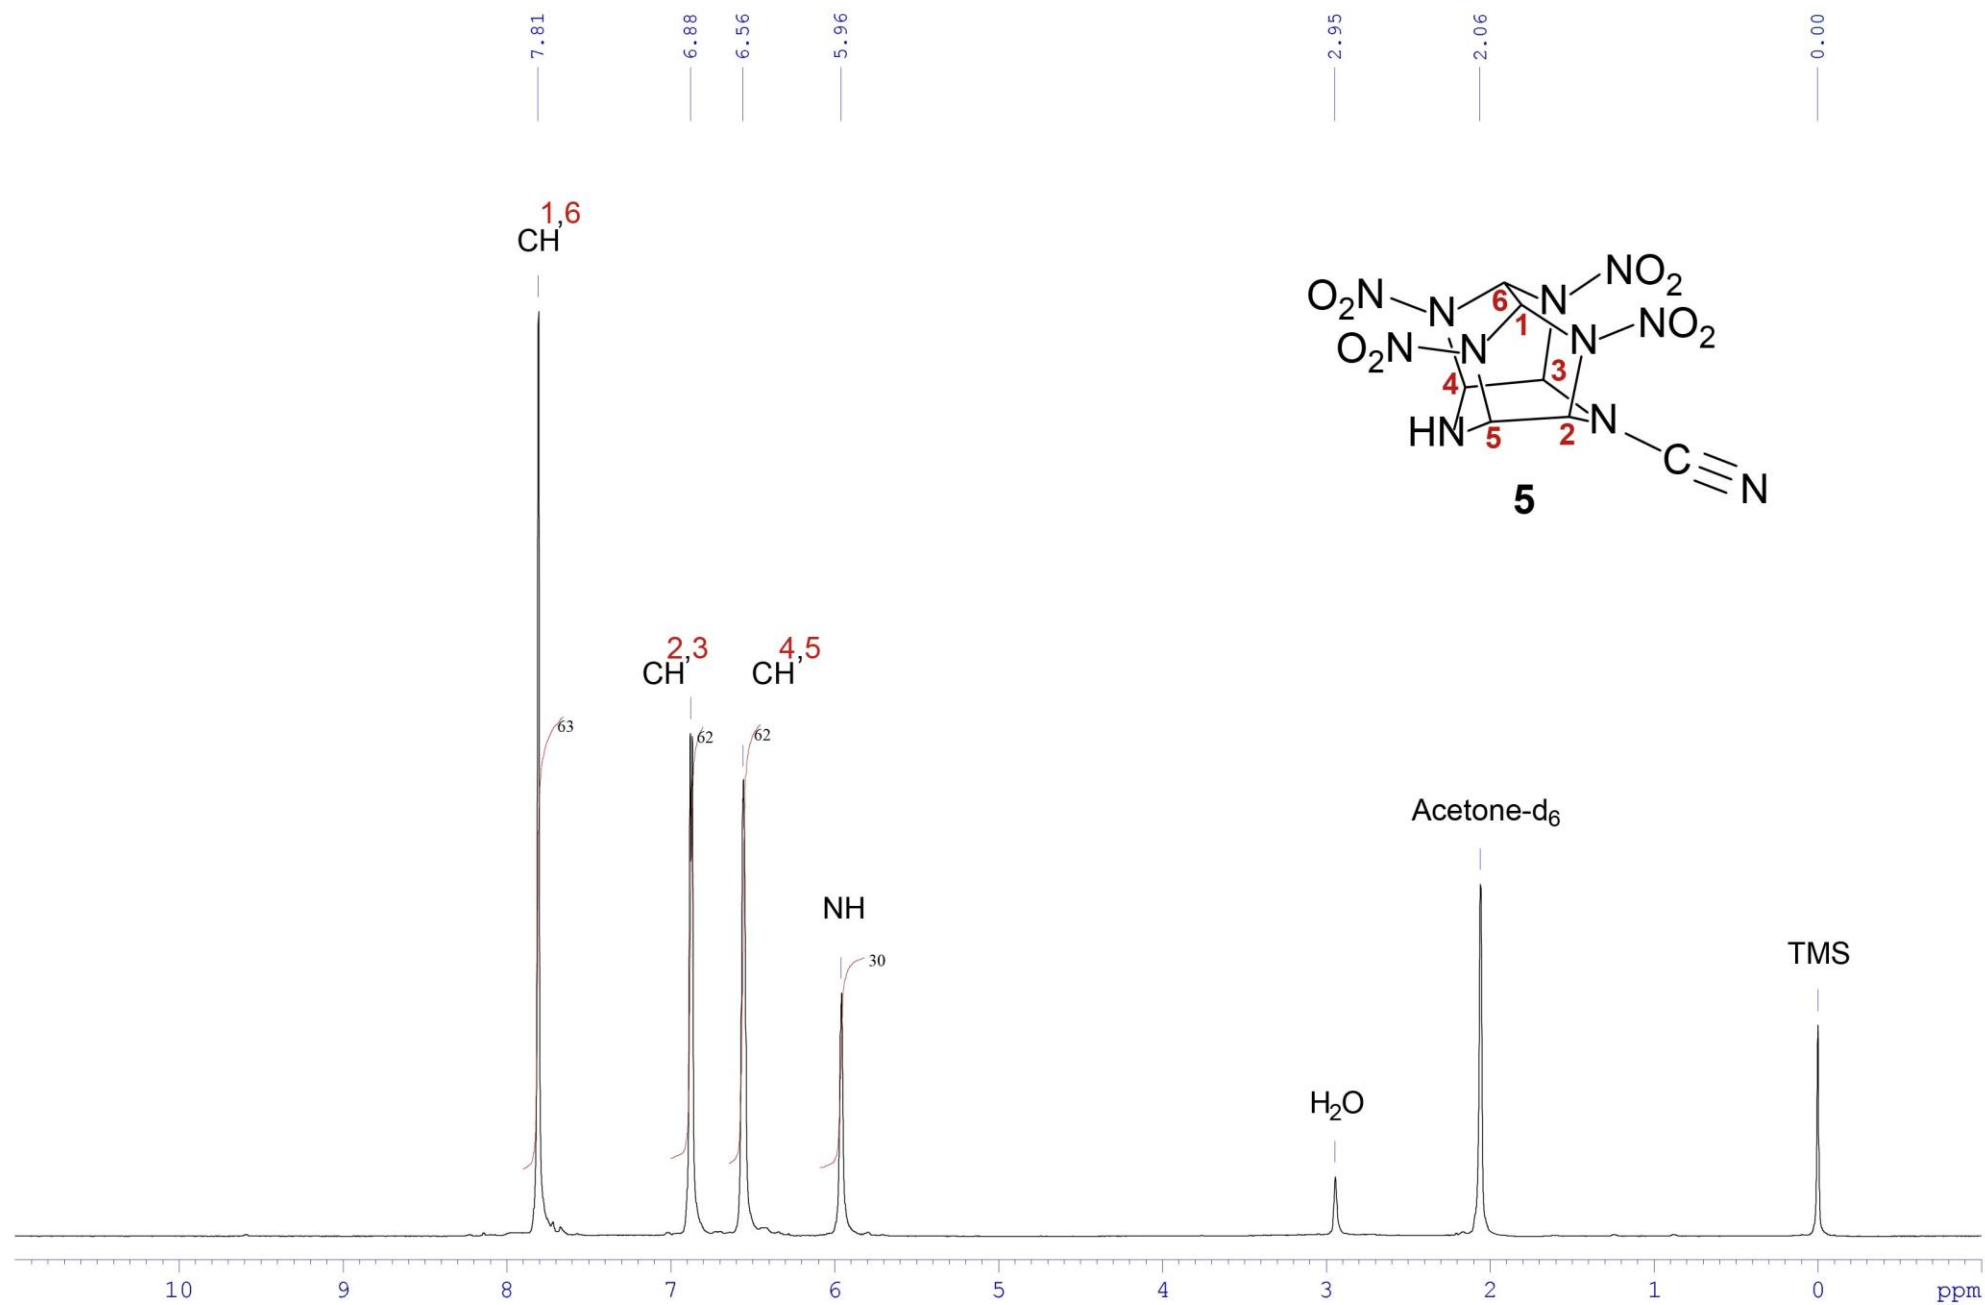

**$^{13}\text{C}$  NMR (150.9 MHz,  $[\text{D}_6]$ acetone) spectrum of compound 5**

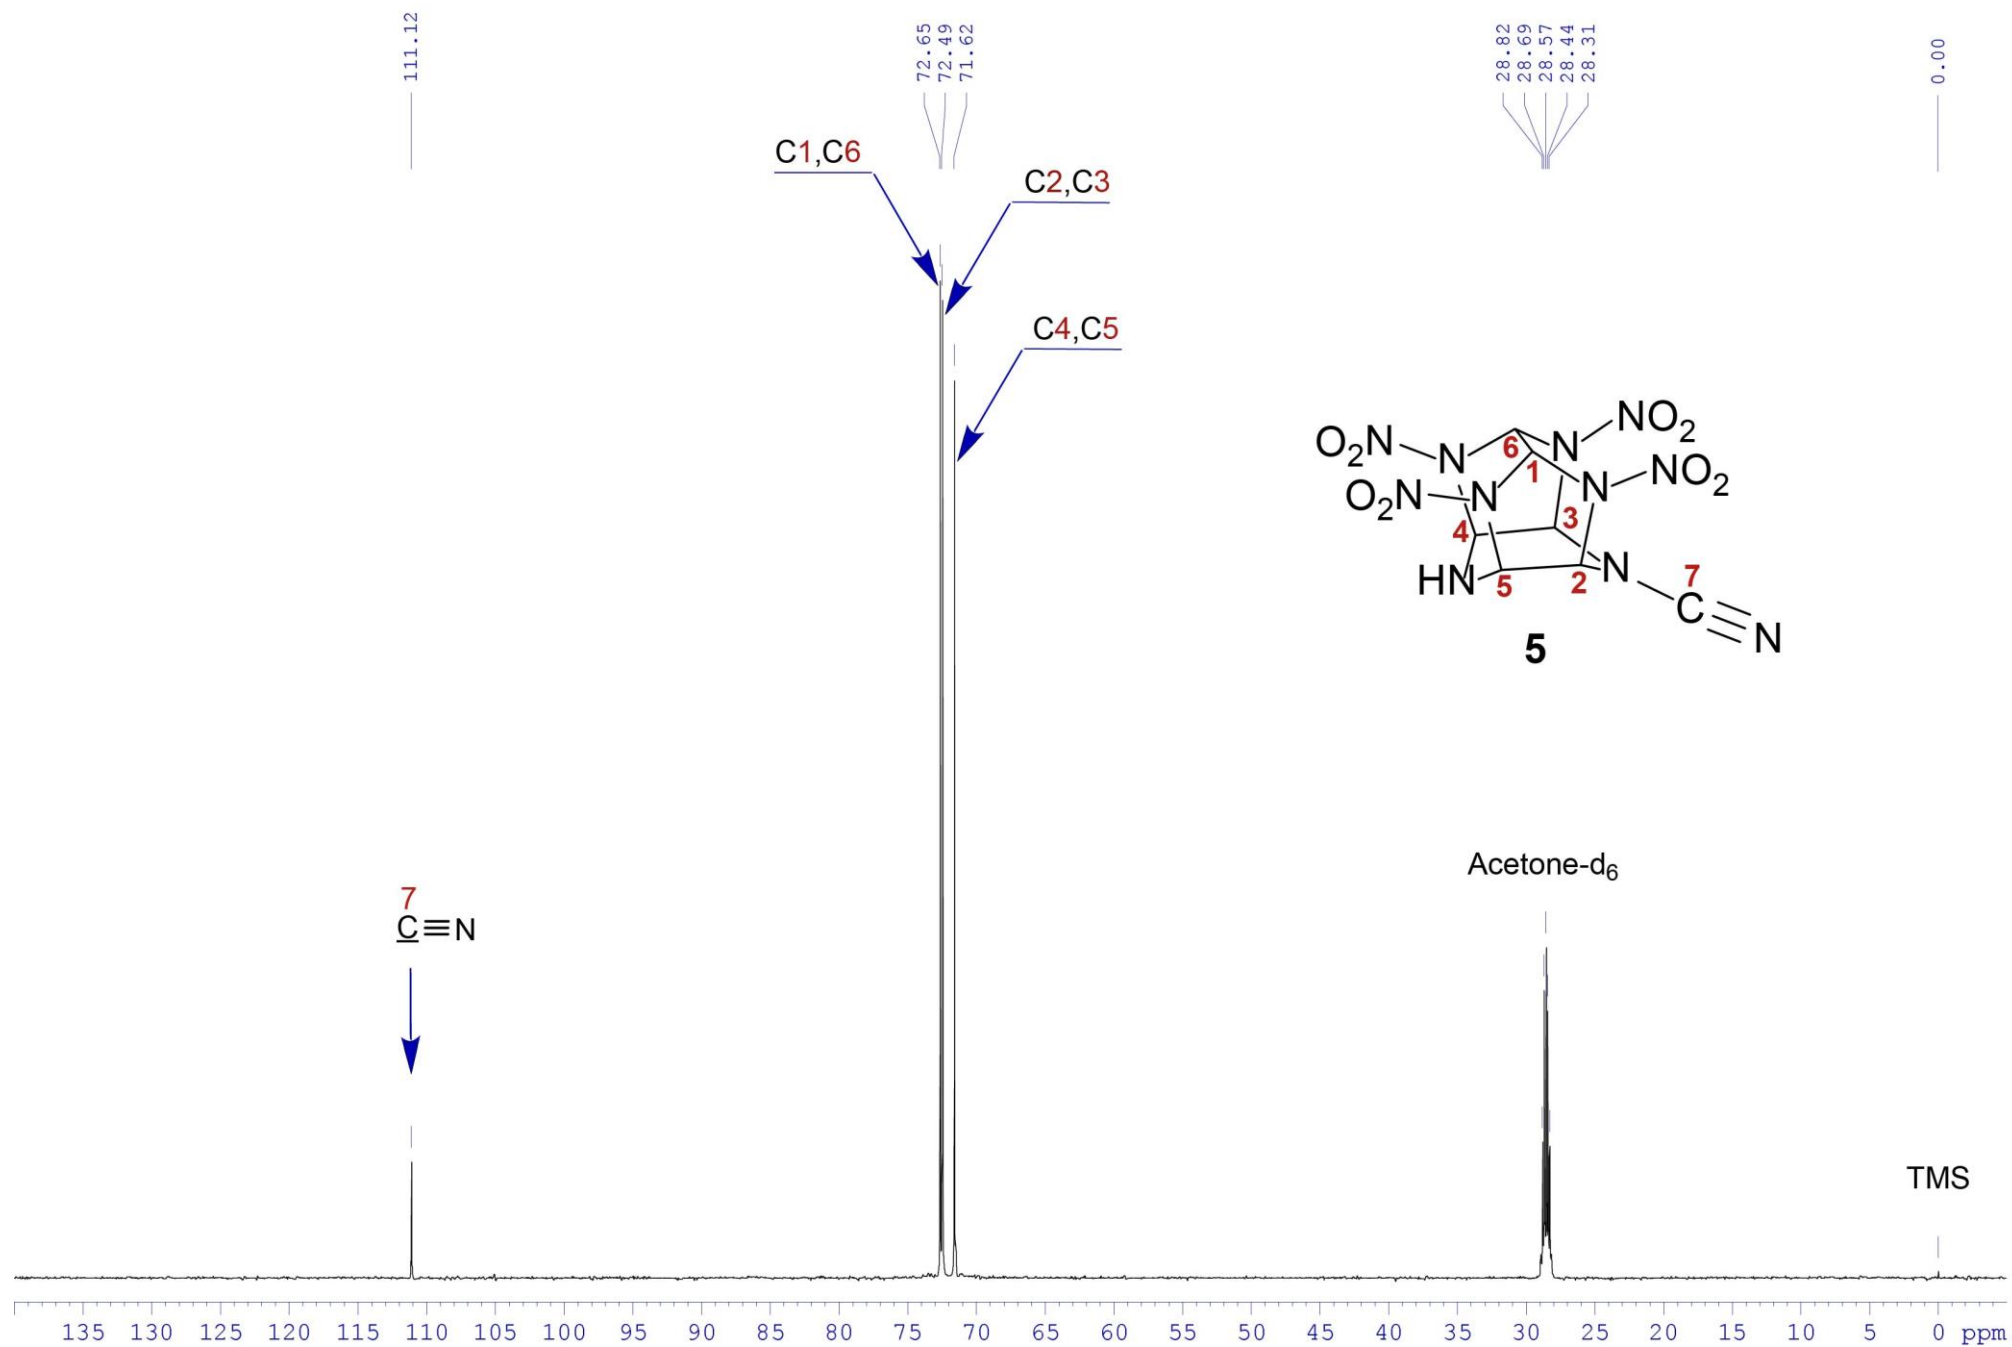

**$\{^1\text{H}-^{13}\text{C}\}$  COSY NMR (600.13 MHz,  $[\text{D}_6]\text{acetone}$ ) spectrum of compound 5**

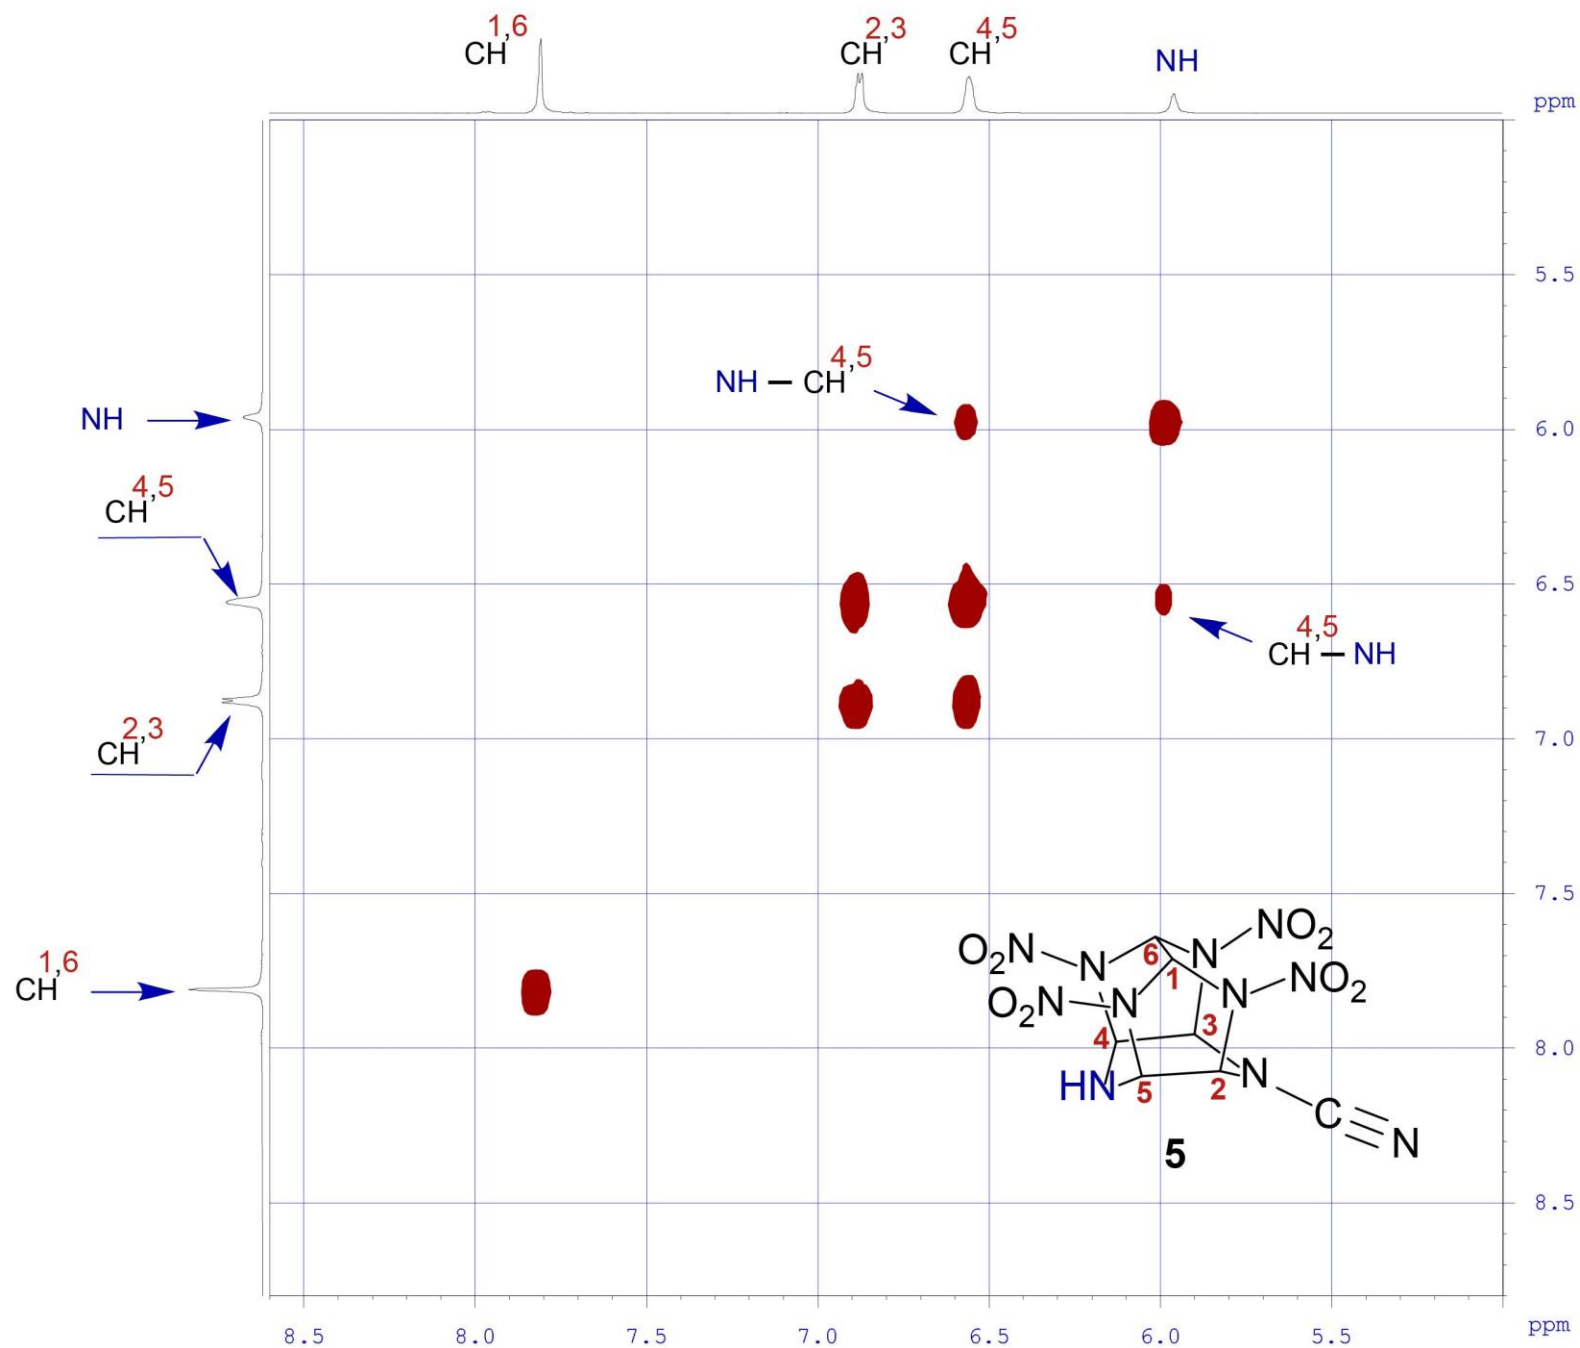

**{<sup>1</sup>H–<sup>13</sup>C} HSQC NMR (600.13 MHz, [D<sub>6</sub>]acetone) spectrum of compound 5**

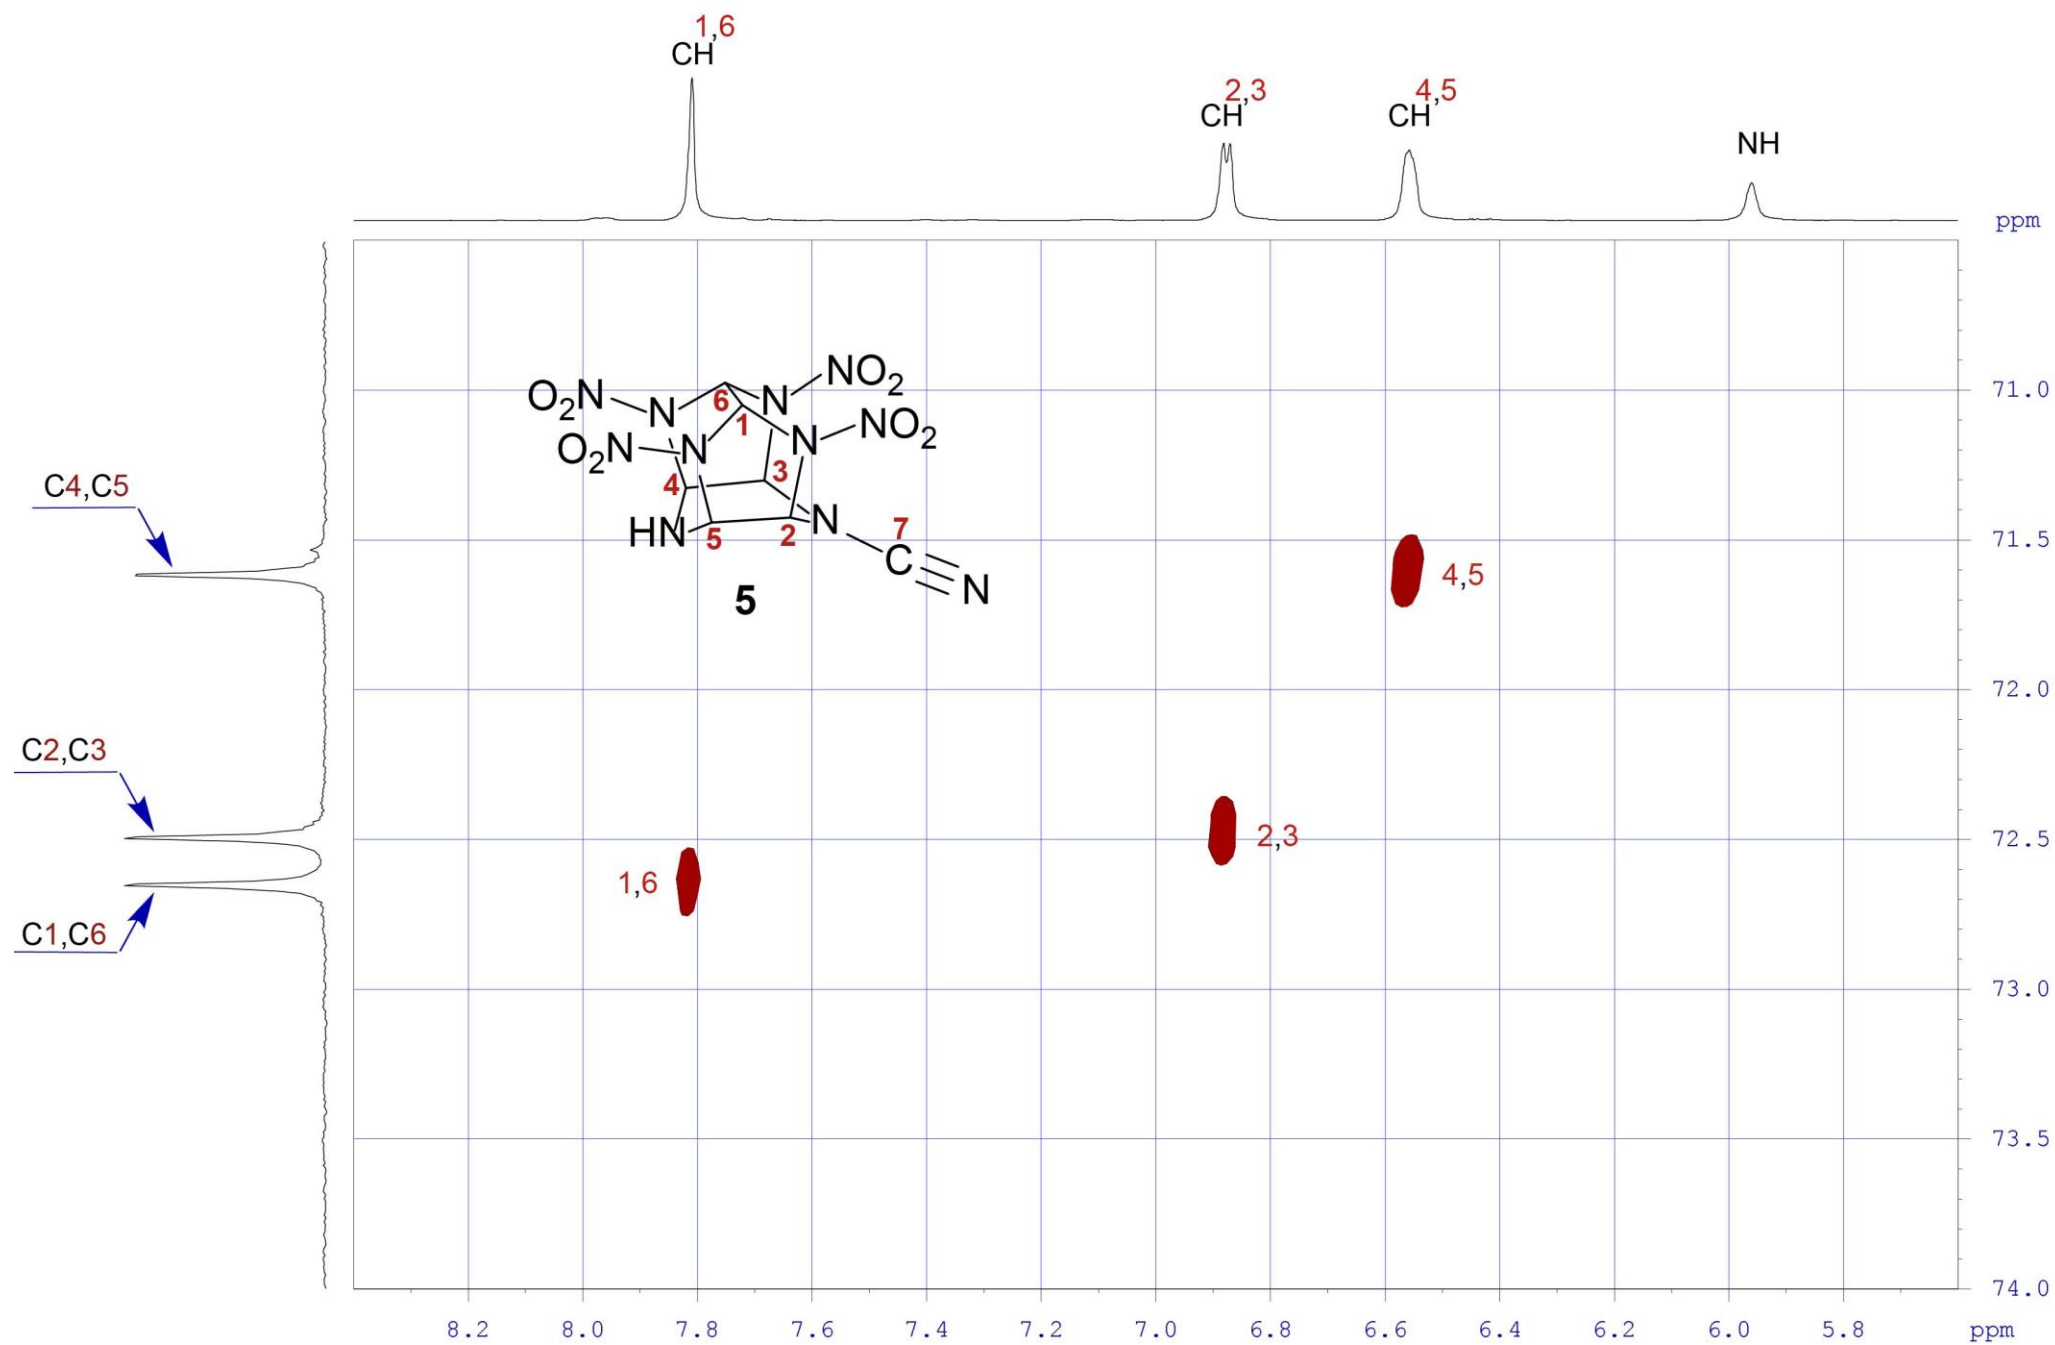

**$\{^1\text{H}-^{13}\text{C}\}$  HMBC NMR (600.13 MHz,  $[\text{D}_6]\text{acetone}$ ) spectrum of compound 5**

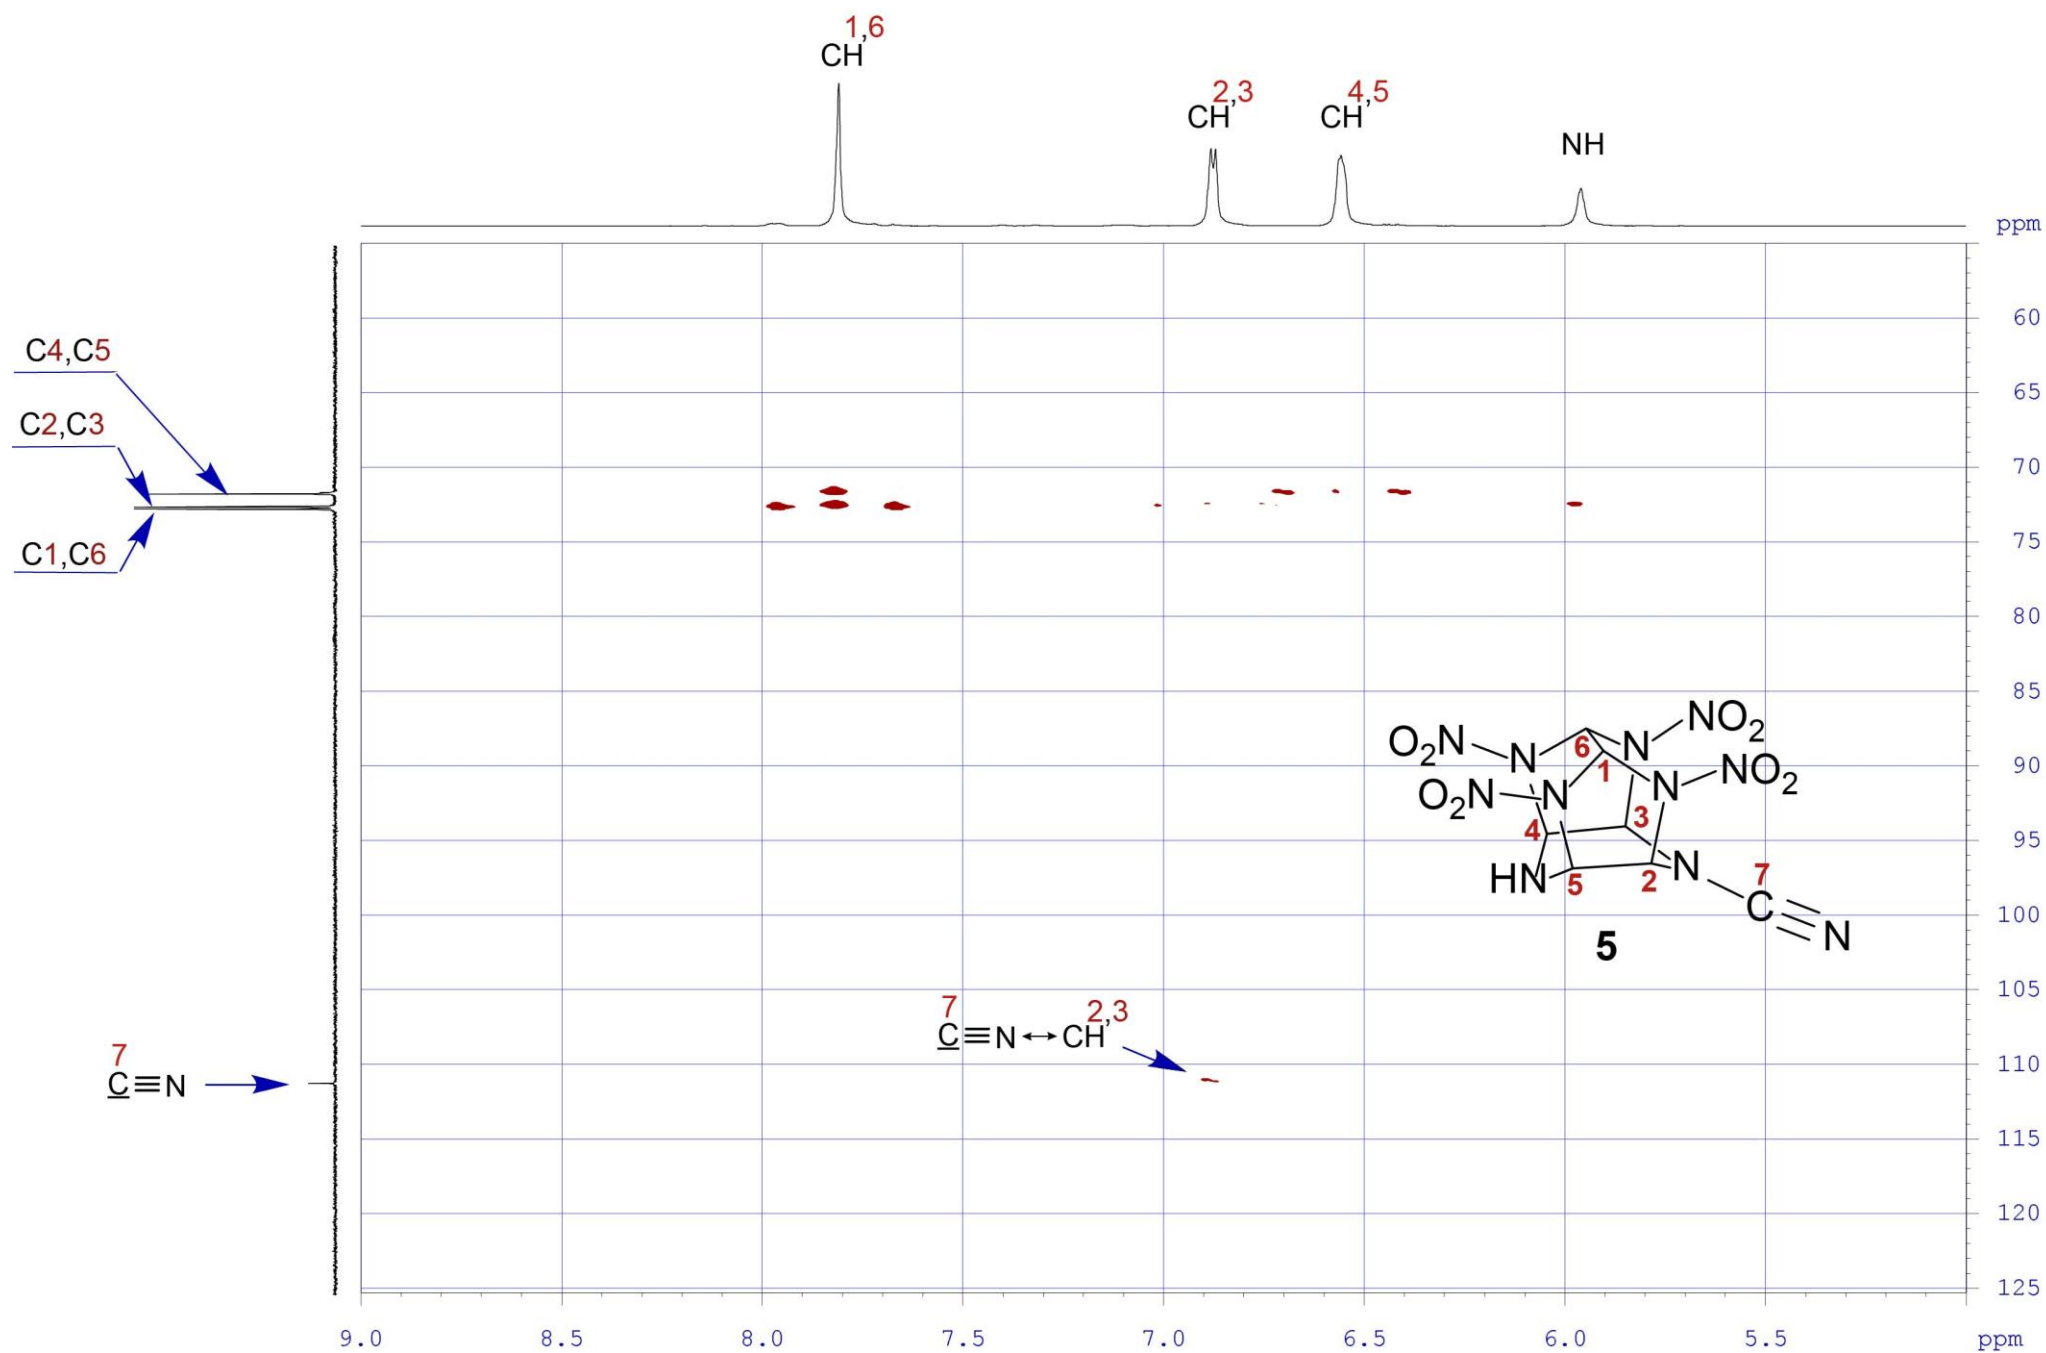

**$^{14}\text{N}$  NMR (43.37 MHz,  $[\text{D}_6]$ acetone) spectrum of compound 5**

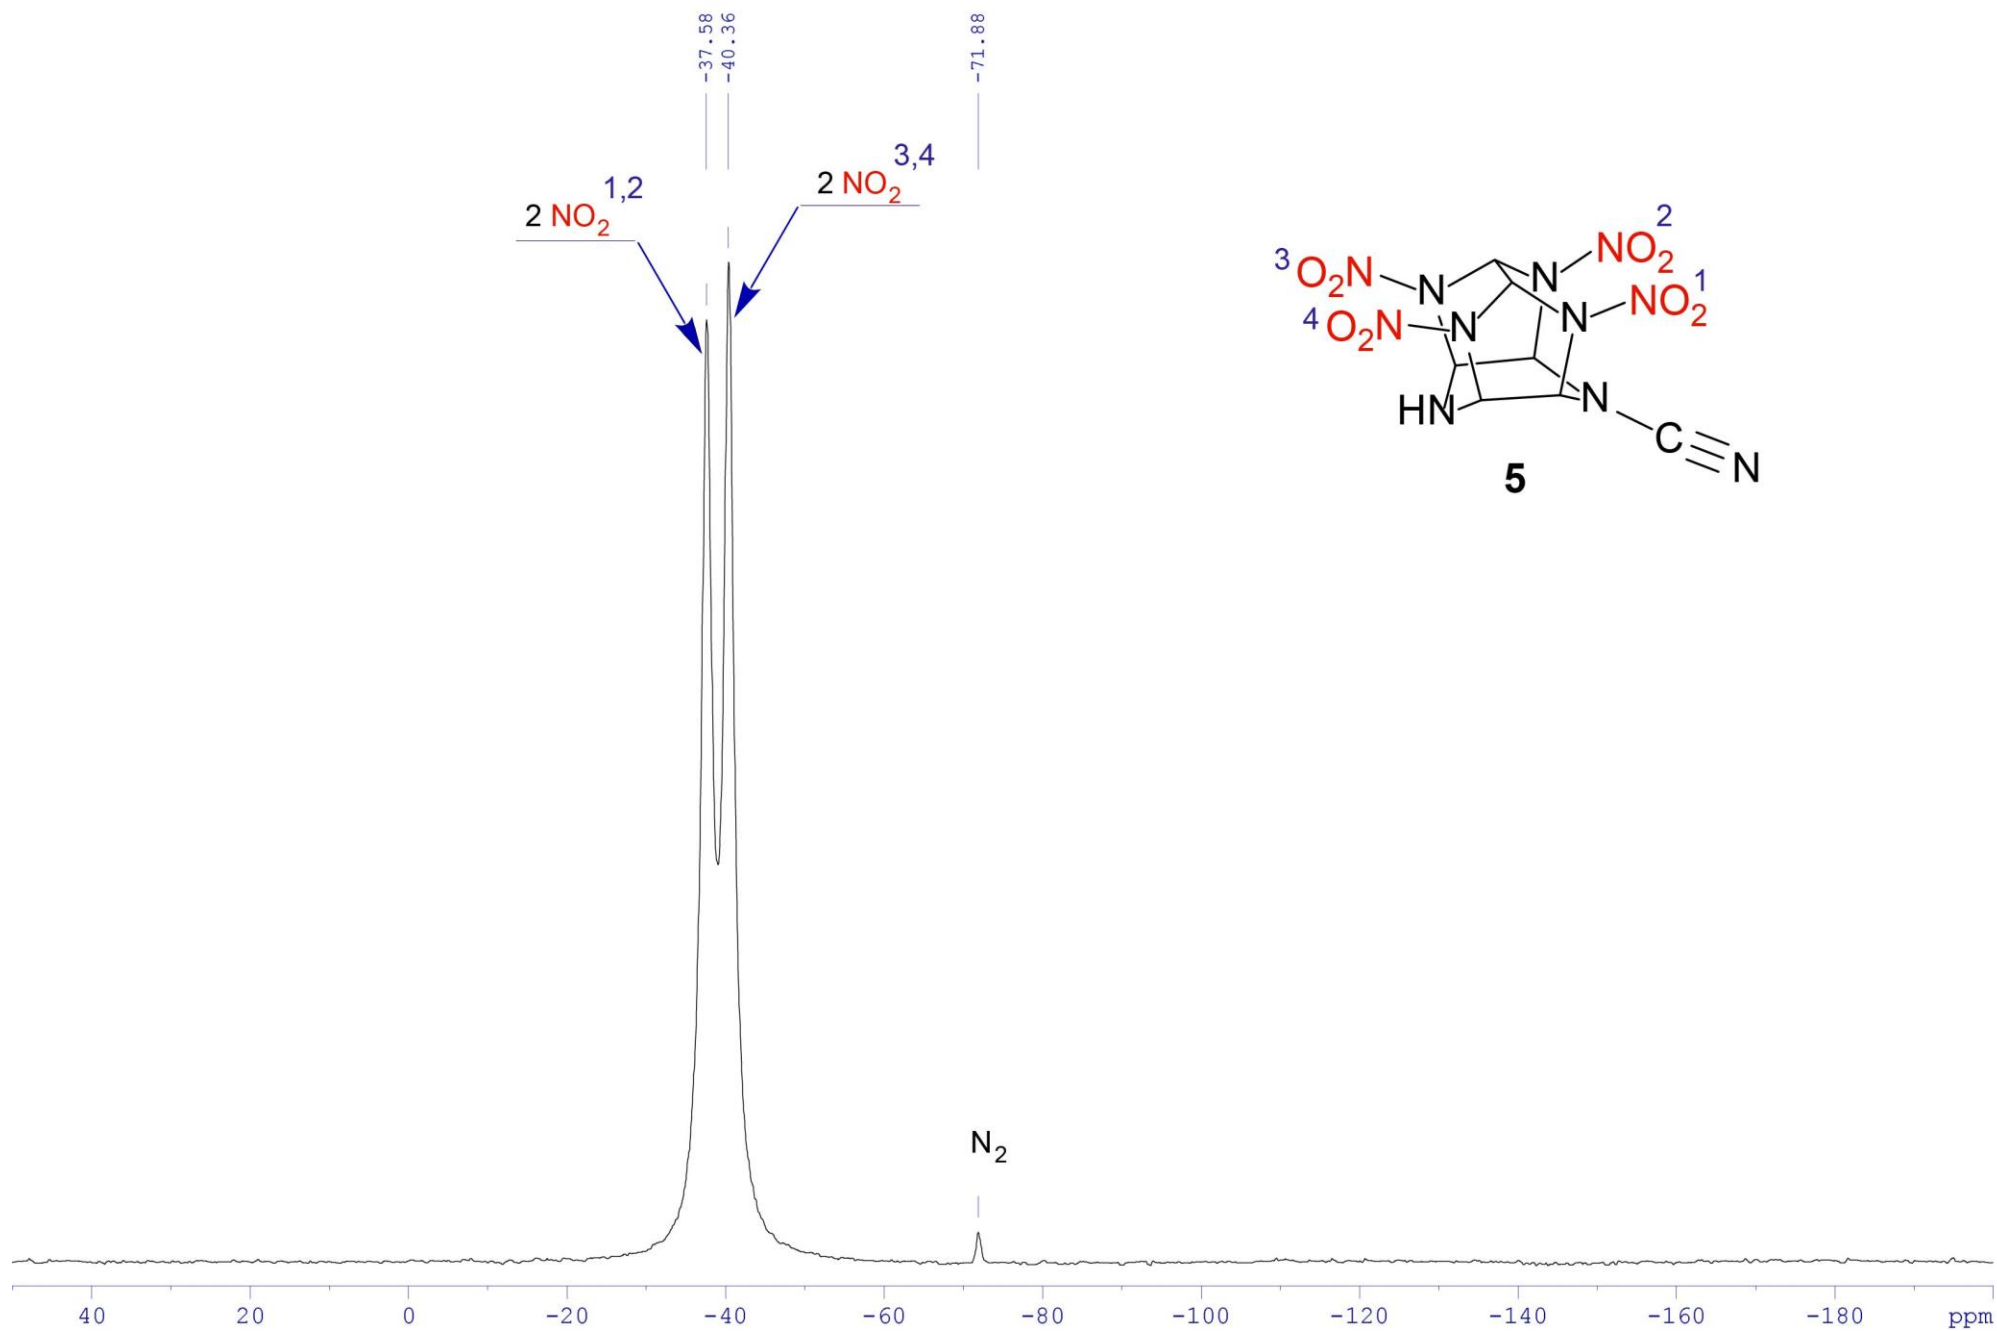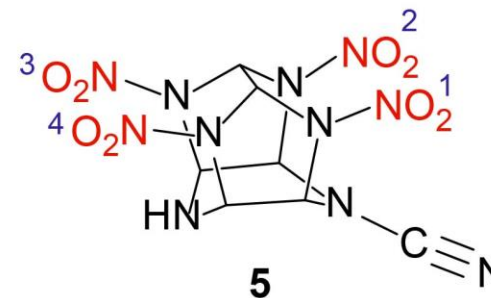

**$^{15}\text{N}$  NMR ([INVGATED], [INEPT], 60.8 MHz,  $[\text{D}_6]$ acetone) spectrum of compound 5**

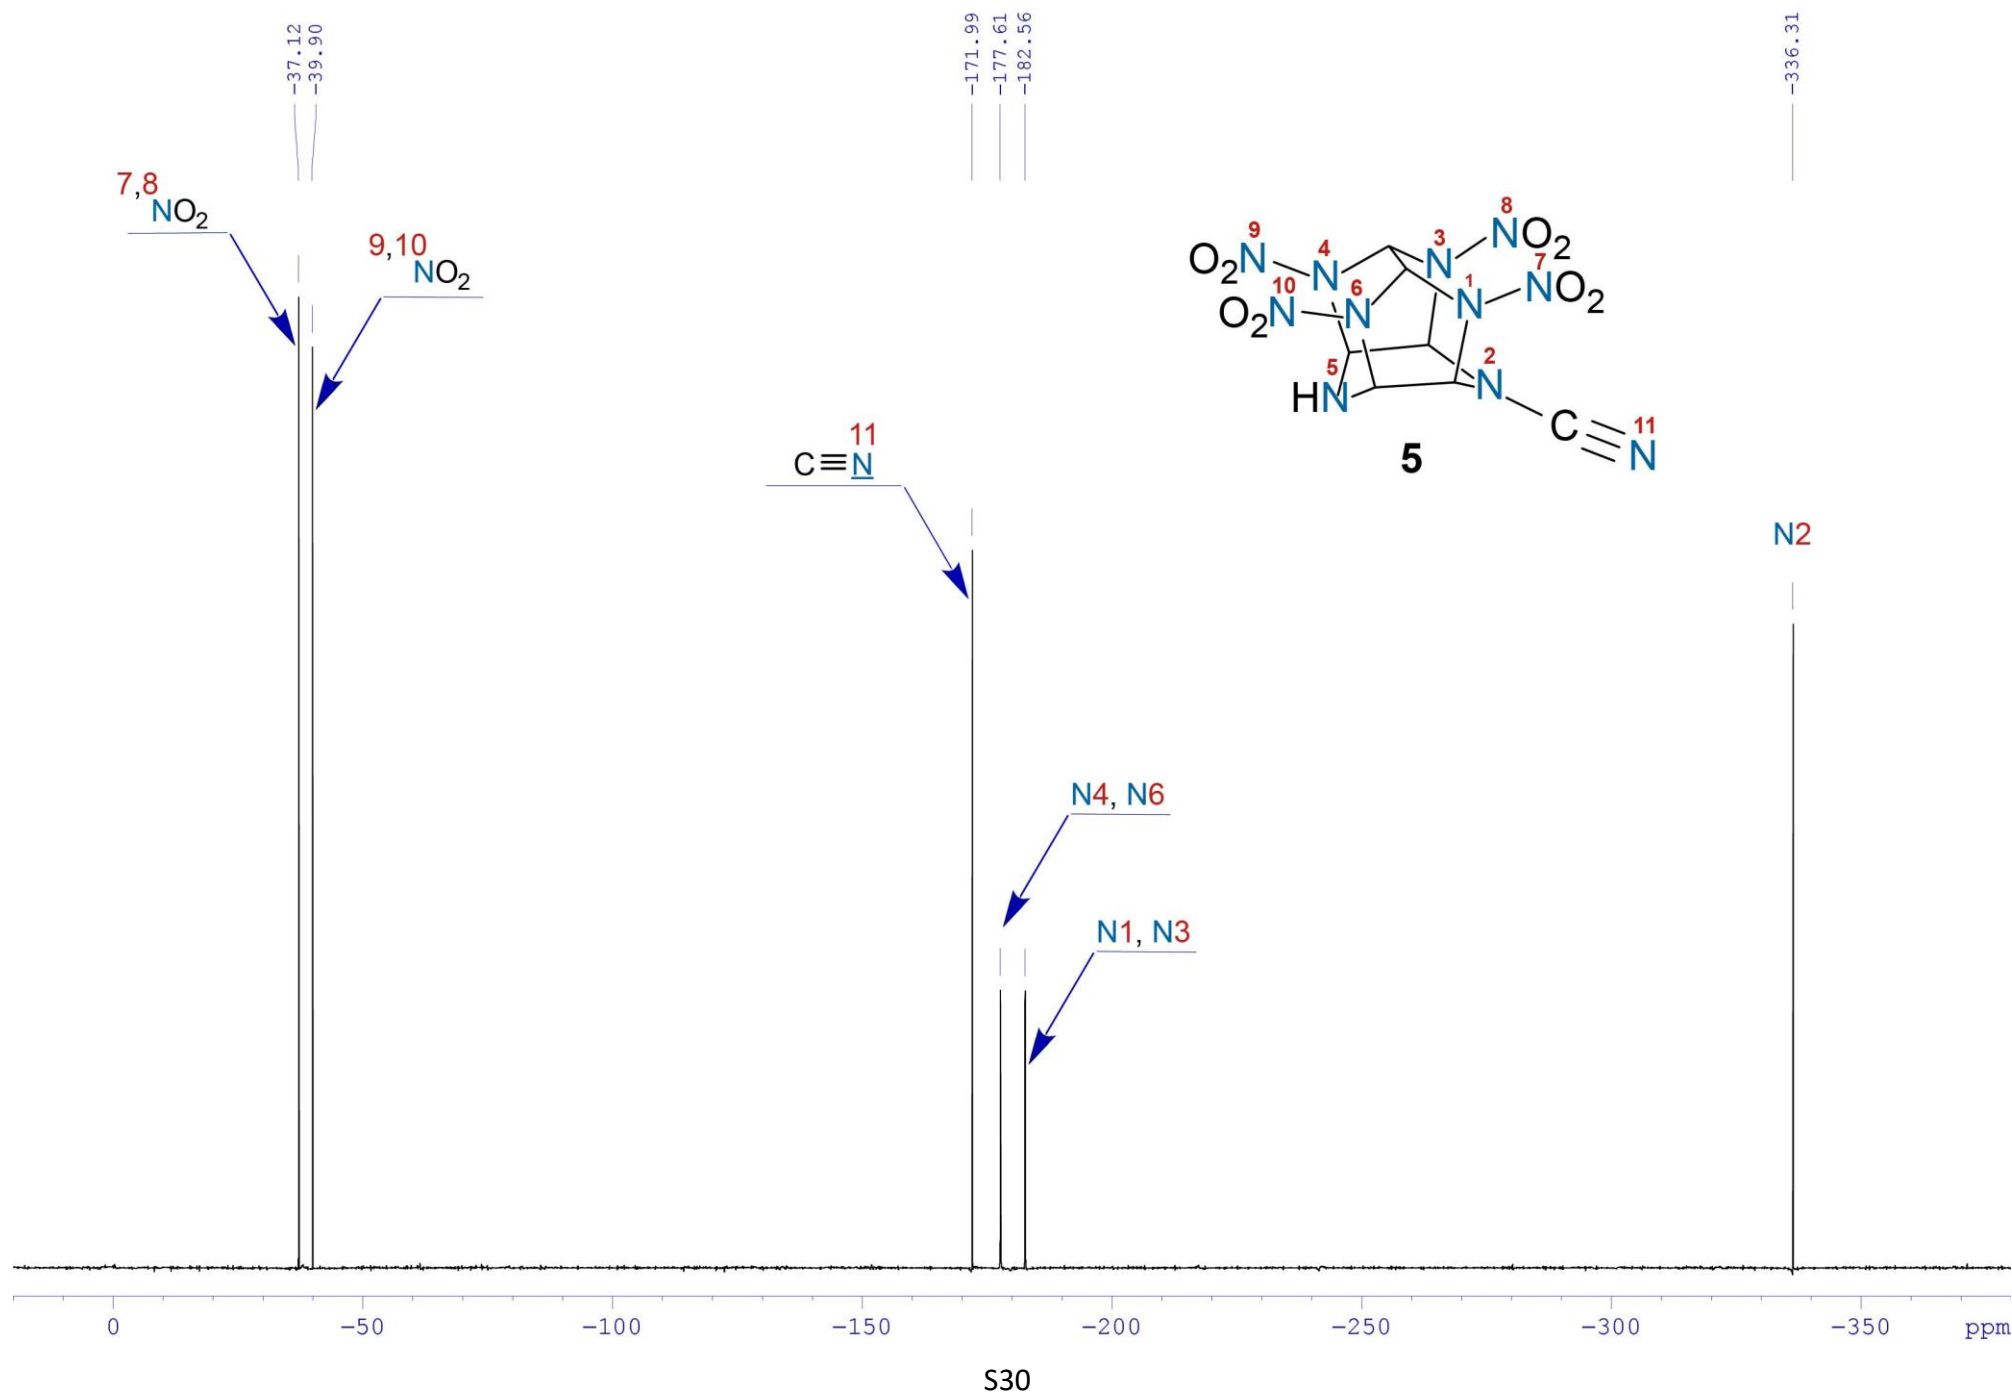

**$\{^1\text{H}-^{15}\text{N}\}$  HMBC NMR (600.13 MHz,  $[\text{D}_6]\text{acetone}$ ) spectrum of compound 5**

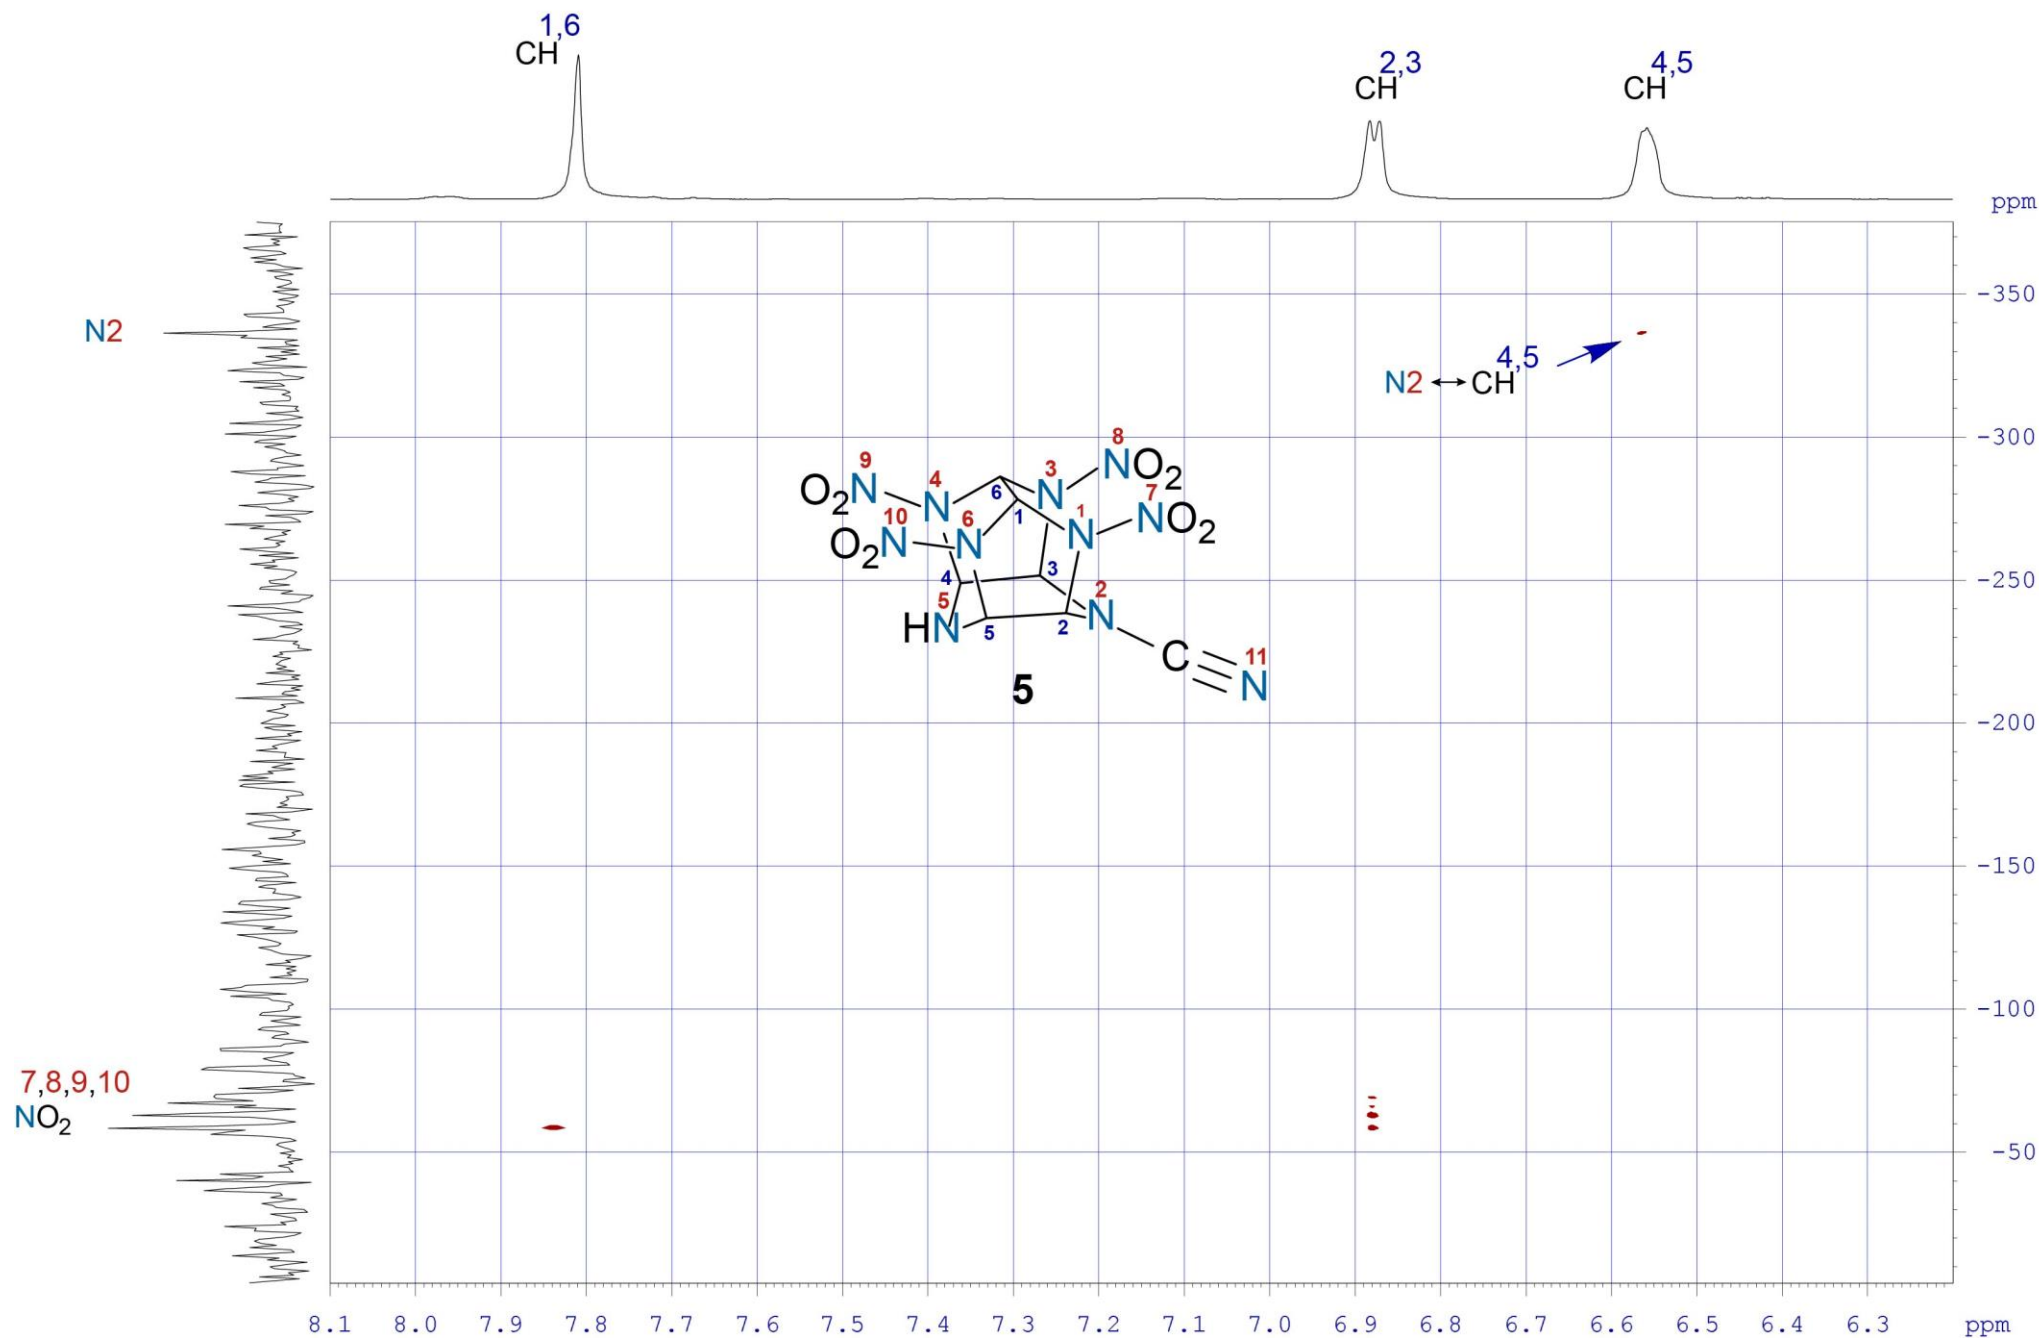

# IR (KBr) spectrum of compound 5

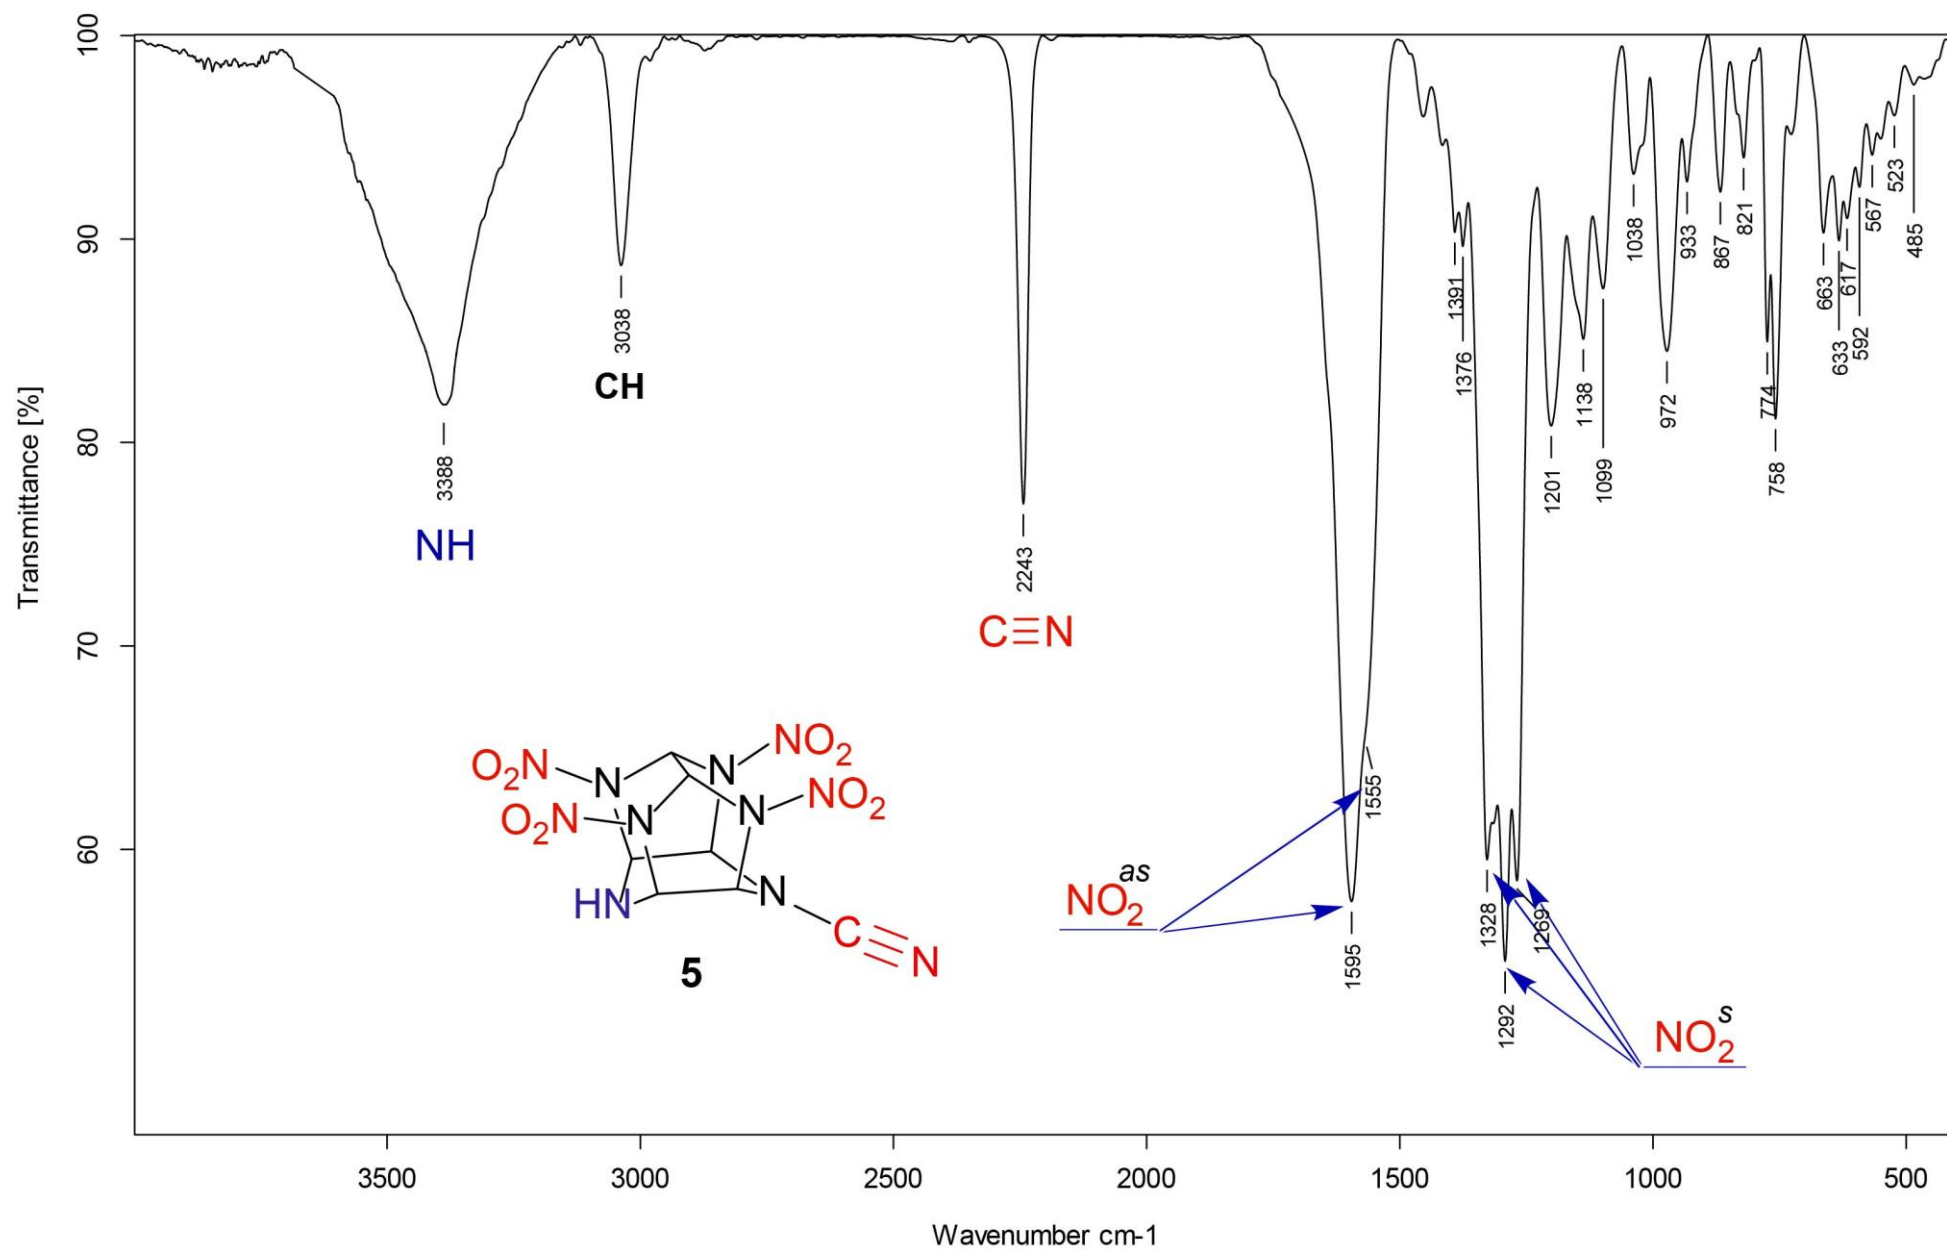

## HRMS (ESI) for compound 5

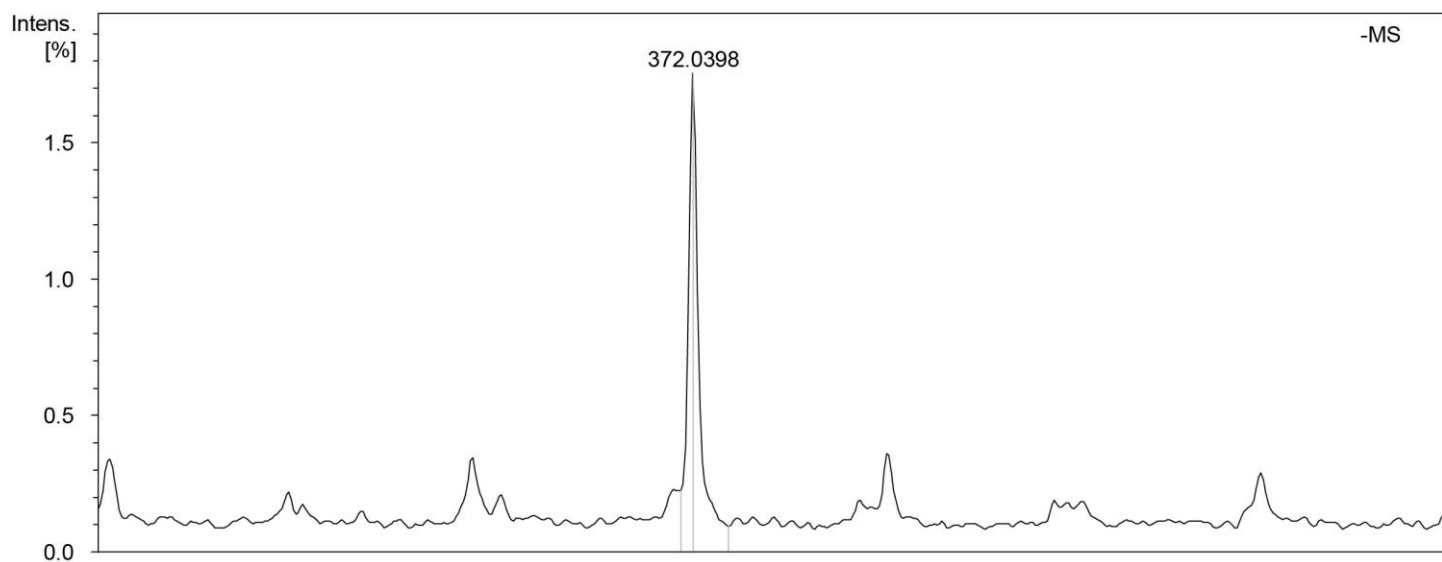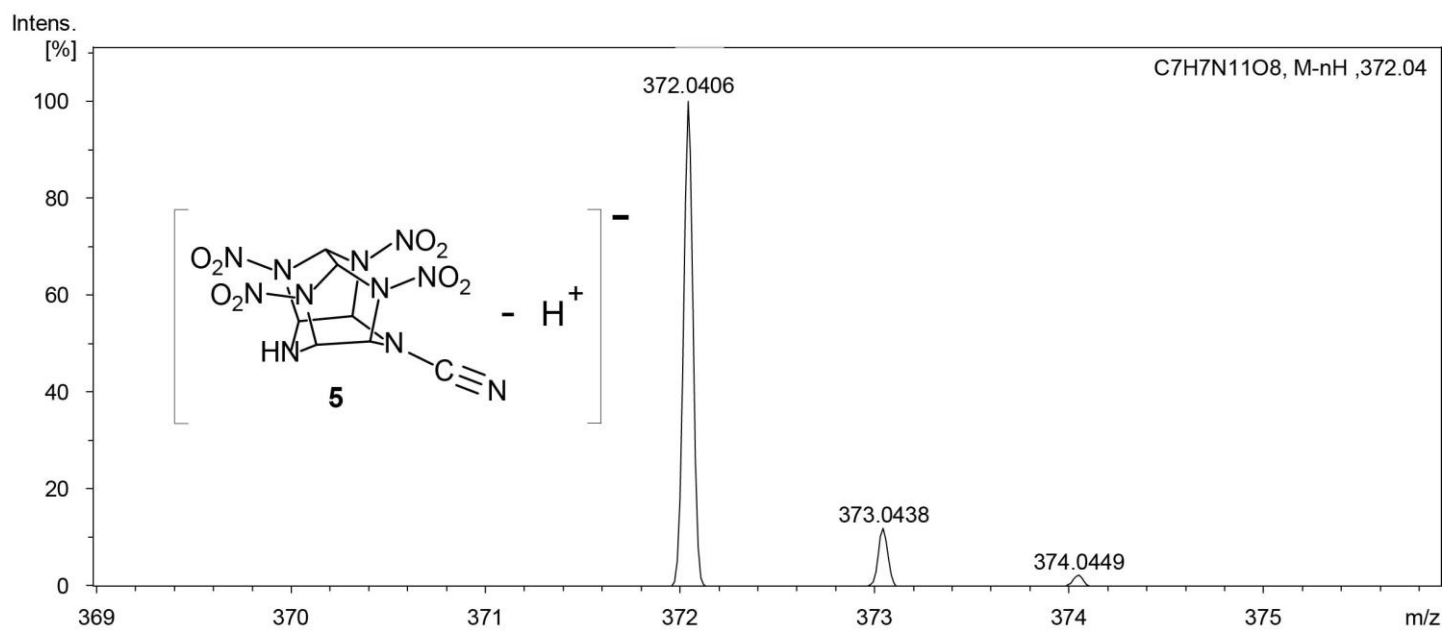

# <sup>1</sup>H NMR (600.13 MHz, [D<sub>6</sub>]acetone) spectrum of compound 6

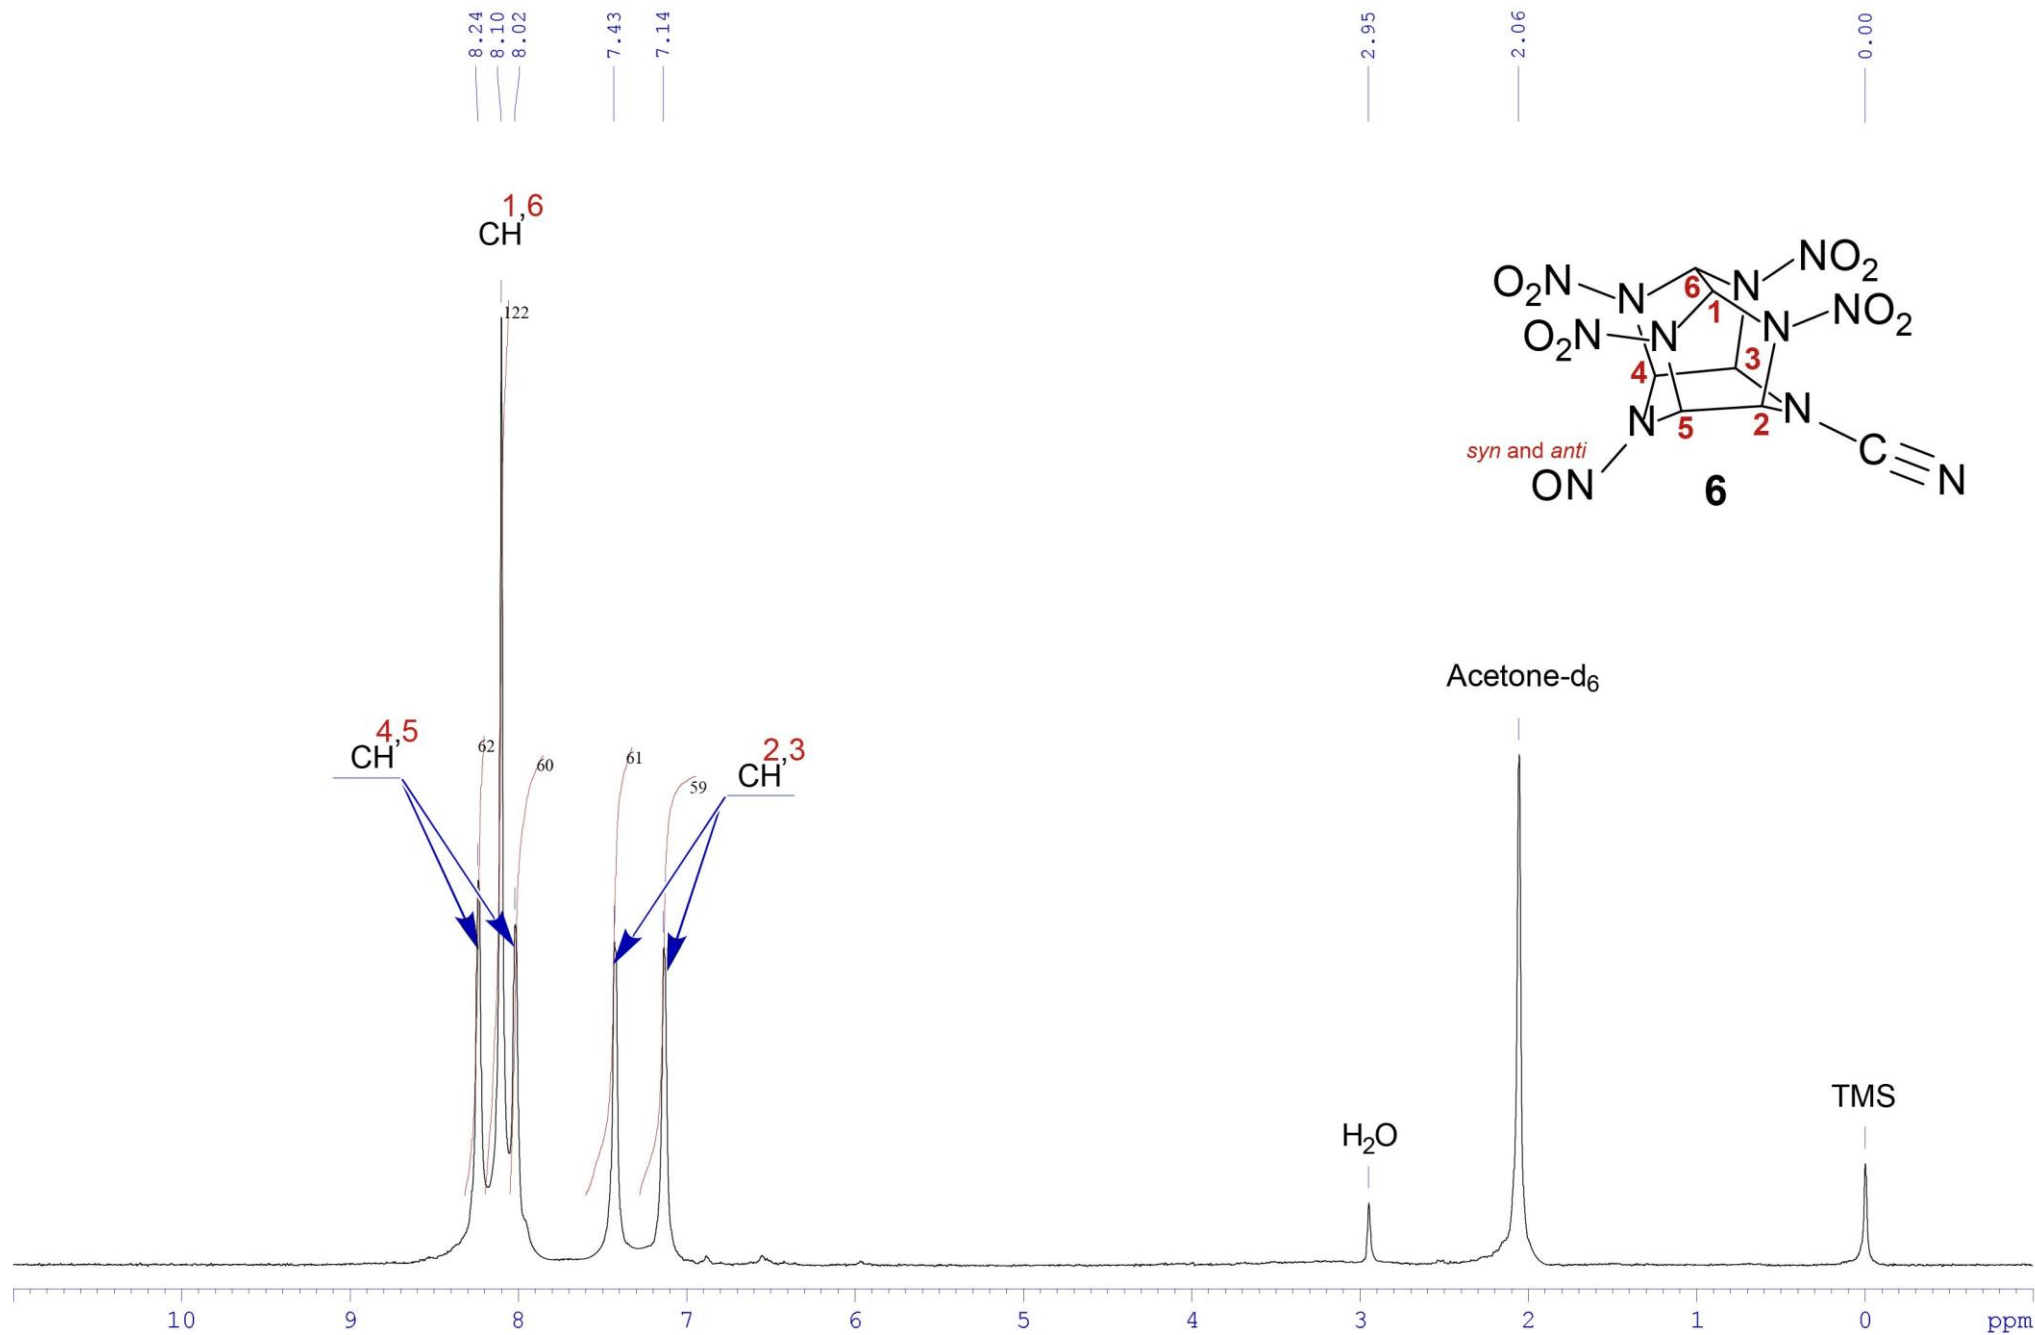

# $^{13}\text{C}$ NMR (150.9 MHz, $[\text{D}_6]$ acetone) spectrum of compound 6

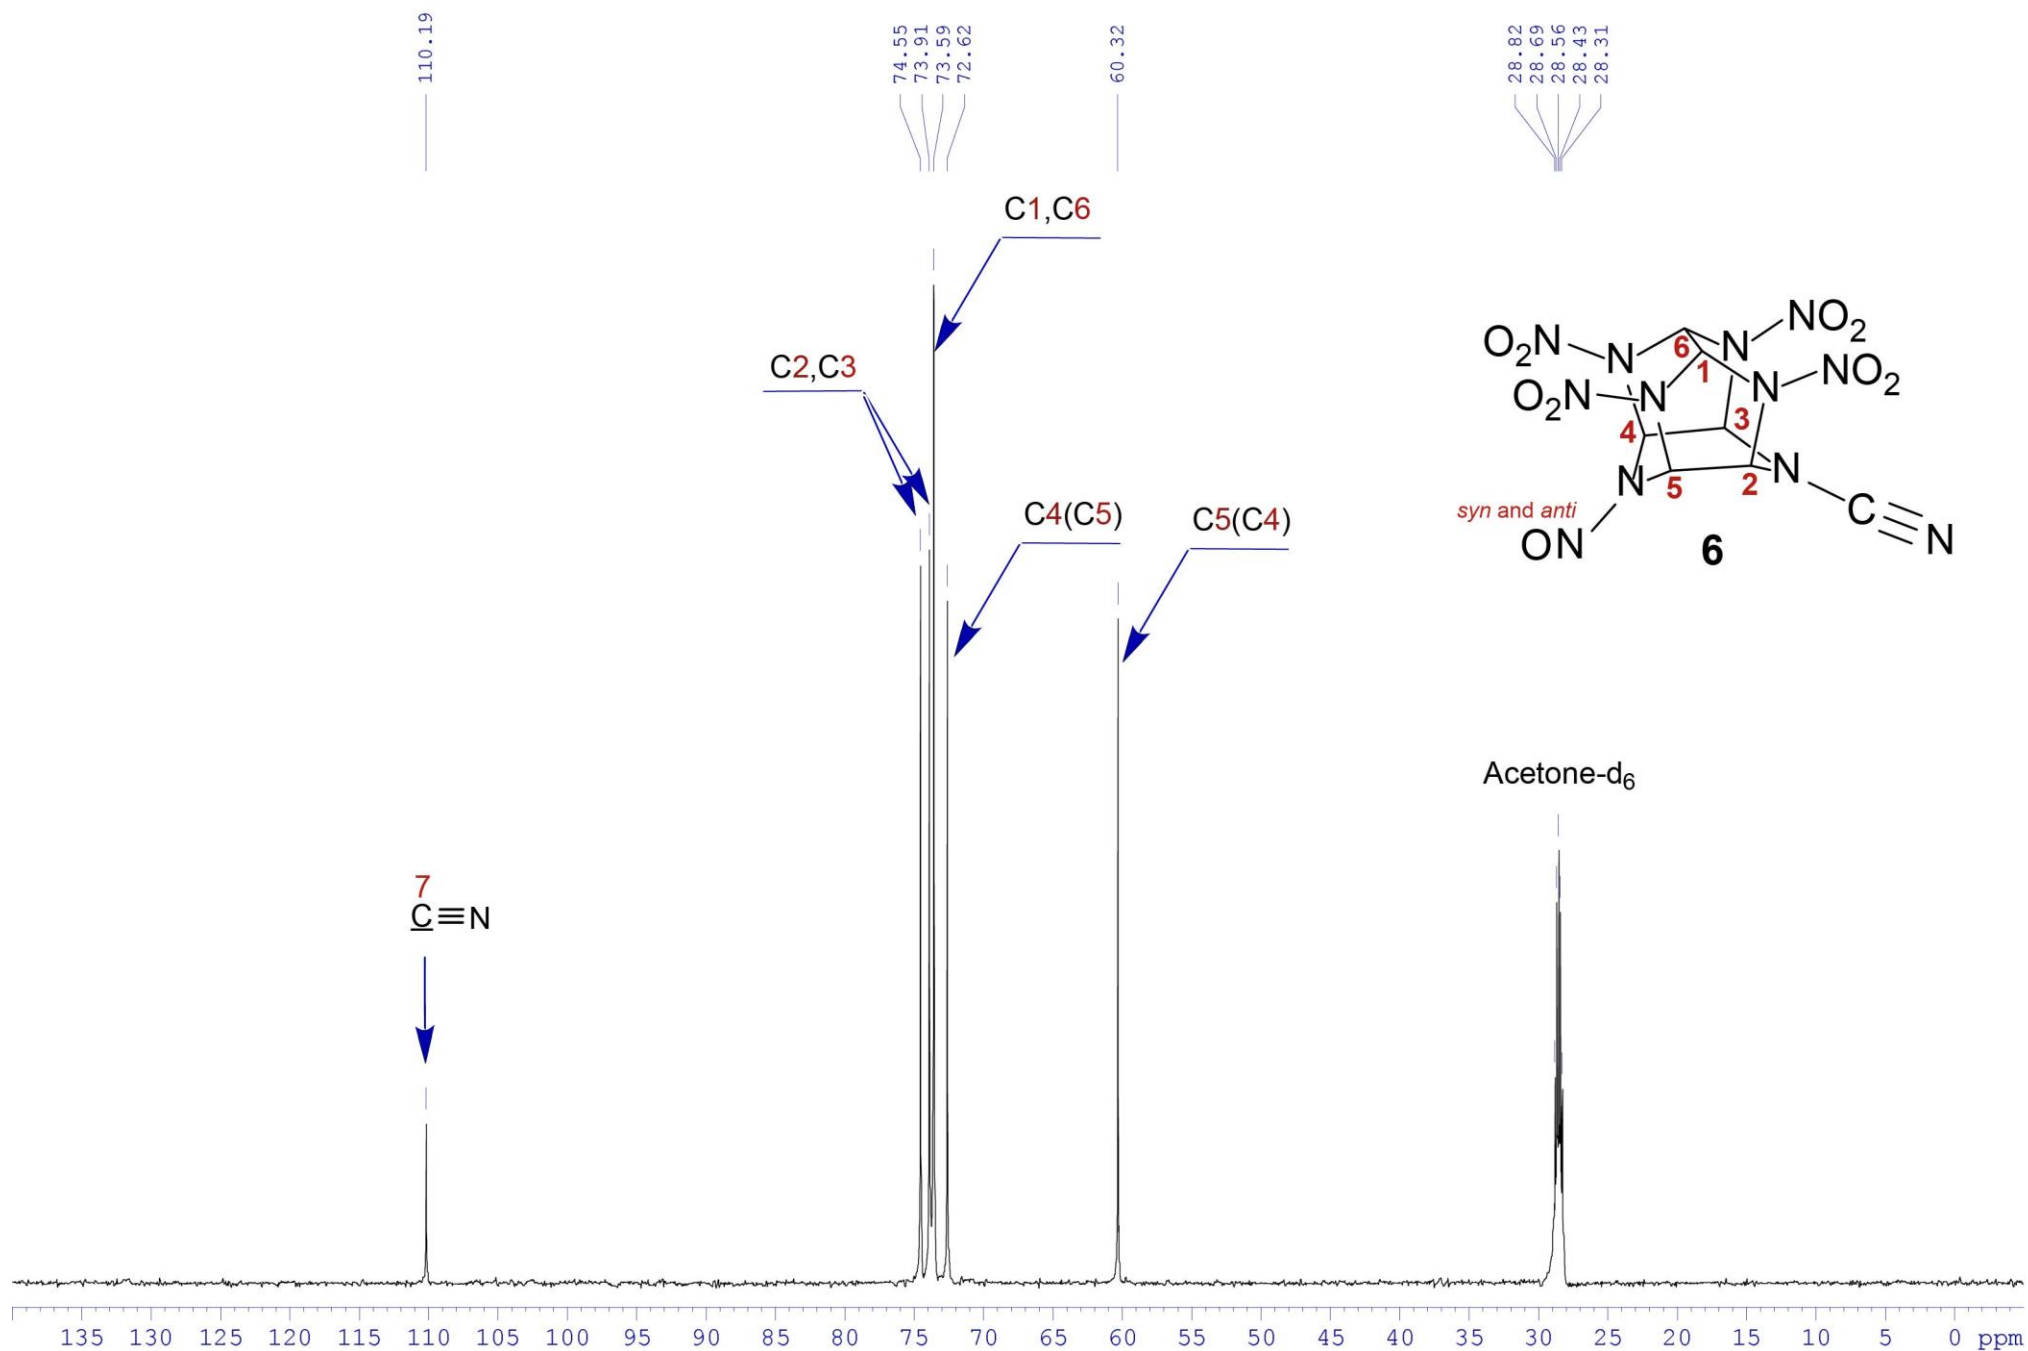

**$\{^1\text{H}-^{13}\text{C}\}$  HSQC NMR (600.13 MHz,  $[\text{D}_6]\text{acetone}$ ) spectrum of compound 6**

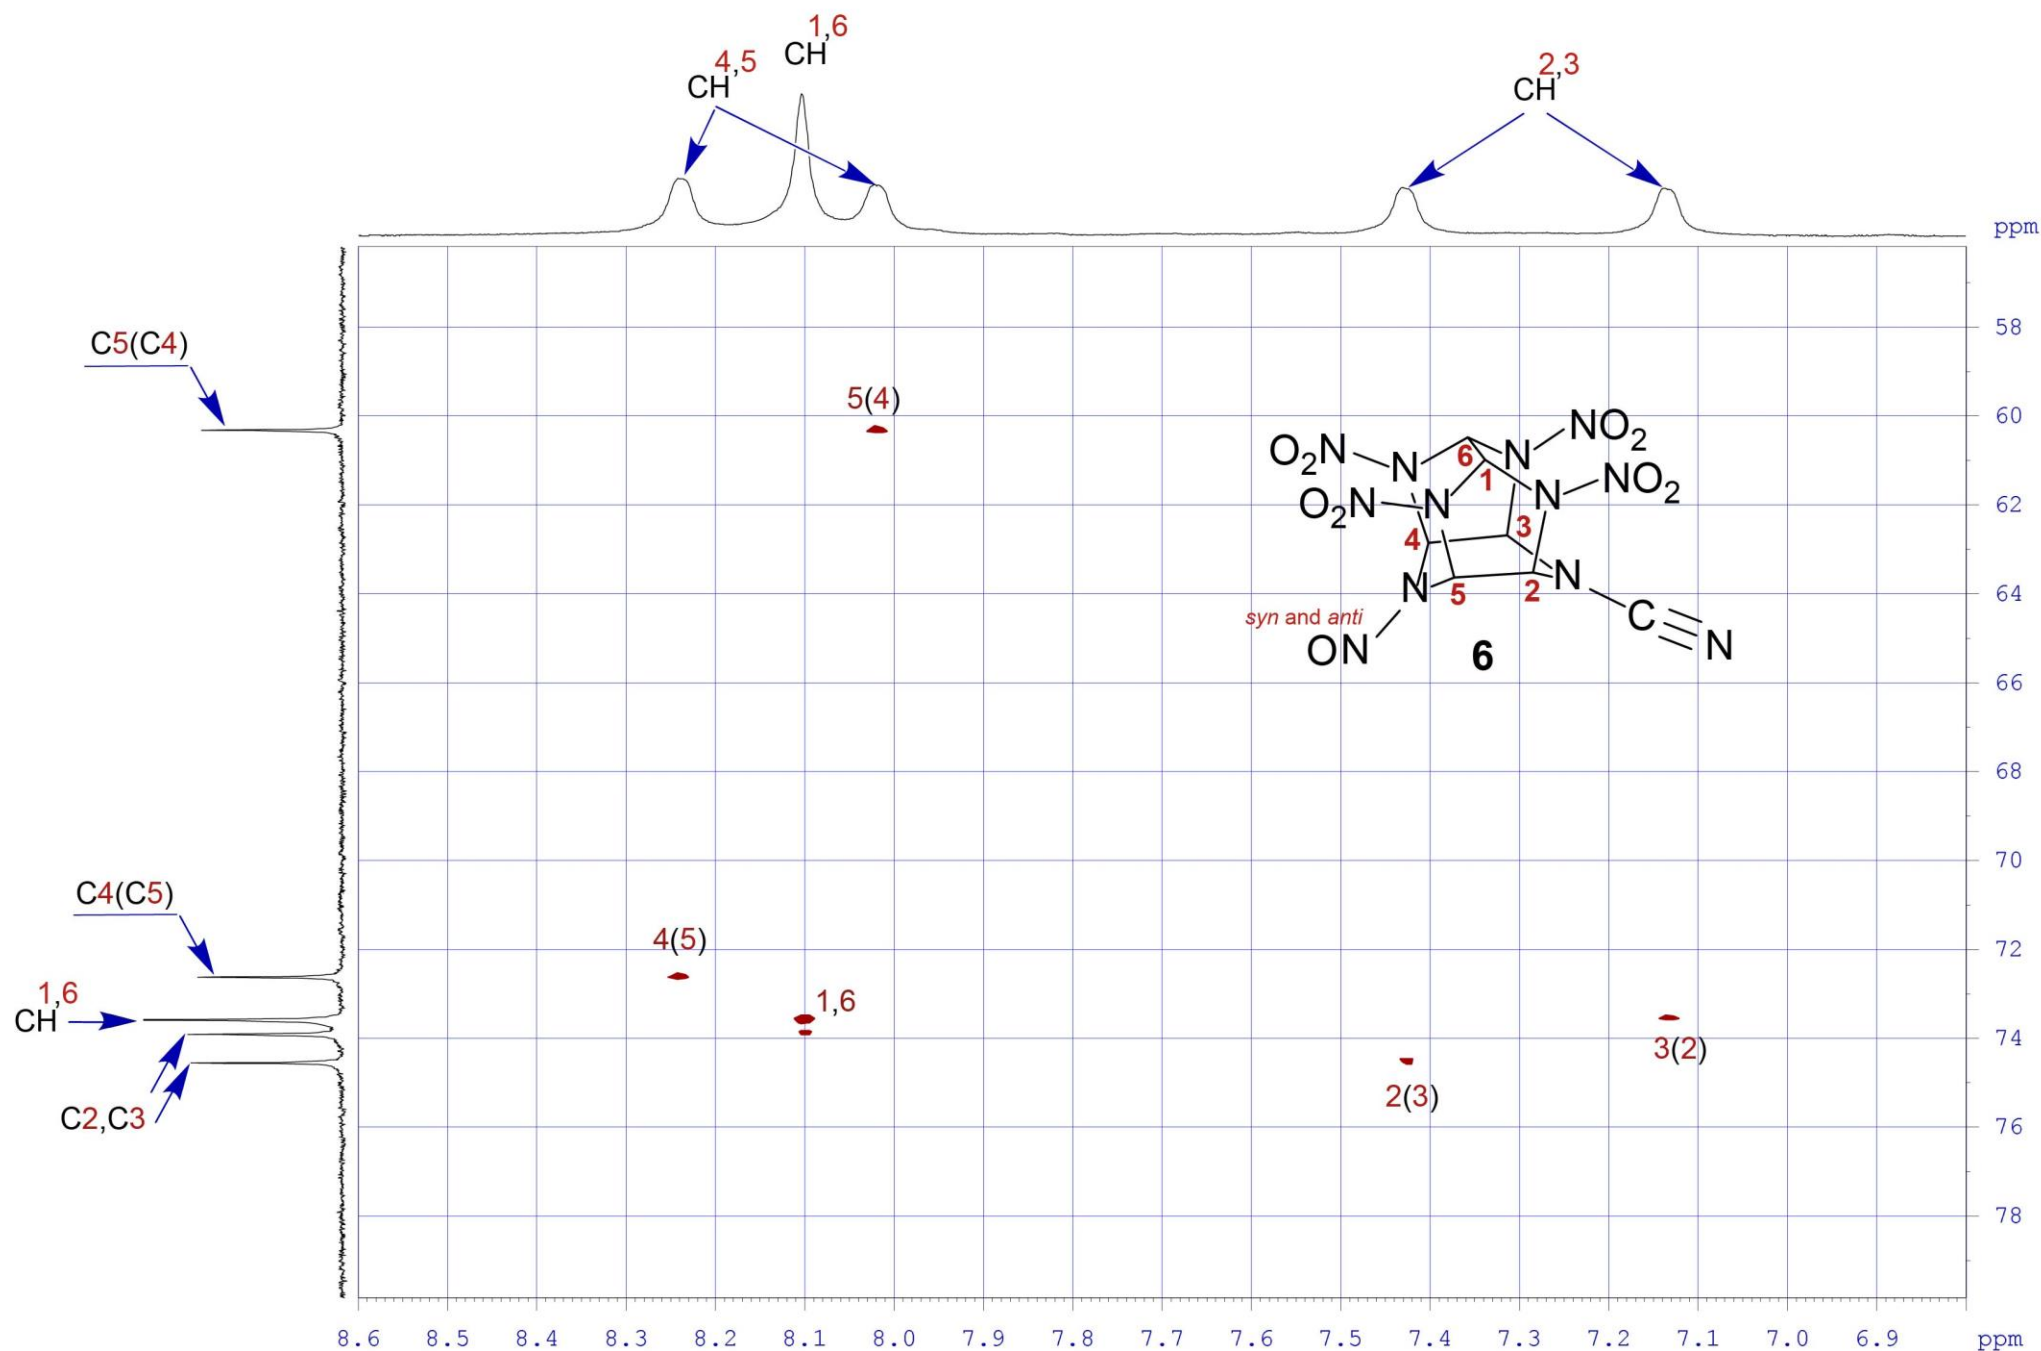

**{ $^1\text{H}$ - $^{13}\text{C}$ } HMBC NMR (600.13 MHz,  $[\text{D}_6]$ acetone) spectrum of compound 6**

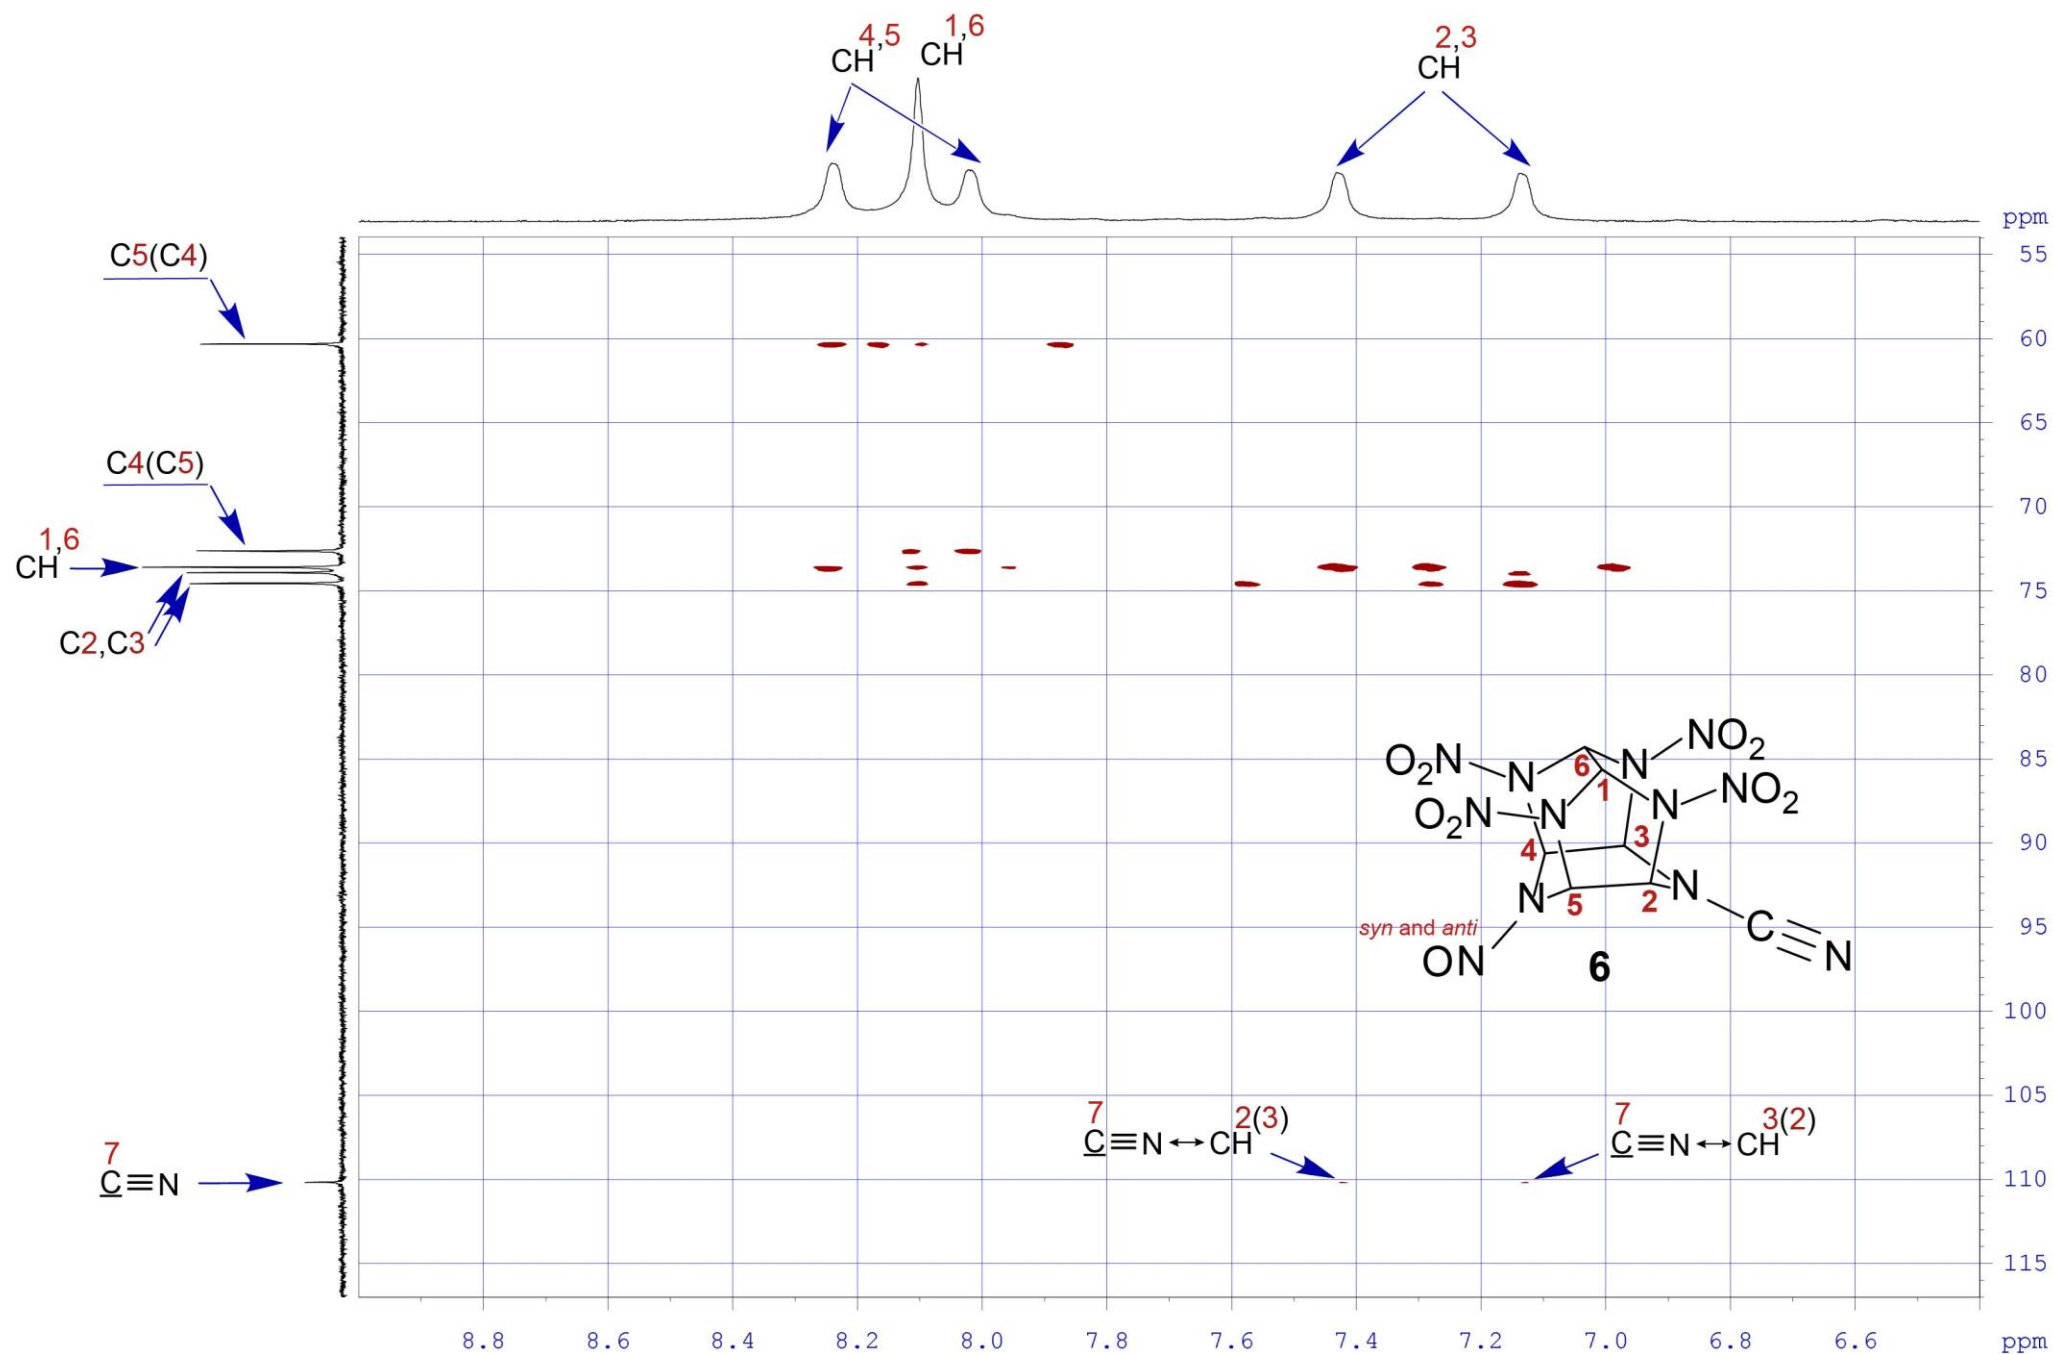

**$^{14}\text{N}$  NMR (43.37 MHz,  $[\text{D}_6]$ acetone) spectrum of compound 6**

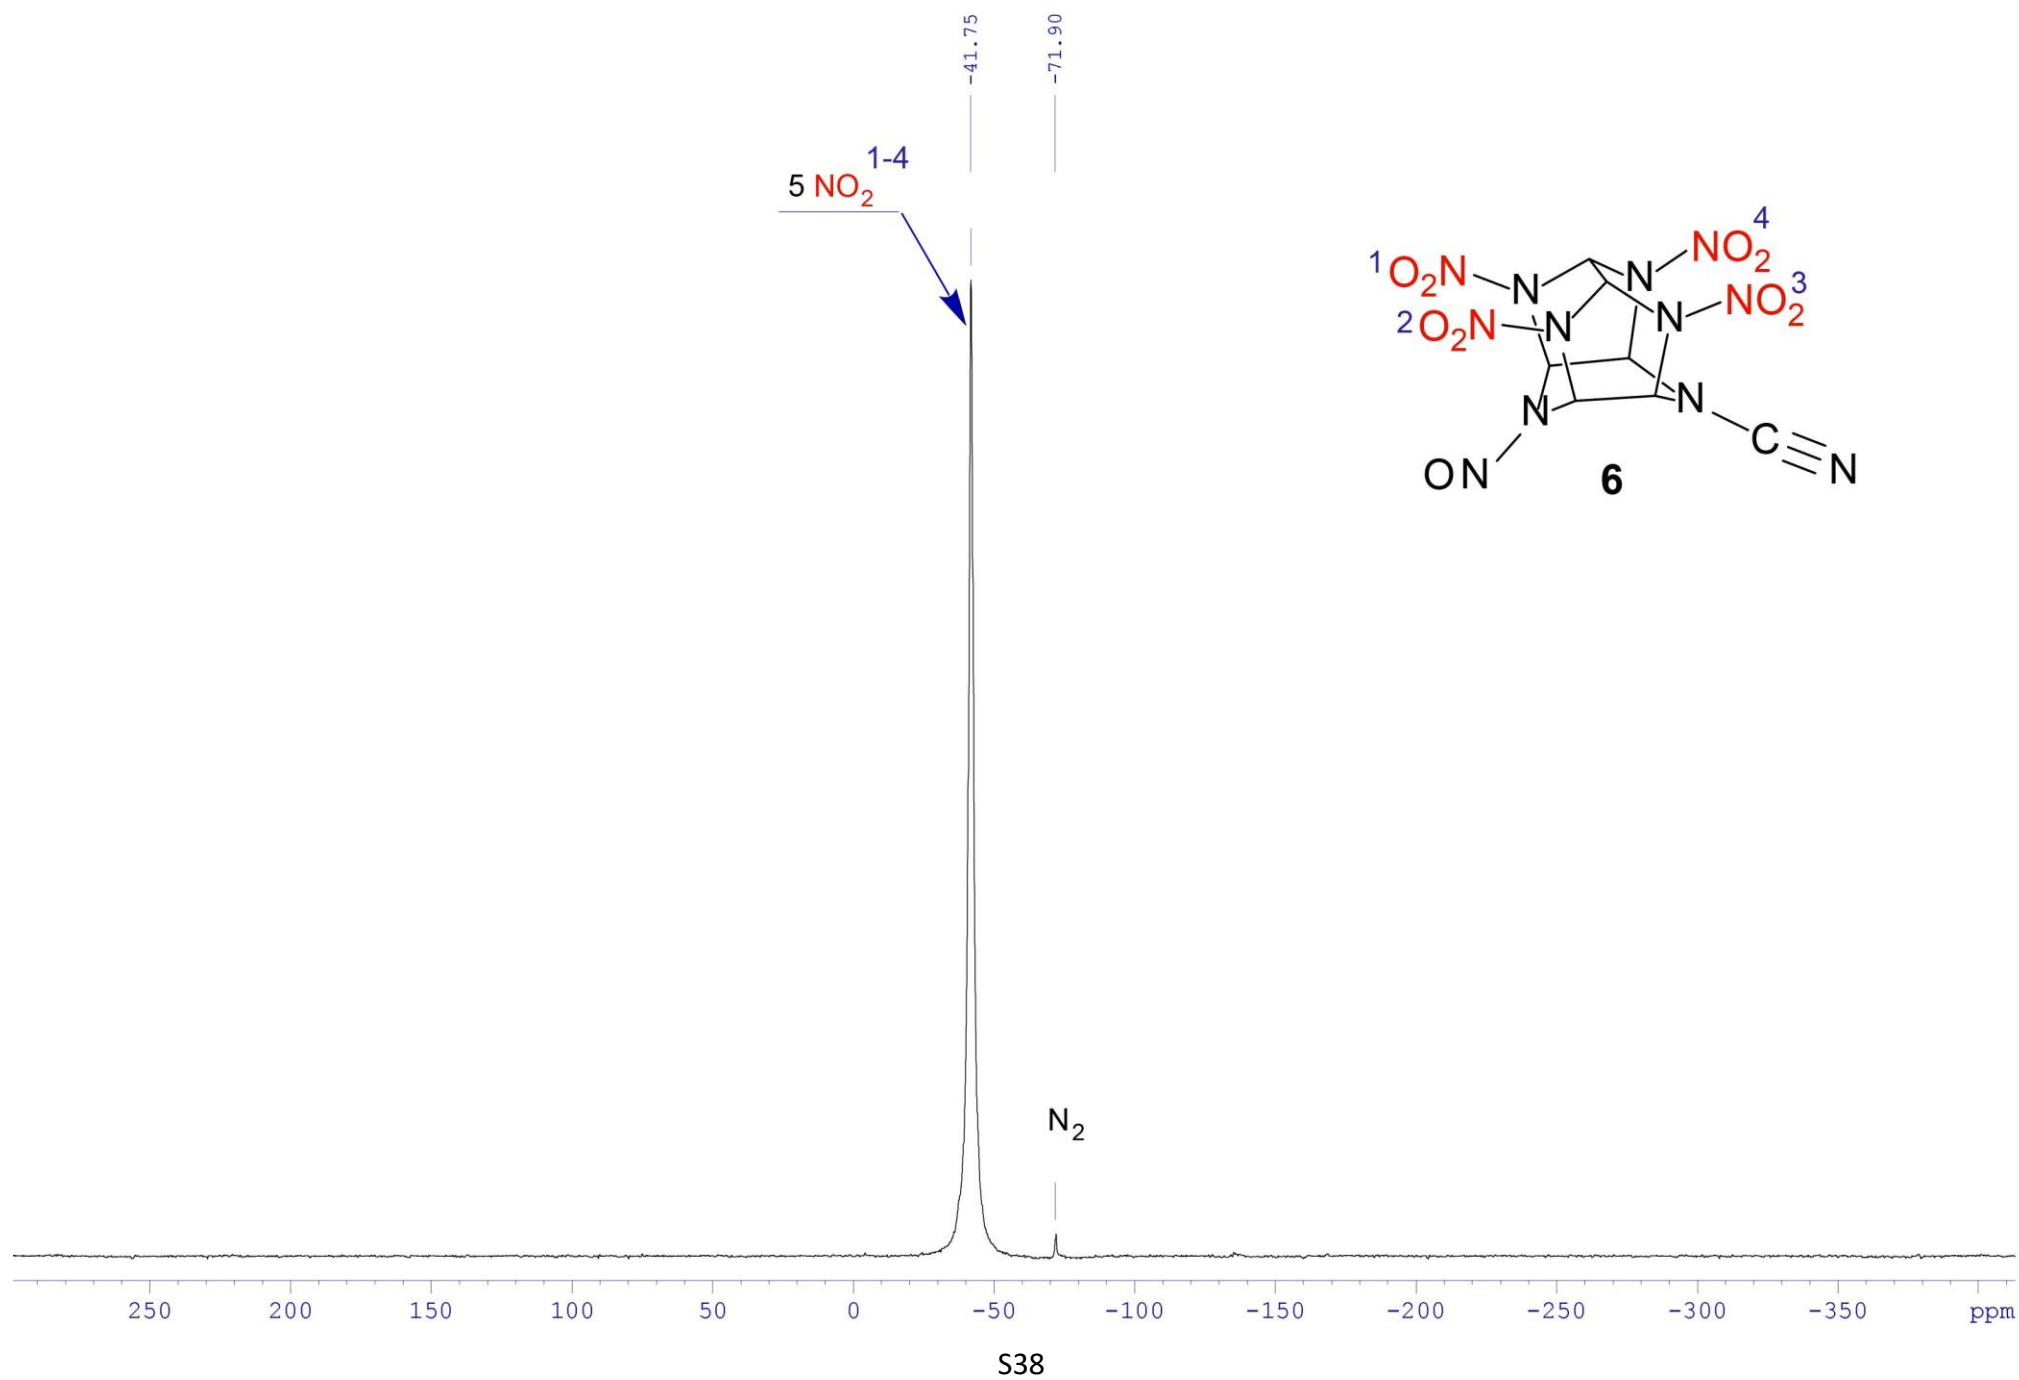

**$^{15}\text{N}$  NMR ([INVGATED], [INEPT], 60.8 MHz,  $[\text{D}_6]$ acetone) spectrum of compound 6**

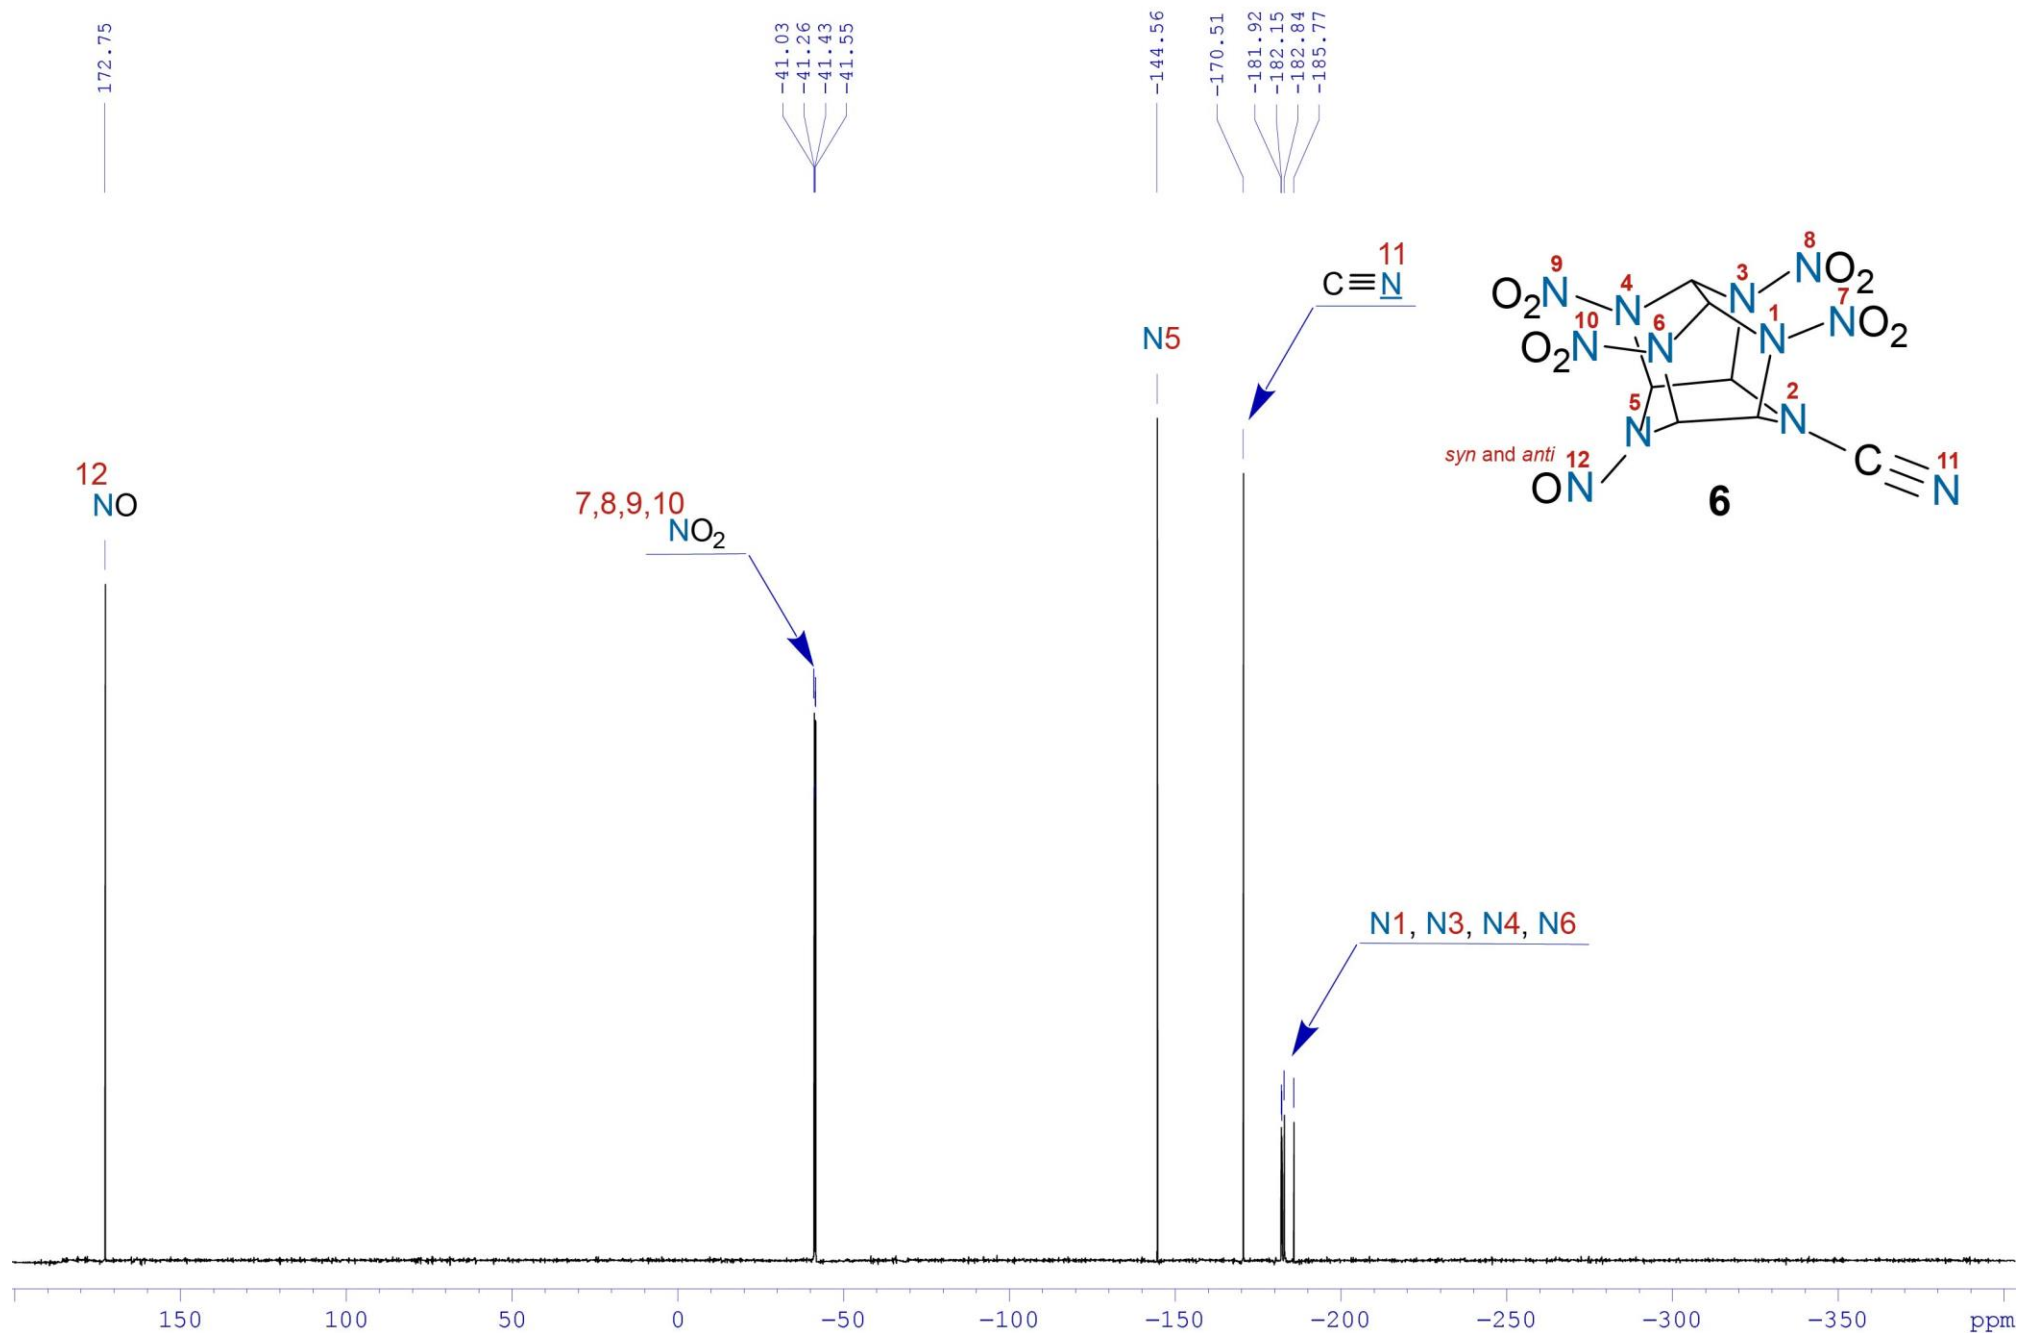

# IR (KBr) spectrum of compound 6

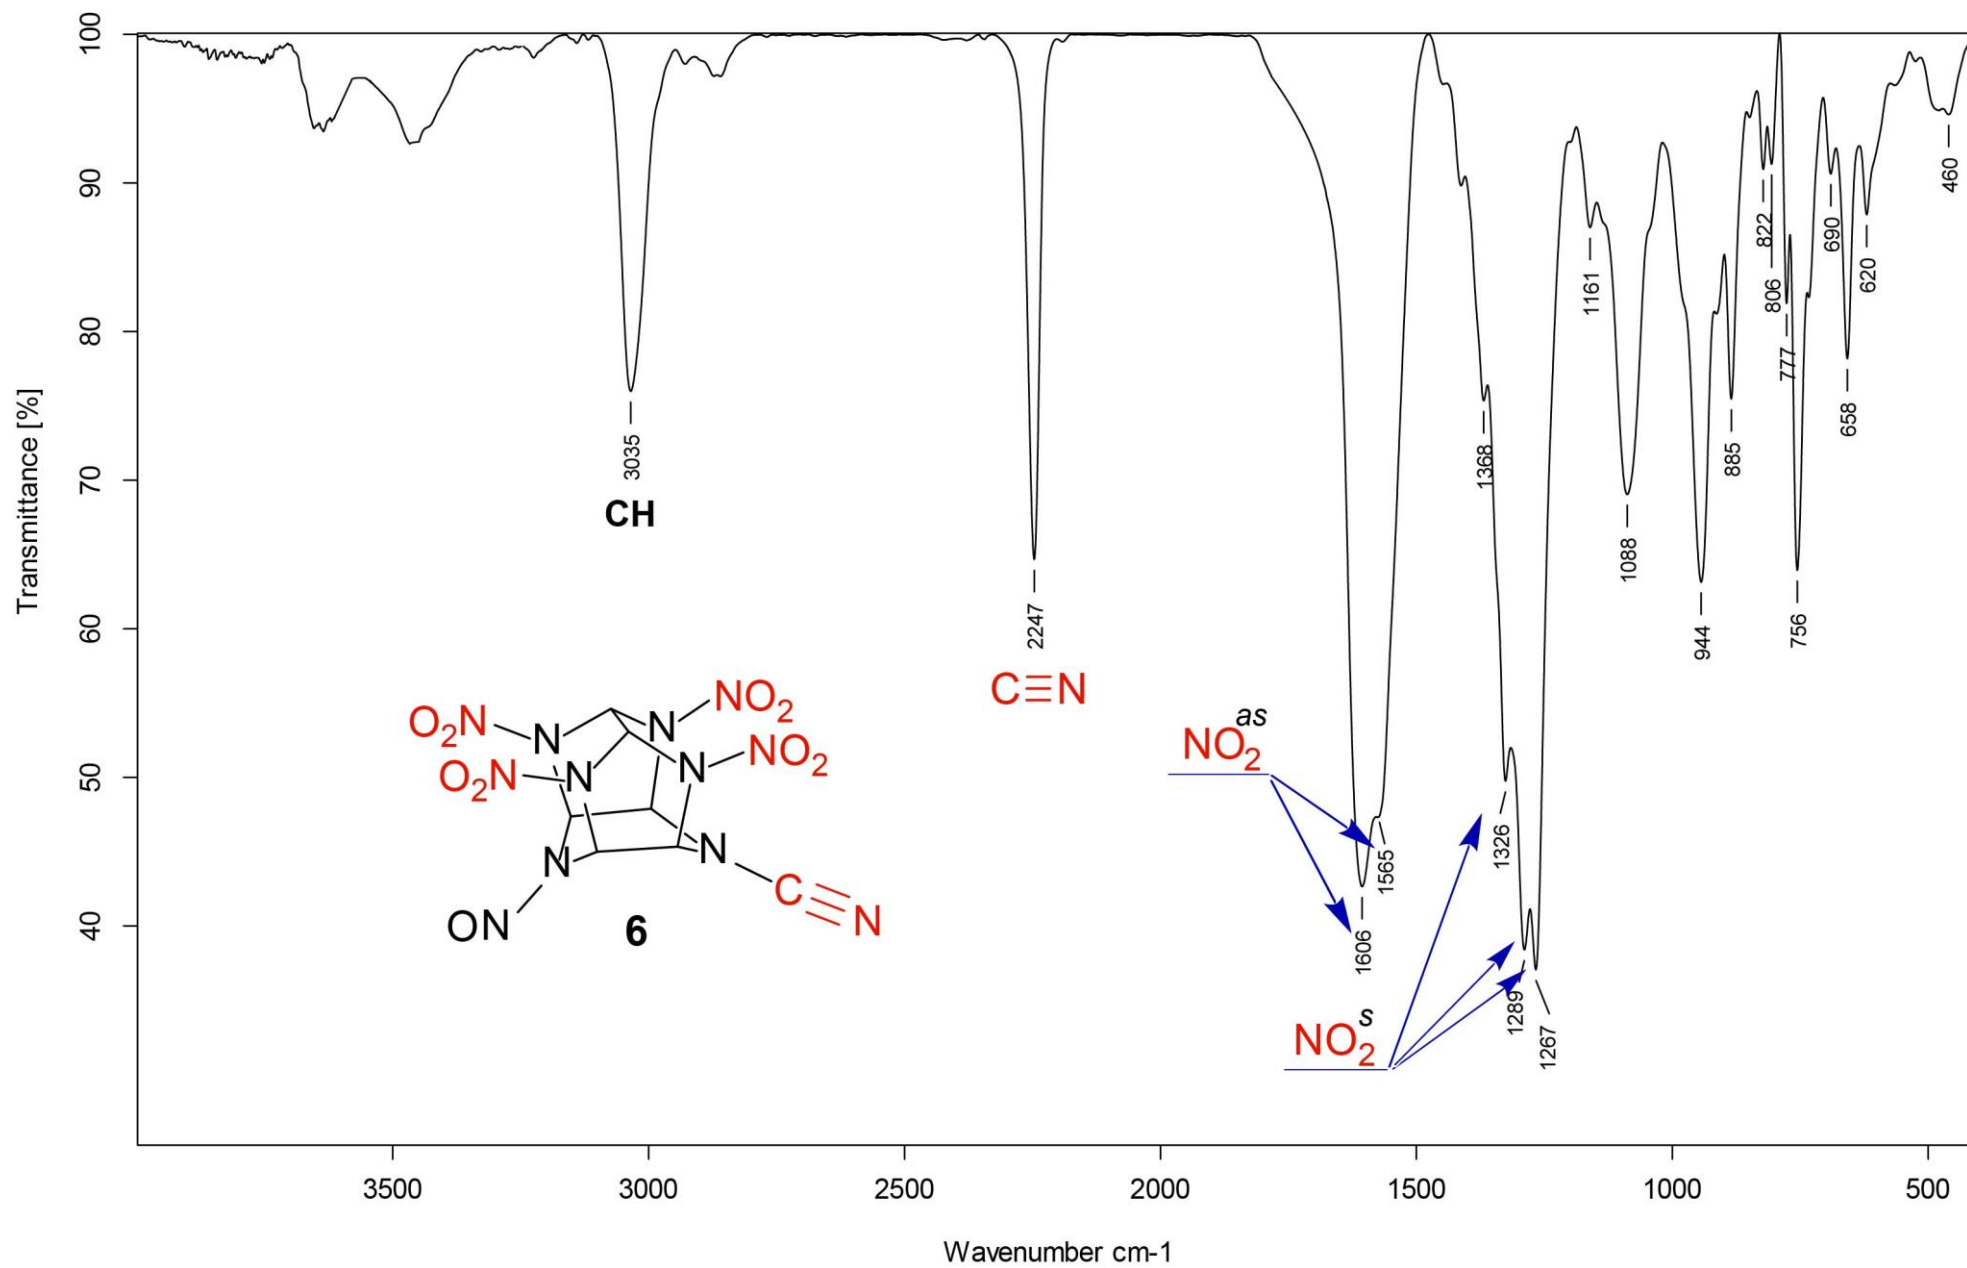

# $^1\text{H}$ NMR (300.1 MHz, $[\text{D}_6]\text{acetone}$ ) spectrum of compound 8

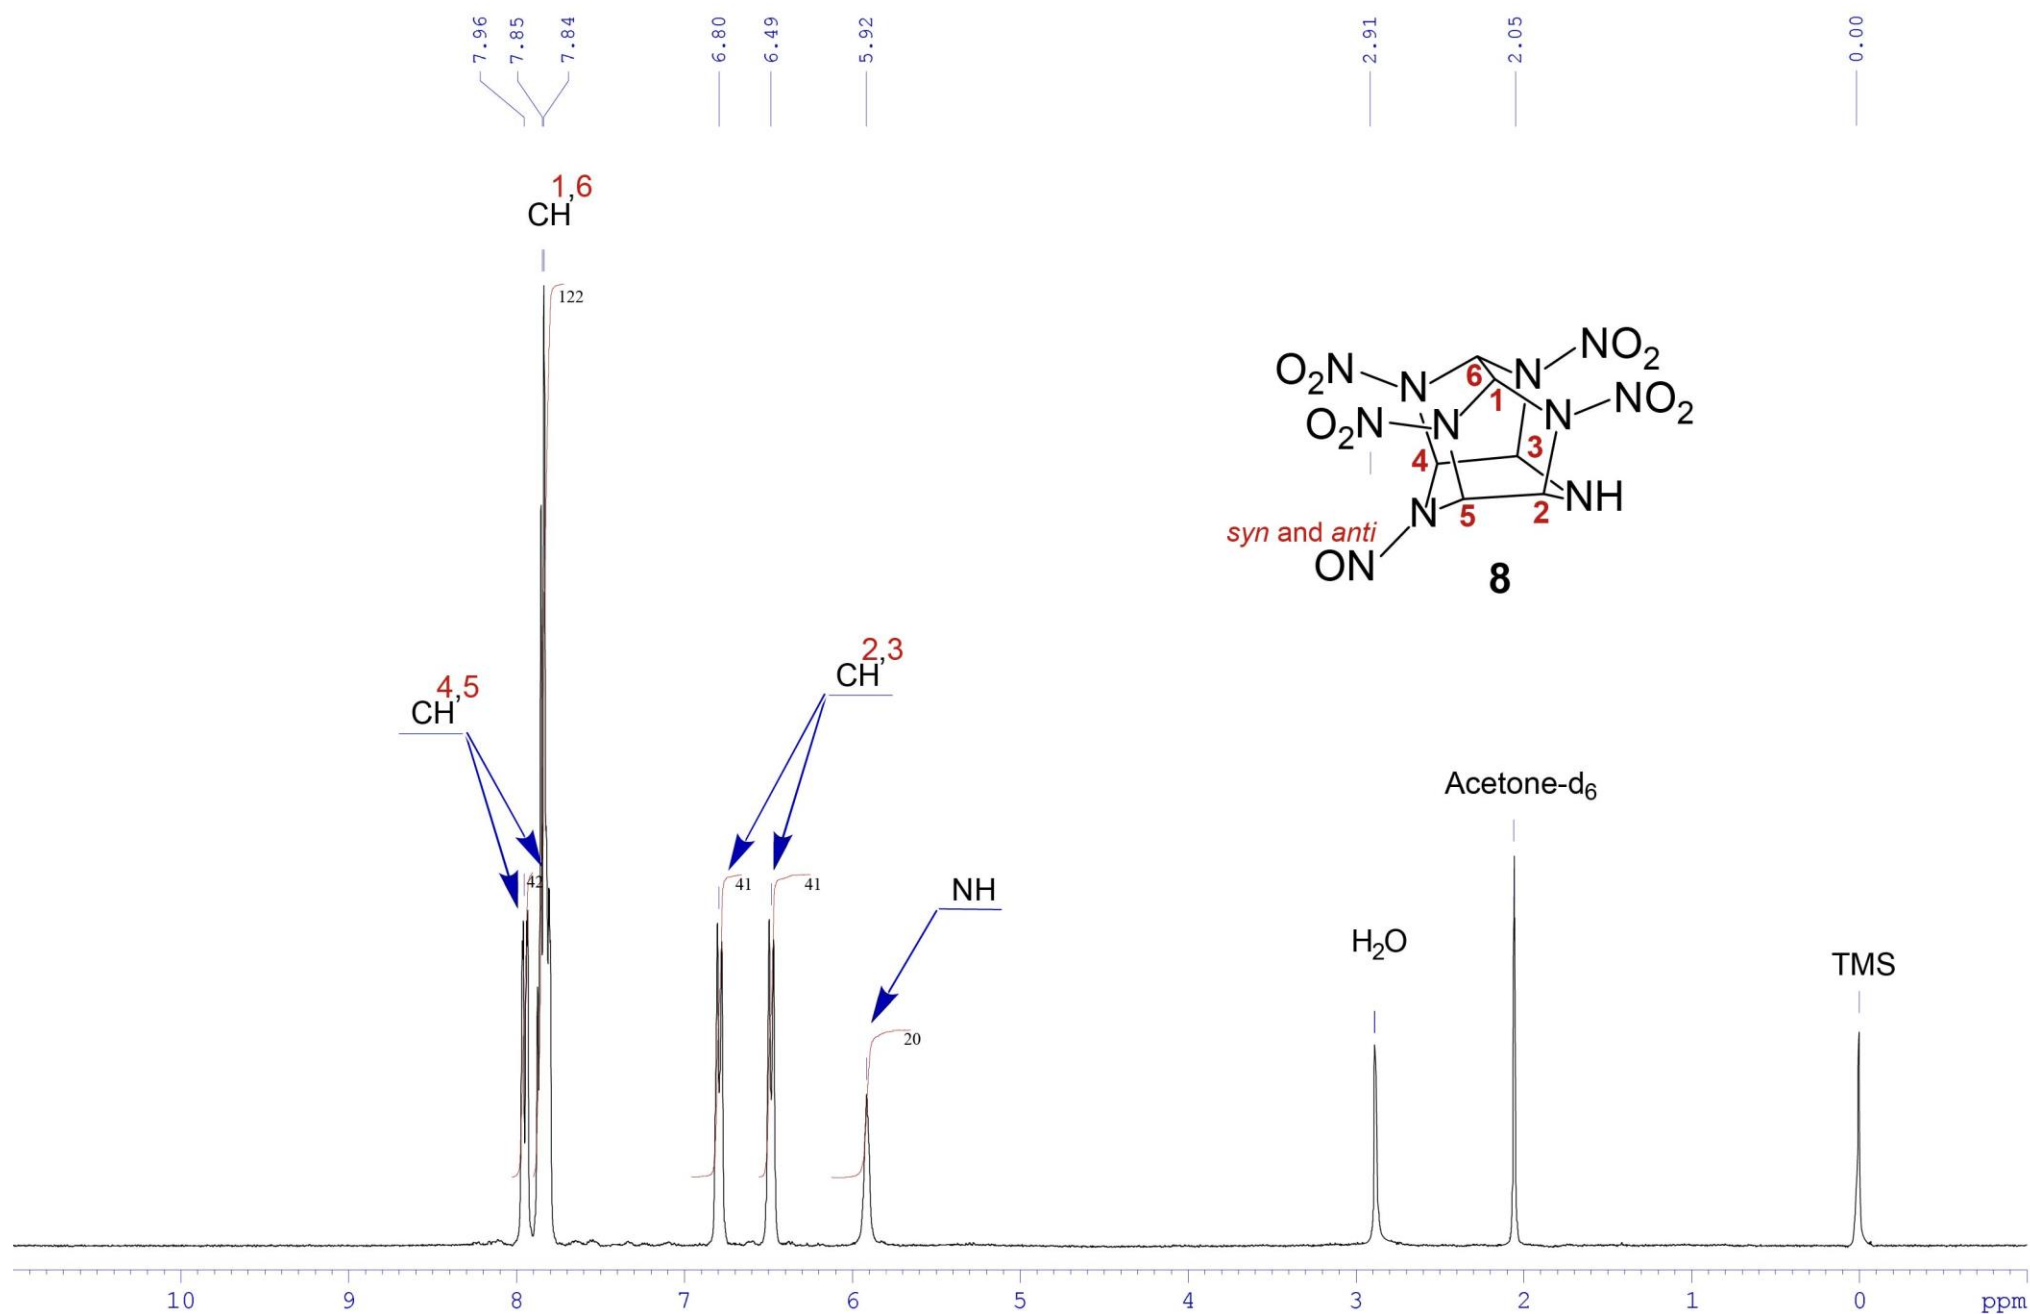

# $^{13}\text{C}$ NMR (75.5 MHz, $[\text{D}_6]$ acetone) spectrum of compound 8

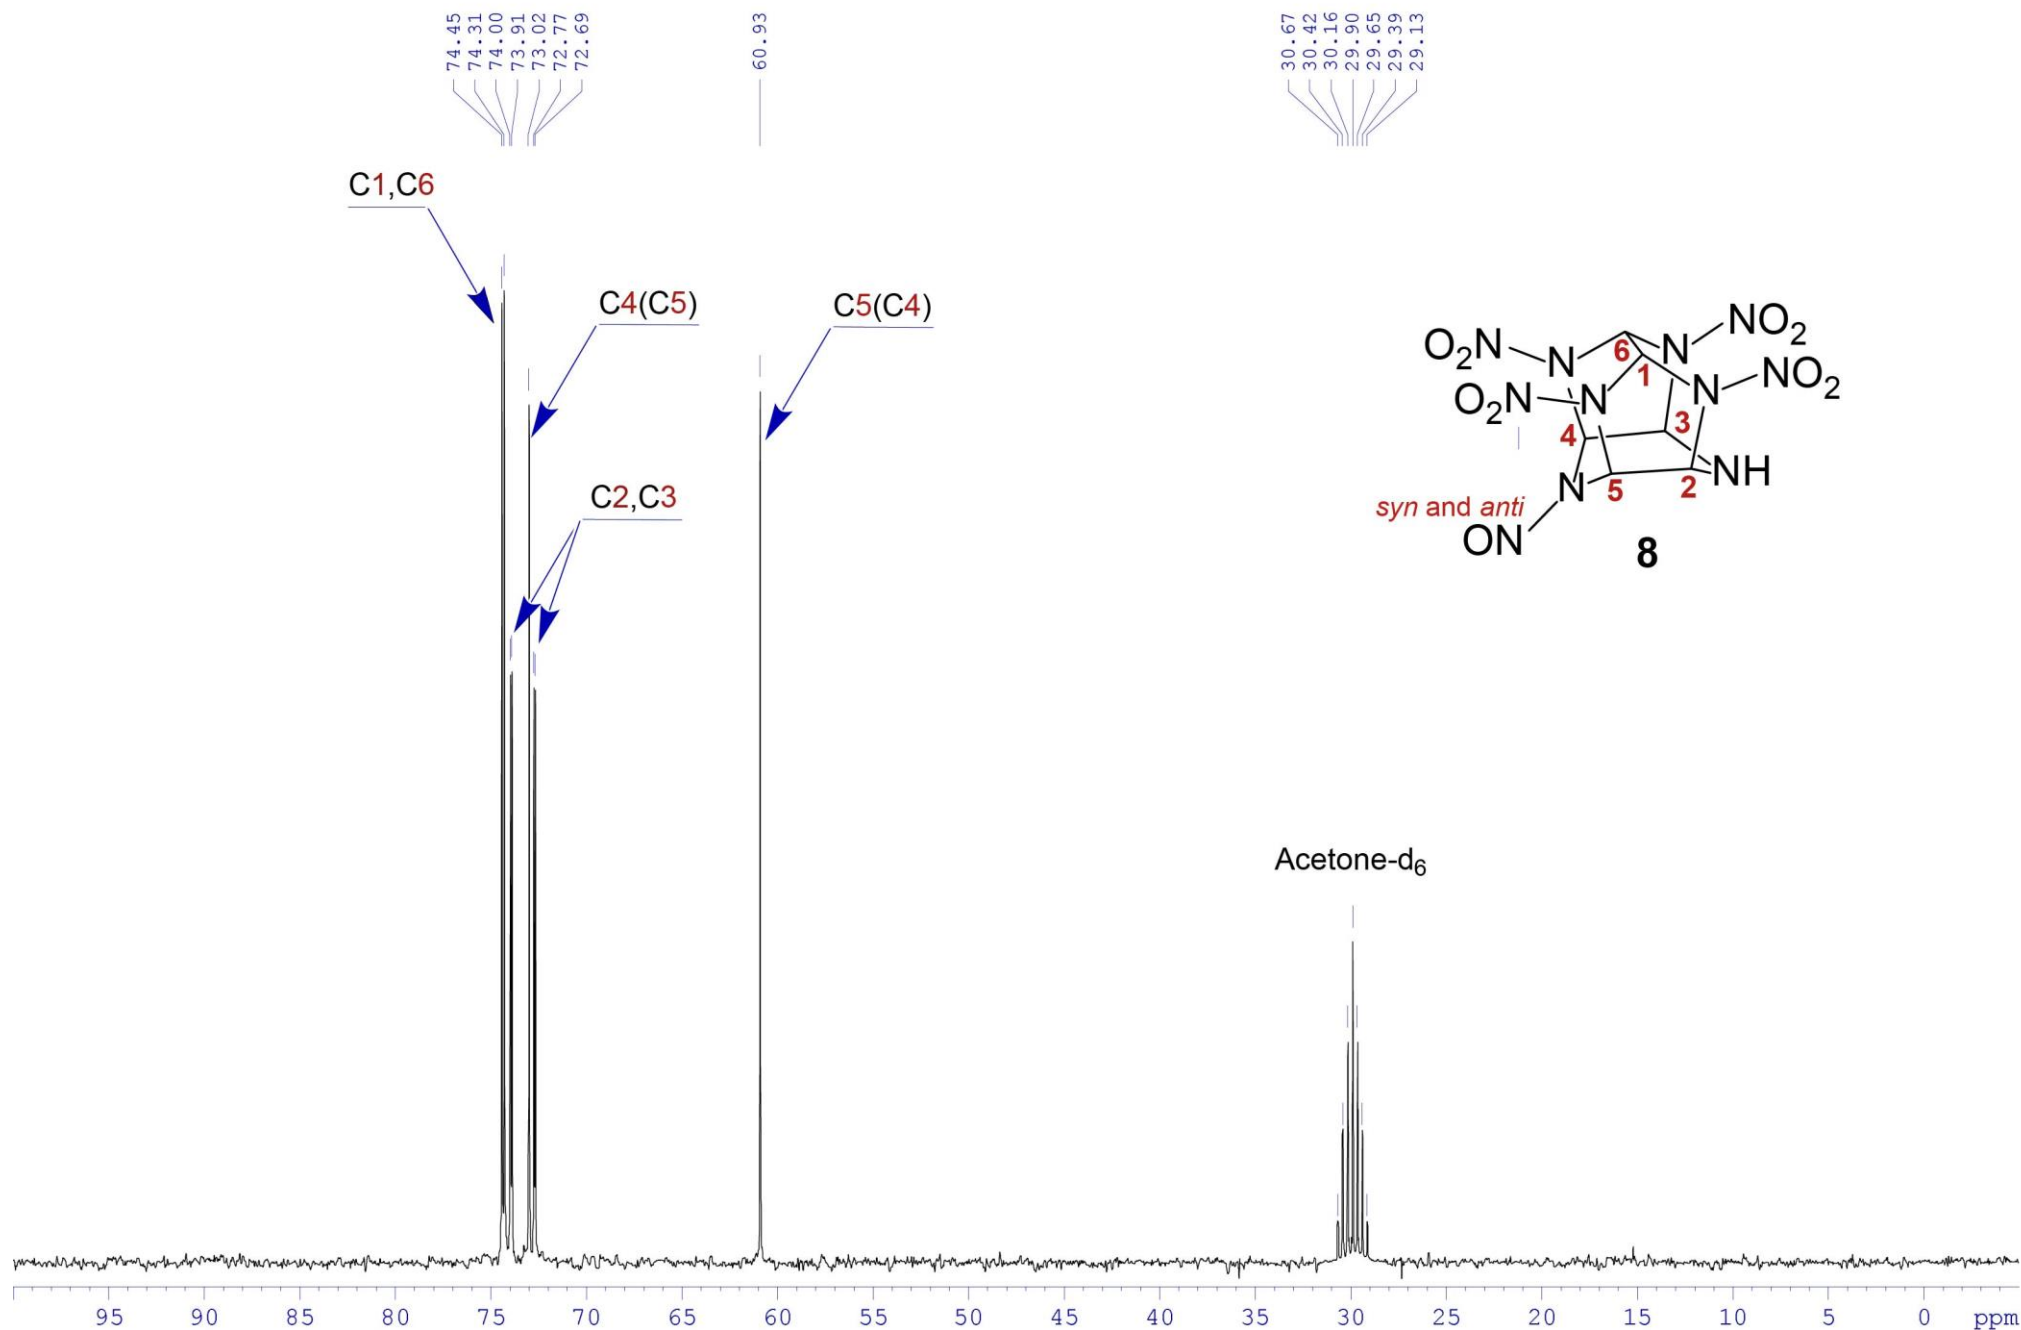

**$^{14}\text{N}$  NMR (21.7 MHz,  $[\text{D}_6]\text{acetone}$ ) spectrum of compound 8**

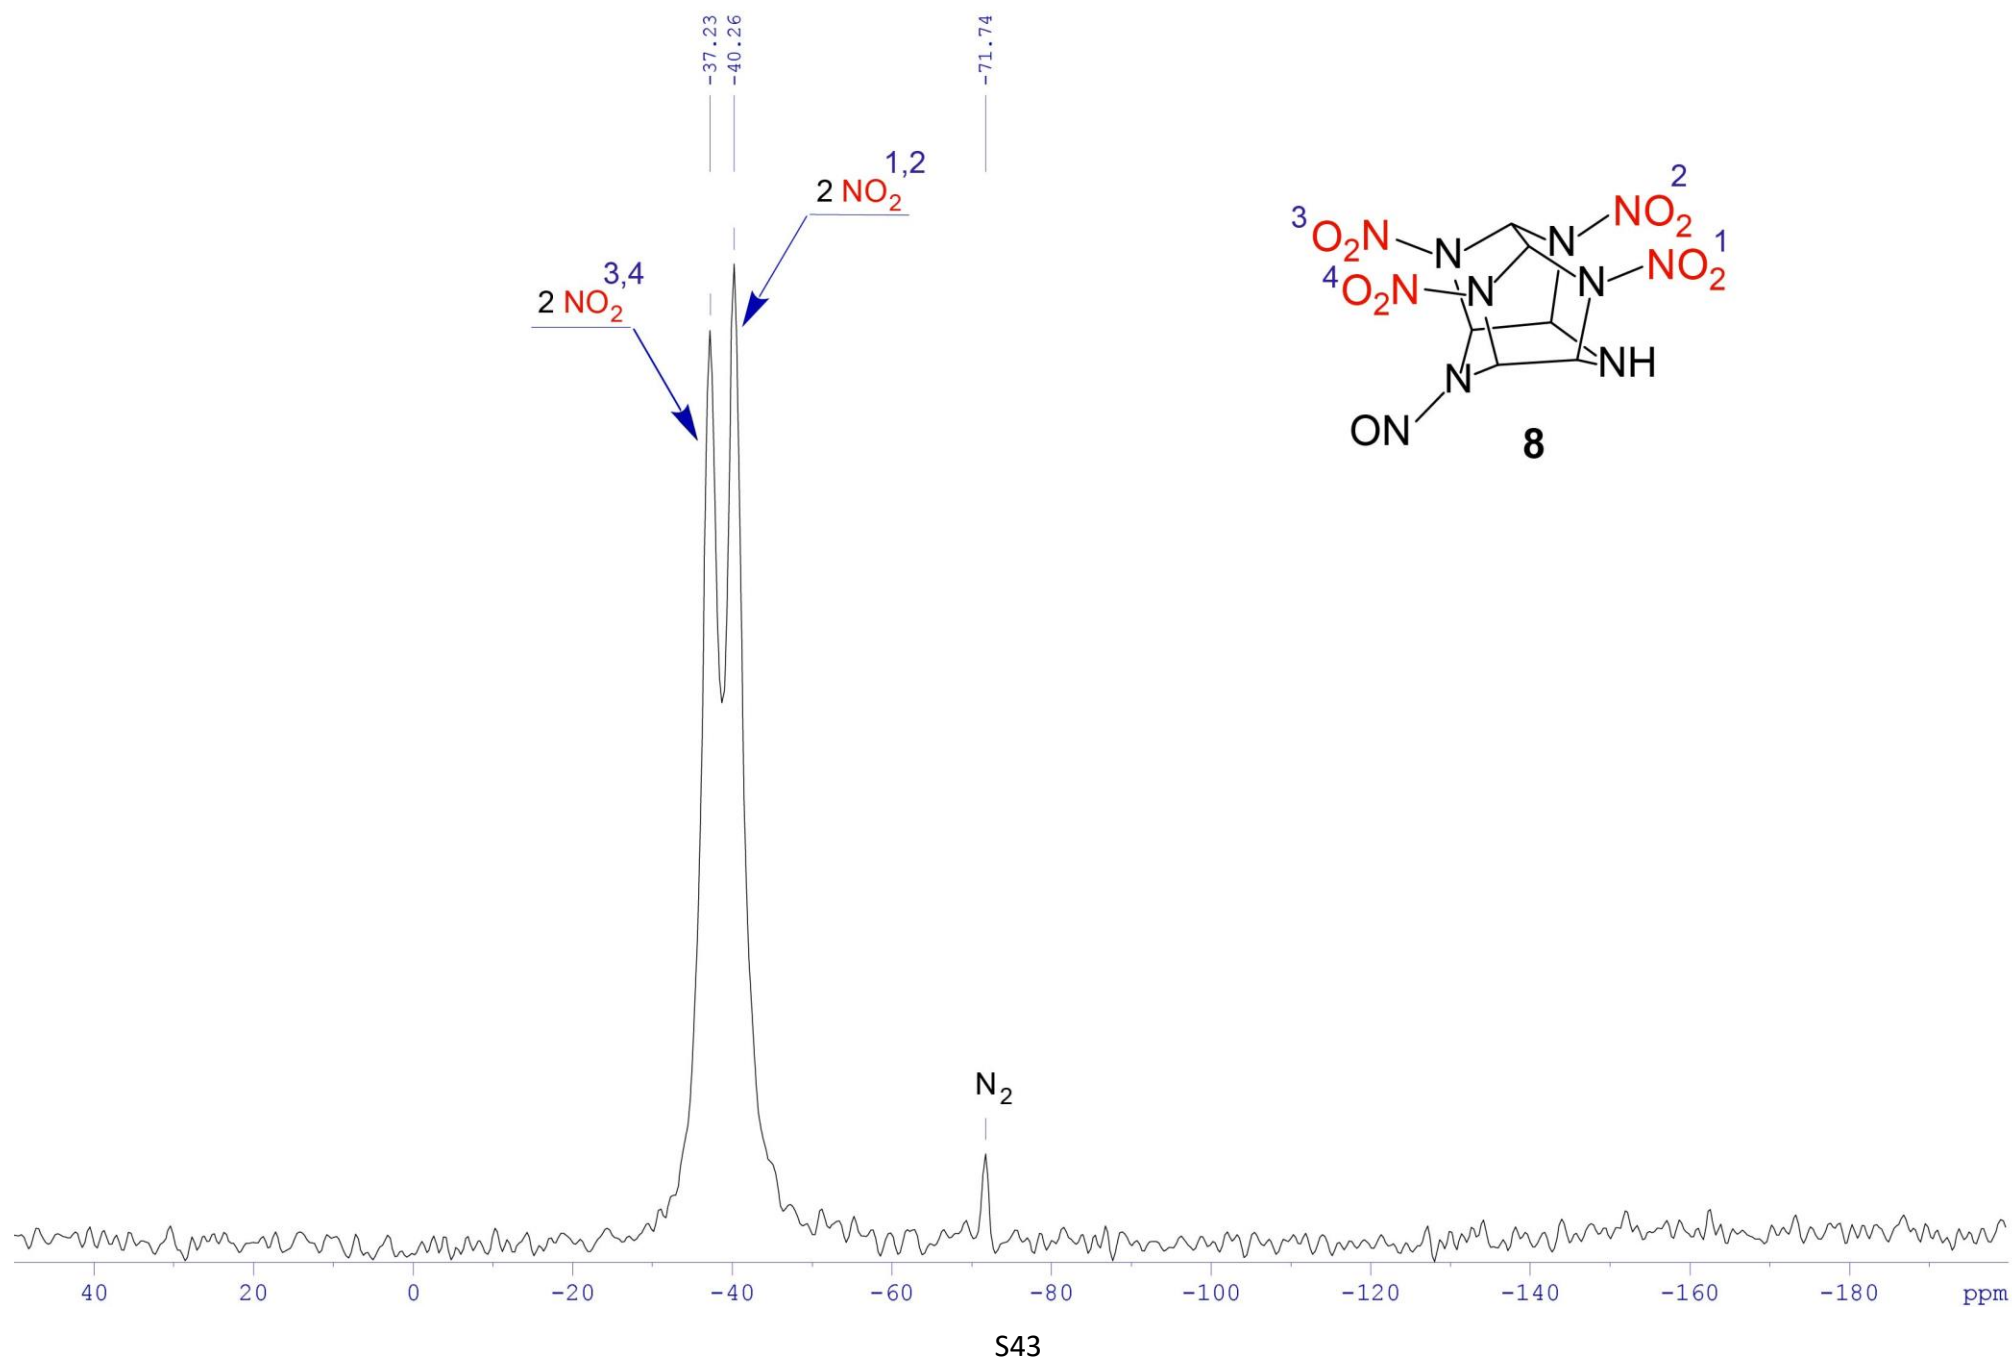

# IR (KBr) spectrum of compound 8

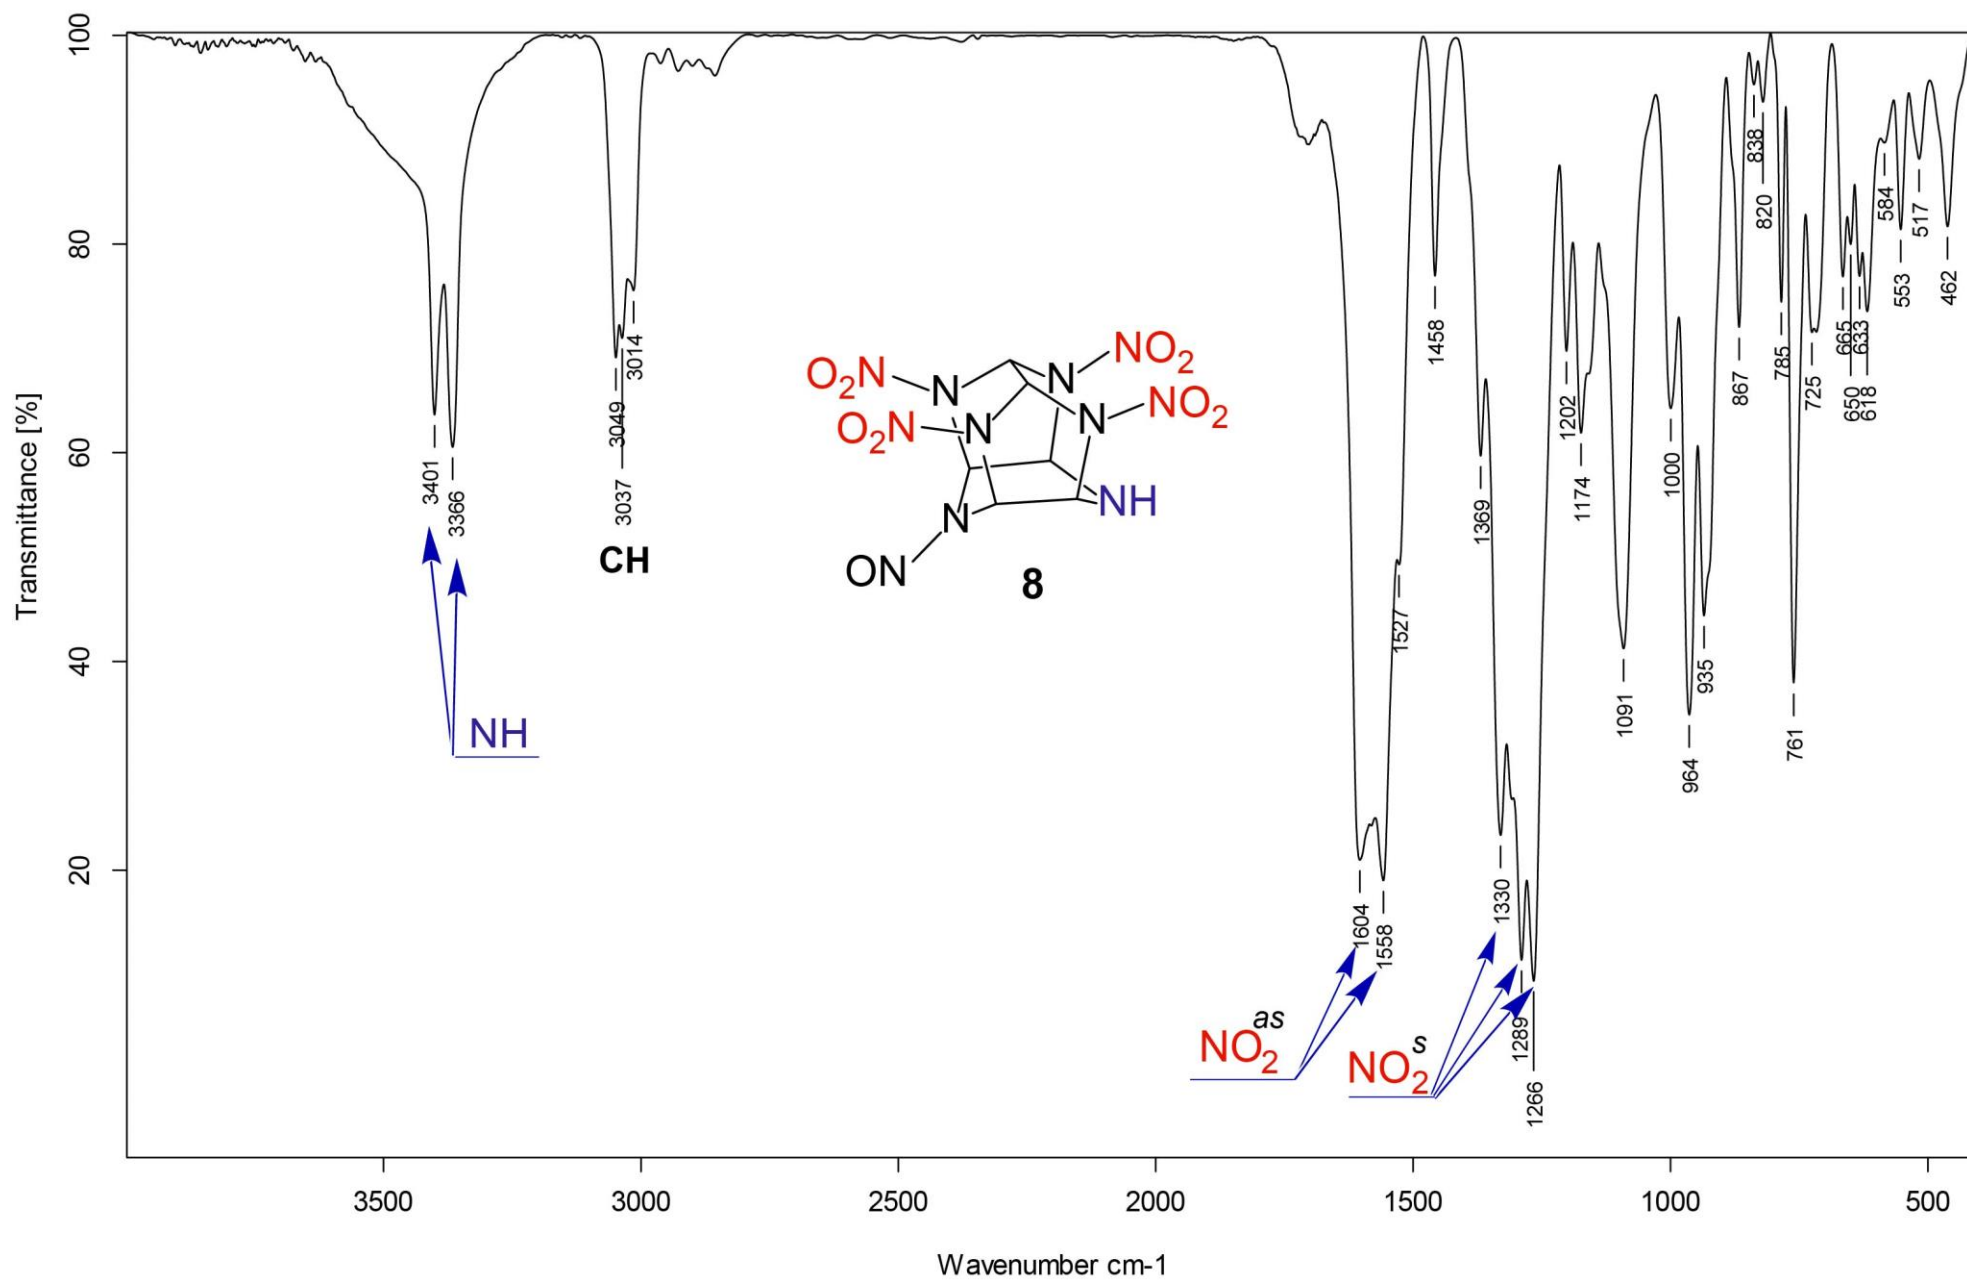

# HRMS (ESI) for compound 8

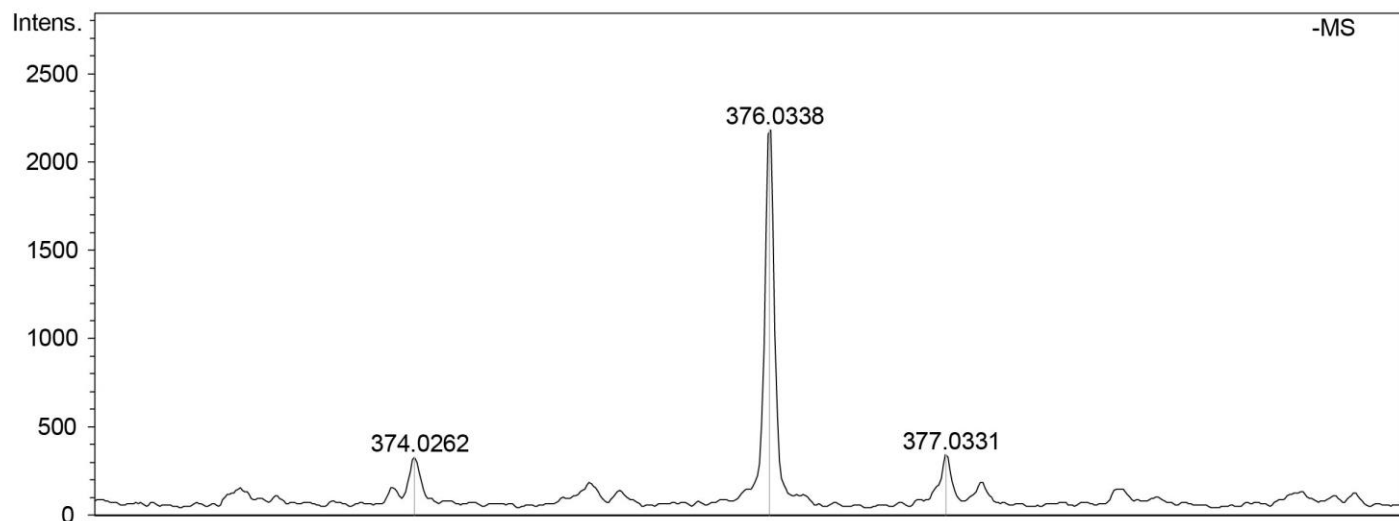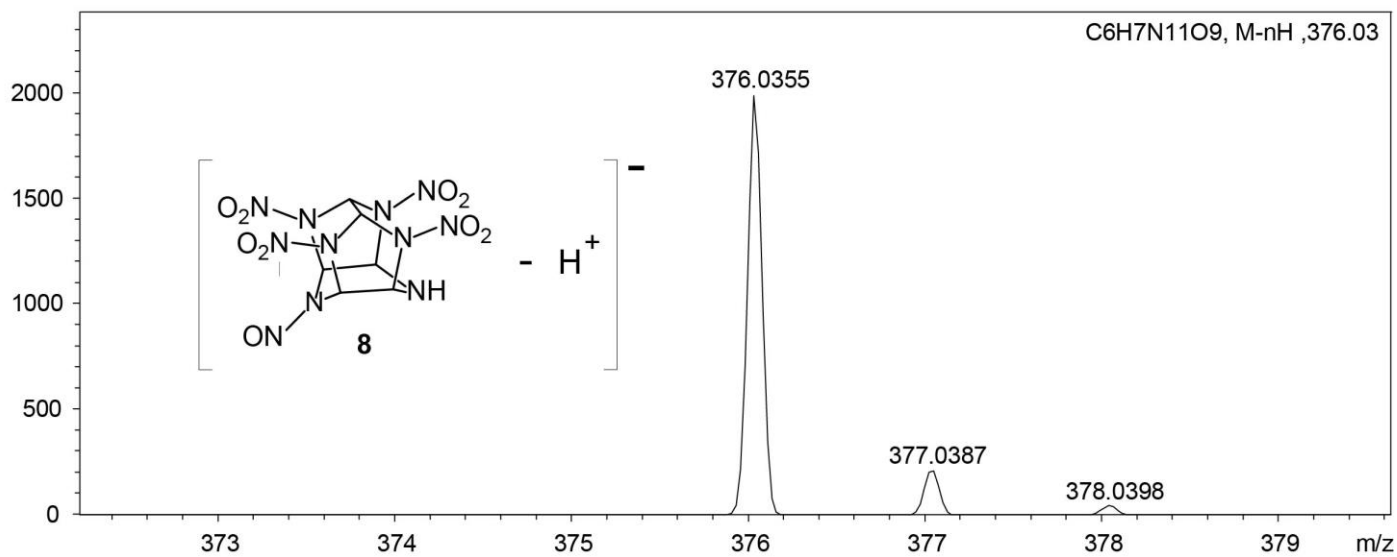

# <sup>1</sup>H NMR (300.1 MHz, [D<sub>6</sub>]acetone) spectrum of compound 10

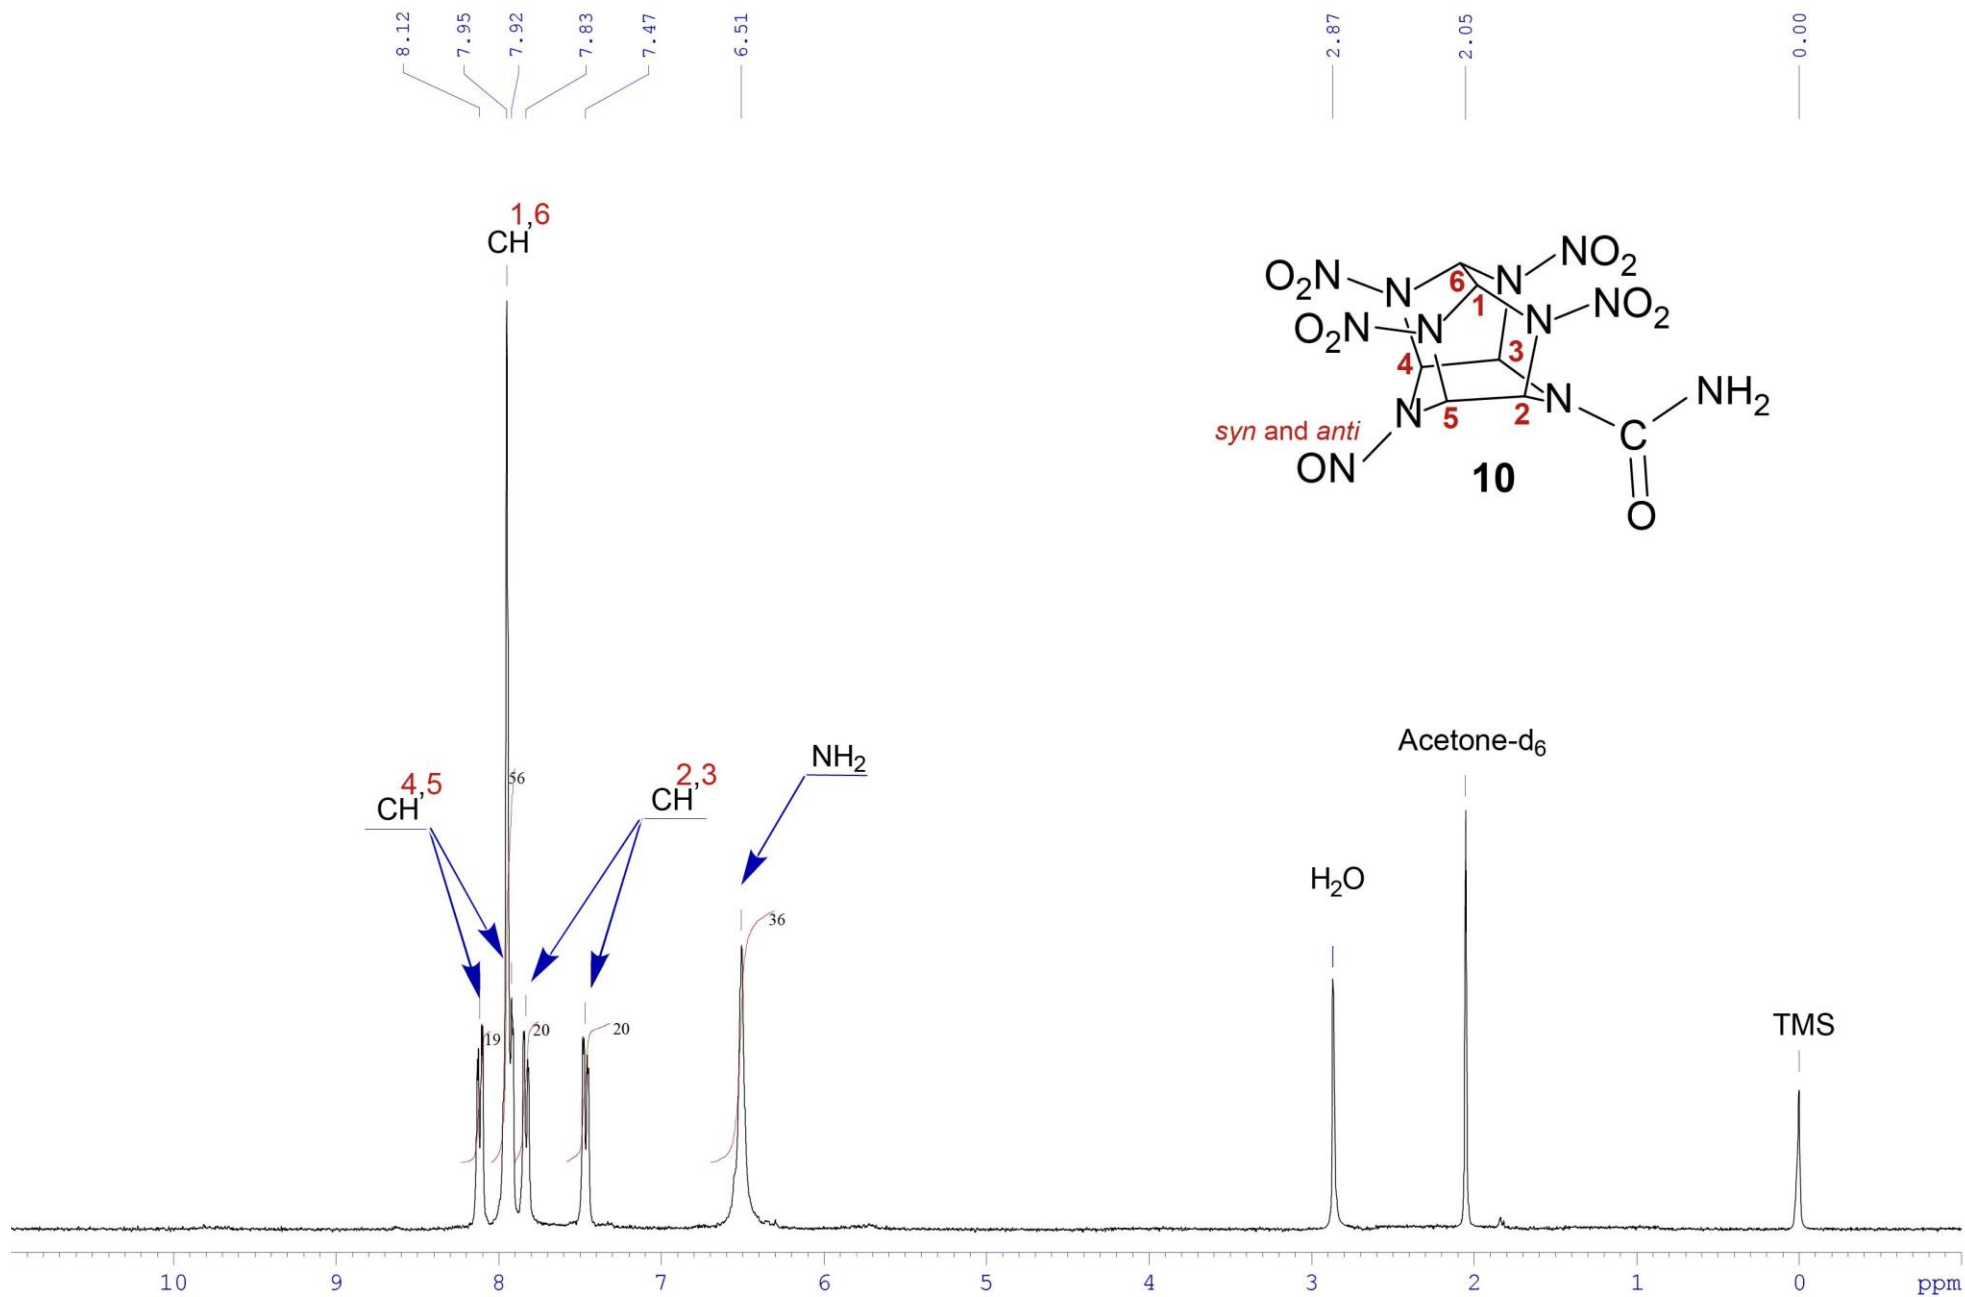

# <sup>13</sup>C NMR (75.5 MHz, [D<sub>6</sub>]acetone) spectrum of compound 10

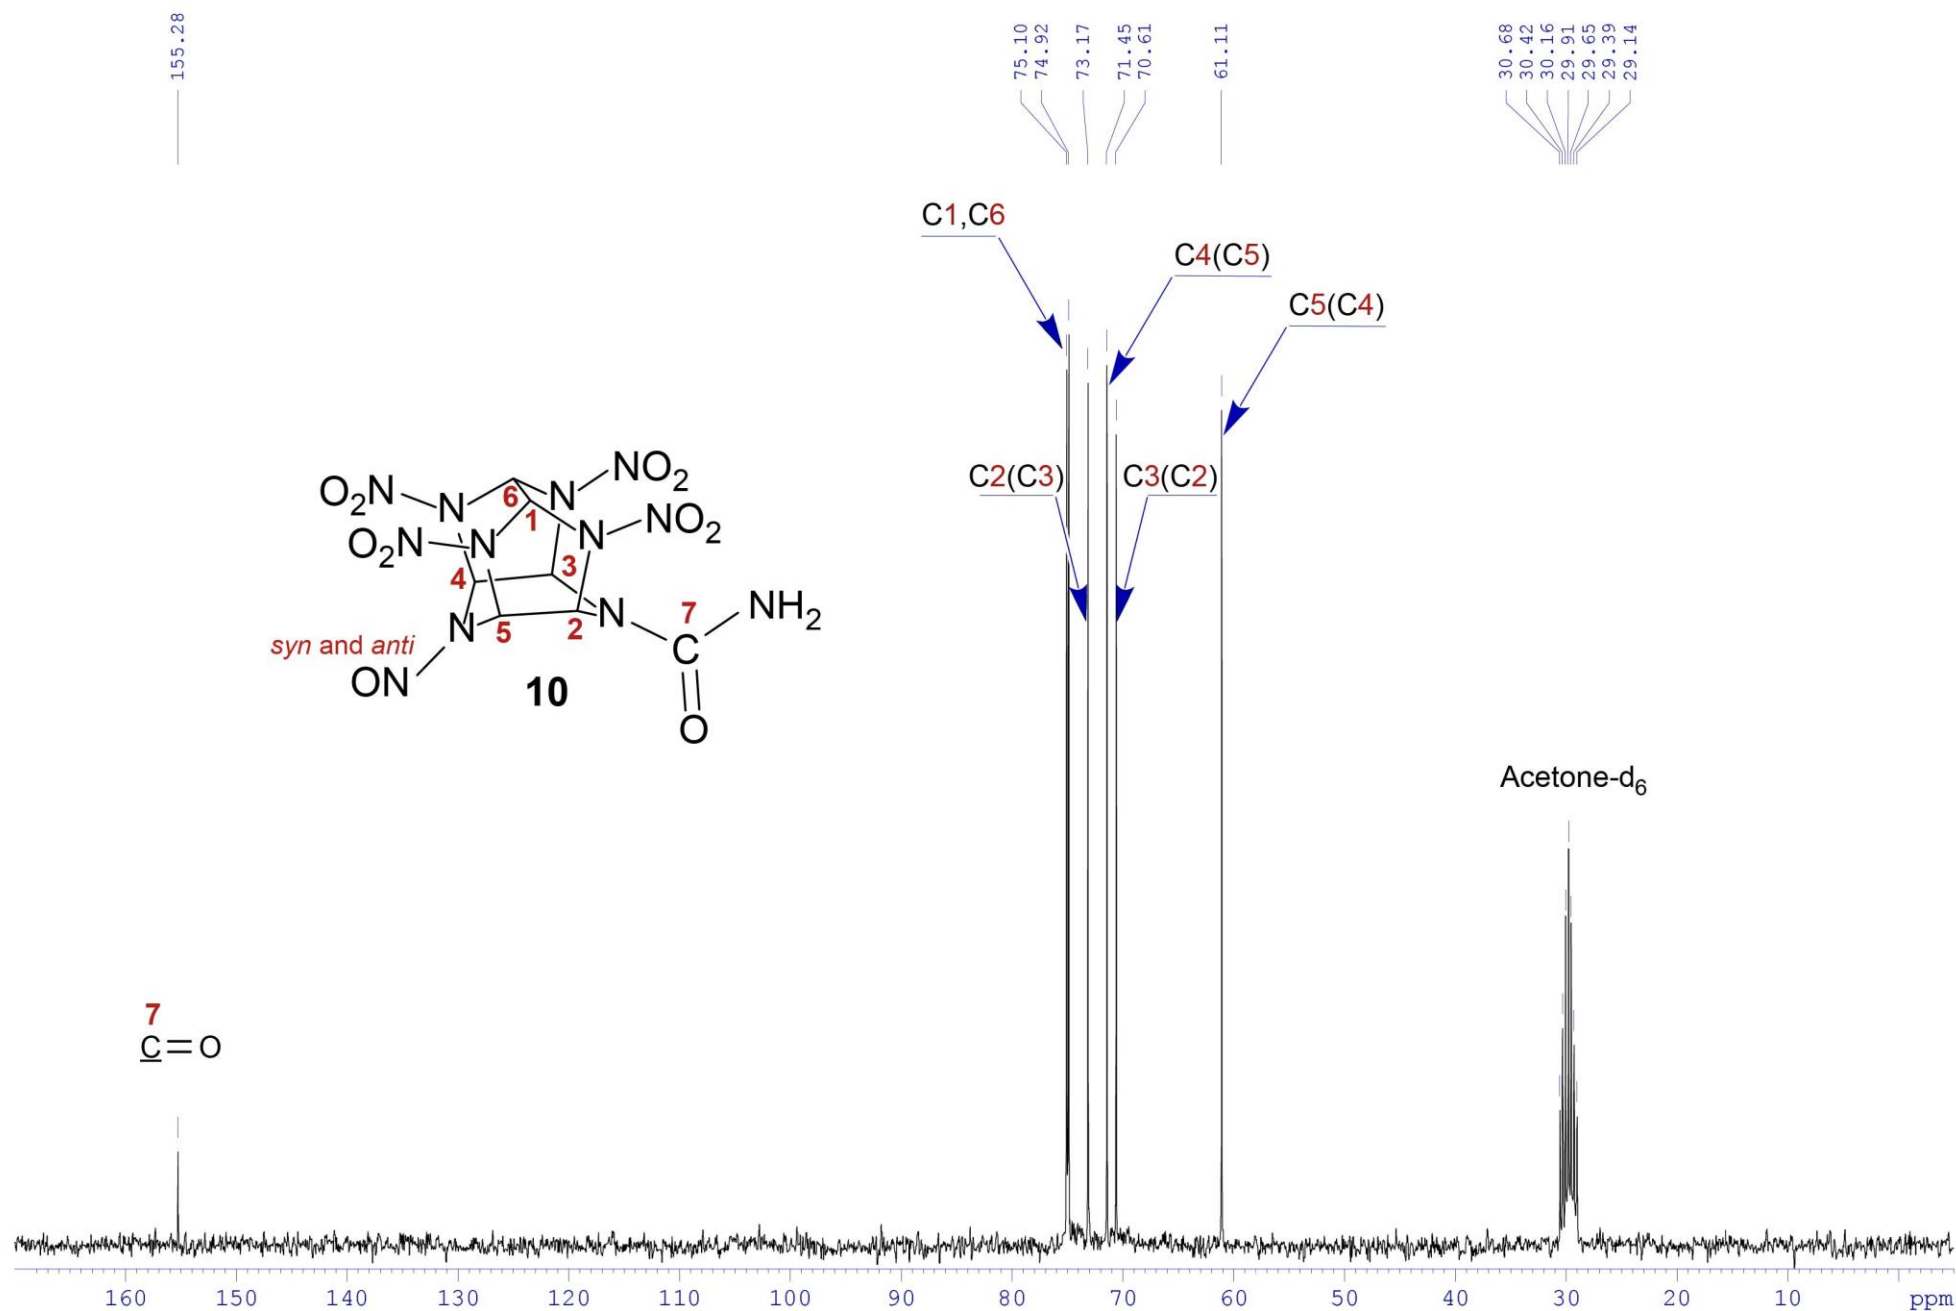

**$^{14}\text{N}$  NMR (21.7 MHz,  $[\text{D}_6]\text{acetone}$ ) spectrum of compound 10**

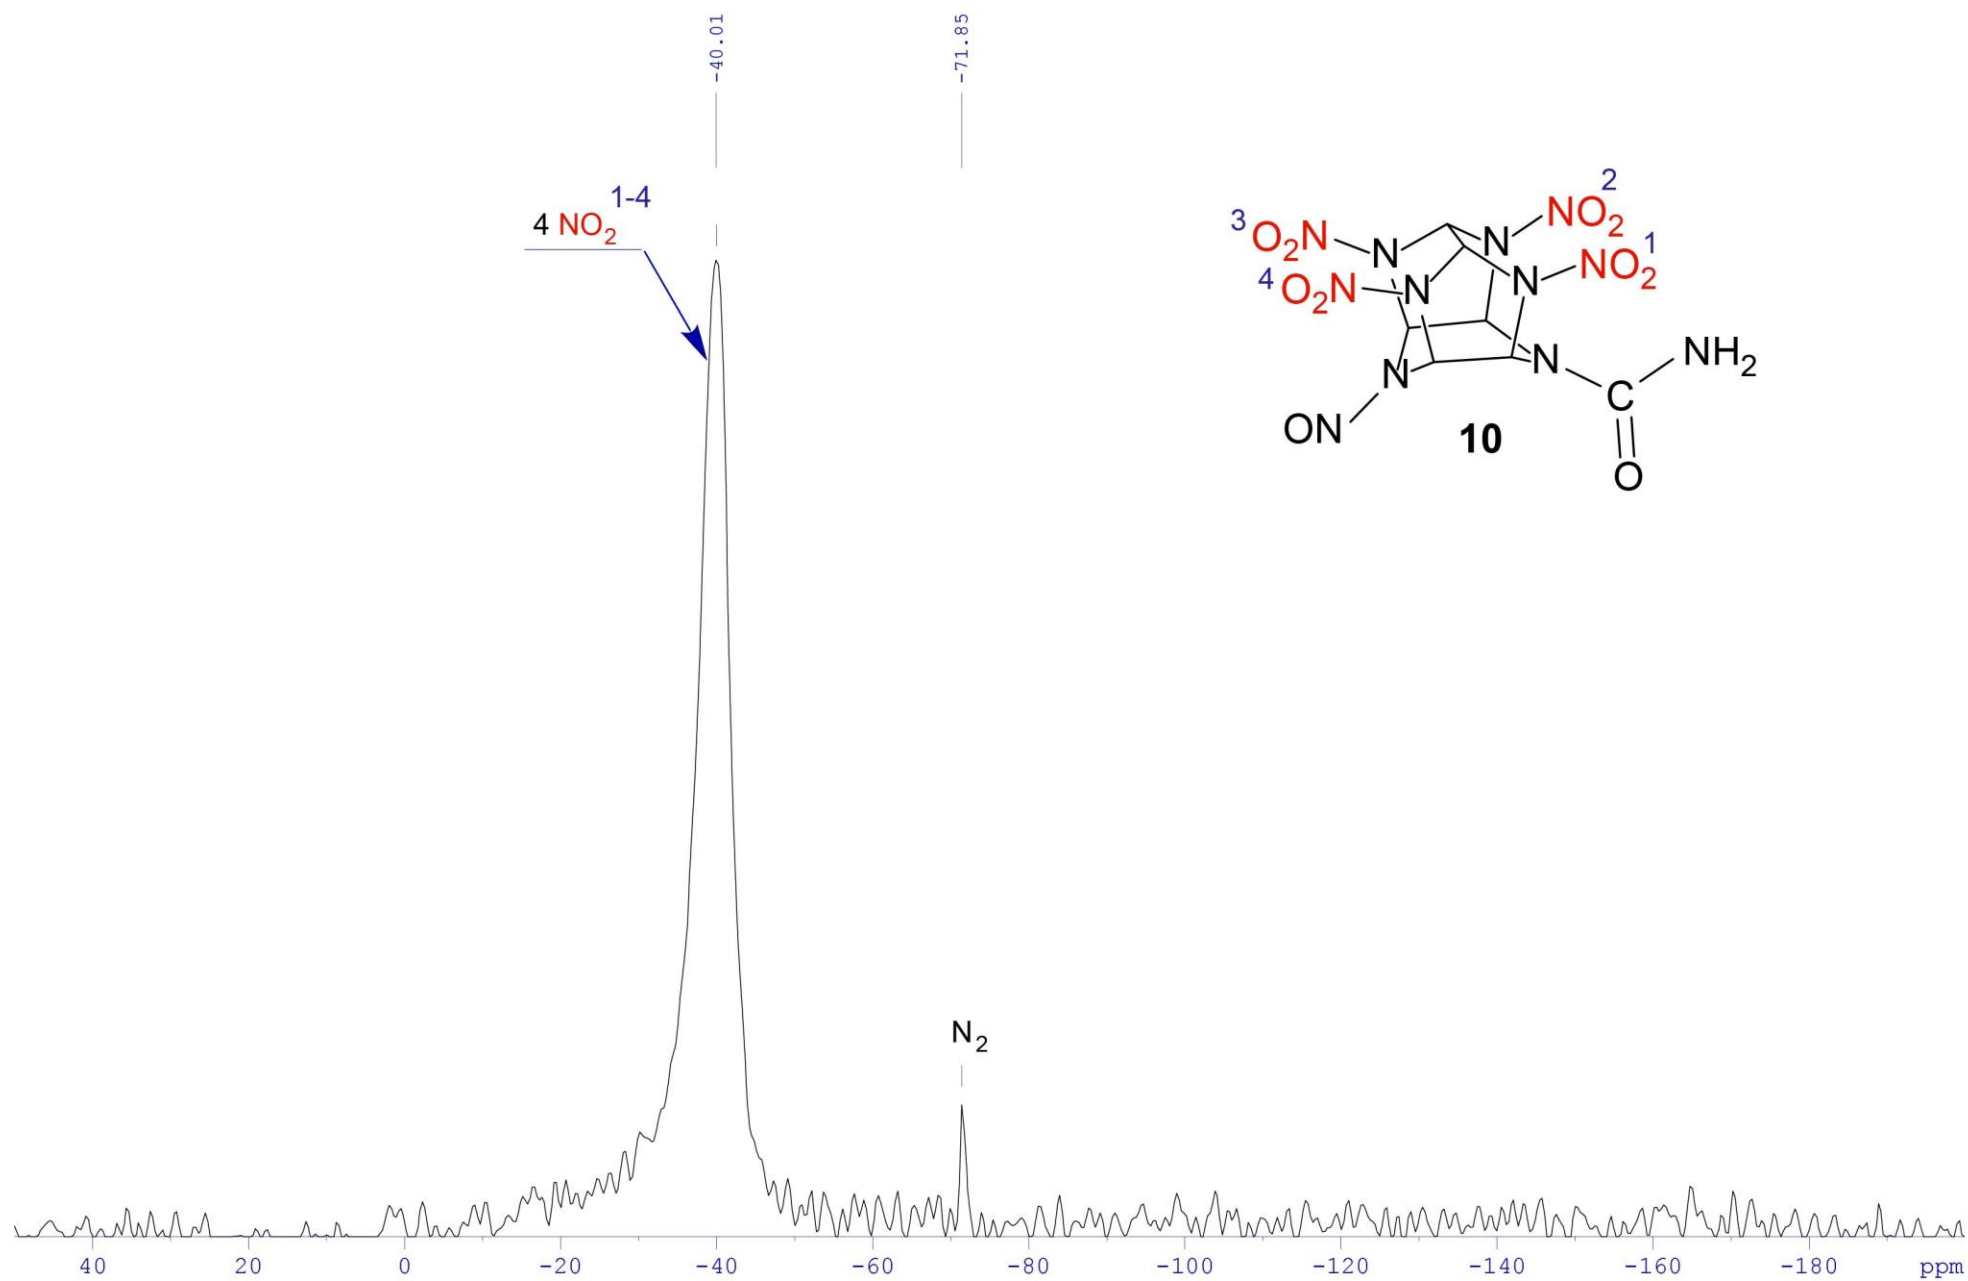

## IR (KBr) spectrum of compound 10

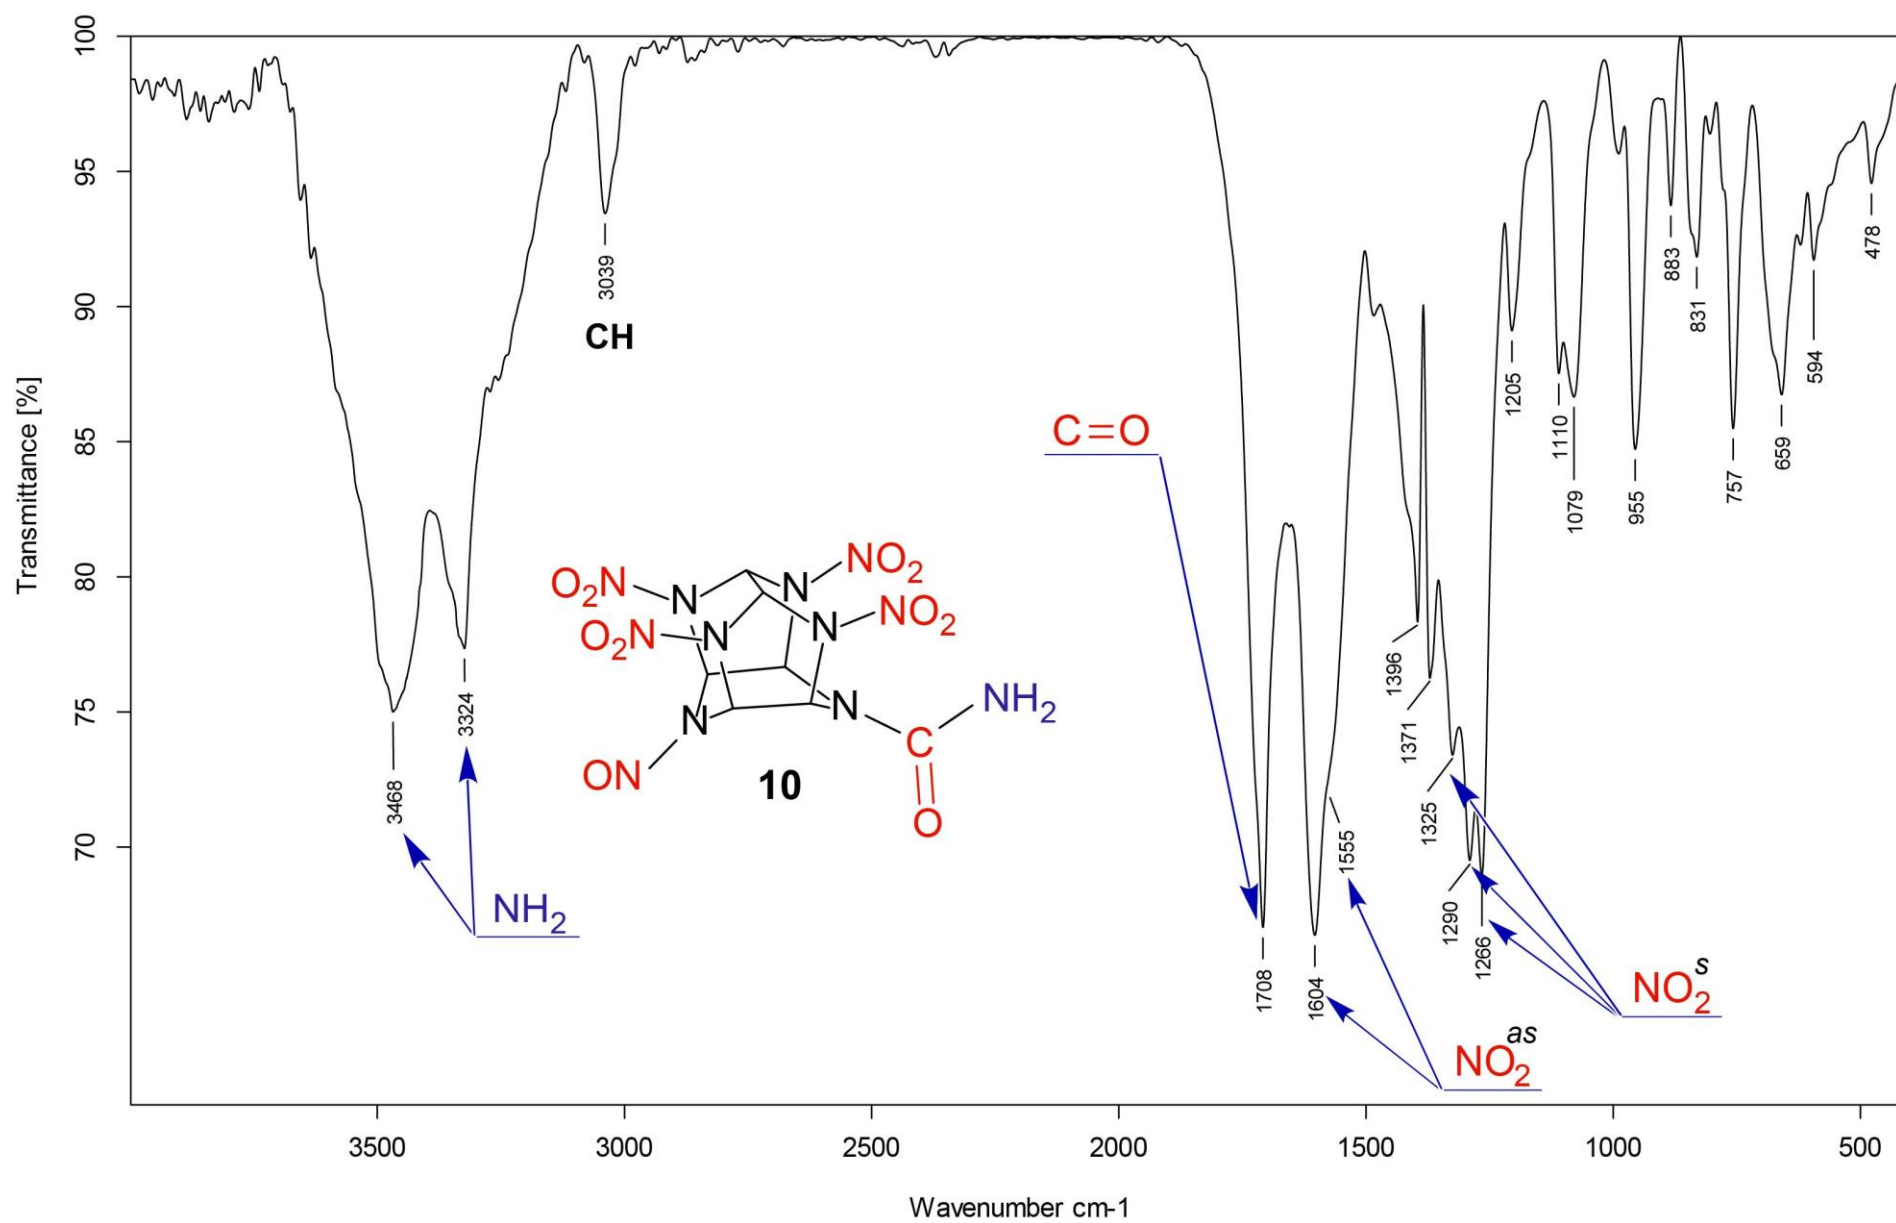

# HRMS (ESI) for compound 10

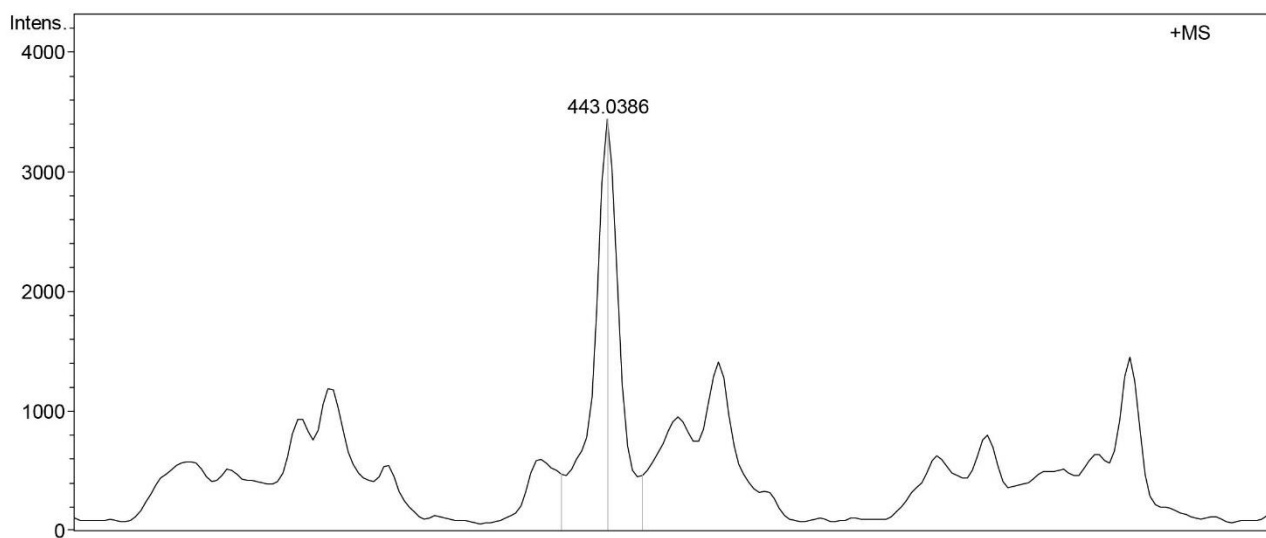

2

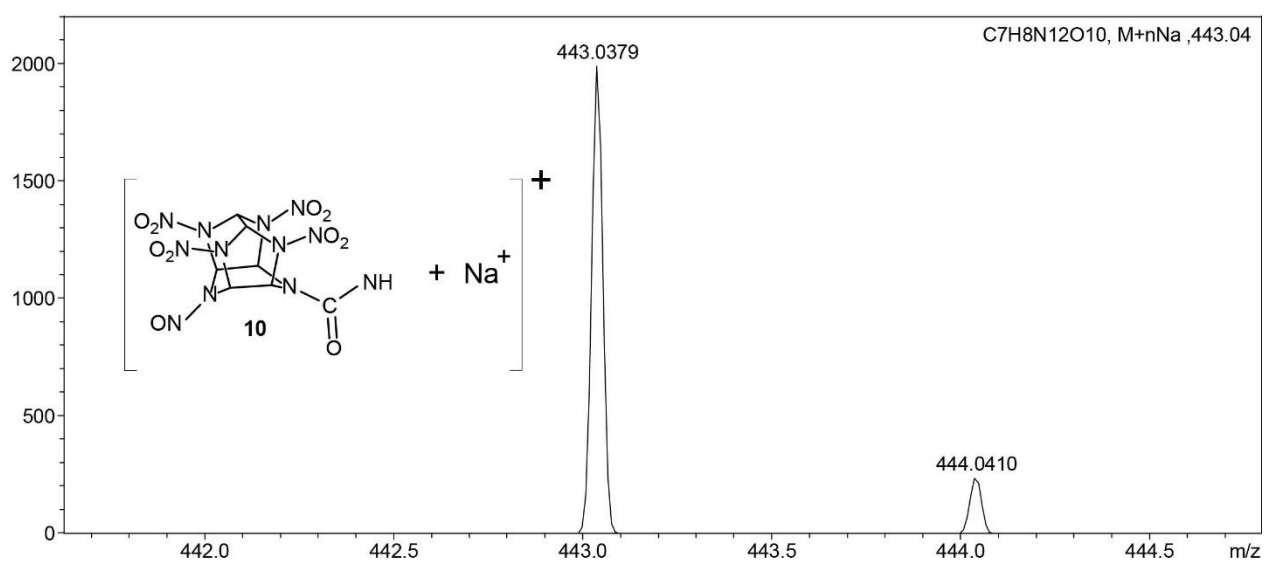

**$^1\text{H}$  NMR (300.1 MHz,  $[\text{D}_6]$ acetone) spectrum of compound 12**

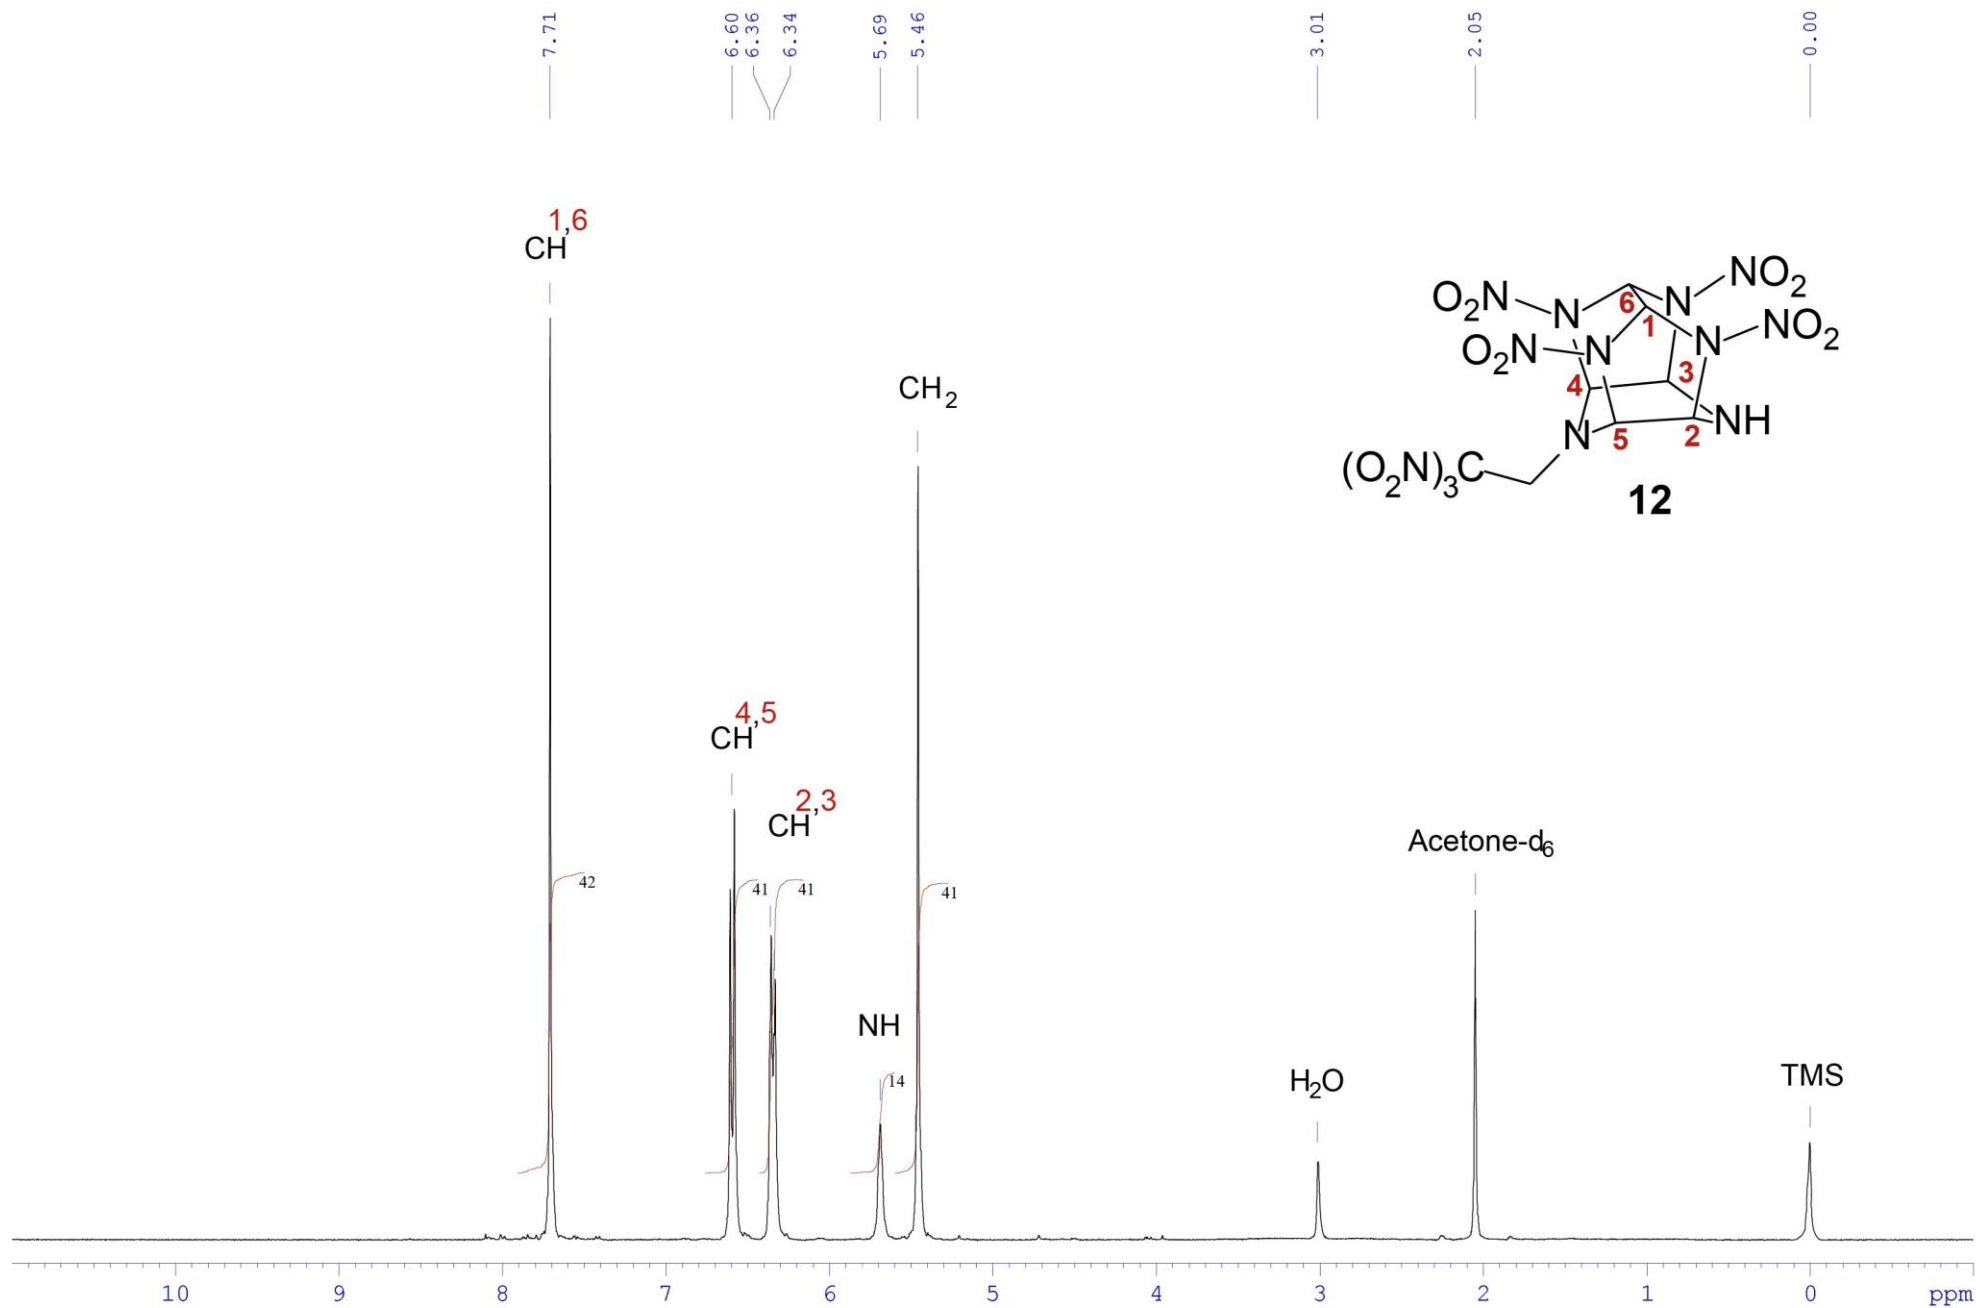

# $^{13}\text{C}$ NMR (75.5 MHz, $[\text{D}_6]\text{acetone}$ ) spectrum of compound 12

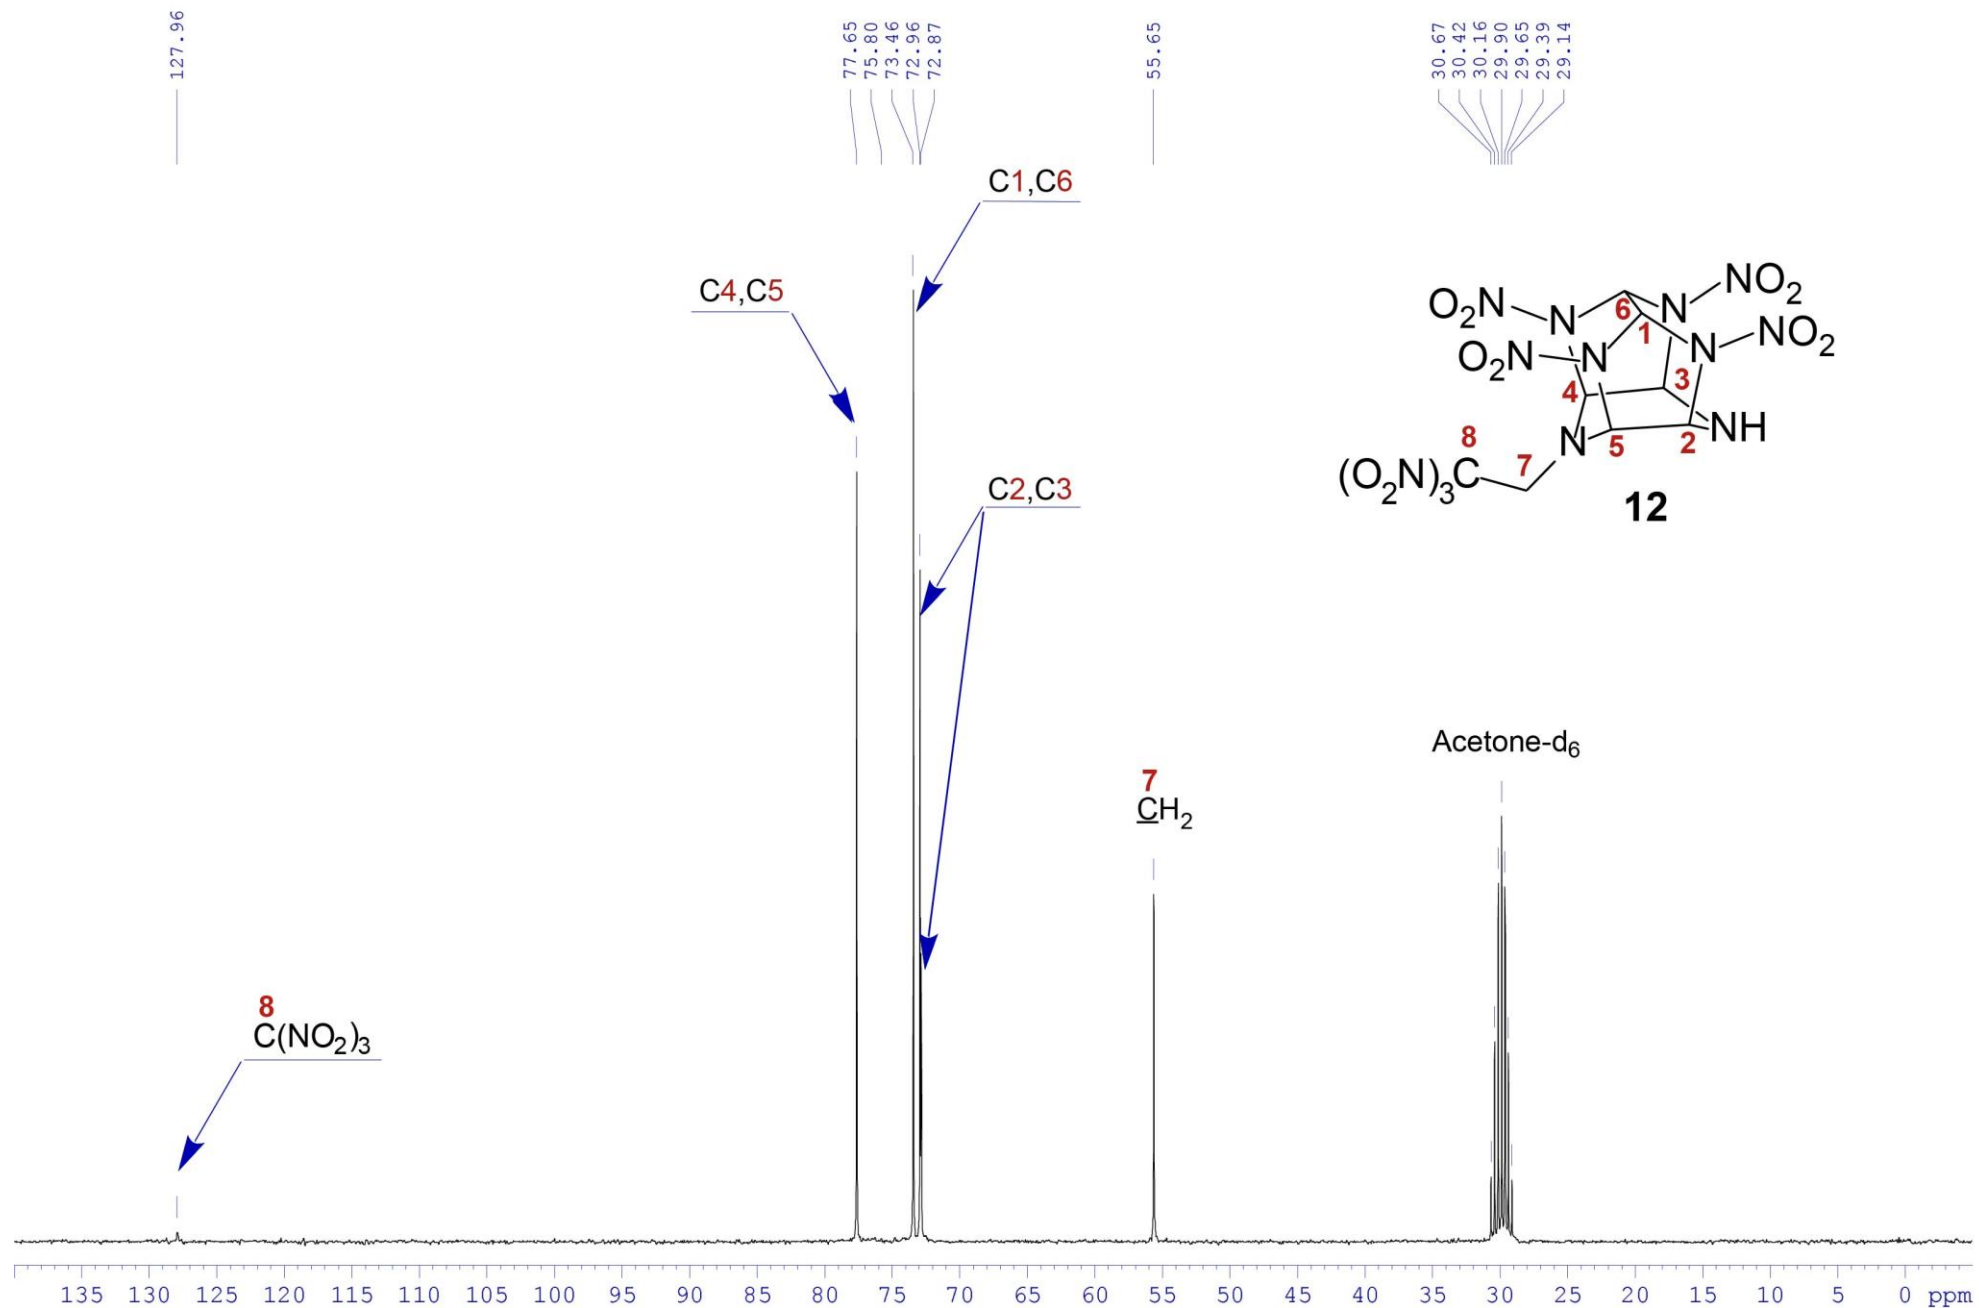

**$^{14}\text{N}$  NMR (21.7 MHz,  $[\text{D}_6]$ acetone) spectrum of compound 12**

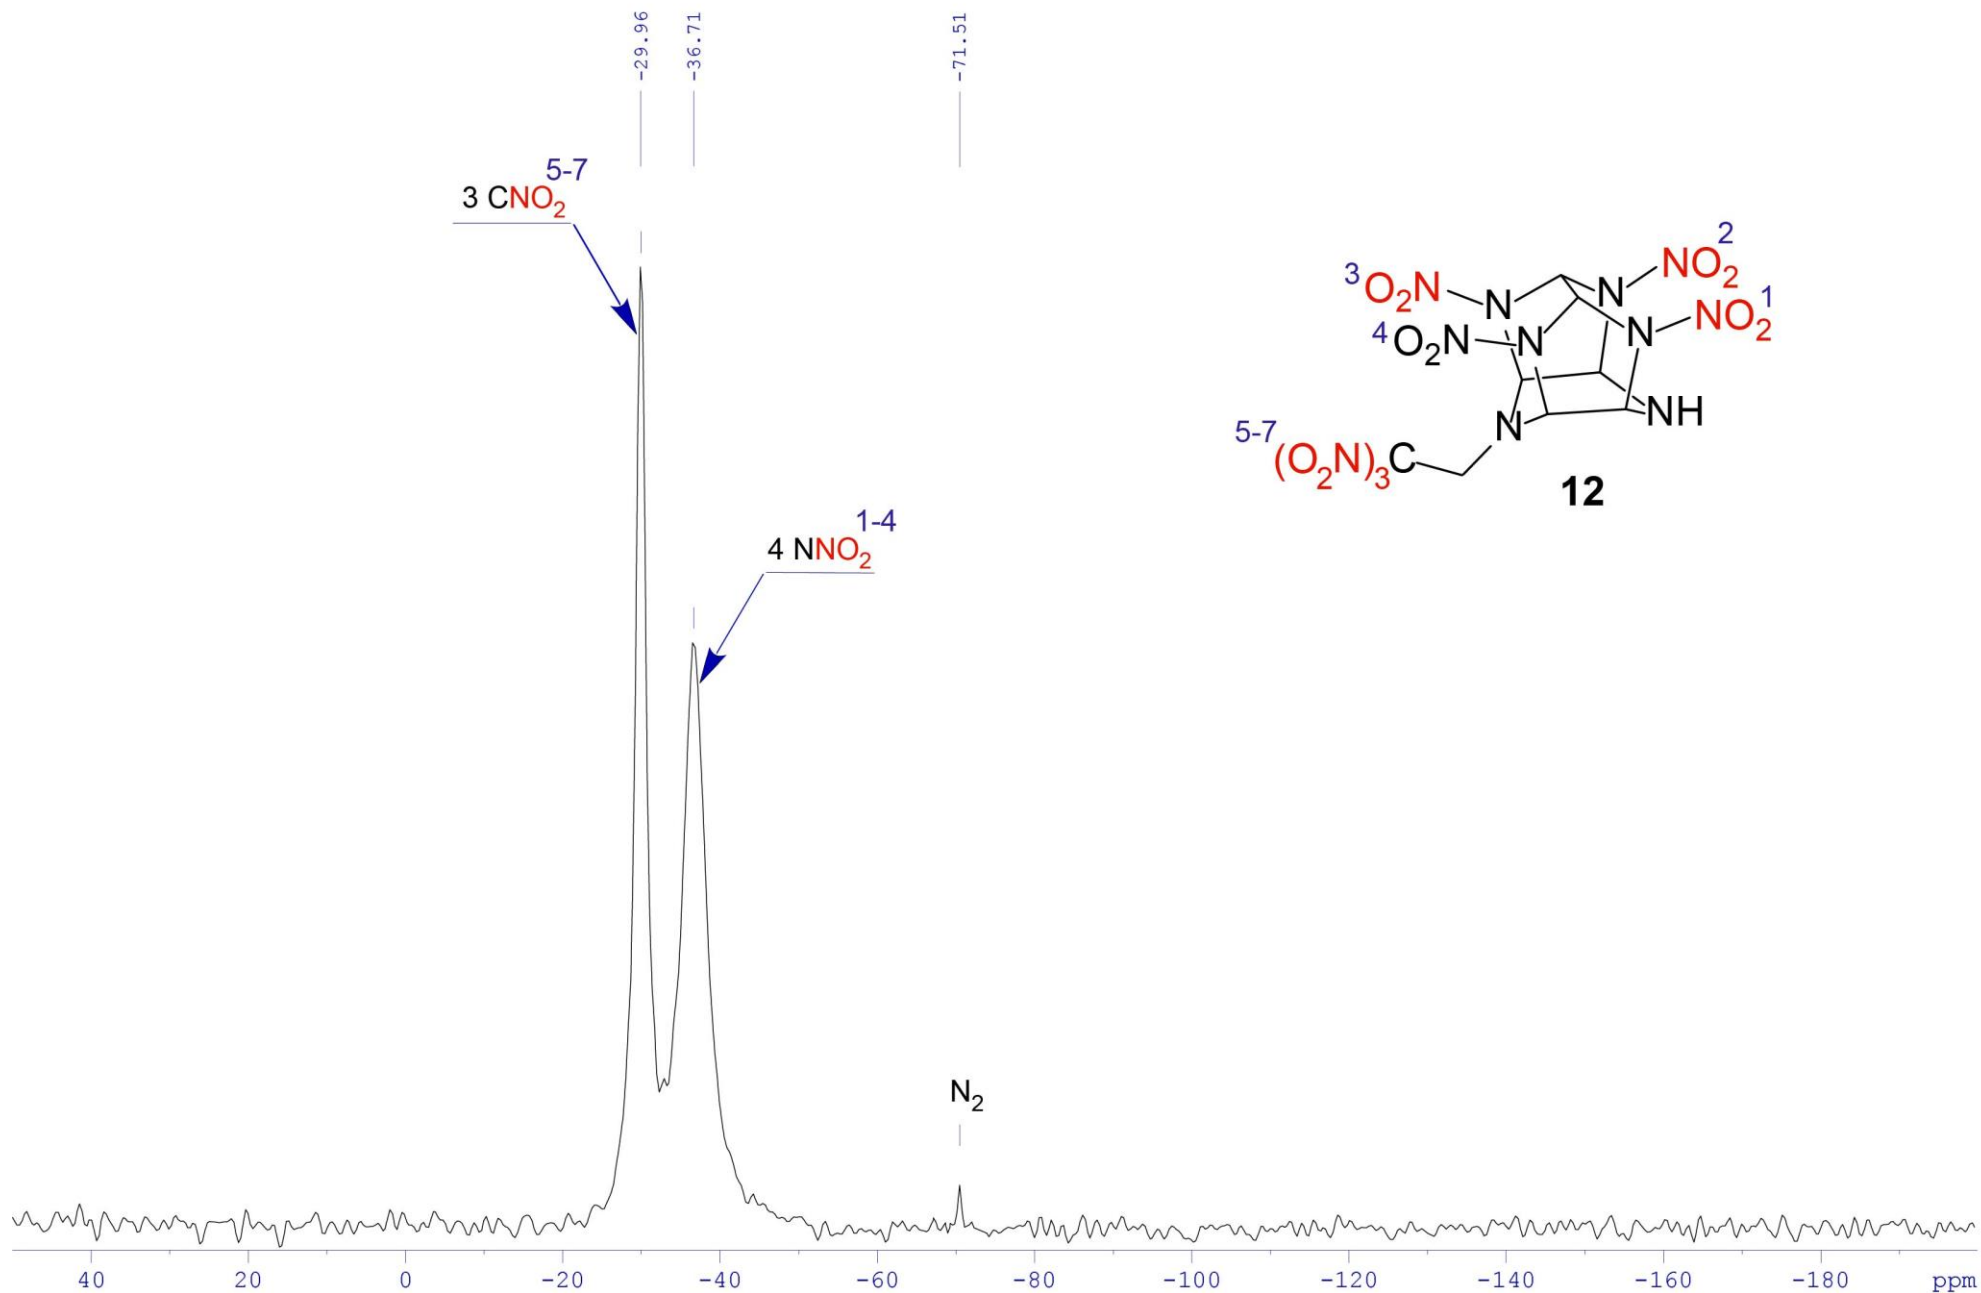

# IR (KBr) spectrum of compound 12

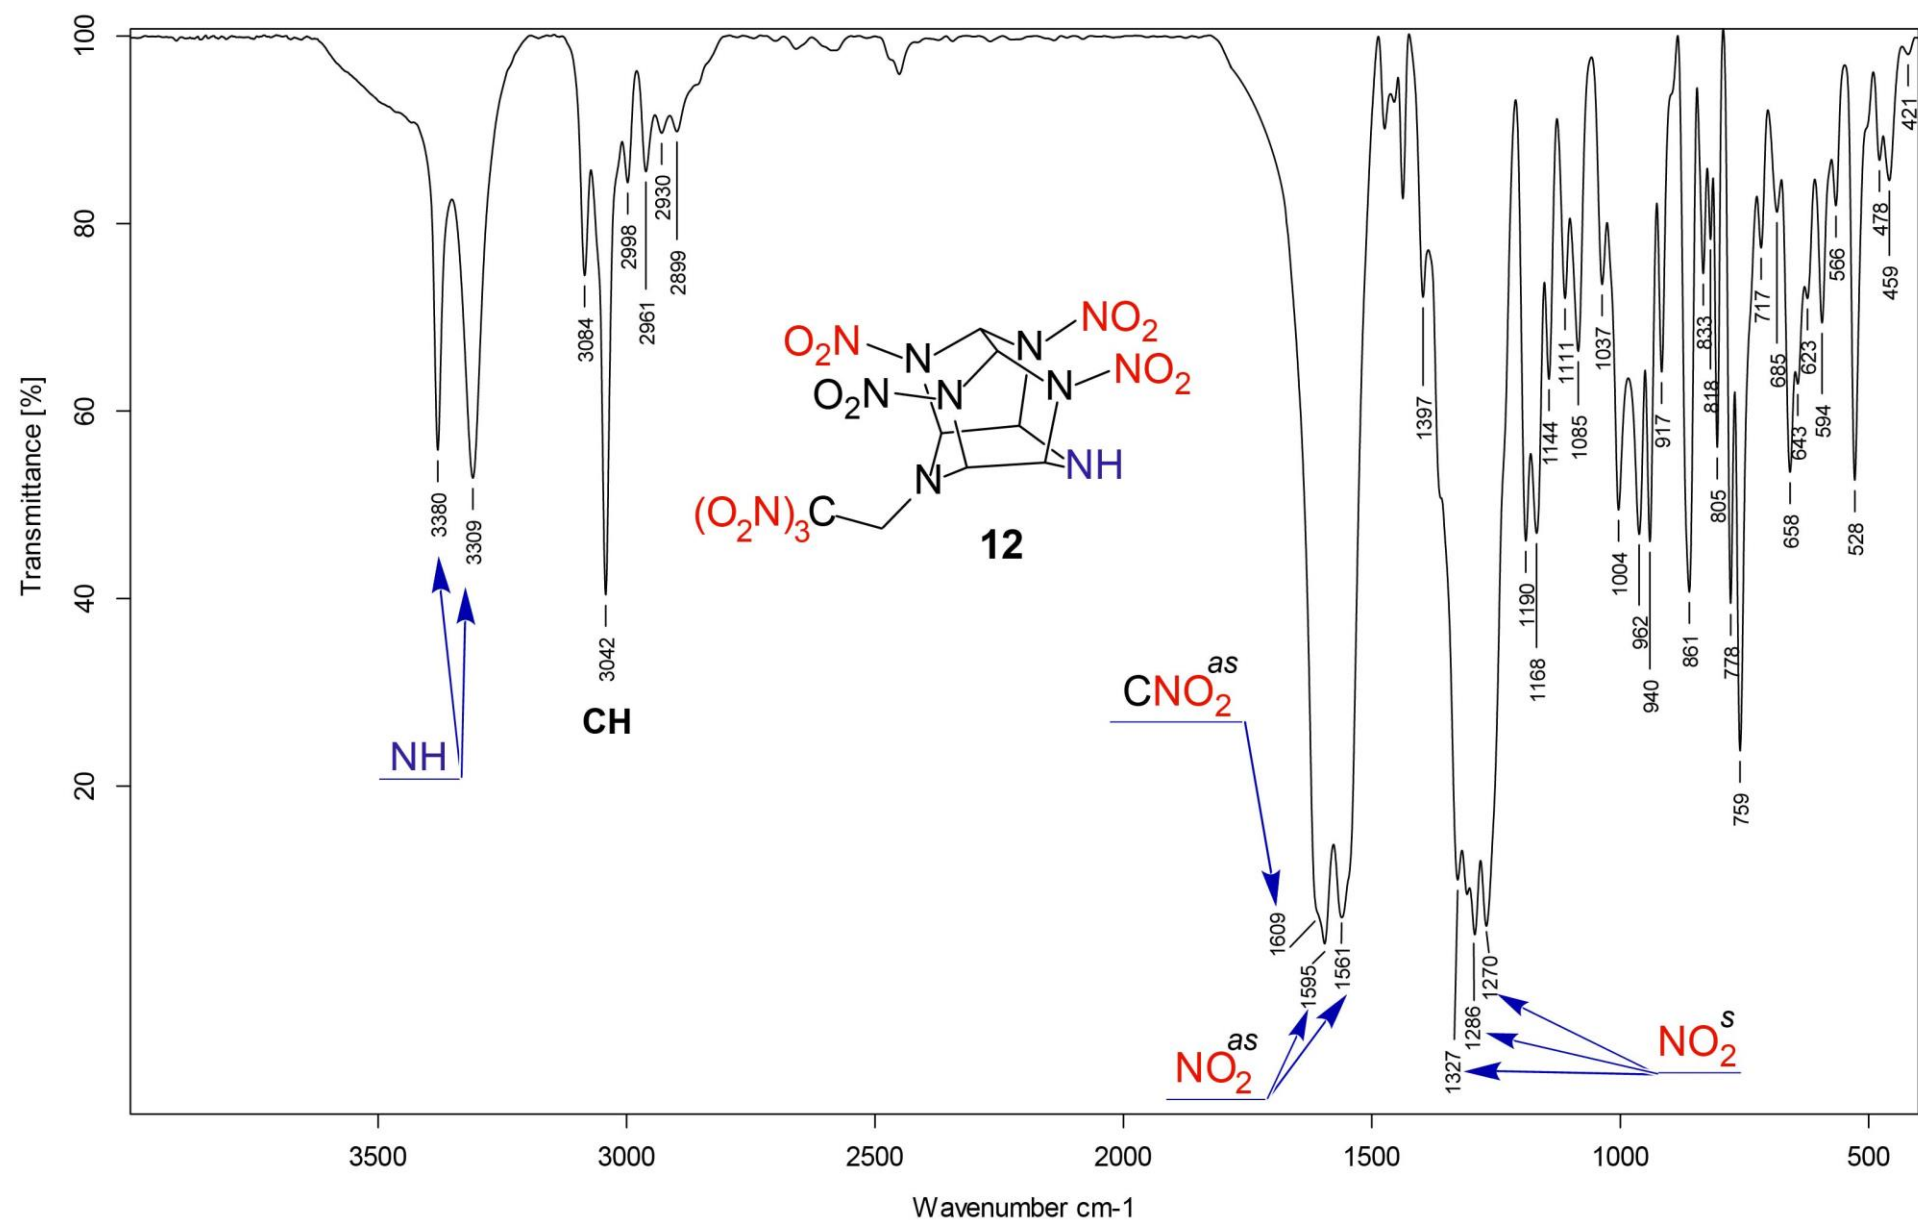

**$^1\text{H}$  NMR (300.1 MHz,  $[\text{D}_6]$ acetone) spectrum of compound 14**

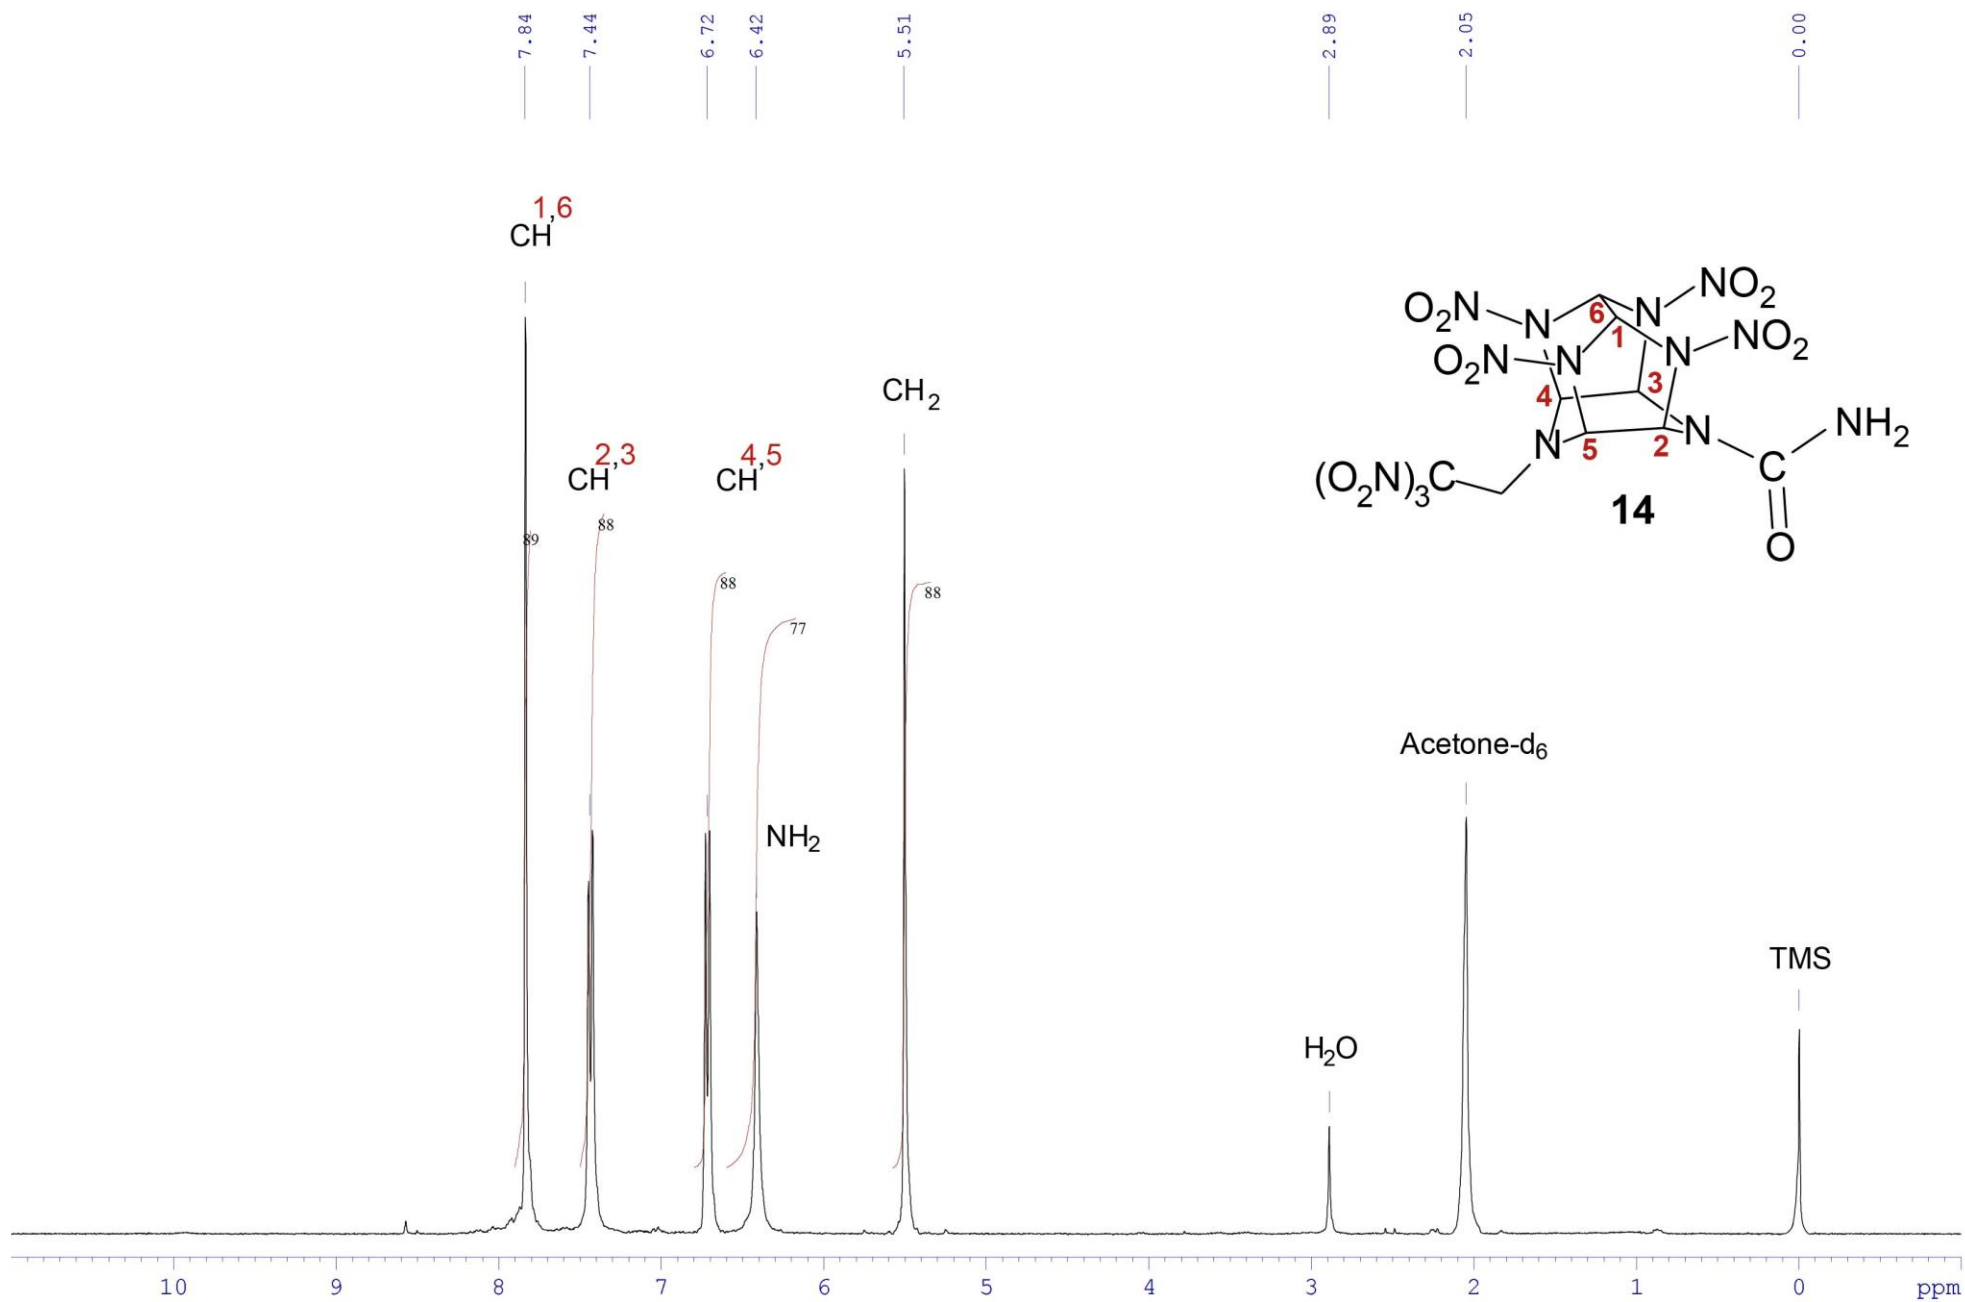

# <sup>13</sup>C NMR (75.5 MHz, [D<sub>6</sub>]acetone) spectrum of compound 14

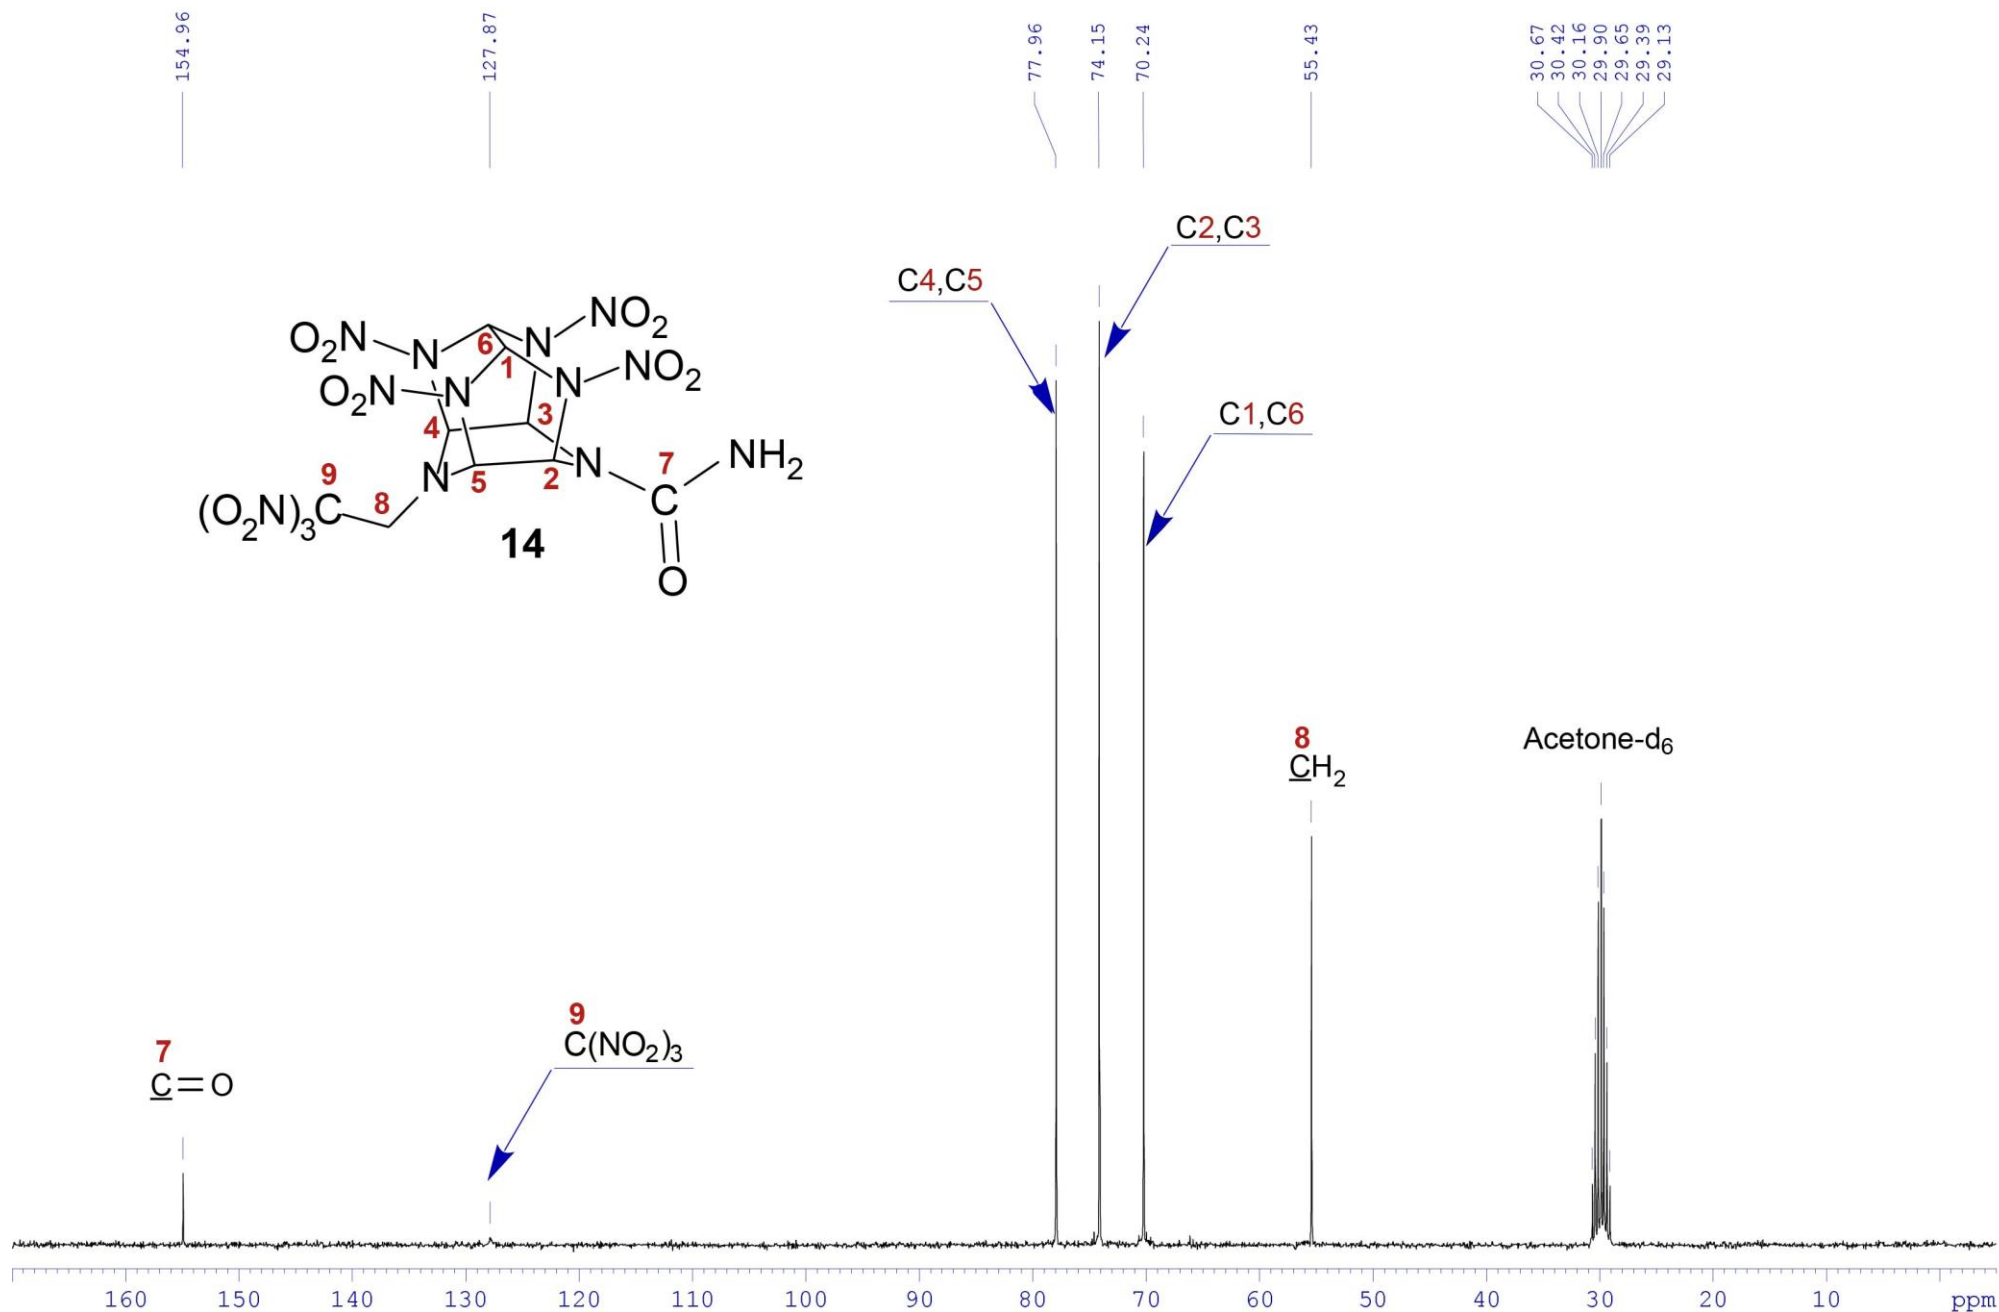

**$^{14}\text{N}$  NMR (21.7 MHz,  $[\text{D}_6]\text{acetone}$ ) spectrum of compound 14**

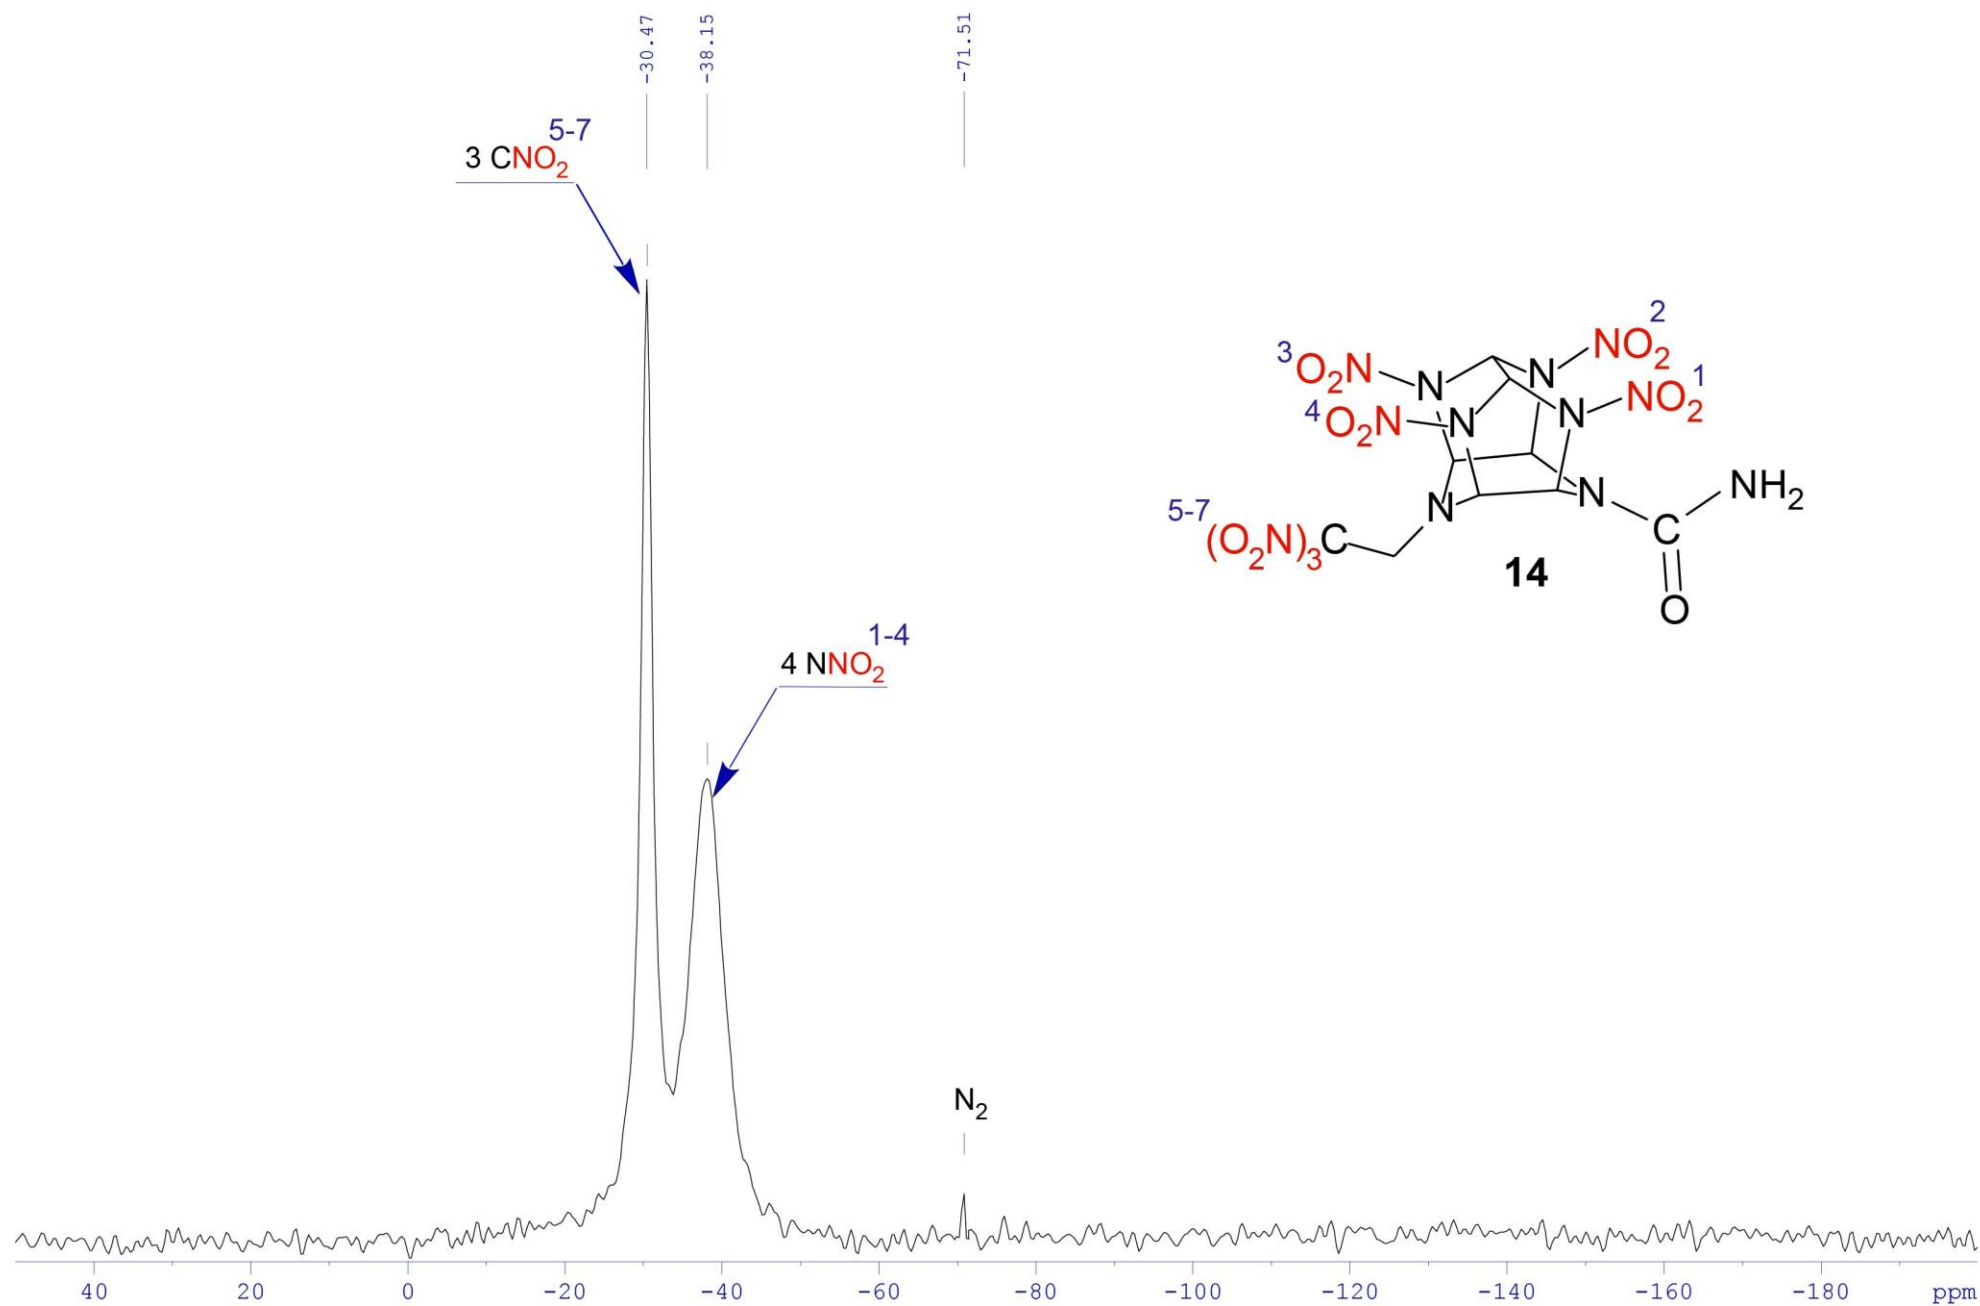

# IR (KBr) spectrum of compound 14

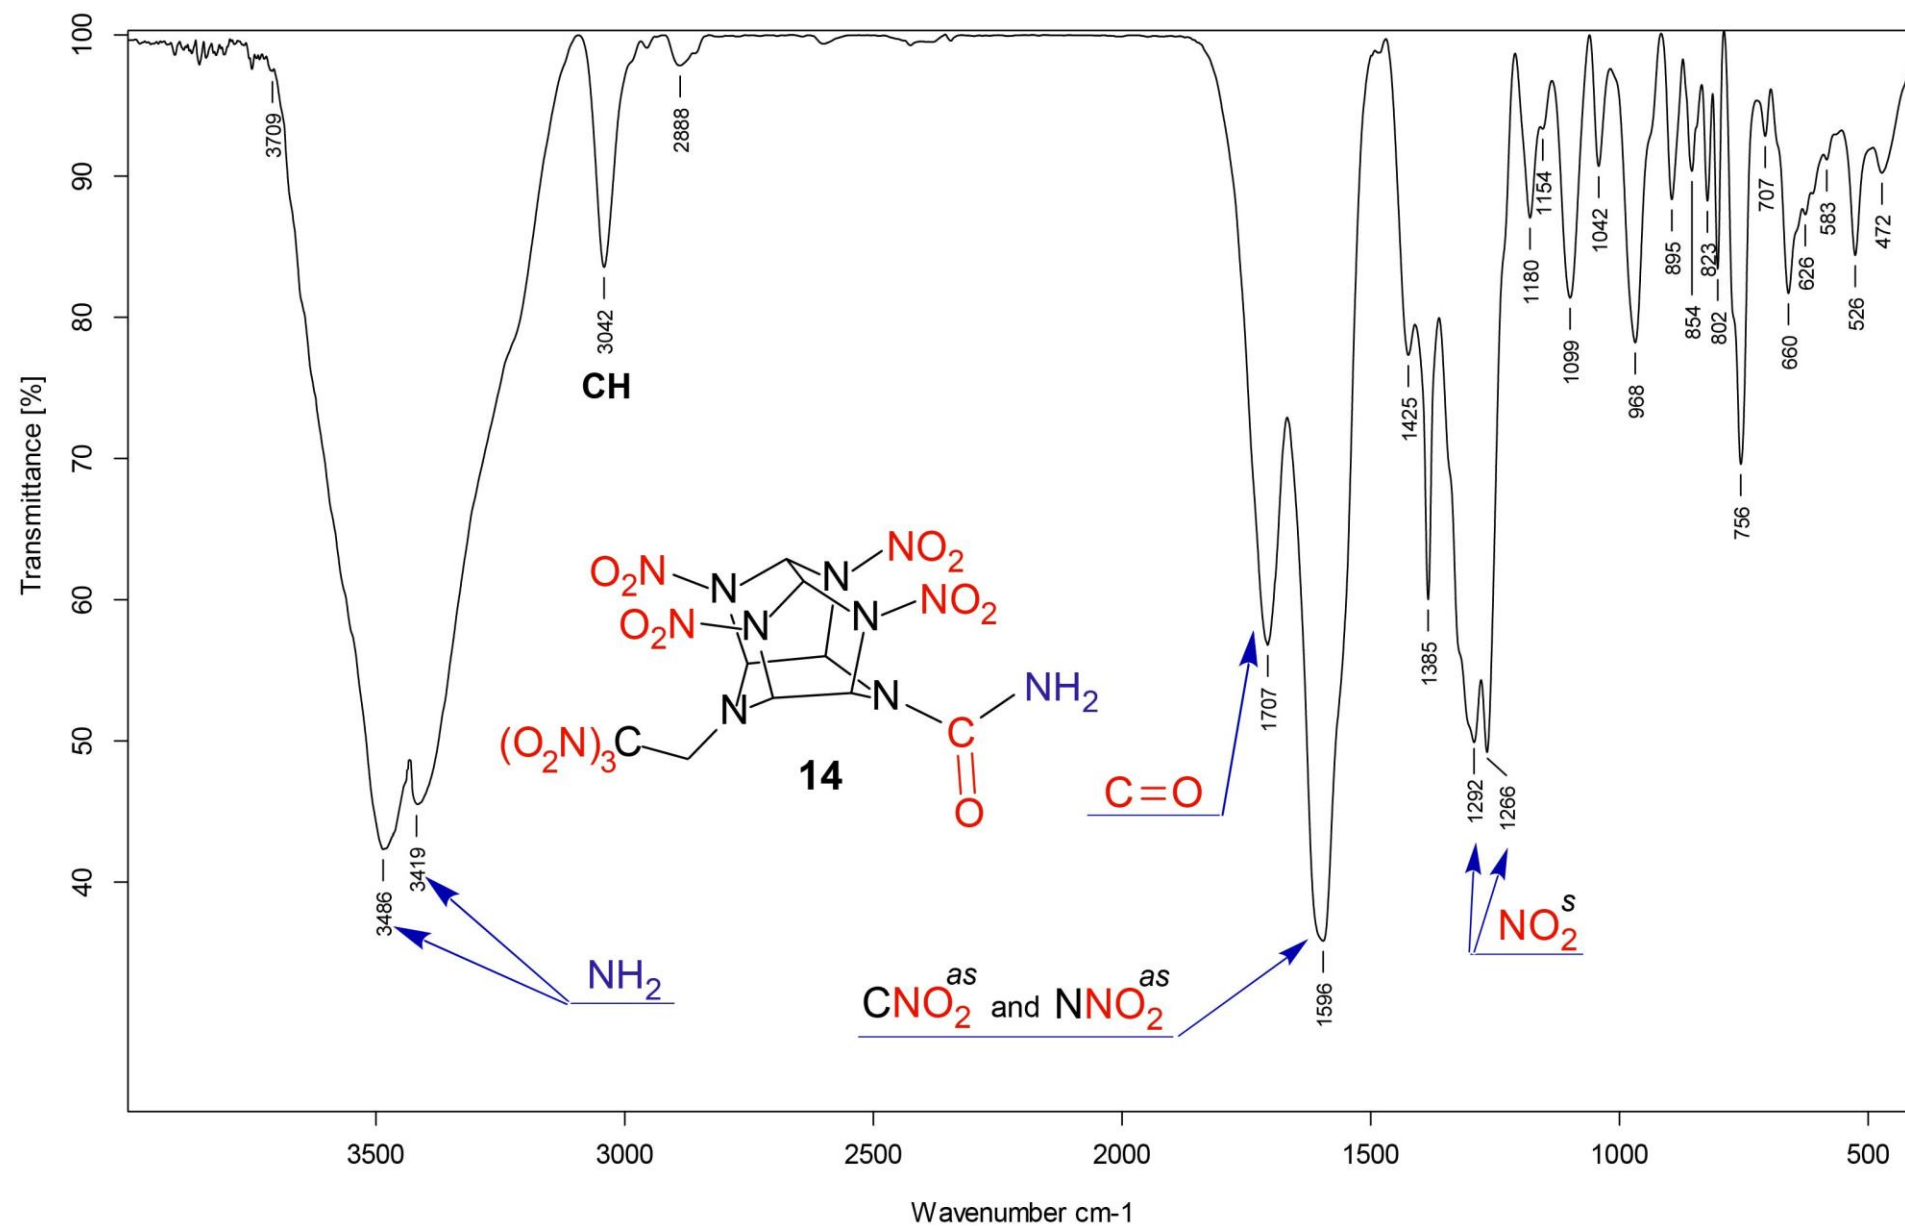

# HRMS (ESI) for compound 14

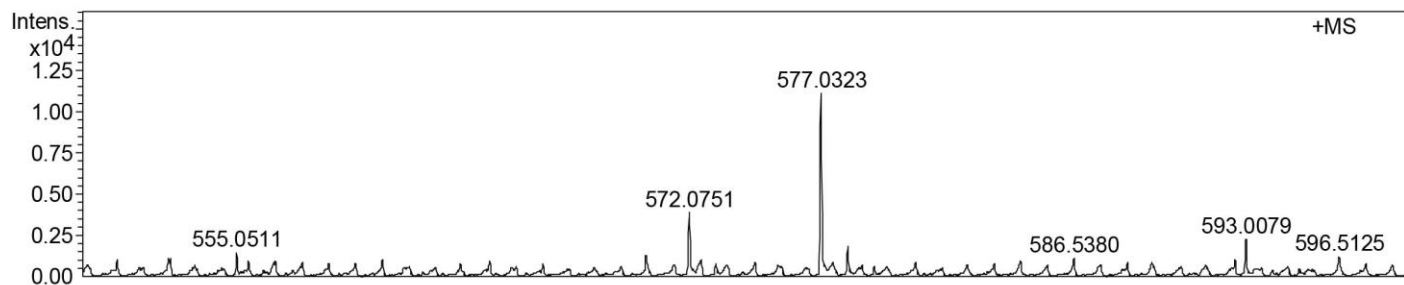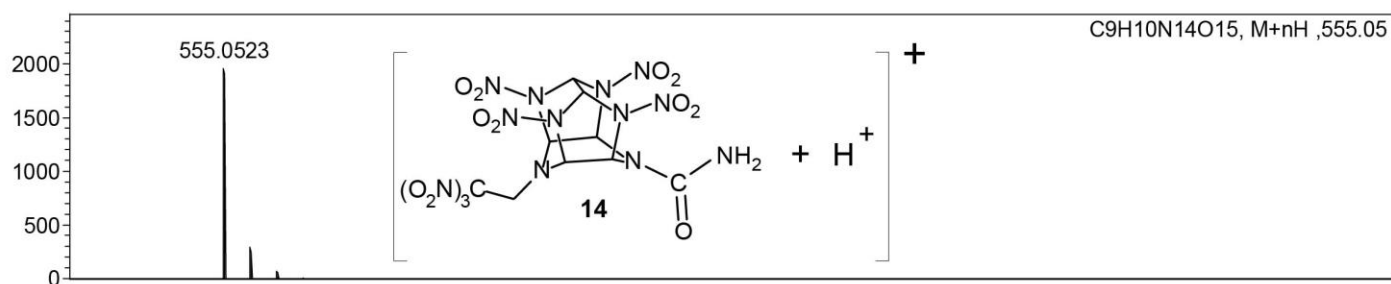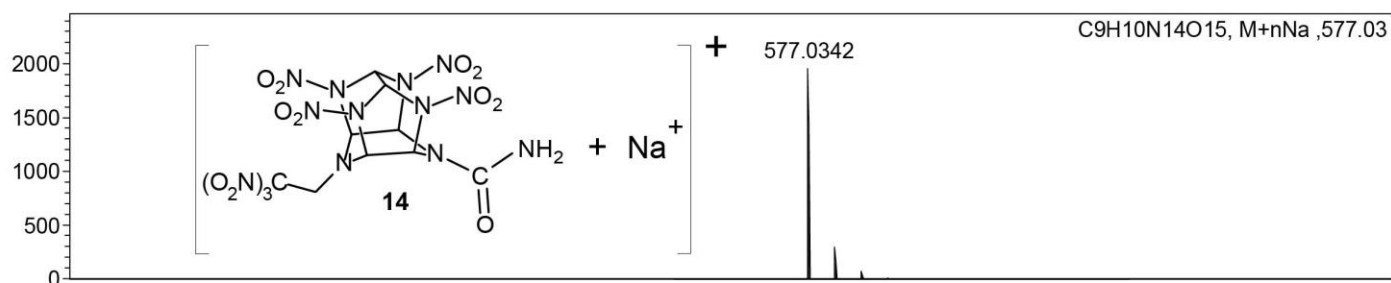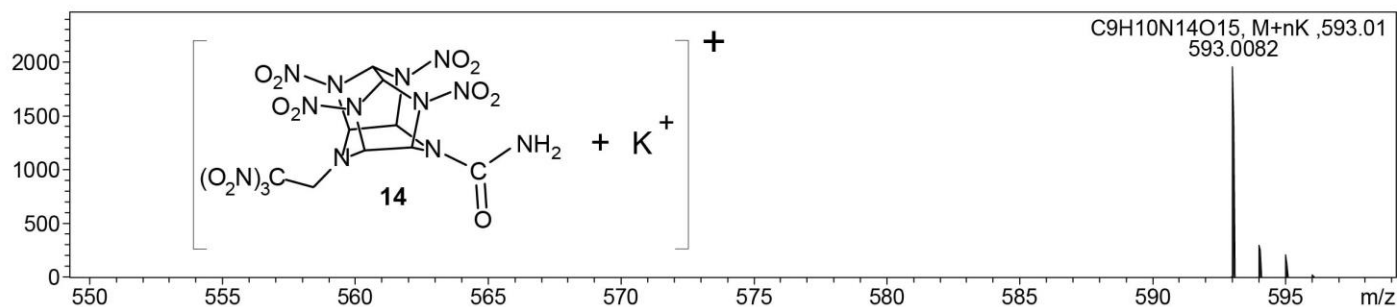

**$^1\text{H}$  NMR (600.13 MHz,  $[\text{D}_6]$ acetone) spectrum of compound 15**

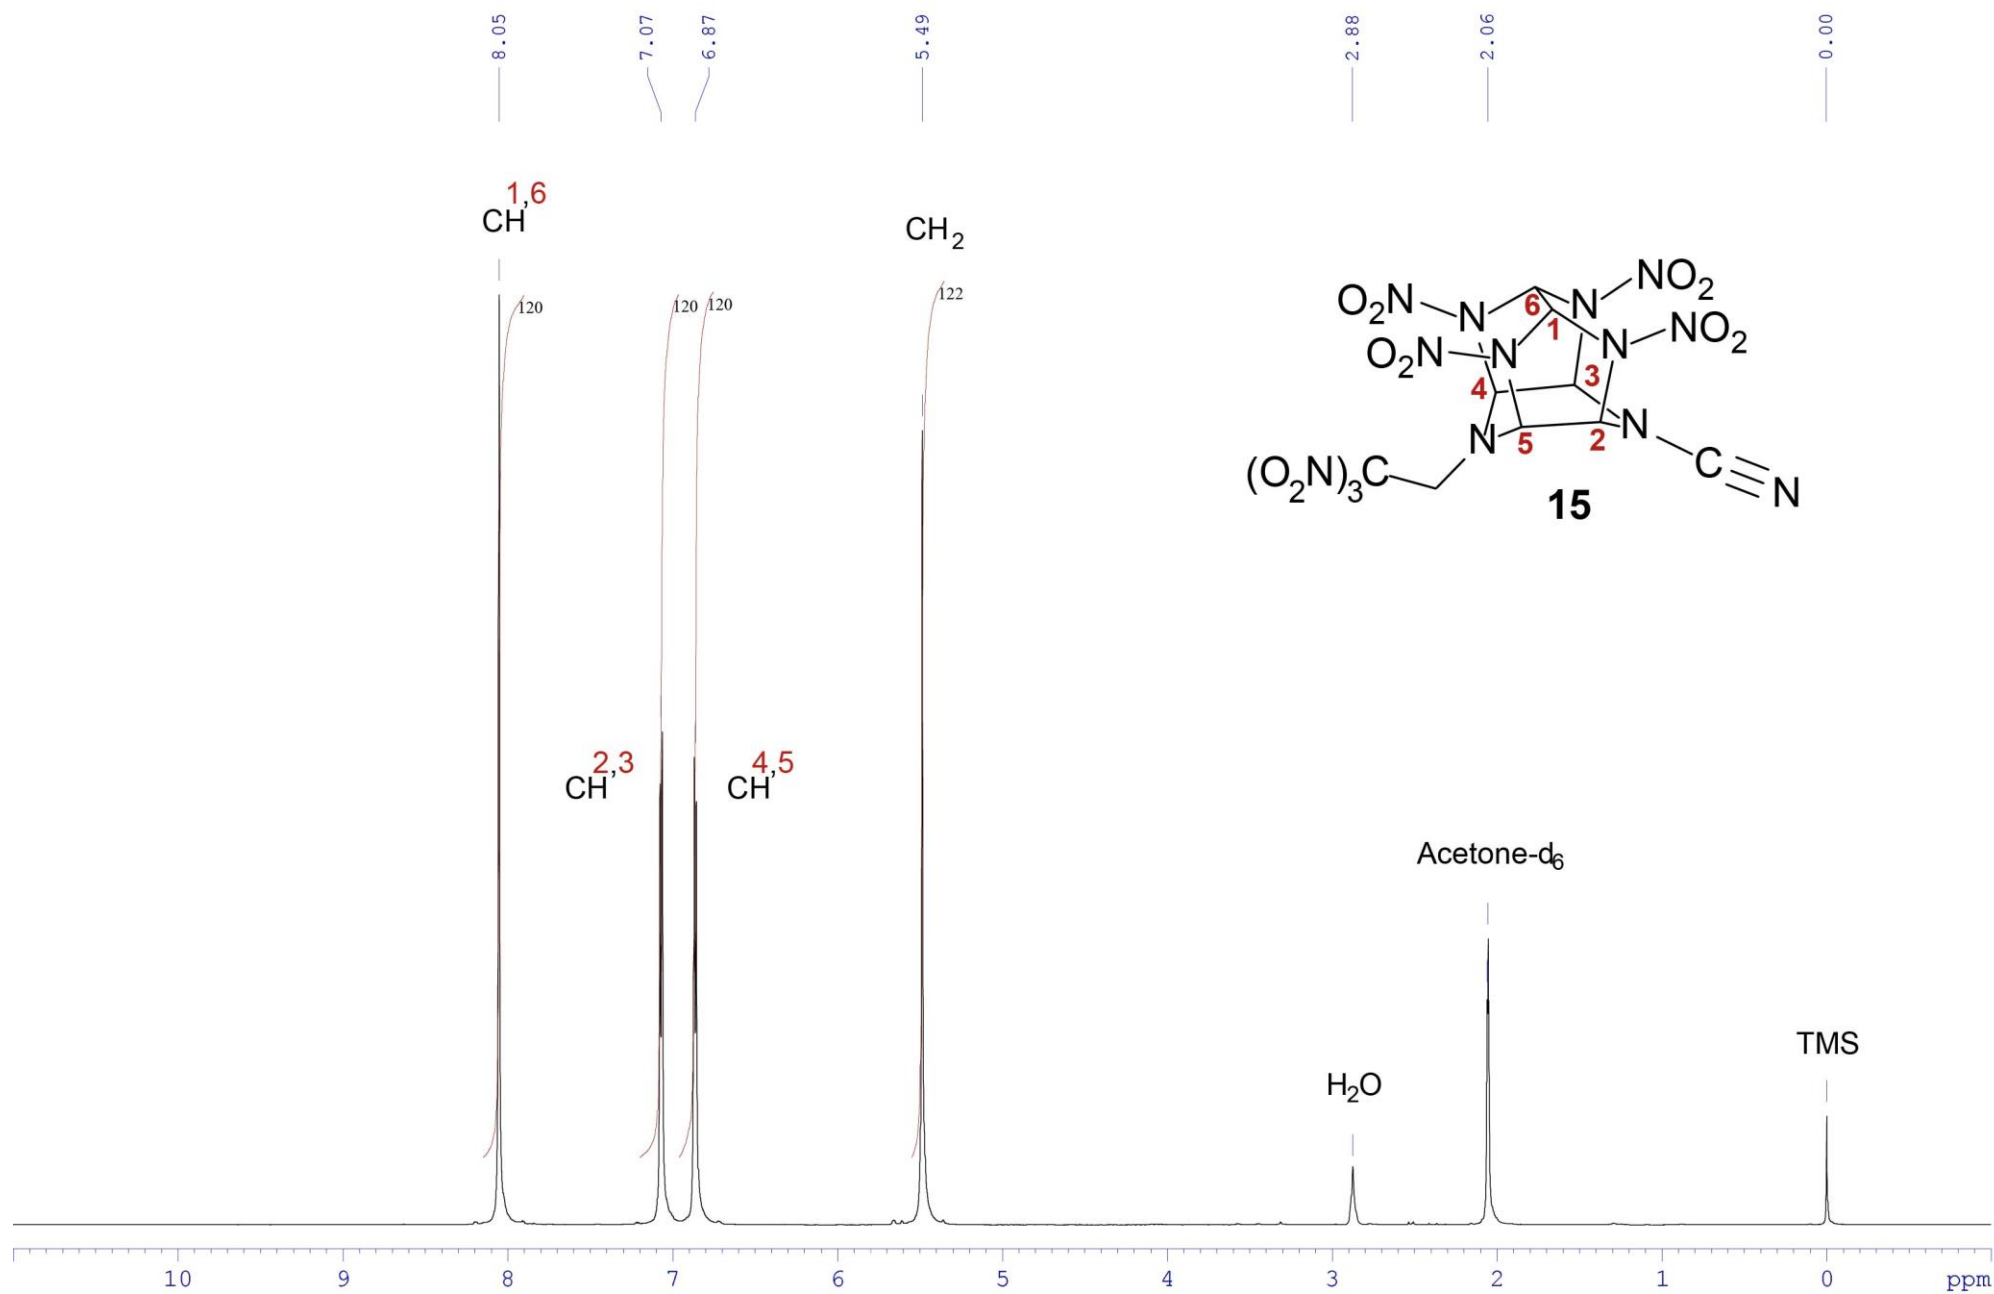

**$^{13}\text{C}$  NMR (150.9 MHz,  $[\text{D}_6]$ acetone) spectrum of compound 15**

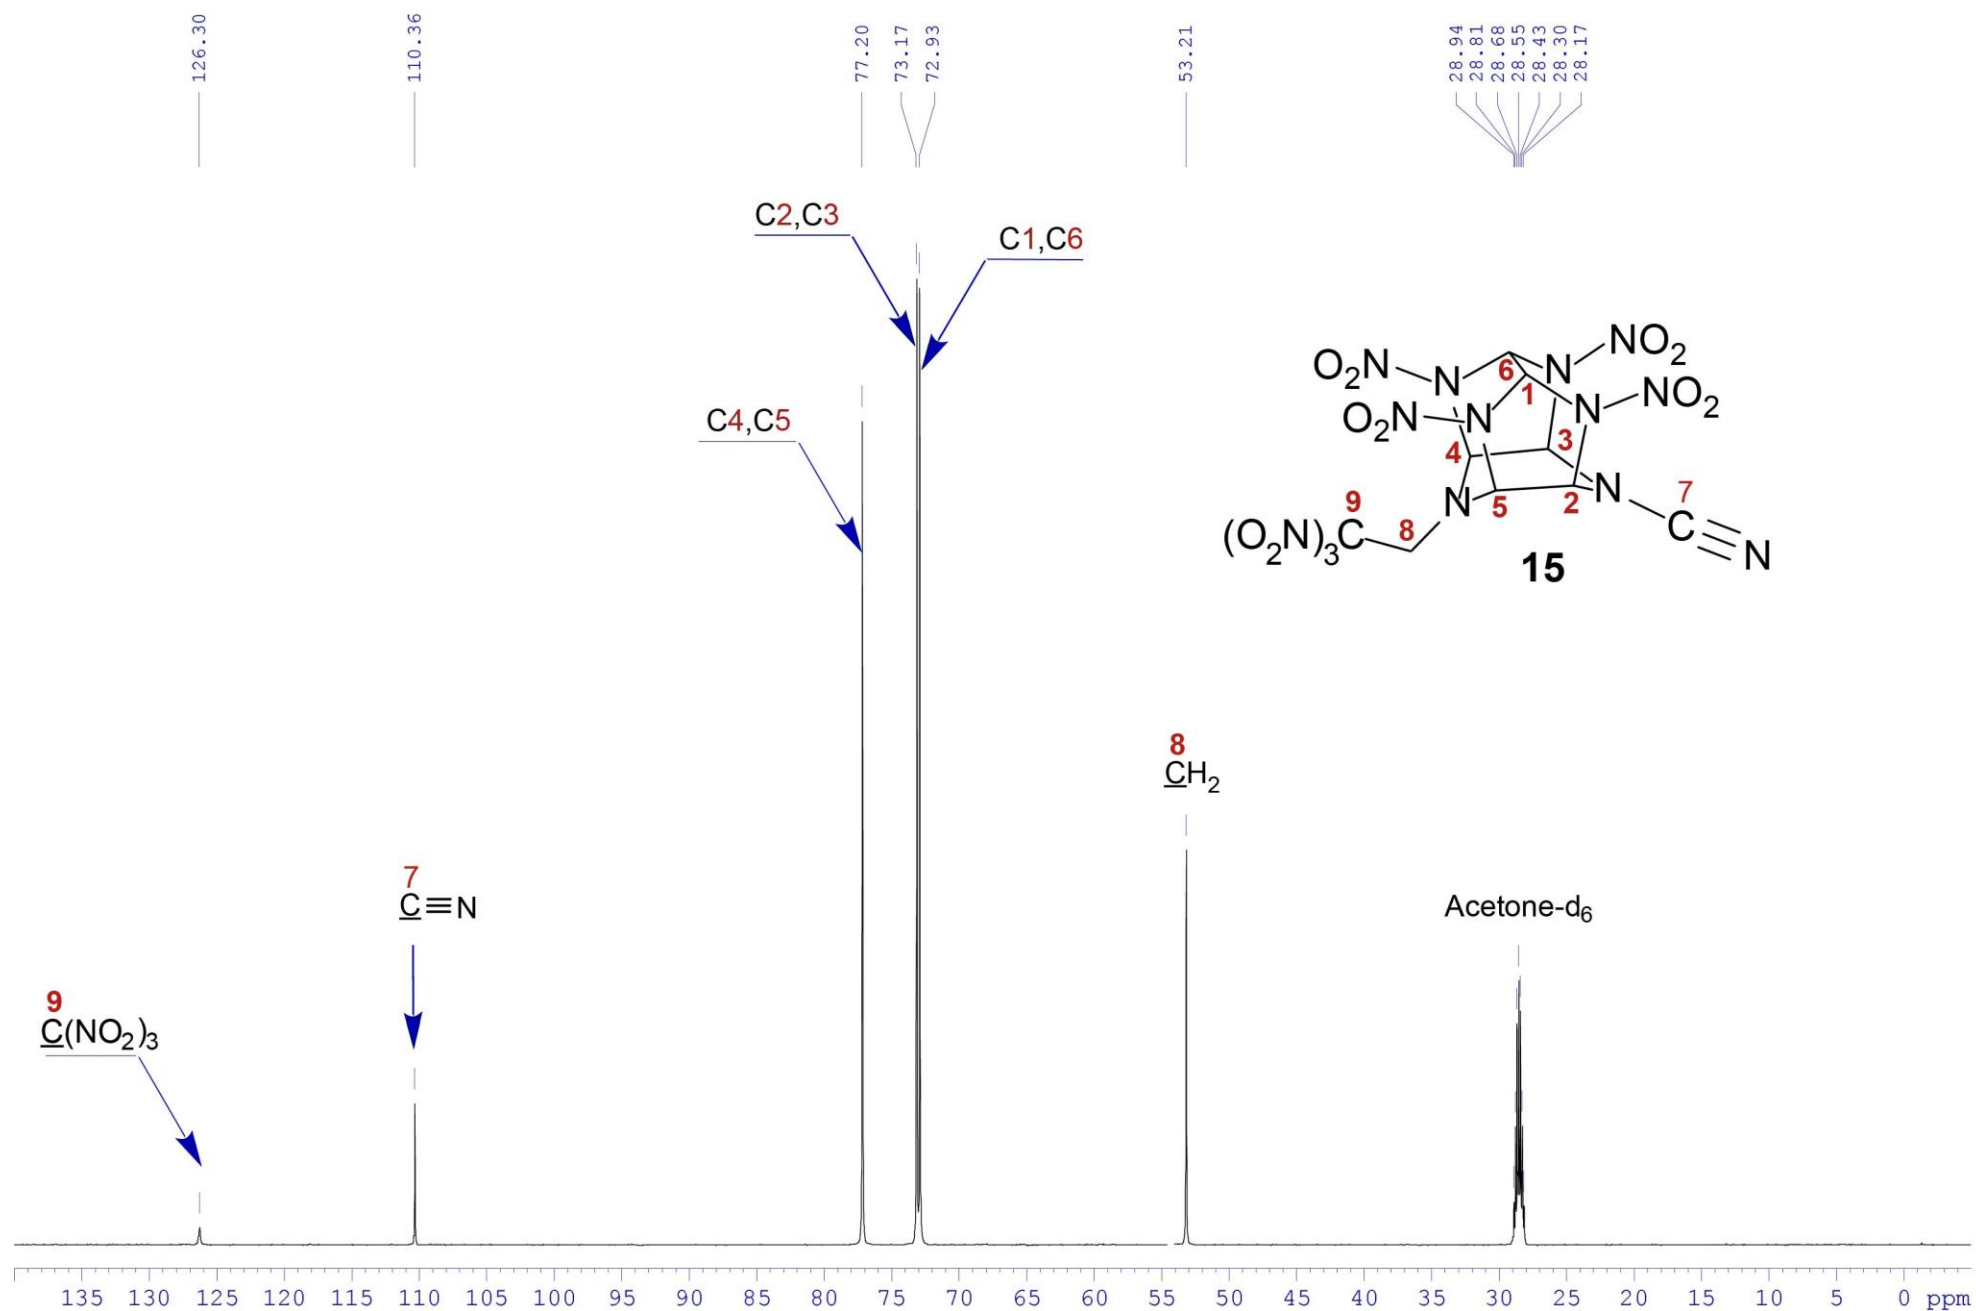

**{<sup>1</sup>H–<sup>13</sup>C} HSQC NMR (600.13 MHz, [D<sub>6</sub>]acetone) spectrum of compound 15**

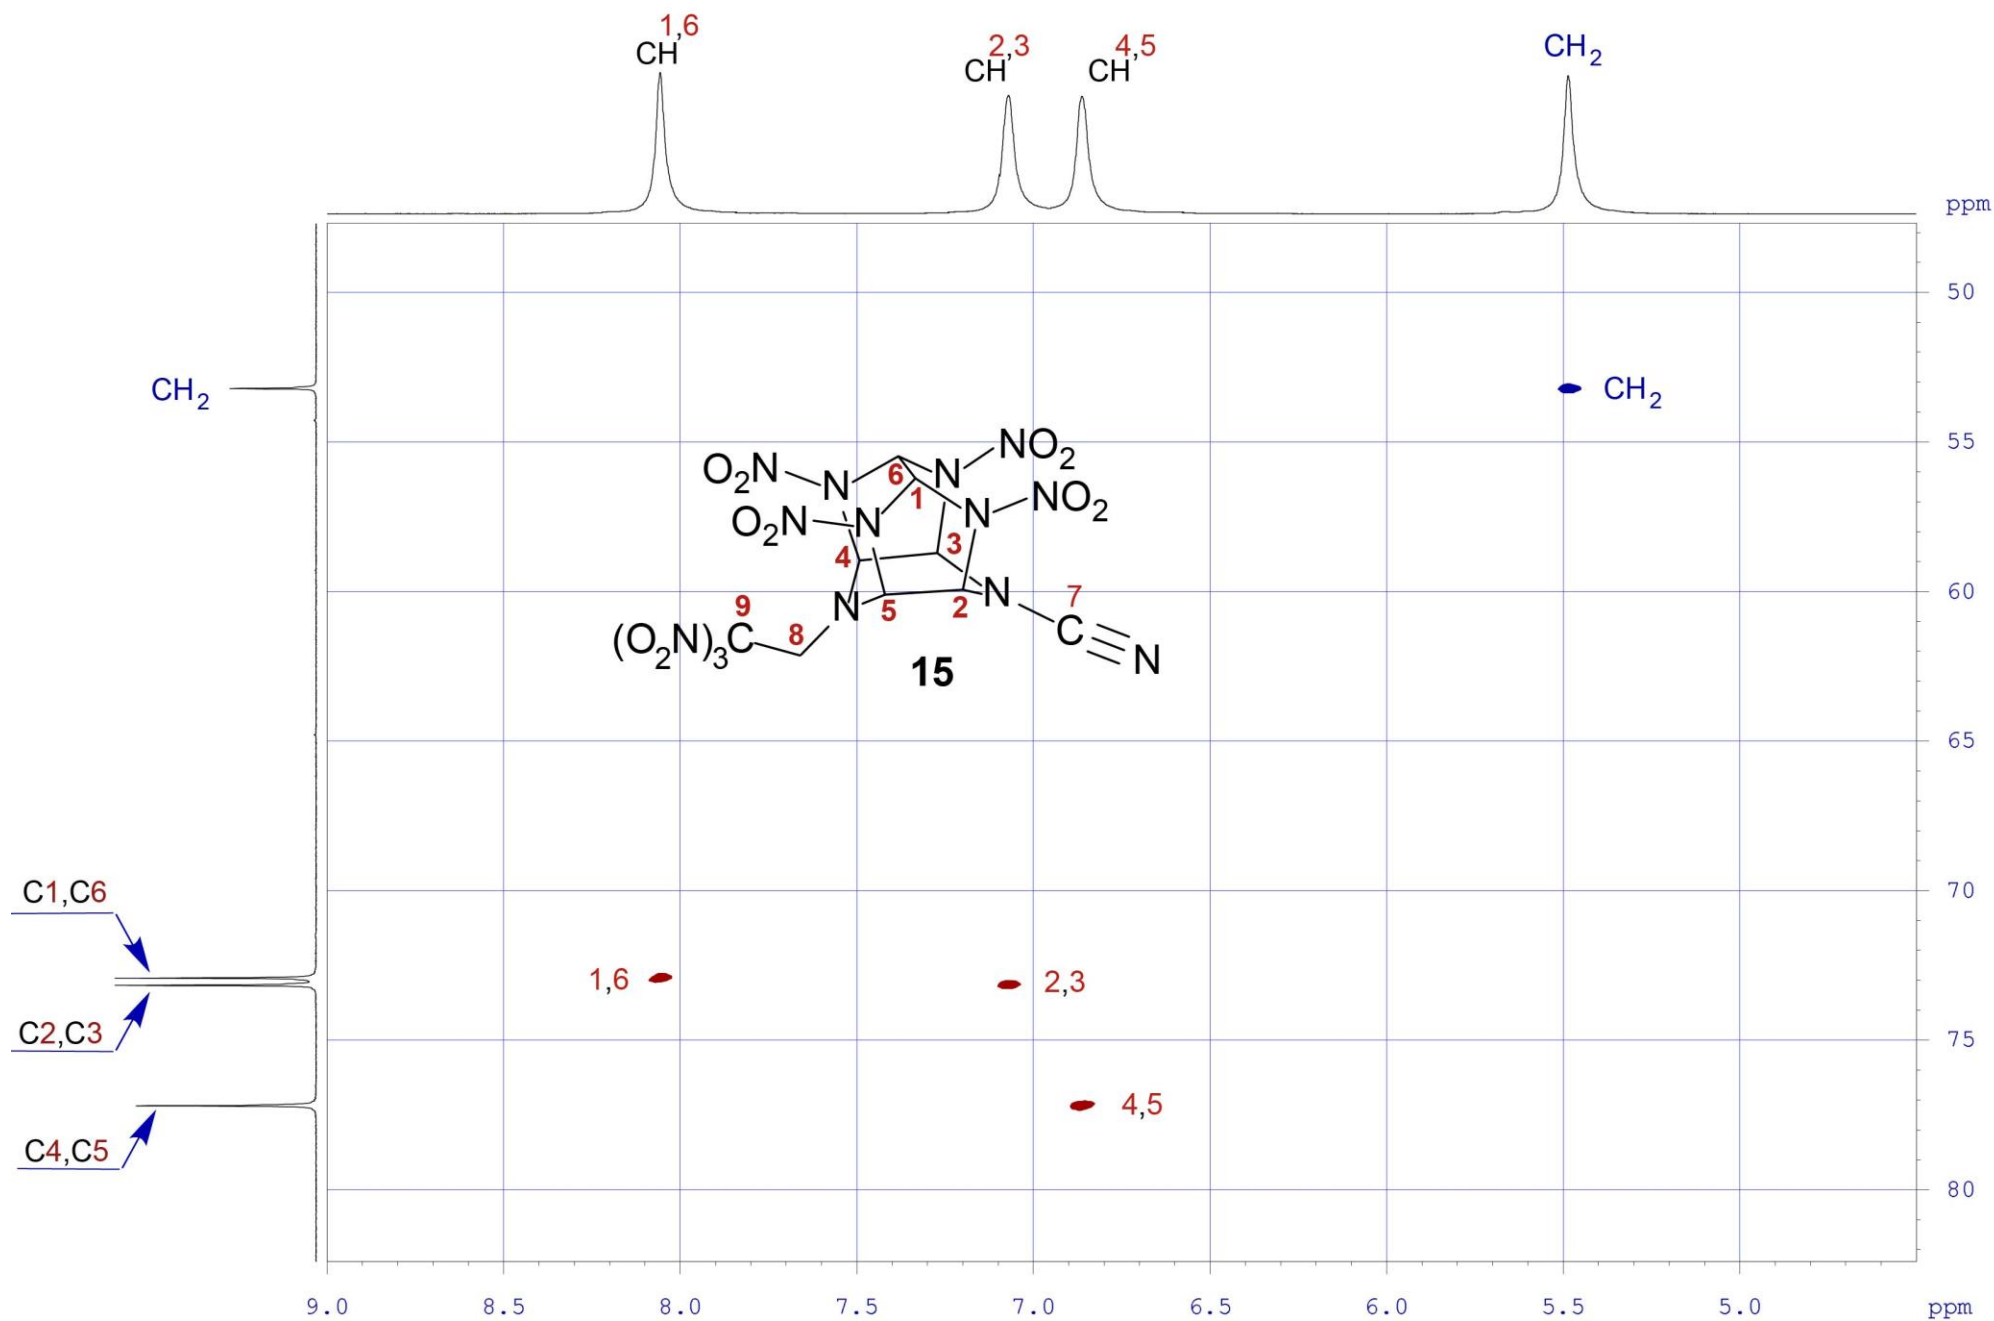

**$\{^1\text{H}-^{13}\text{C}\}$  HMBC NMR (600.13 MHz,  $[\text{D}_6]\text{acetone}$ ) spectrum of compound 15**

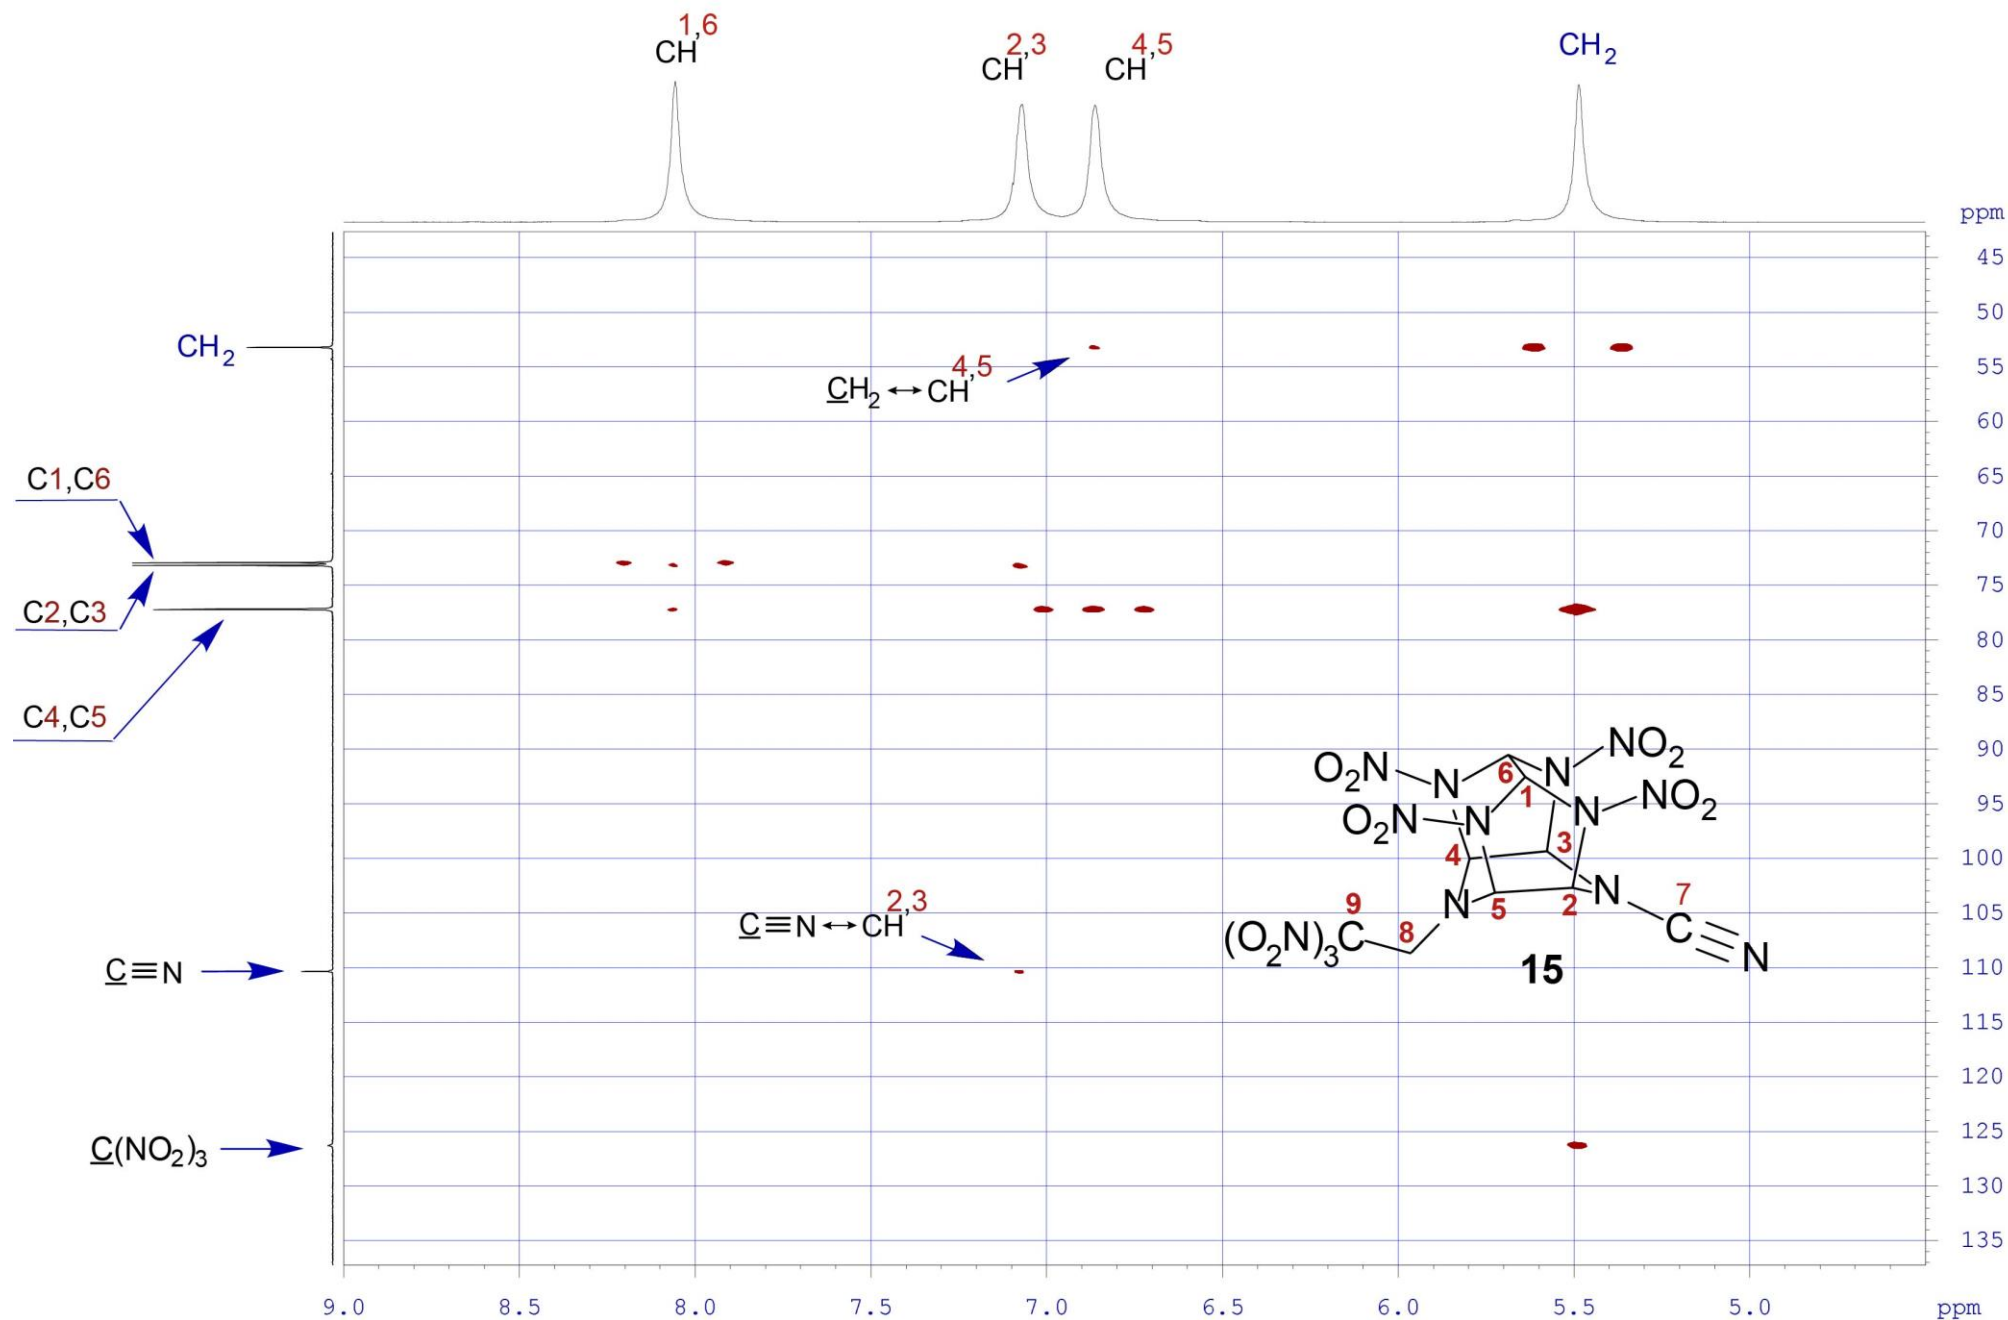

**$^{14}\text{N}$  NMR (43.37 MHz,  $[\text{D}_6]$ acetone) spectrum of compound 15**

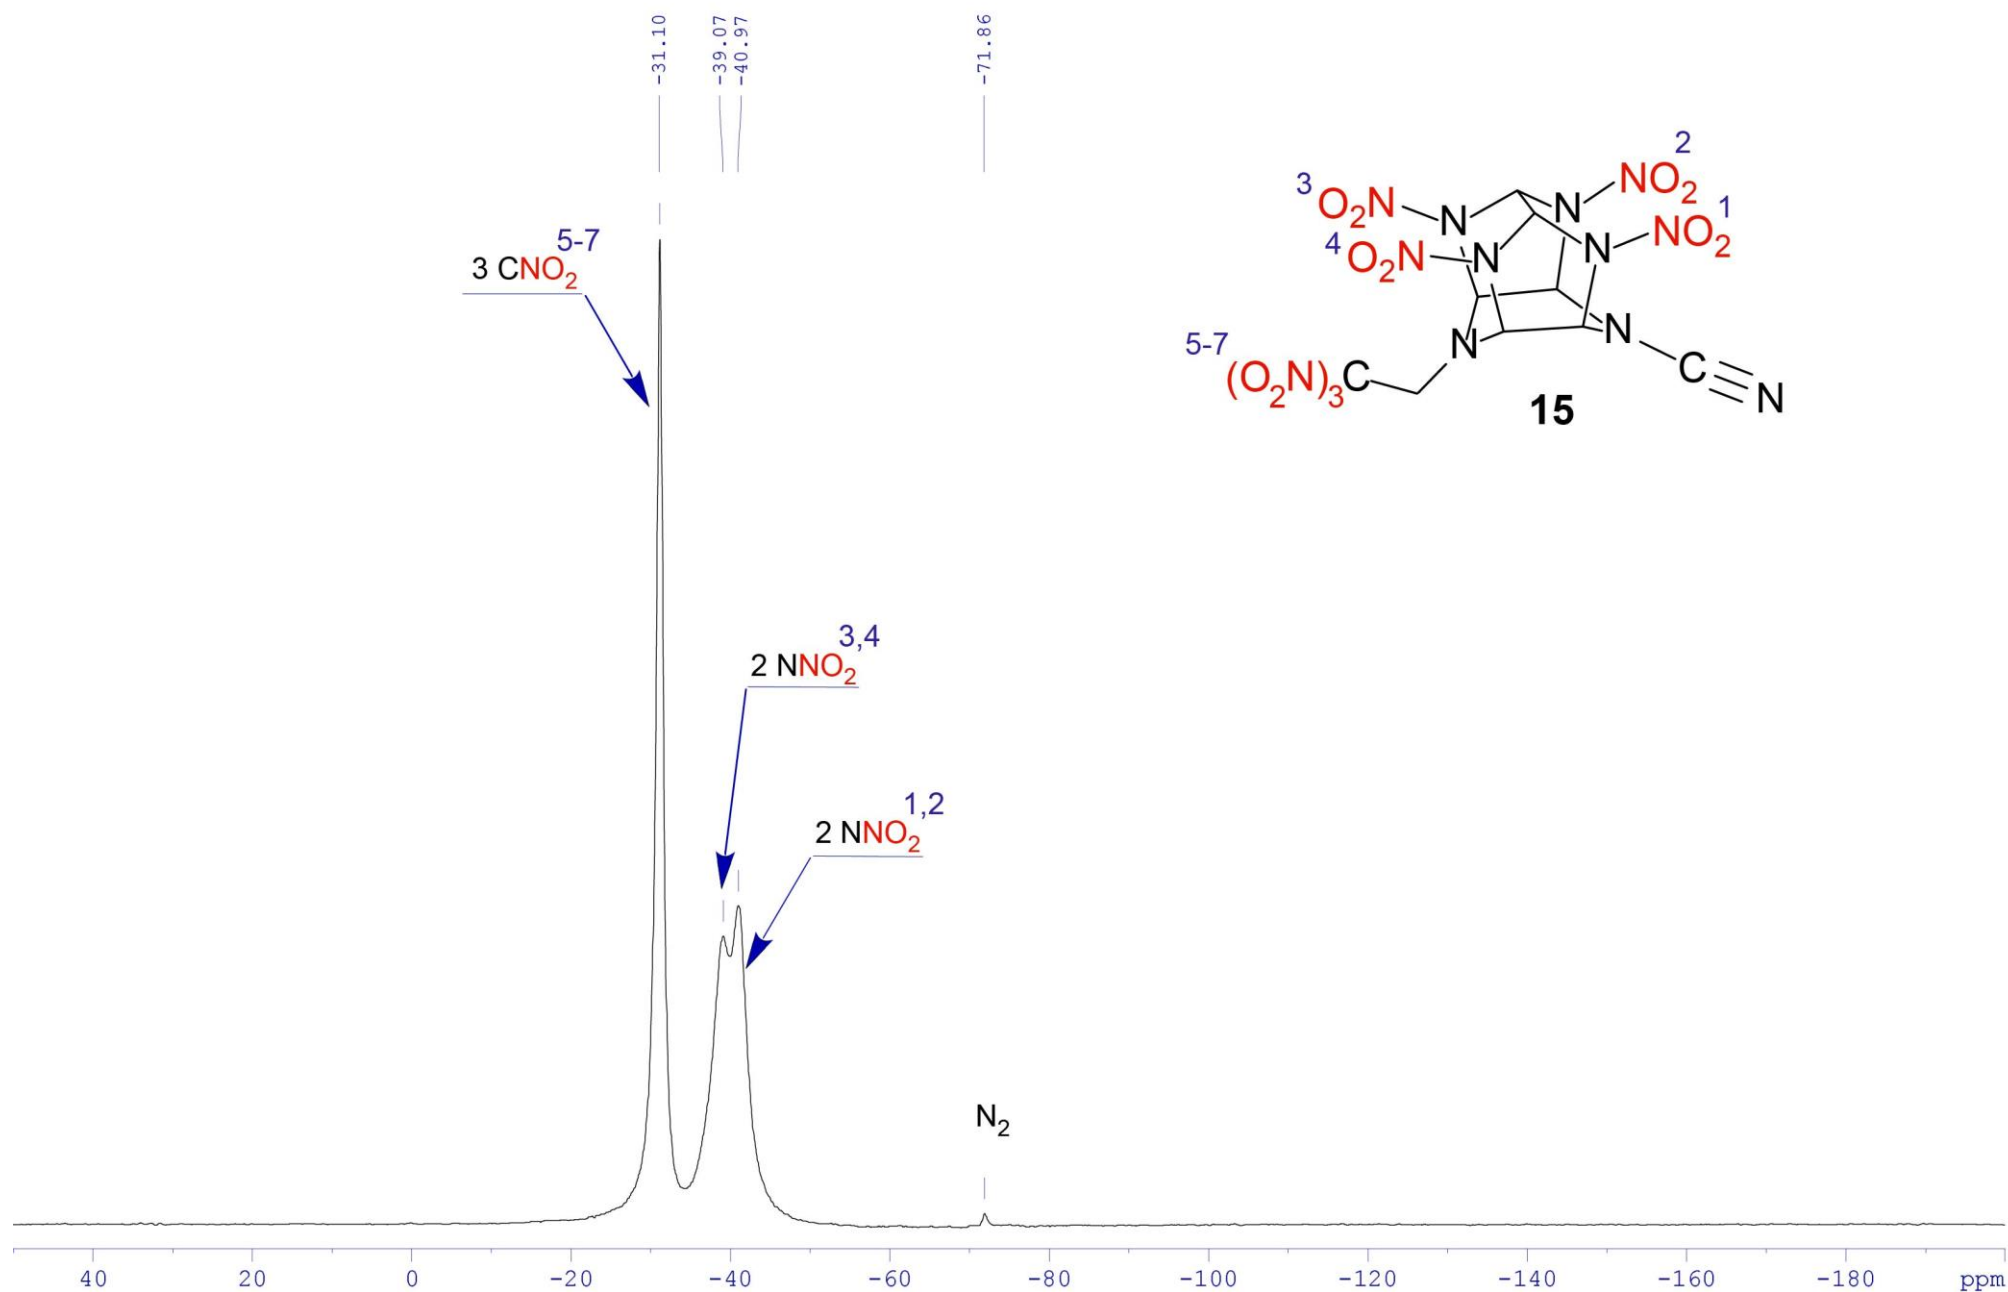

**$^{15}\text{N}$  NMR ([INVGATED], [INEPT], 60.8 MHz,  $[\text{D}_6]\text{acetone}$ ) spectrum of compound 15**

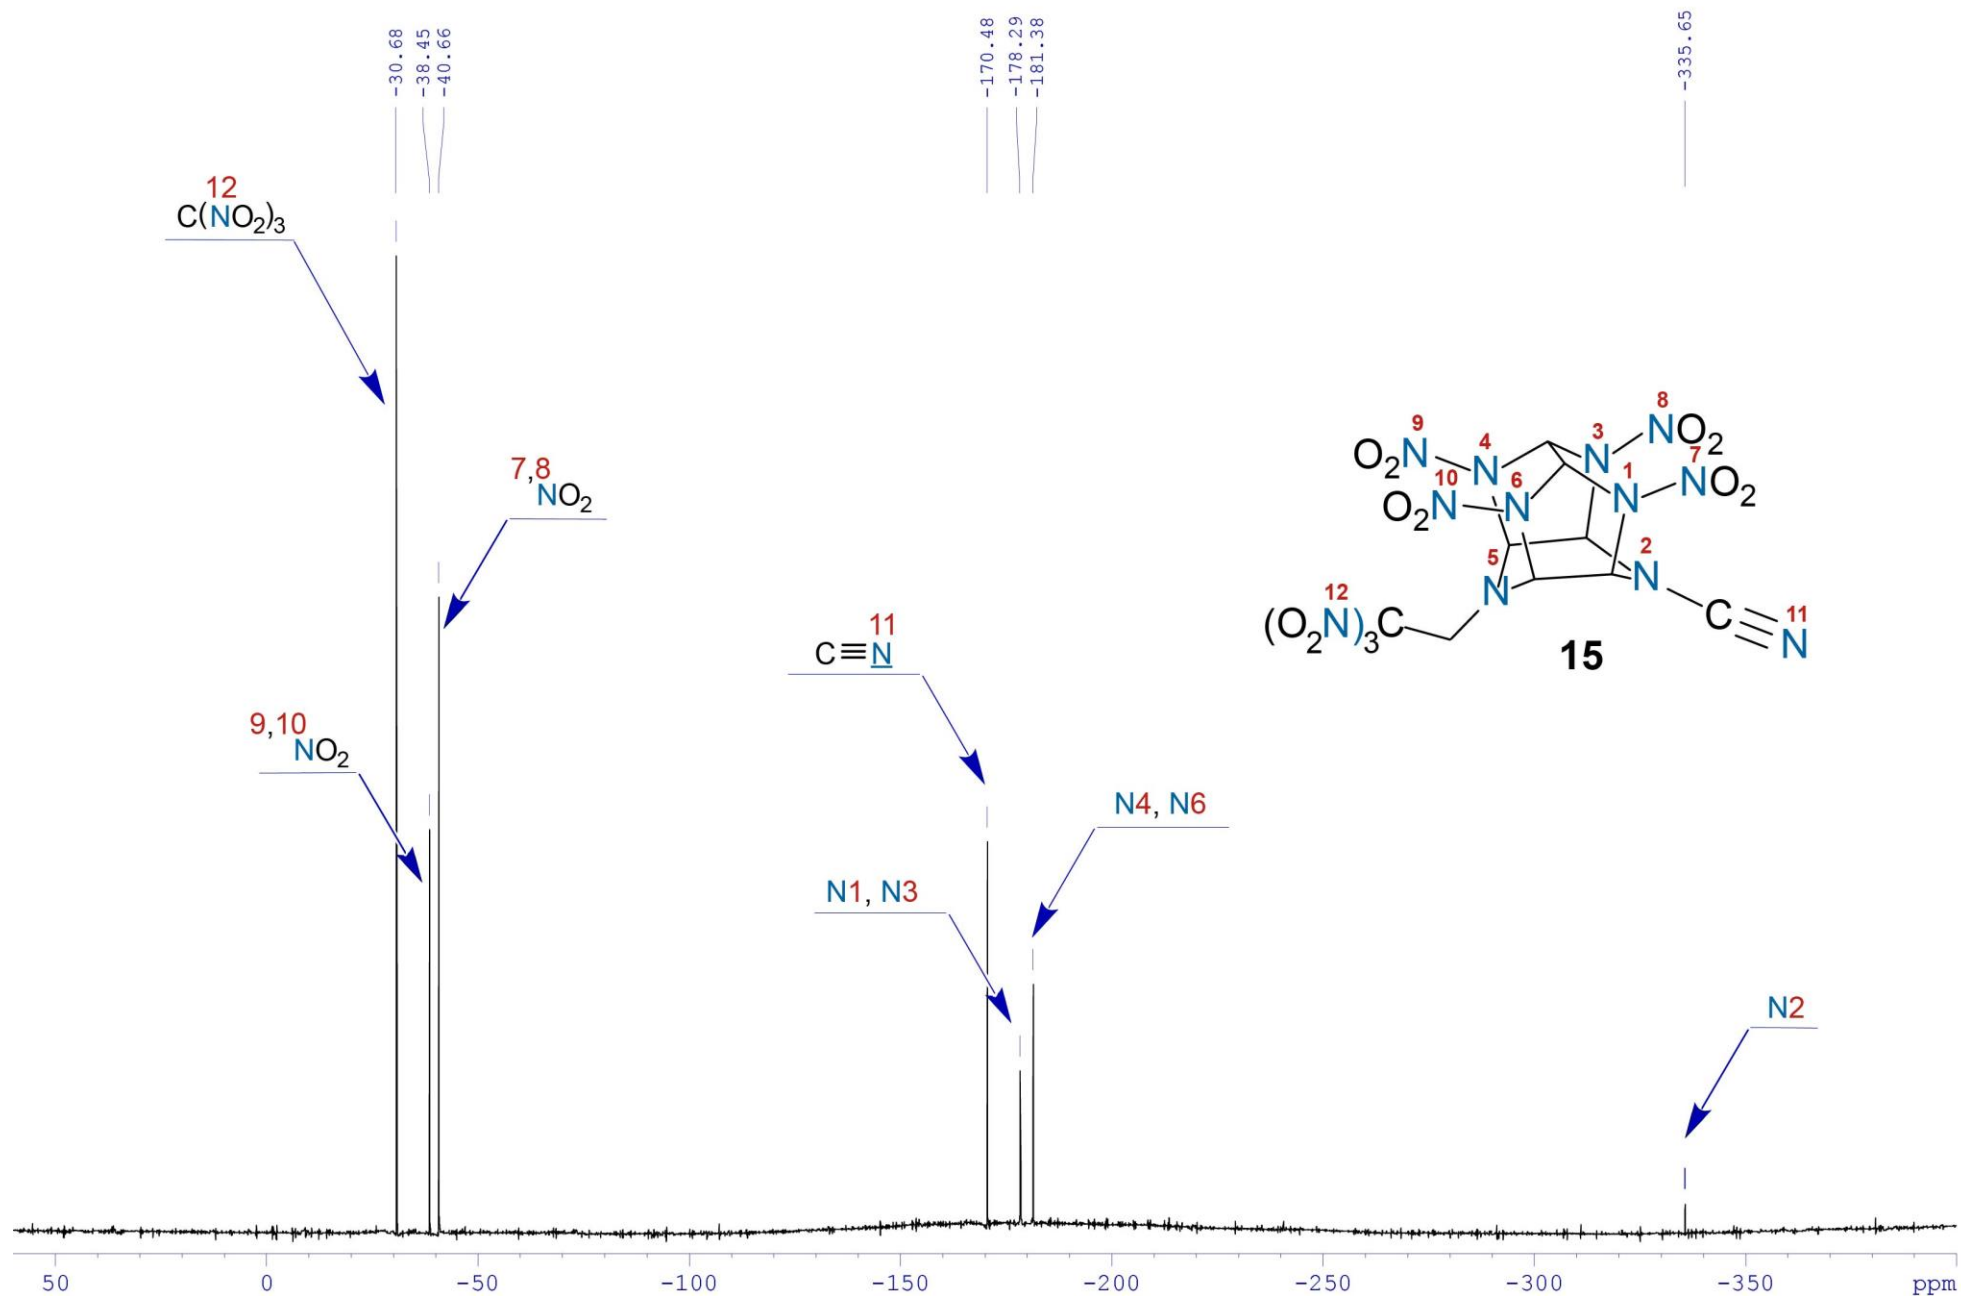

**$\{^1\text{H}-^{15}\text{N}\}$  HSQC NMR (600.13 MHz,  $[\text{D}_6]\text{acetone}$ ) spectrum of compound 15**

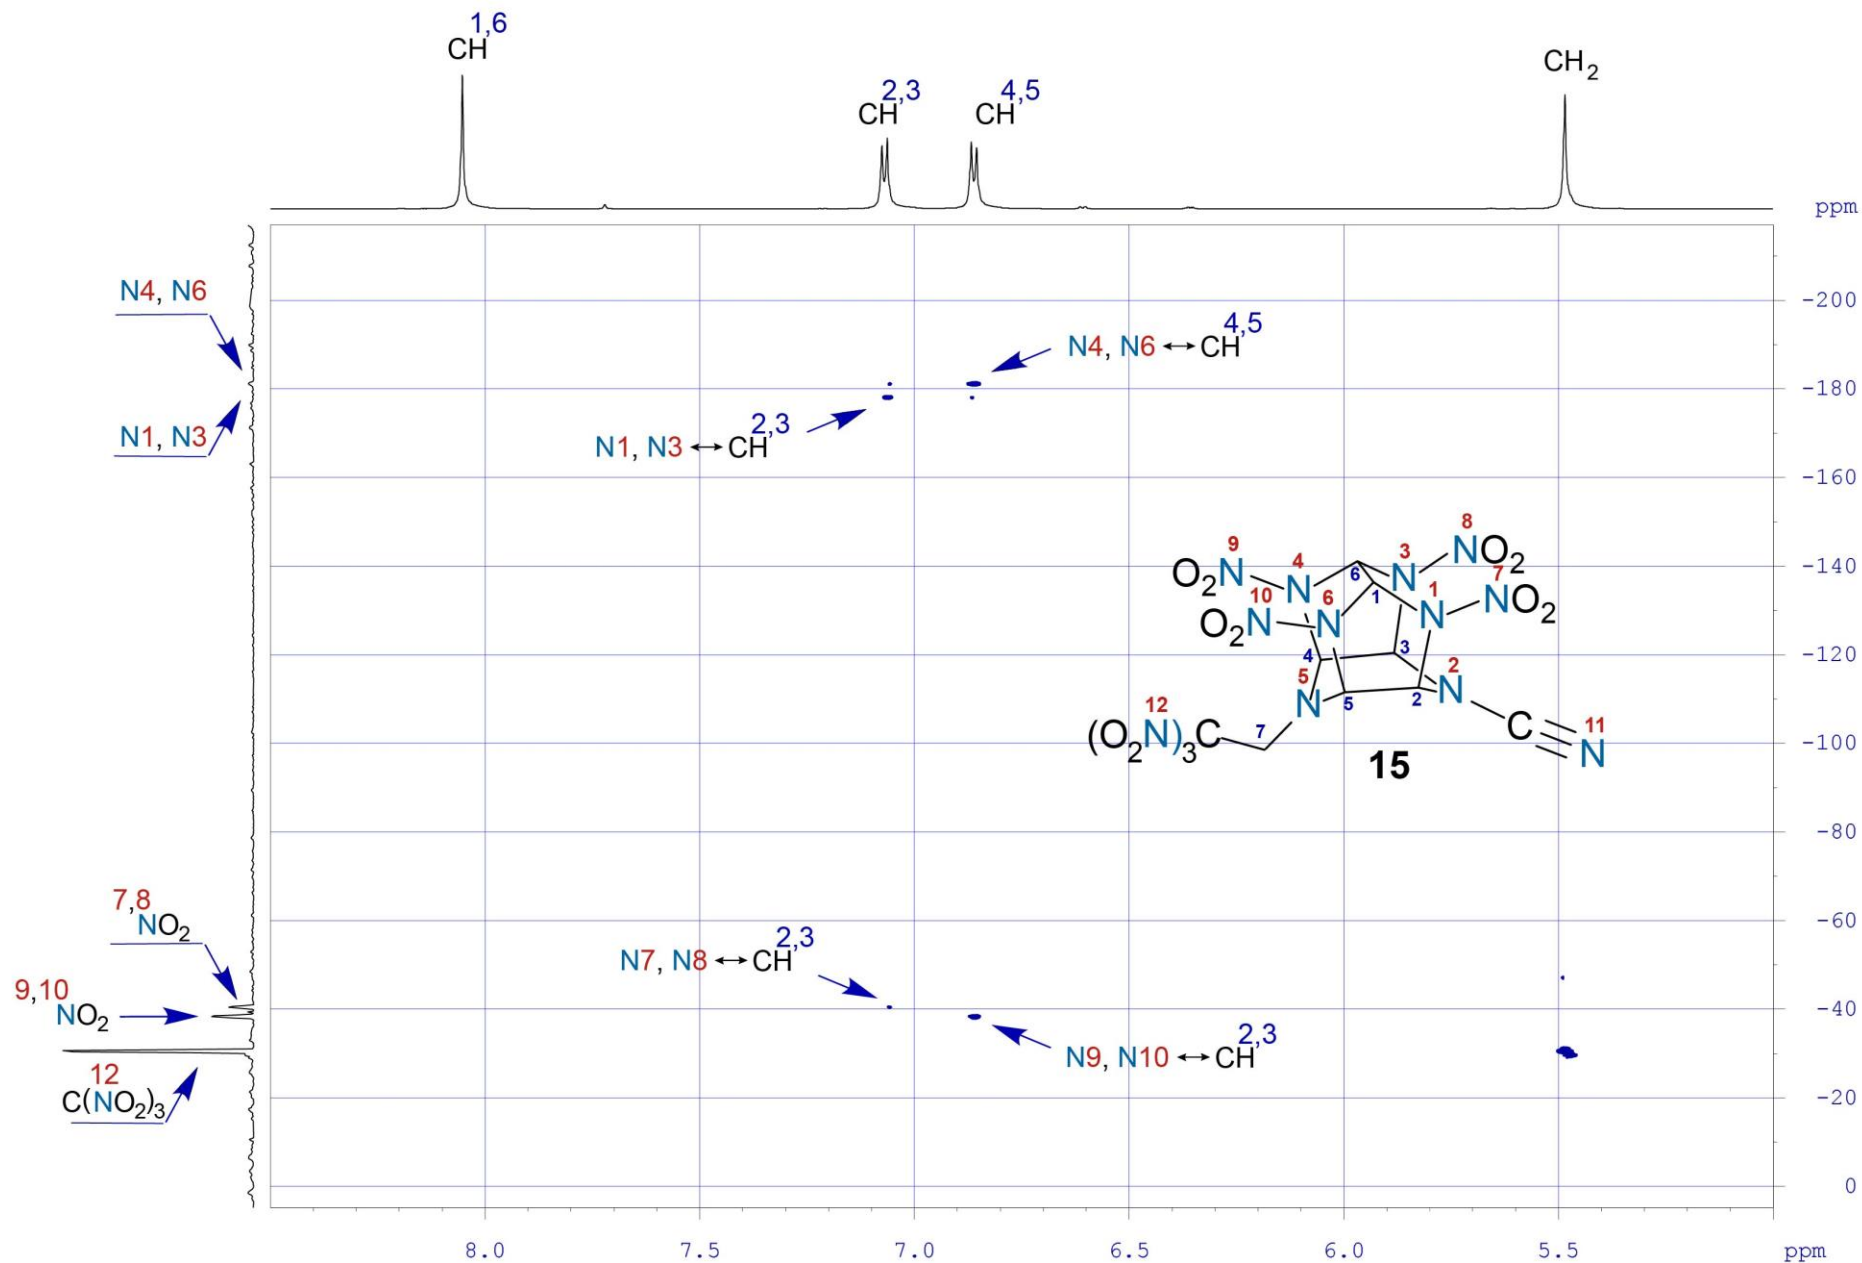

# IR (KBr) spectrum of compound 15

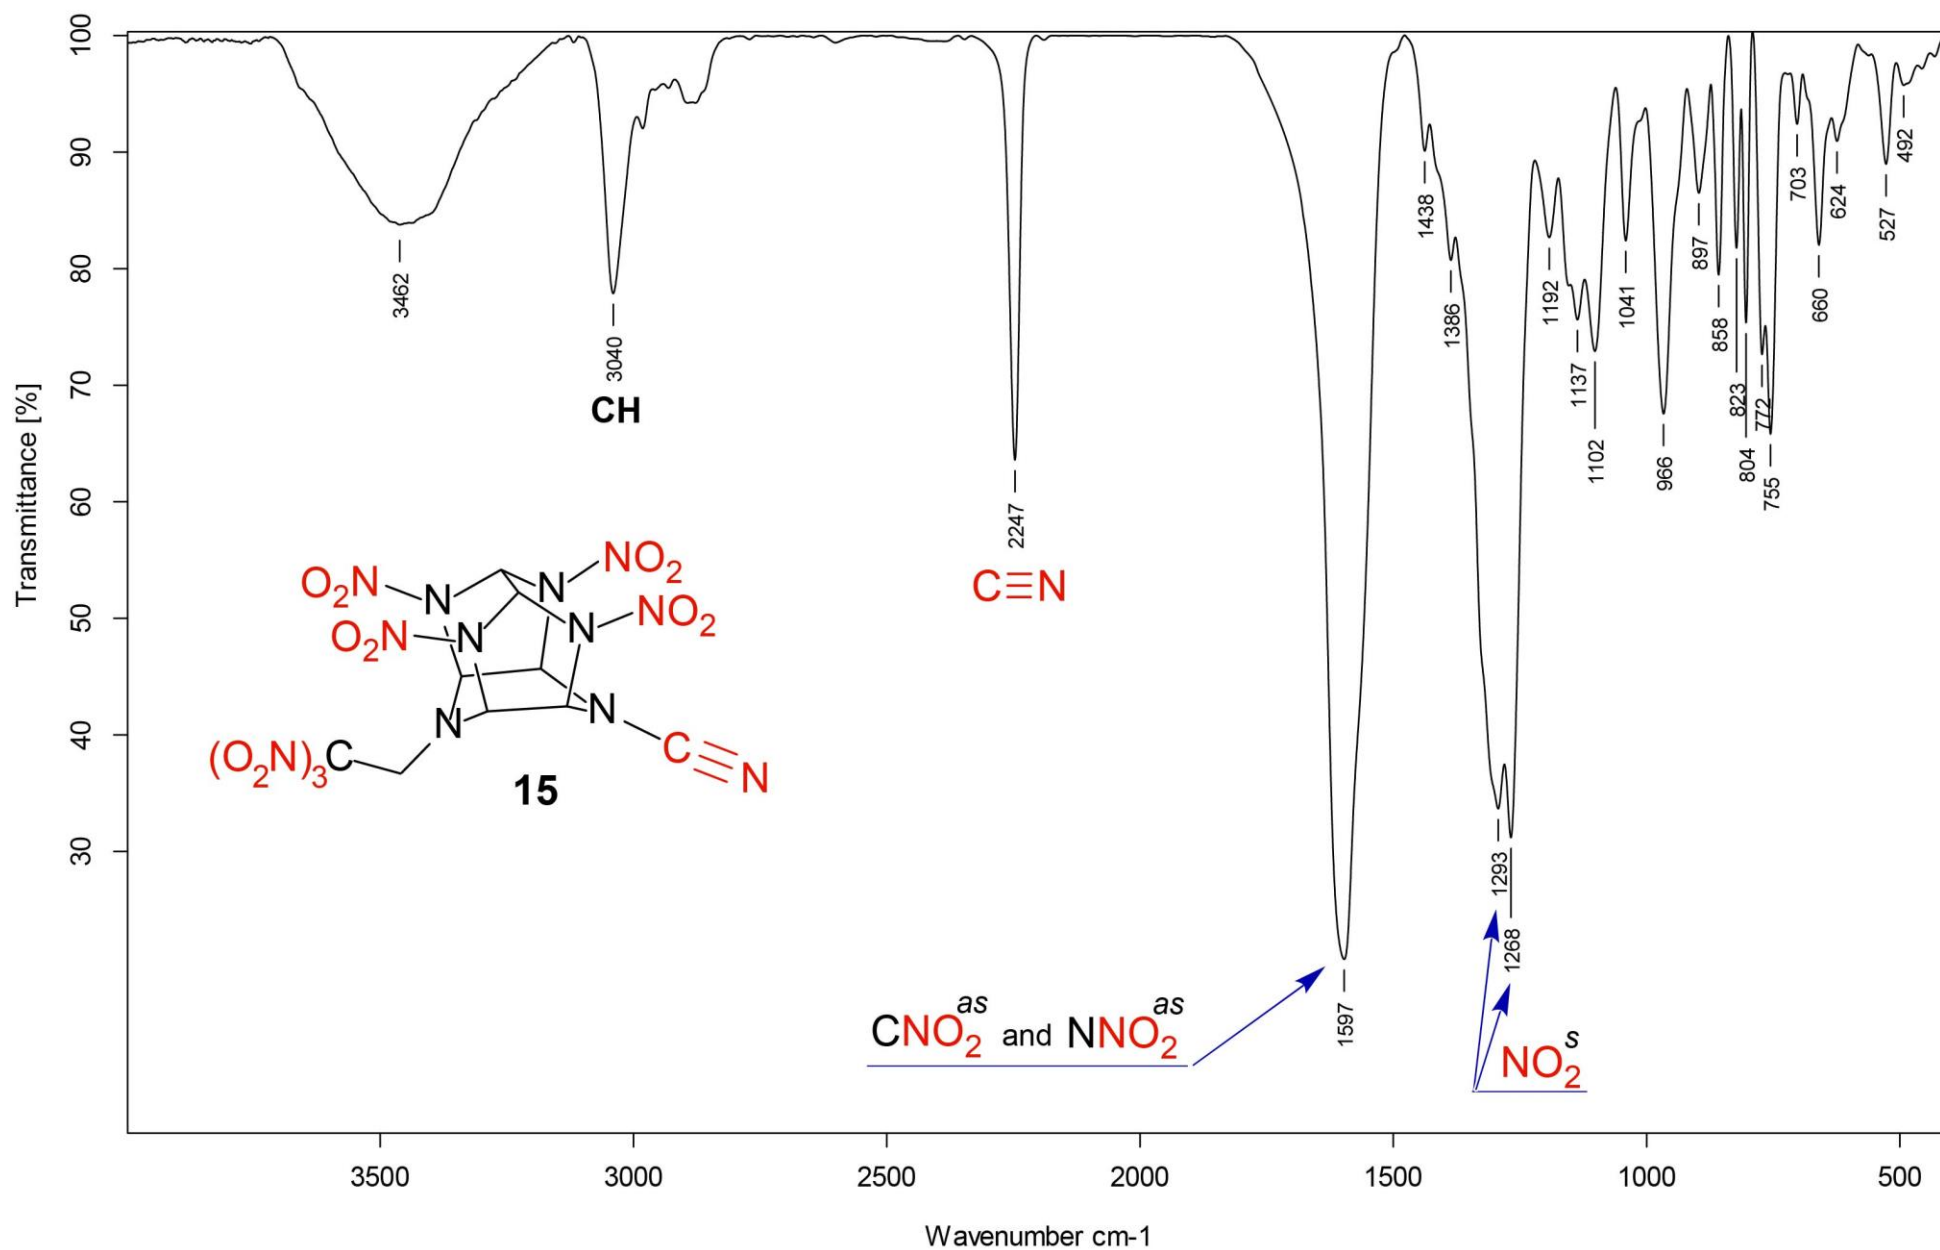

# HRMS (ESI) for compound 15

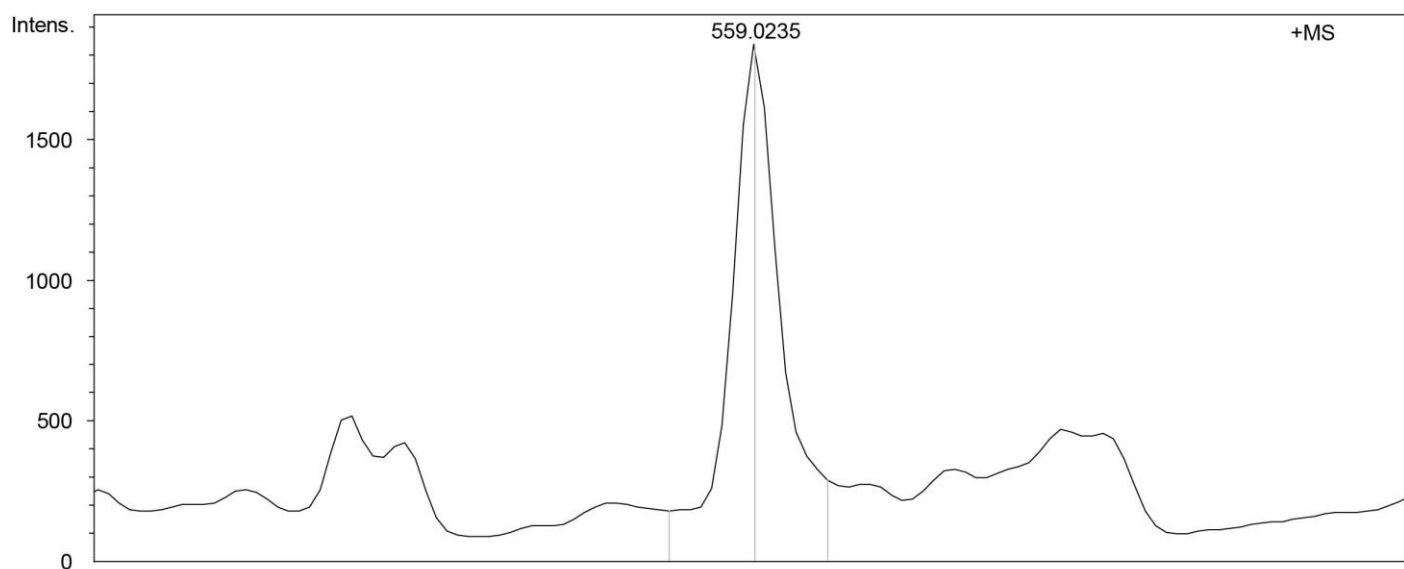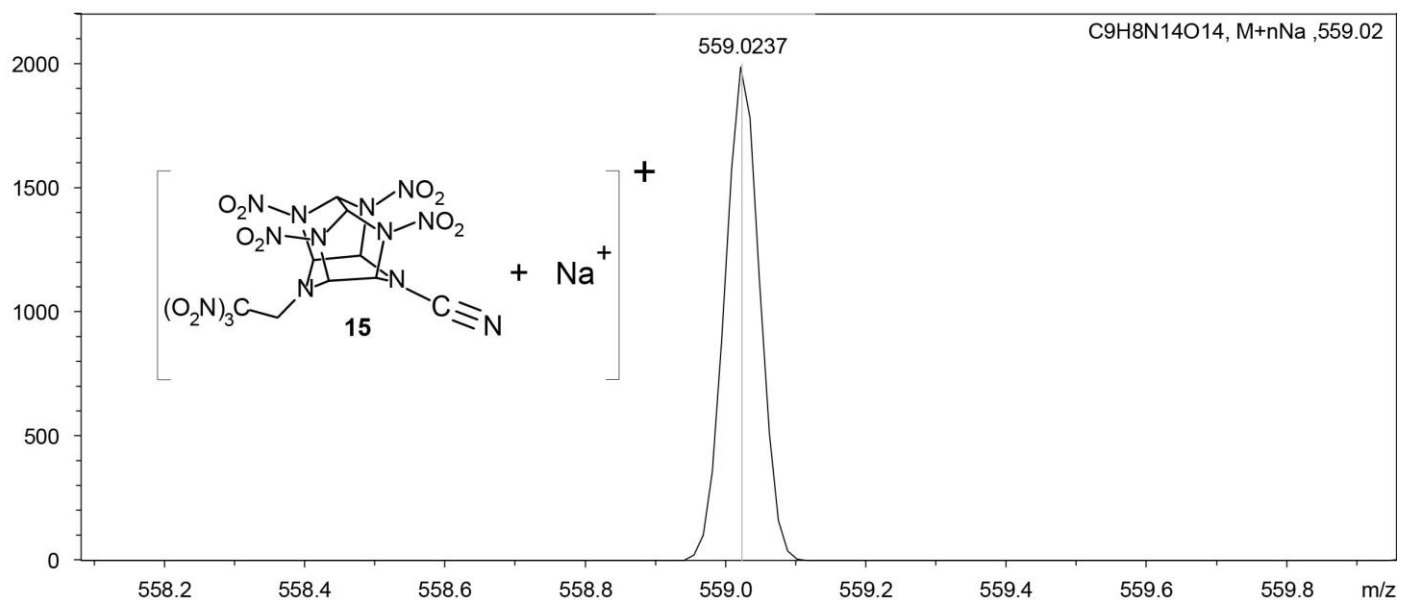

# $^1\text{H}$ NMR (300.1 MHz, $[\text{D}_6]\text{DMSO}$ ) spectrum of compound 20

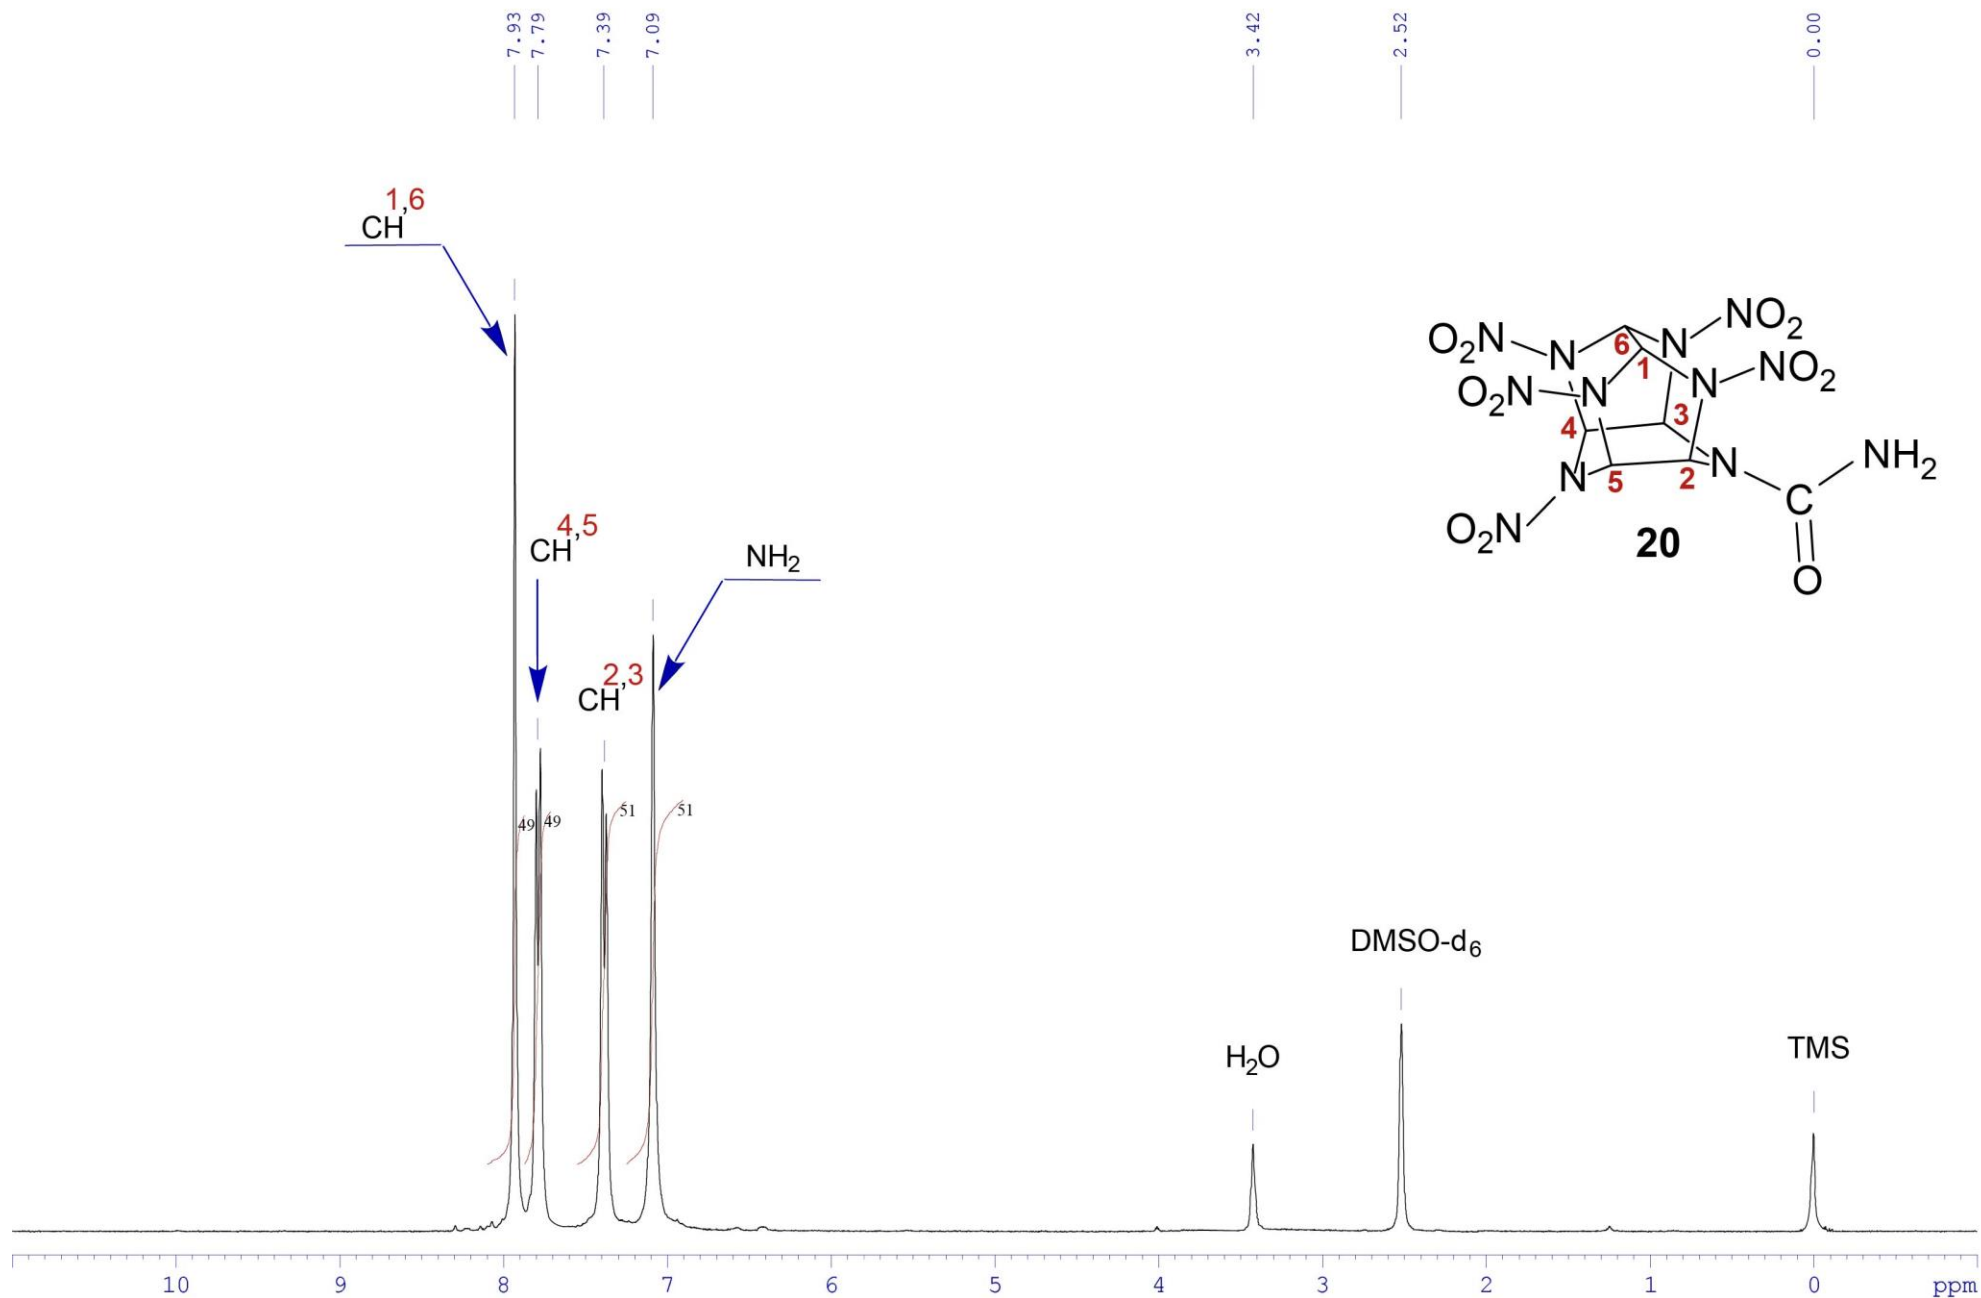

**$^{13}\text{C}$  NMR (75.5 MHz,  $[\text{D}_6]\text{DMSO}$ ) spectrum of compound 20**

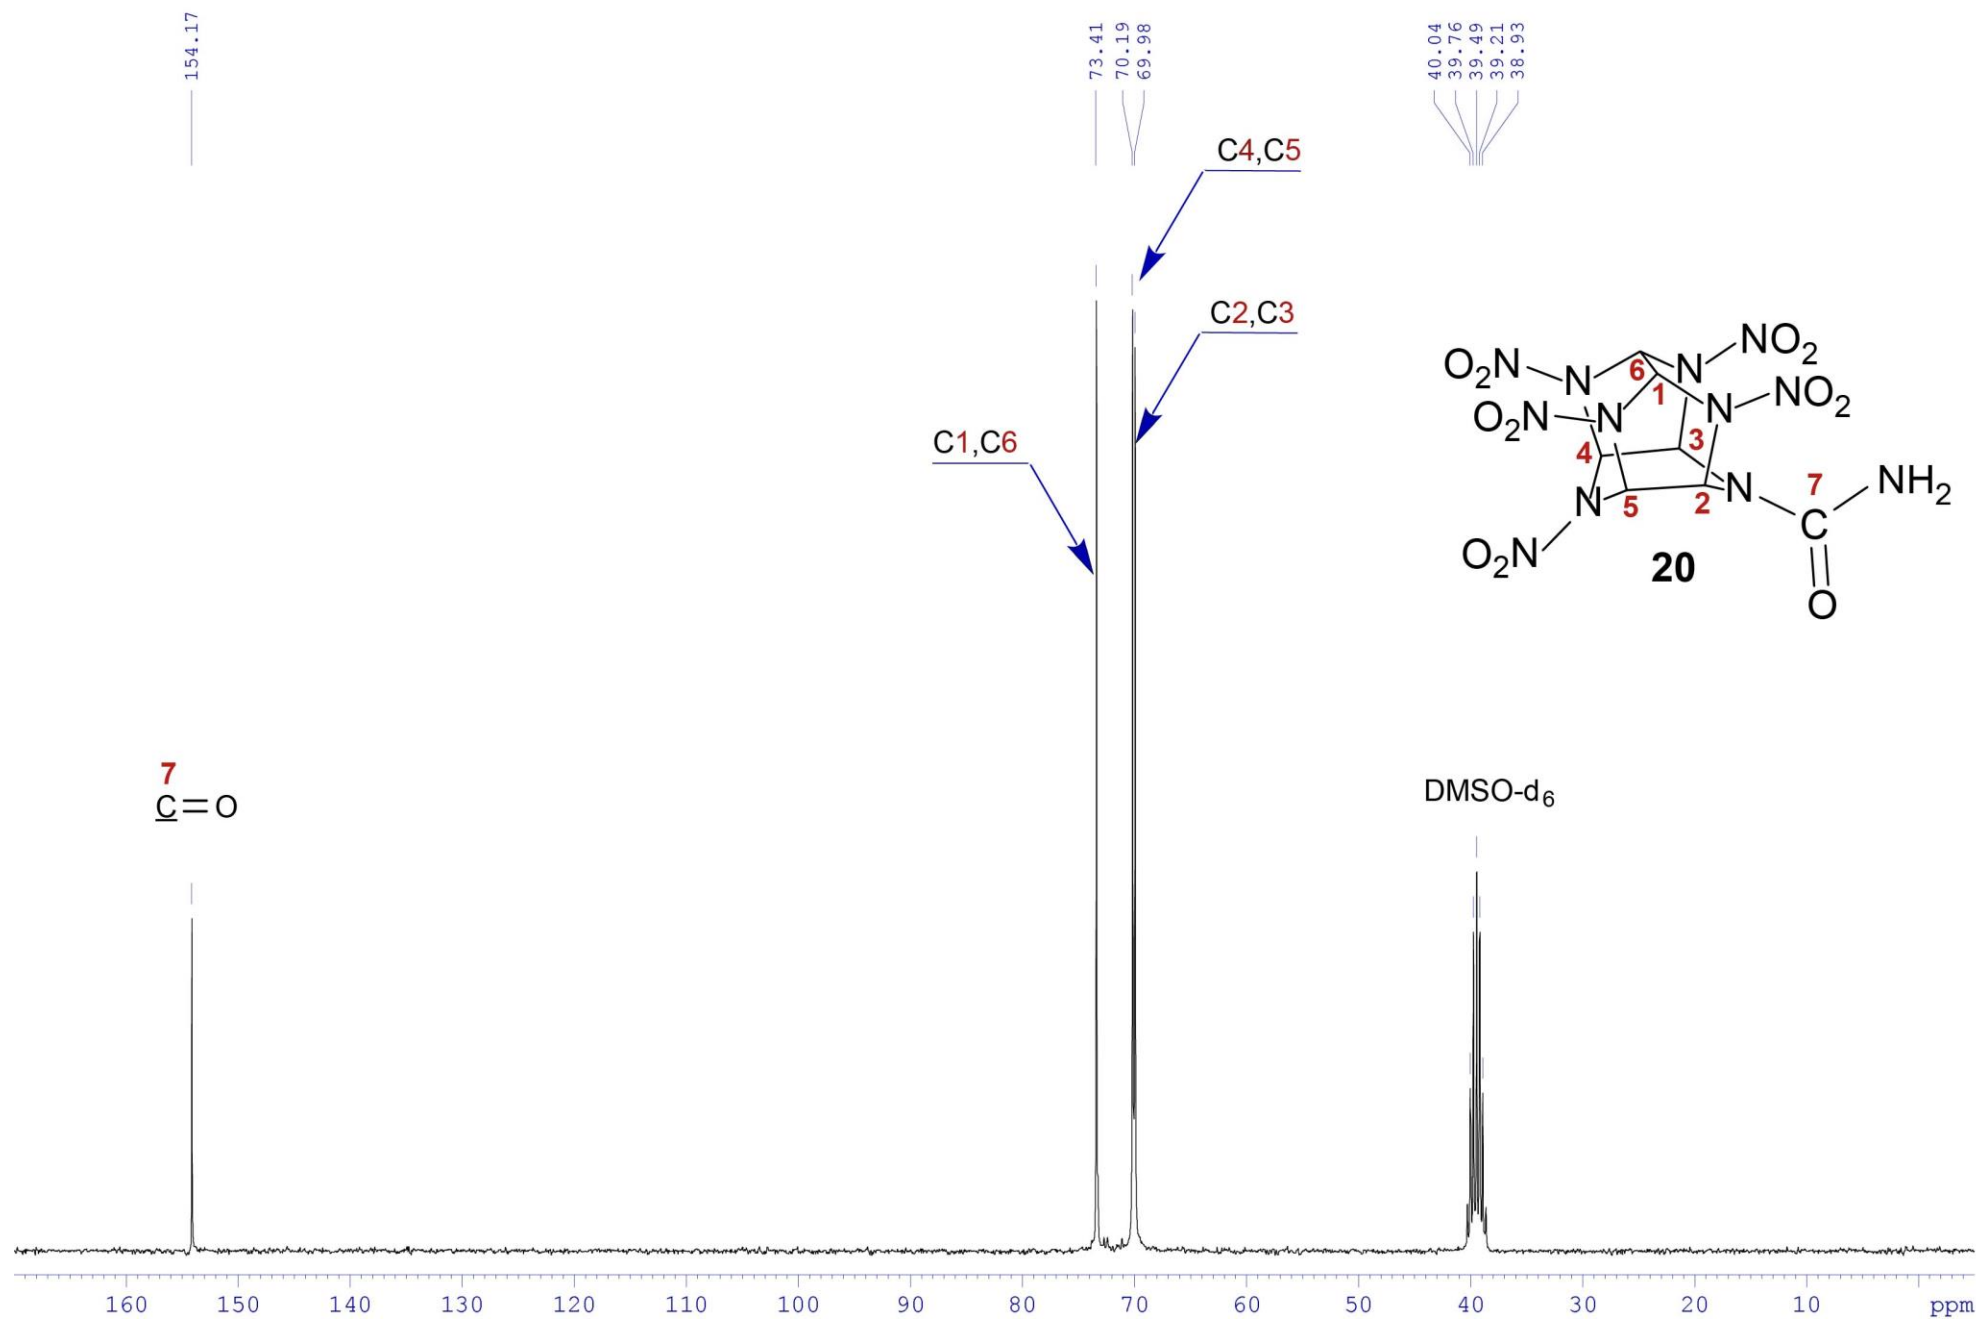

**$^{14}\text{N}$  NMR (22 MHz,  $[\text{D}_6]\text{DMSO}$ ) spectrum of compound 20**

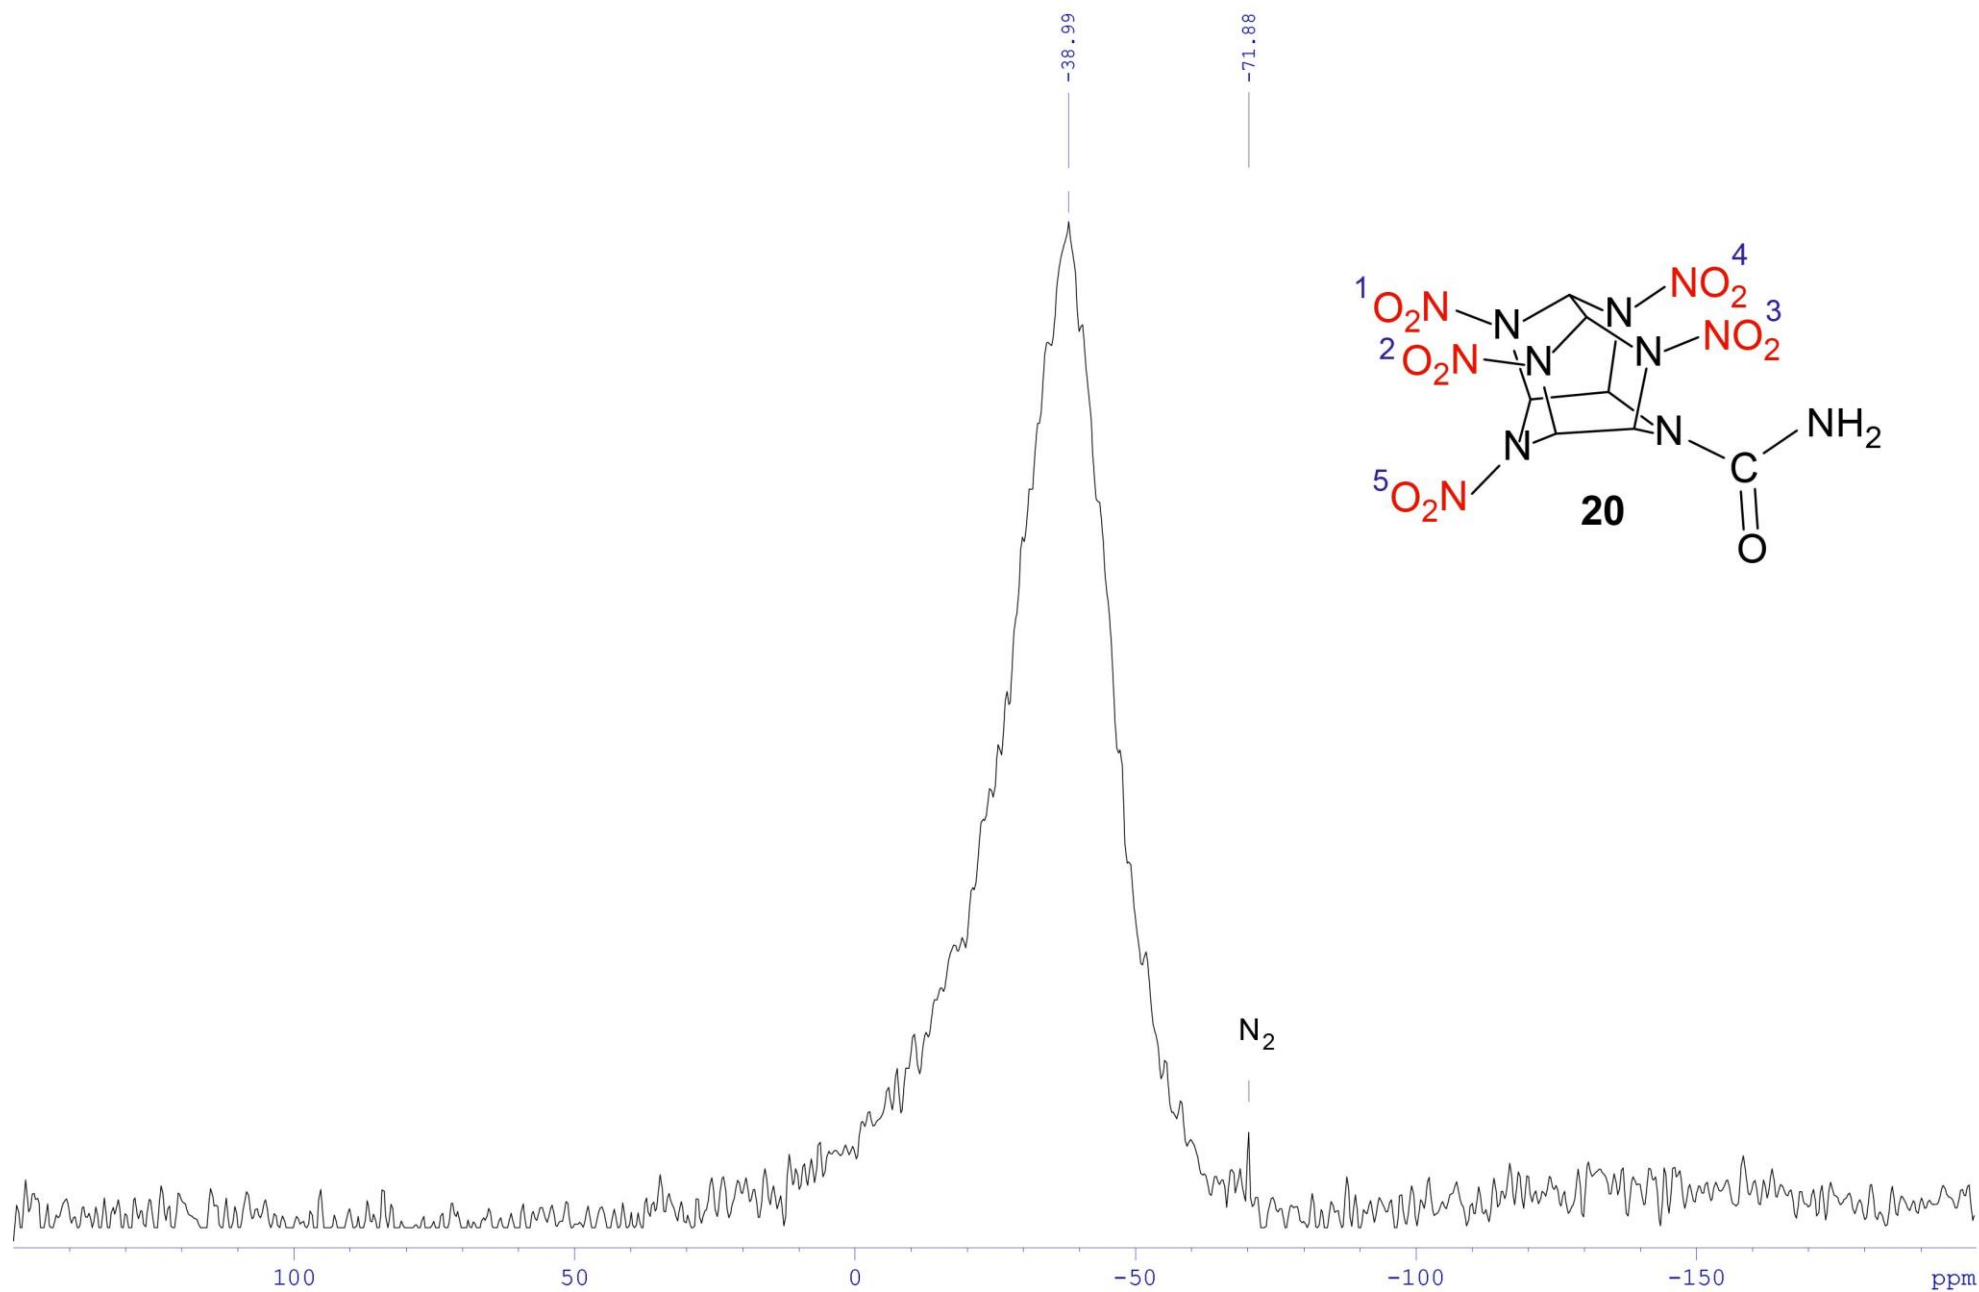

# IR (KBr) spectrum of compound 20

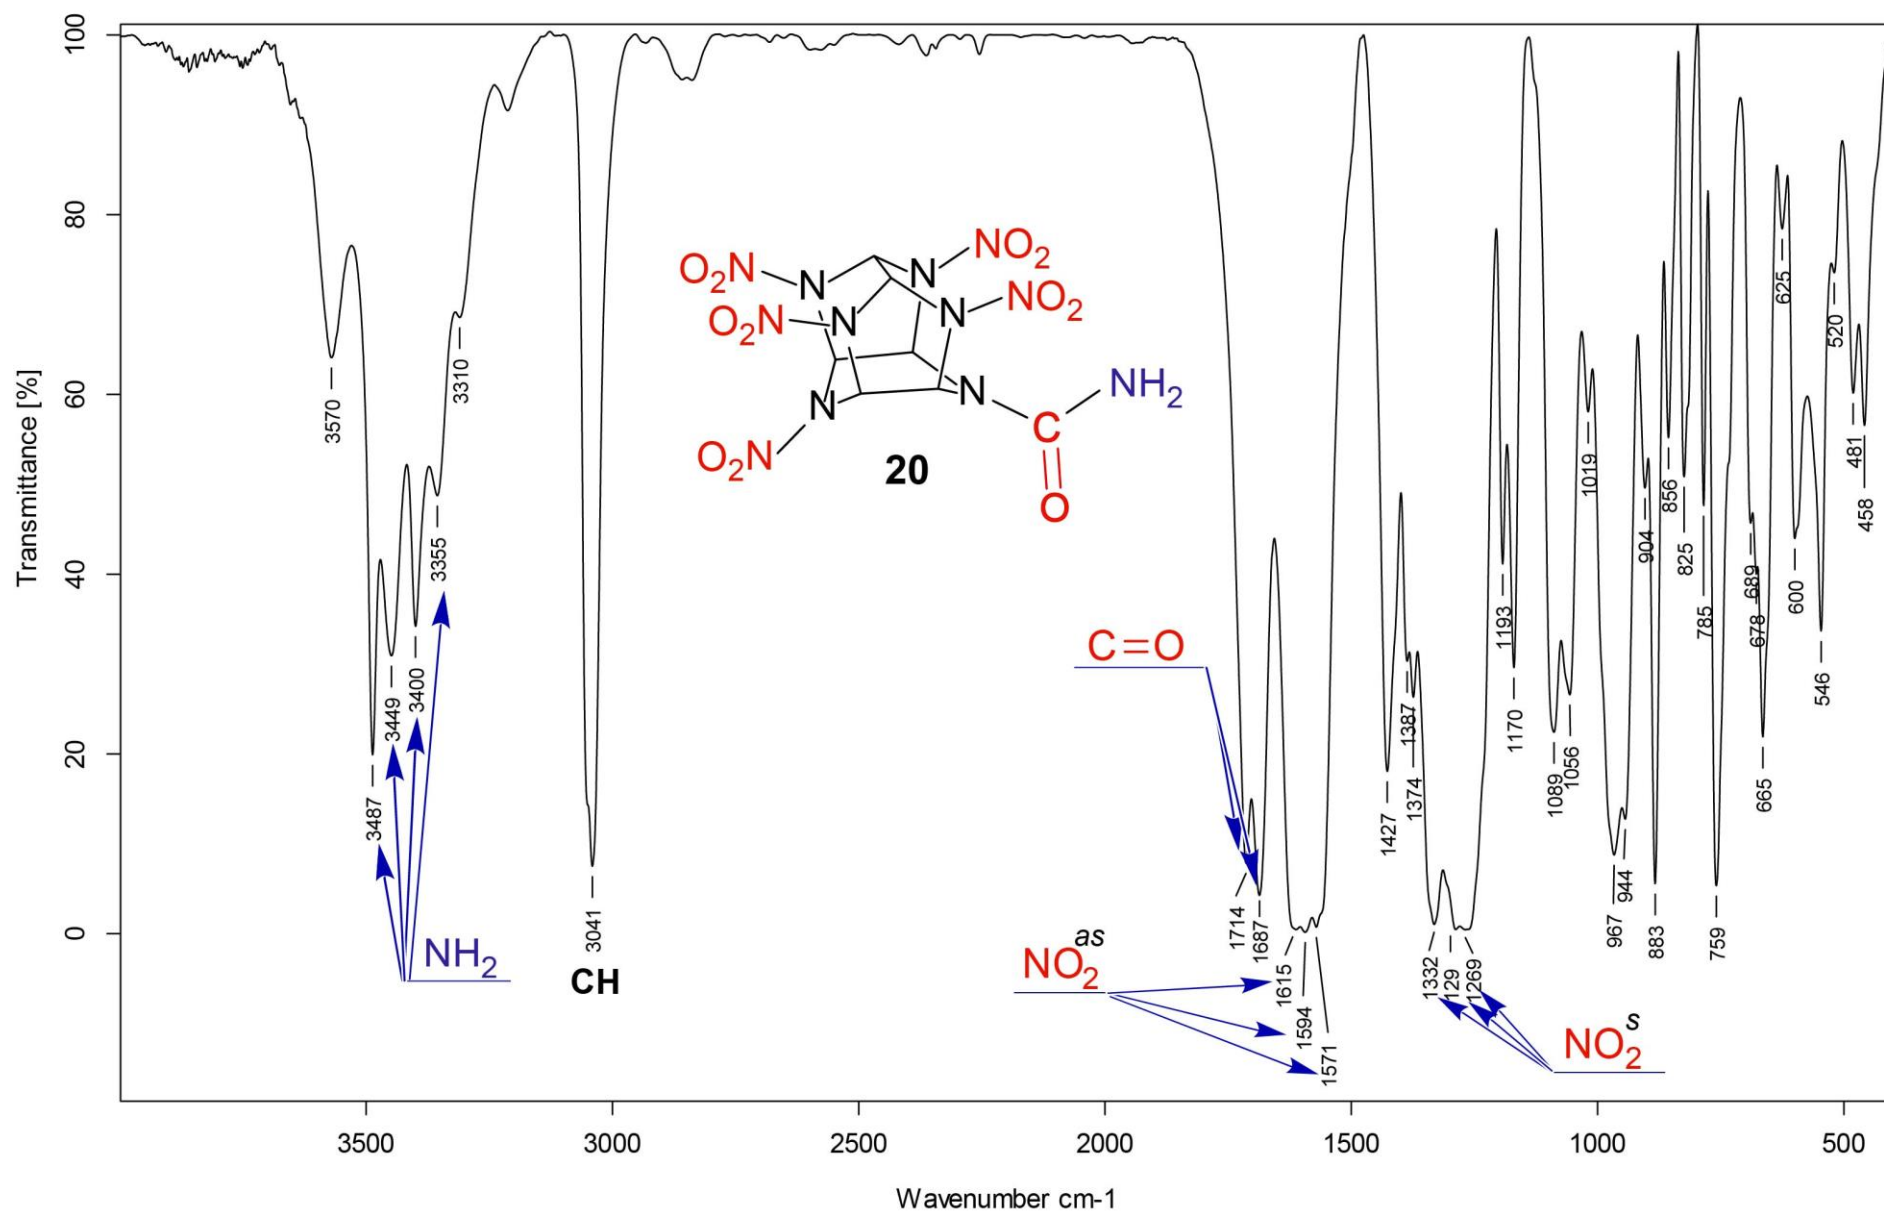

**$^1\text{H}$  NMR (600.13 MHz,  $[\text{D}_6]\text{acetone}$ ) spectrum of compound 22**

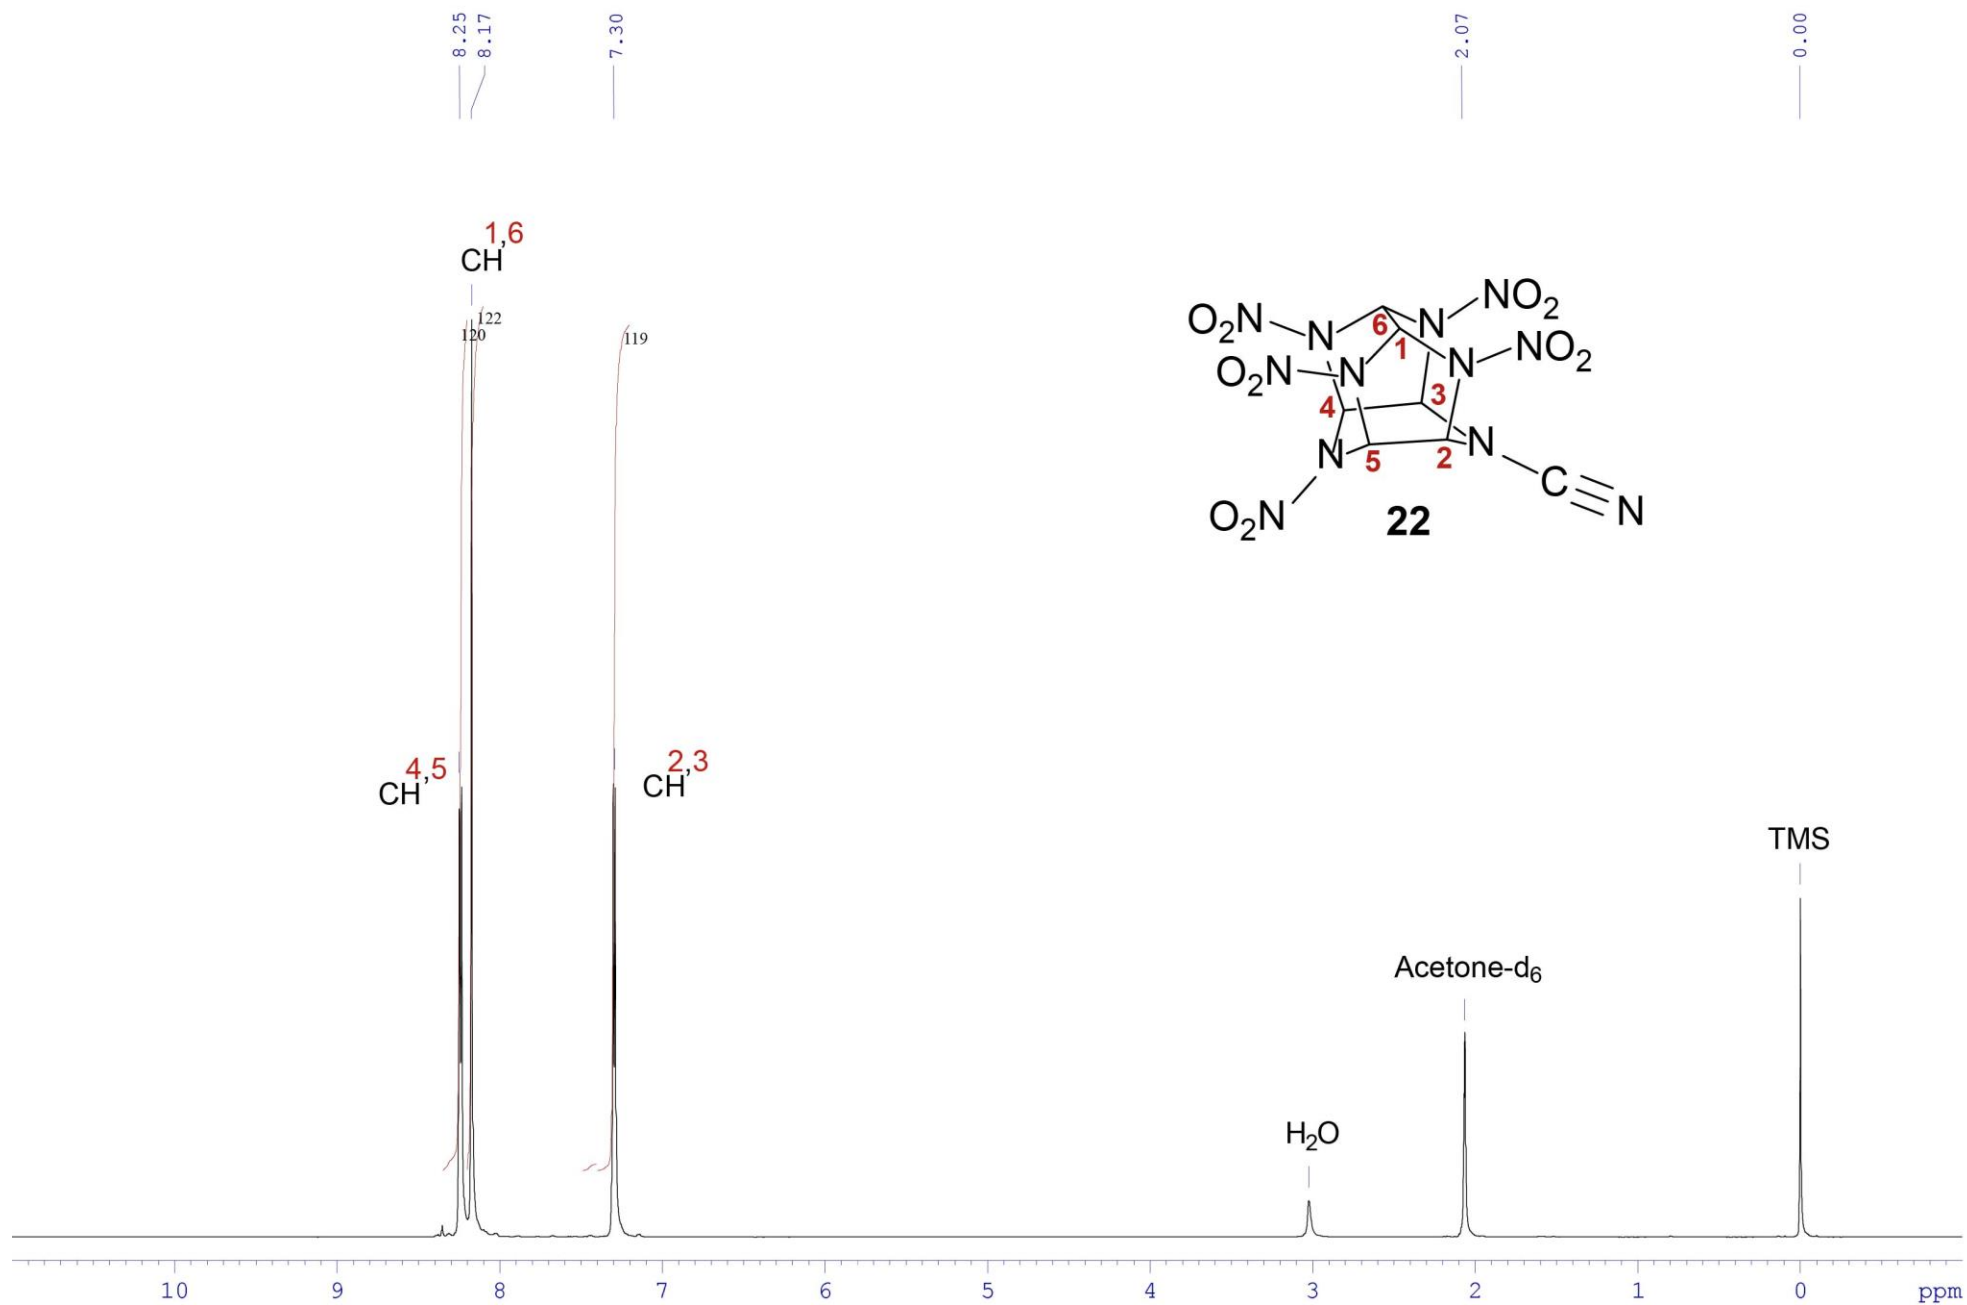

**$^1\text{H}$  NMR (300.1 MHz,  $[\text{D}_6]\text{DMSO}$ ) spectrum of compound 22**

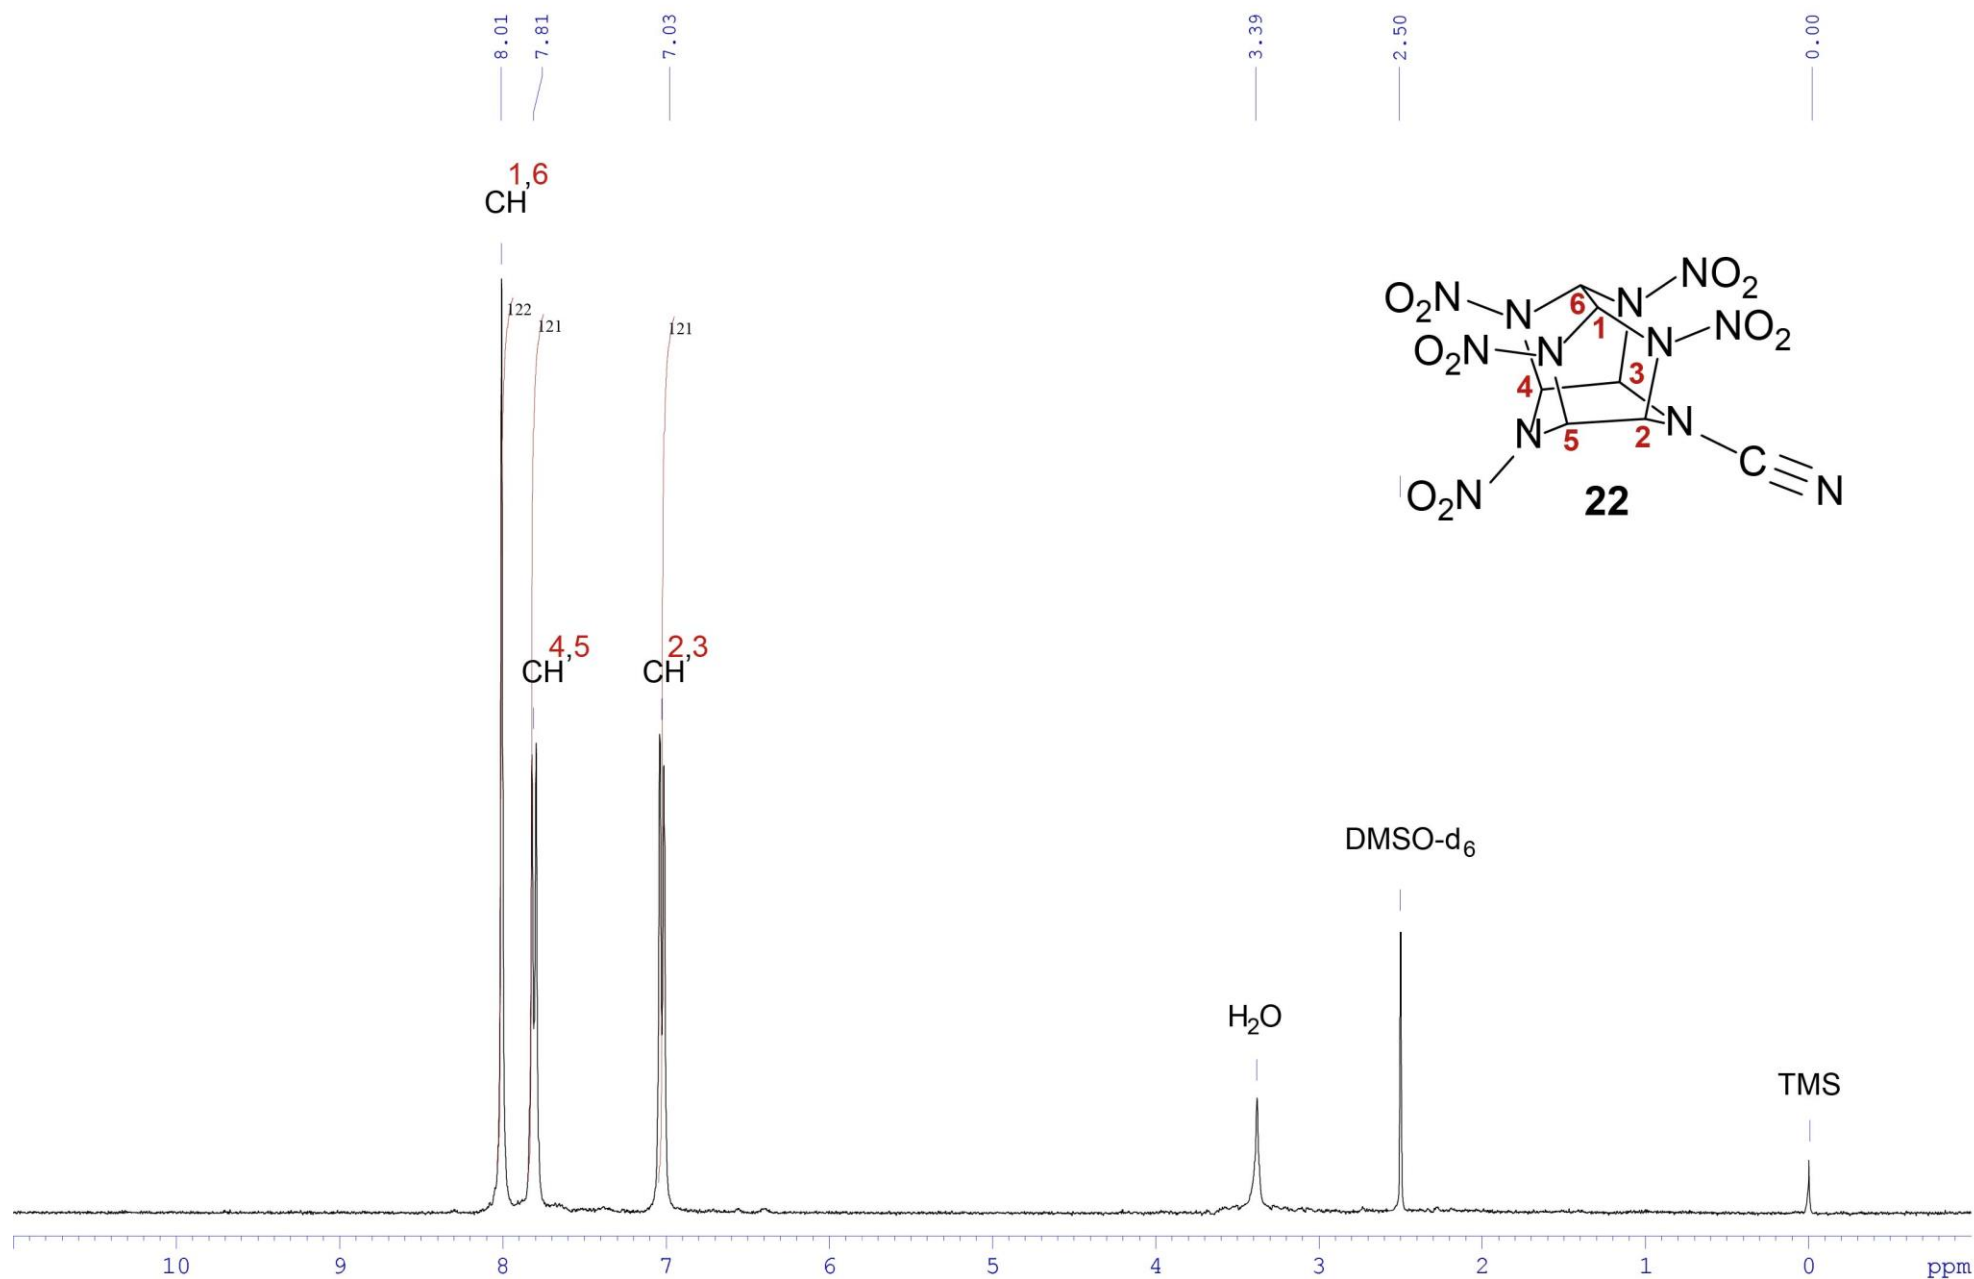

**$^{13}\text{C}$  NMR (150.9 MHz,  $[\text{D}_6]$ acetone) spectrum of compound 22**

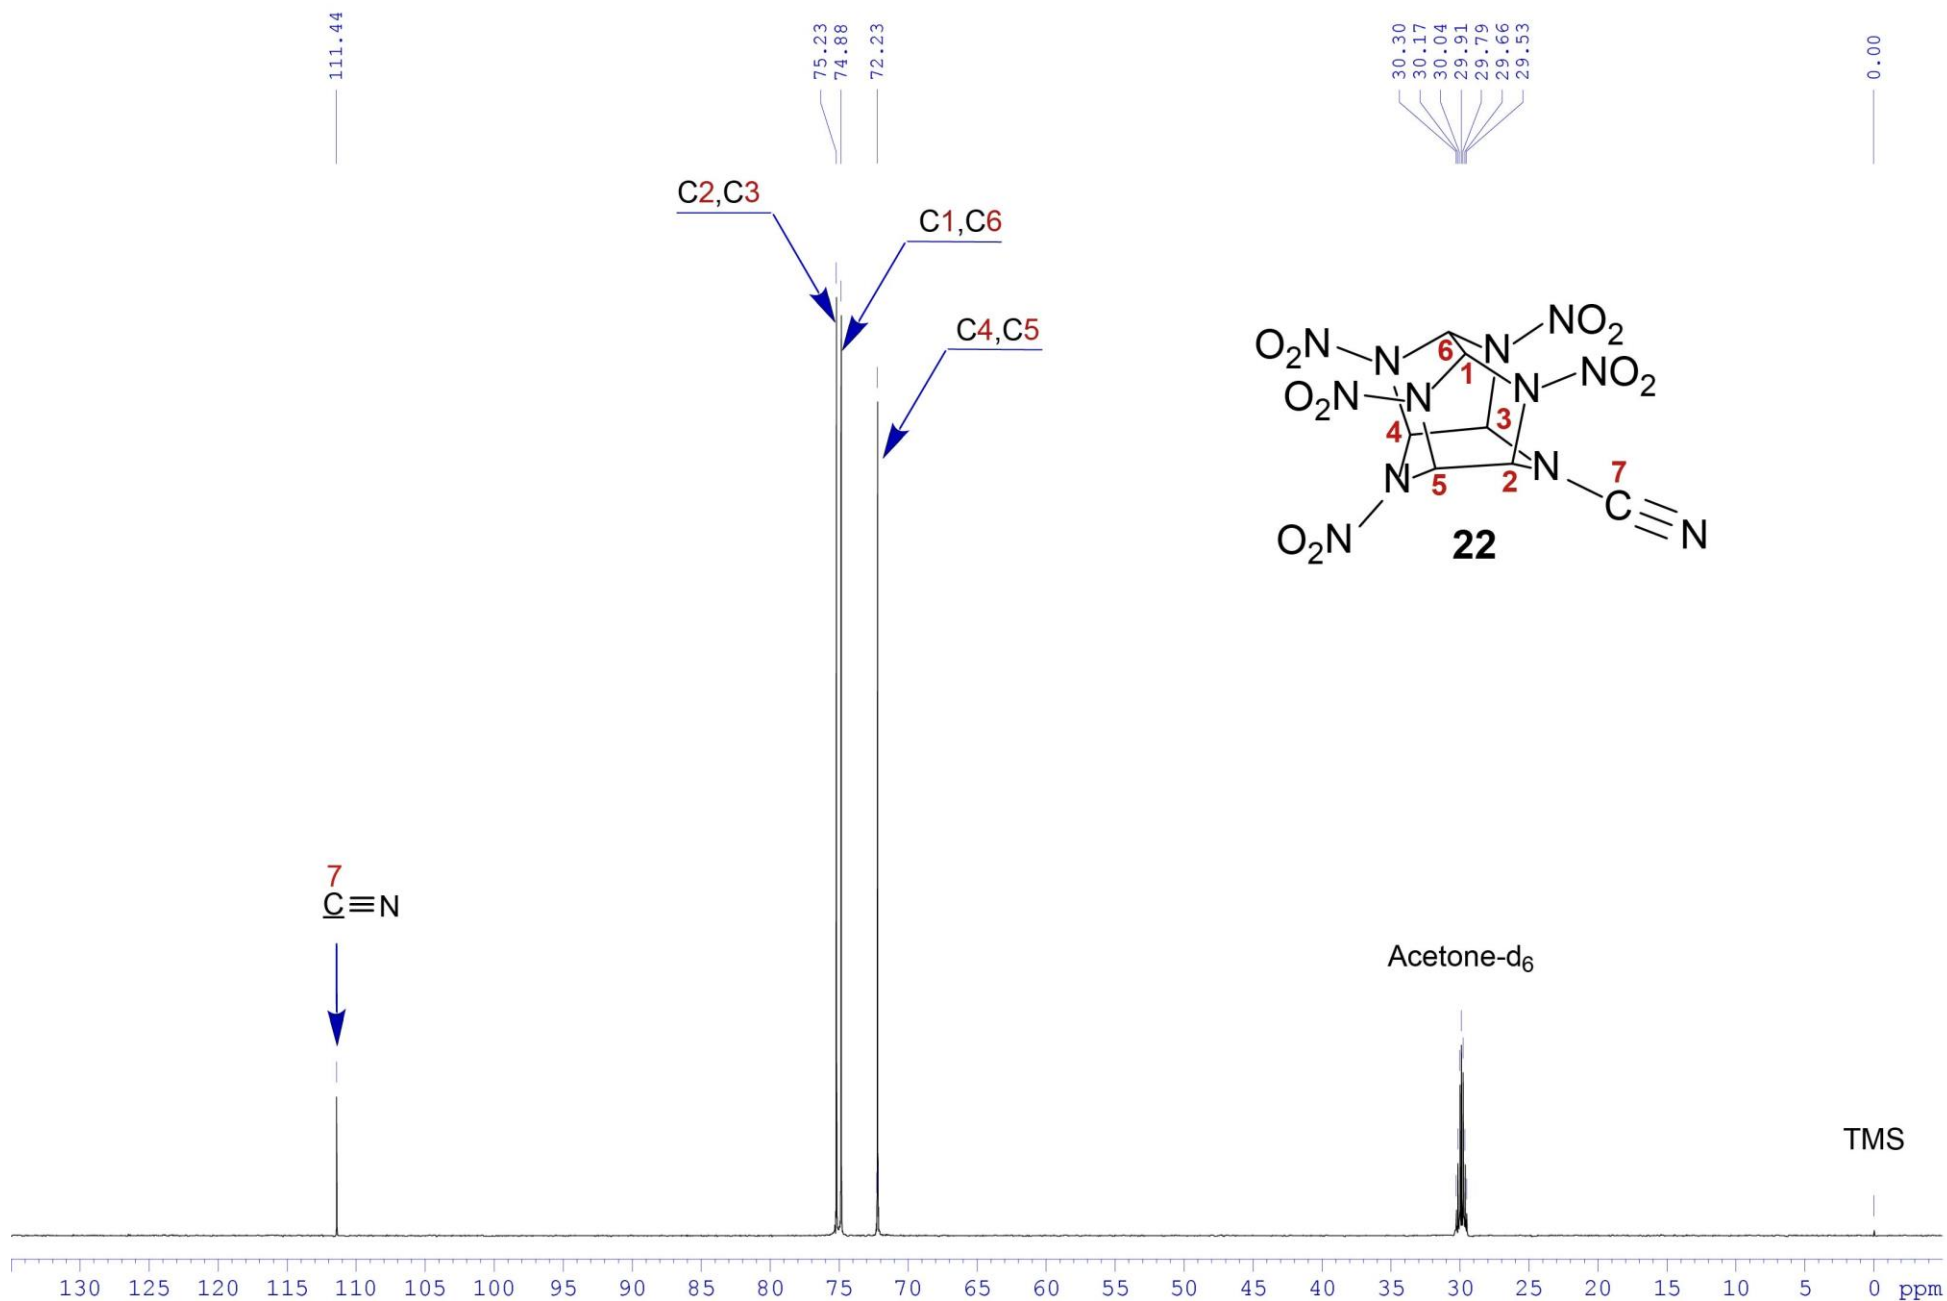

**$\{^1\text{H}-^{13}\text{C}\}$  HSQC NMR (600.13 MHz,  $[\text{D}_6]\text{acetone}$ ) spectrum of compound 22**

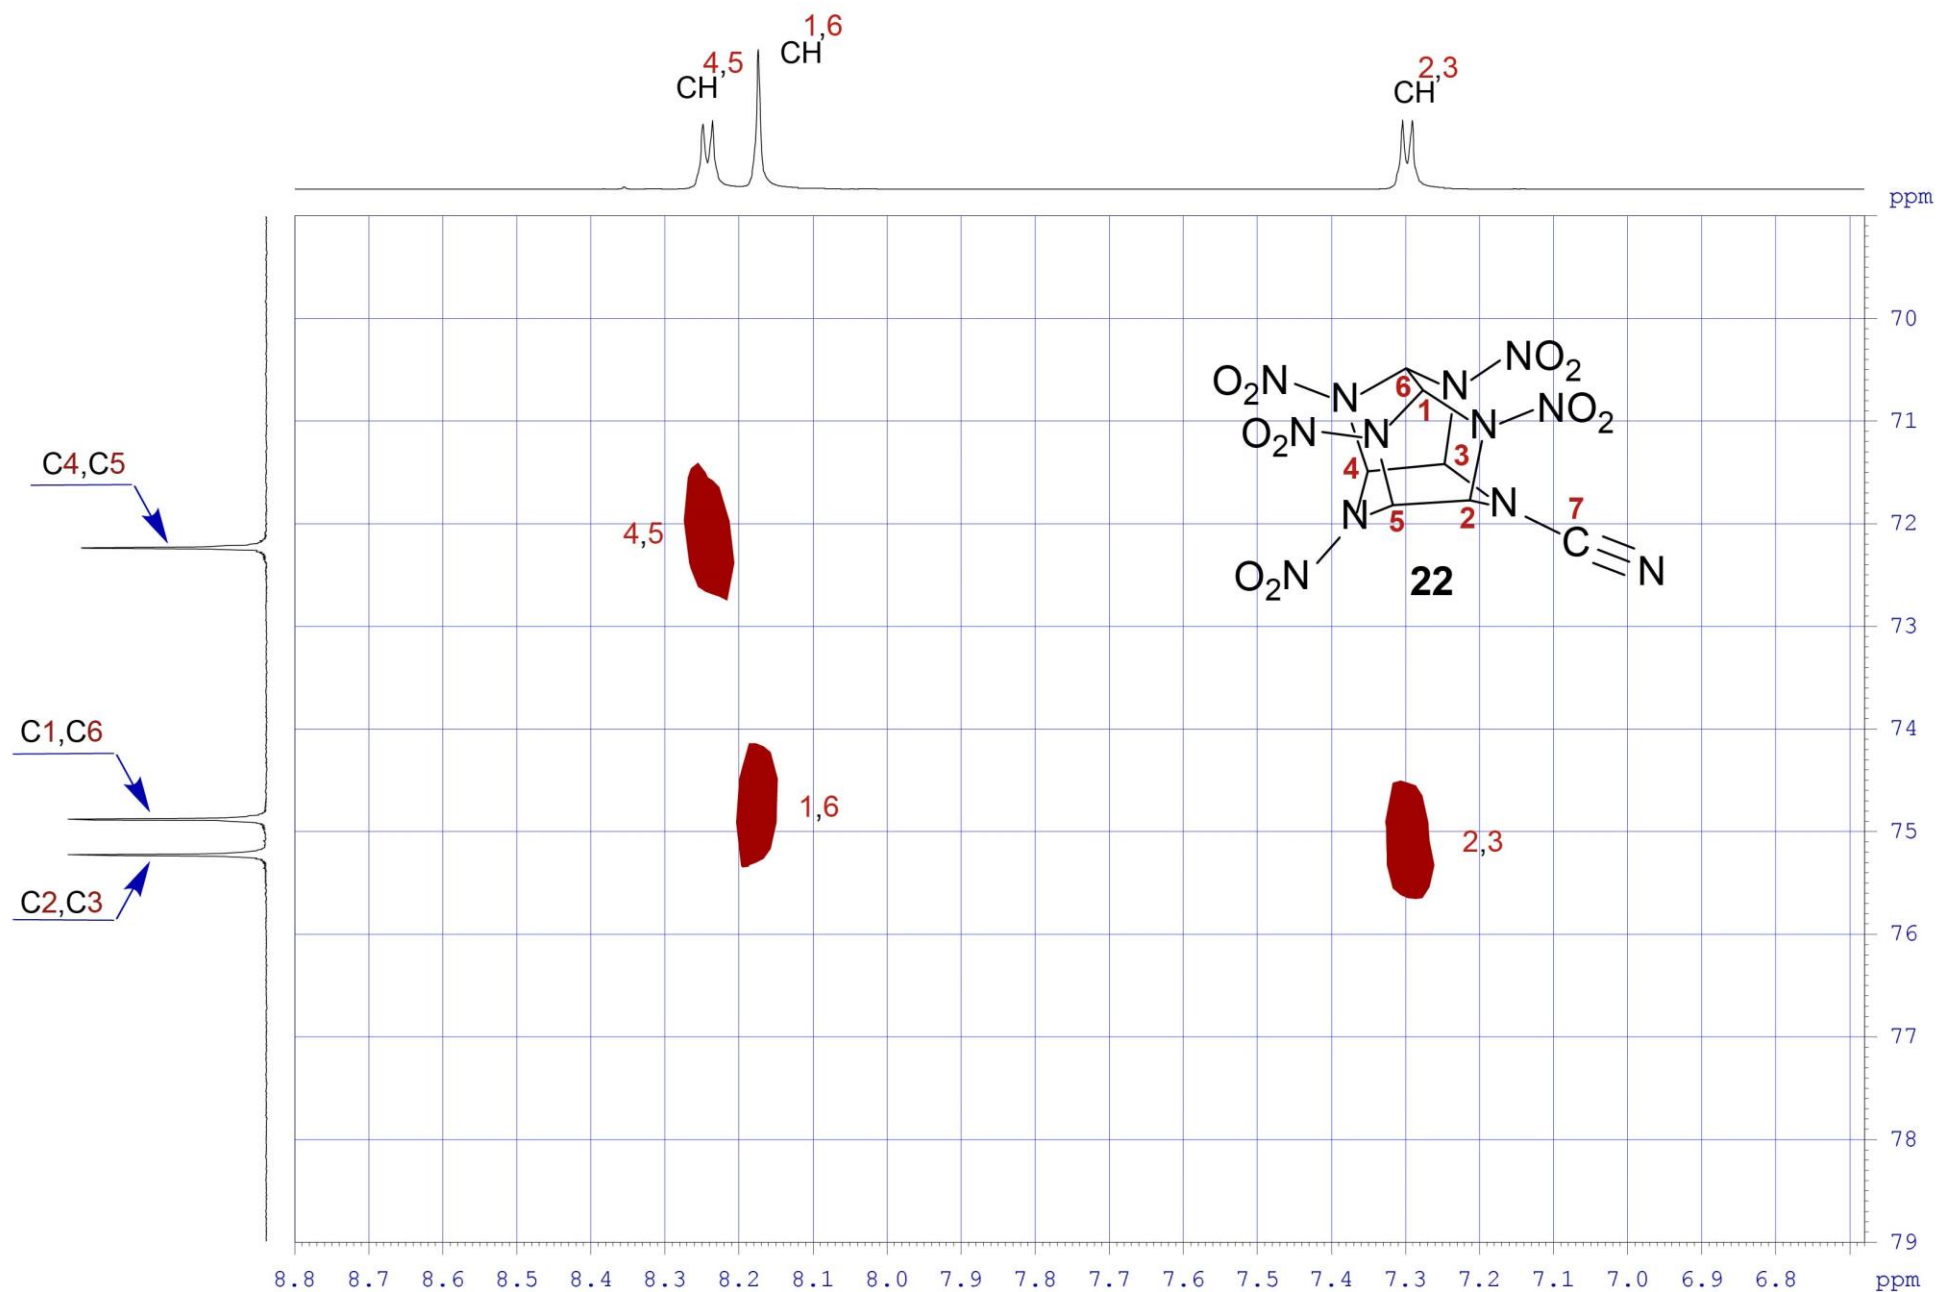

**$\{^1\text{H}-^{13}\text{C}\}$  HMBC NMR (600.13 MHz,  $[\text{D}_6]\text{acetone}$ ) spectrum of compound 22**

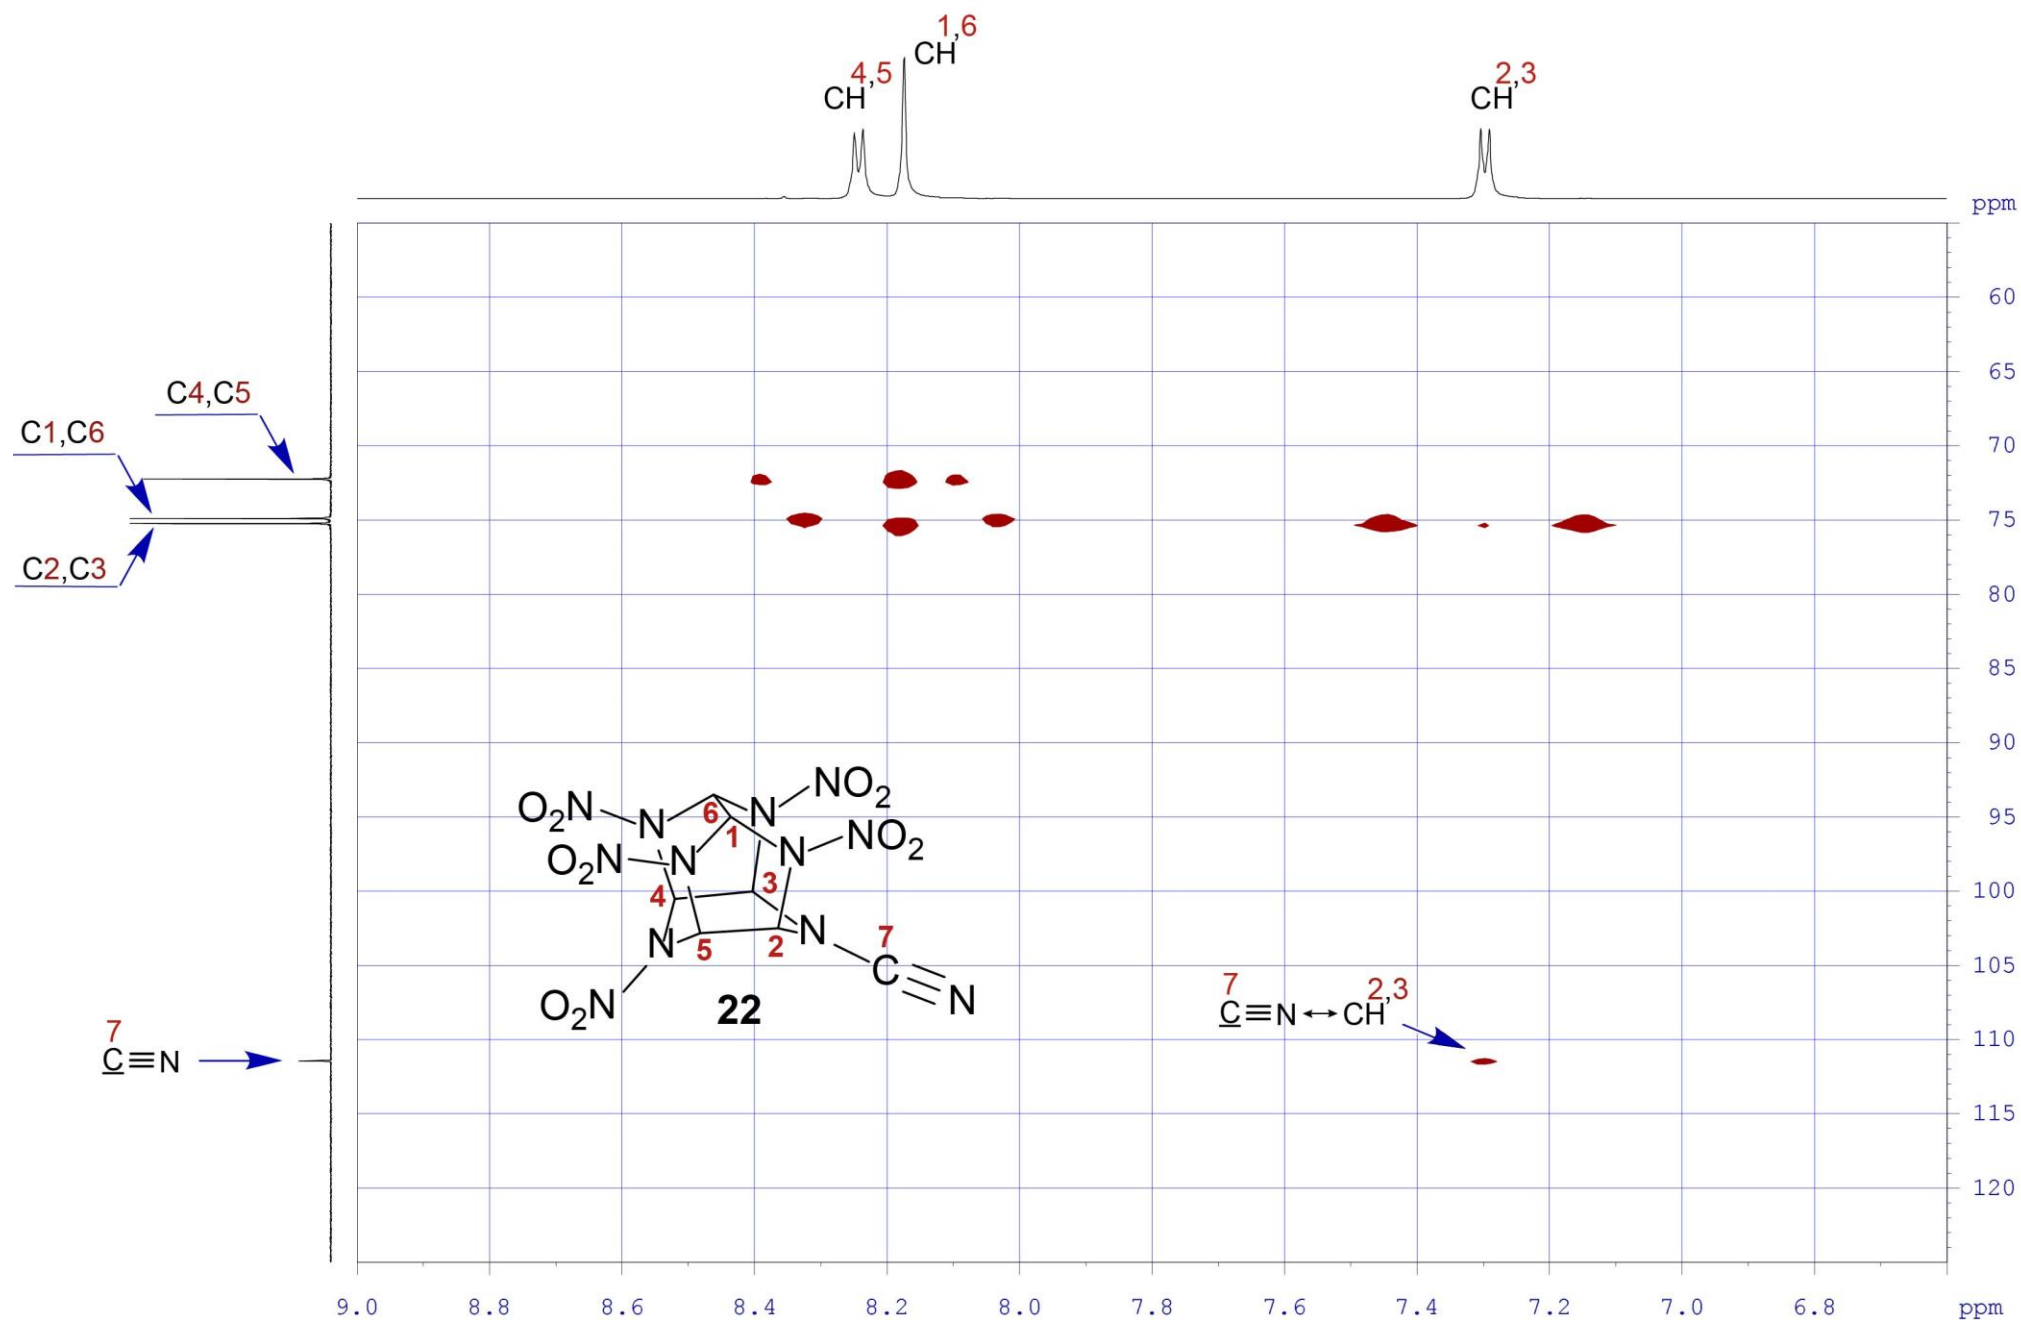

**$^{14}\text{N}$  NMR (43.37 MHz,  $[\text{D}_6]$ acetone) spectrum of compound 22**

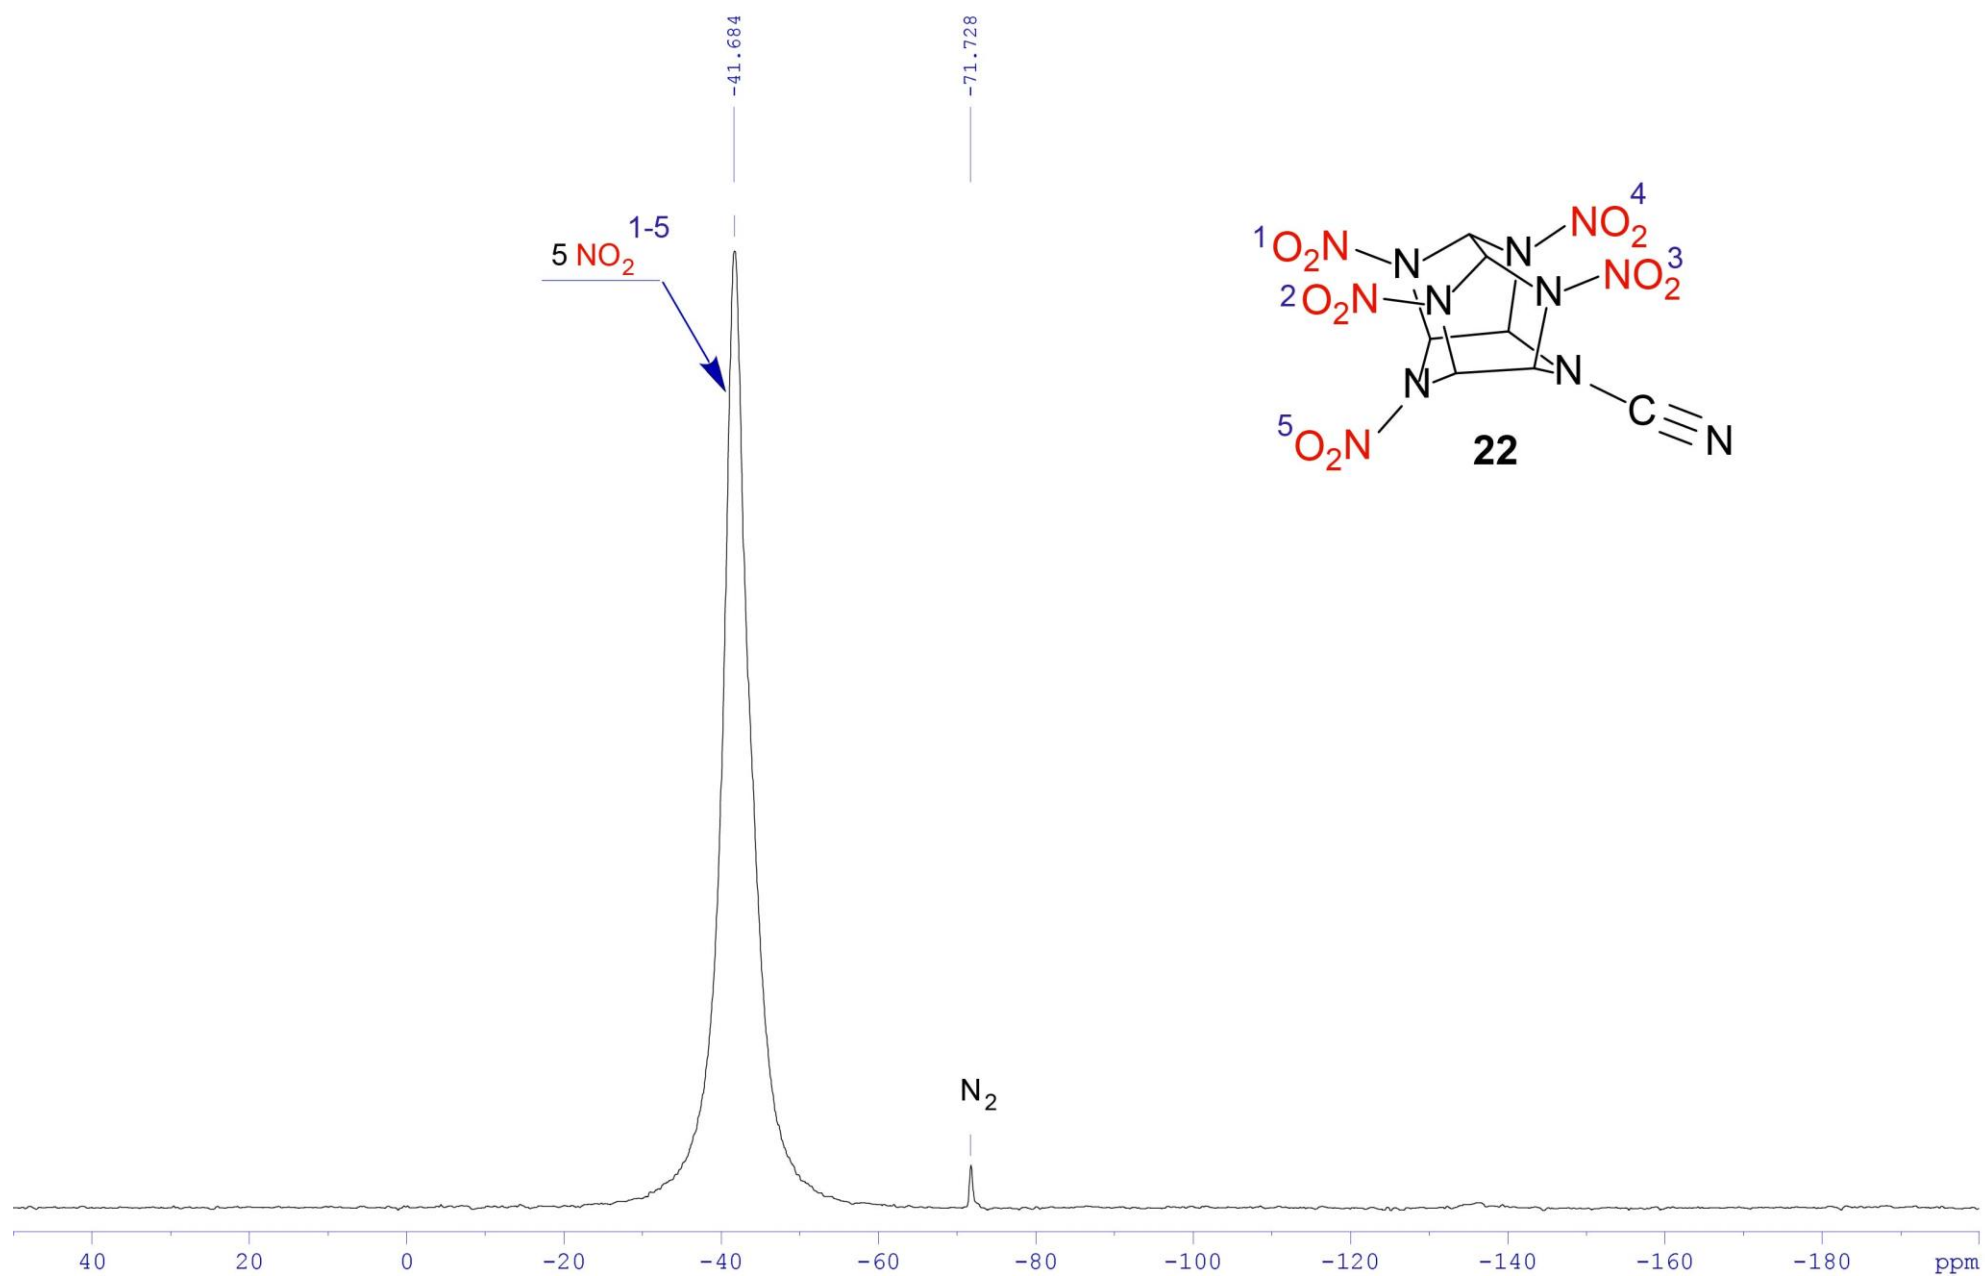

**$^{15}\text{N}$  NMR ([INVGATED], [INEPT], 60.8 MHz,  $[\text{D}_6]$ acetone) spectrum of compound 22**

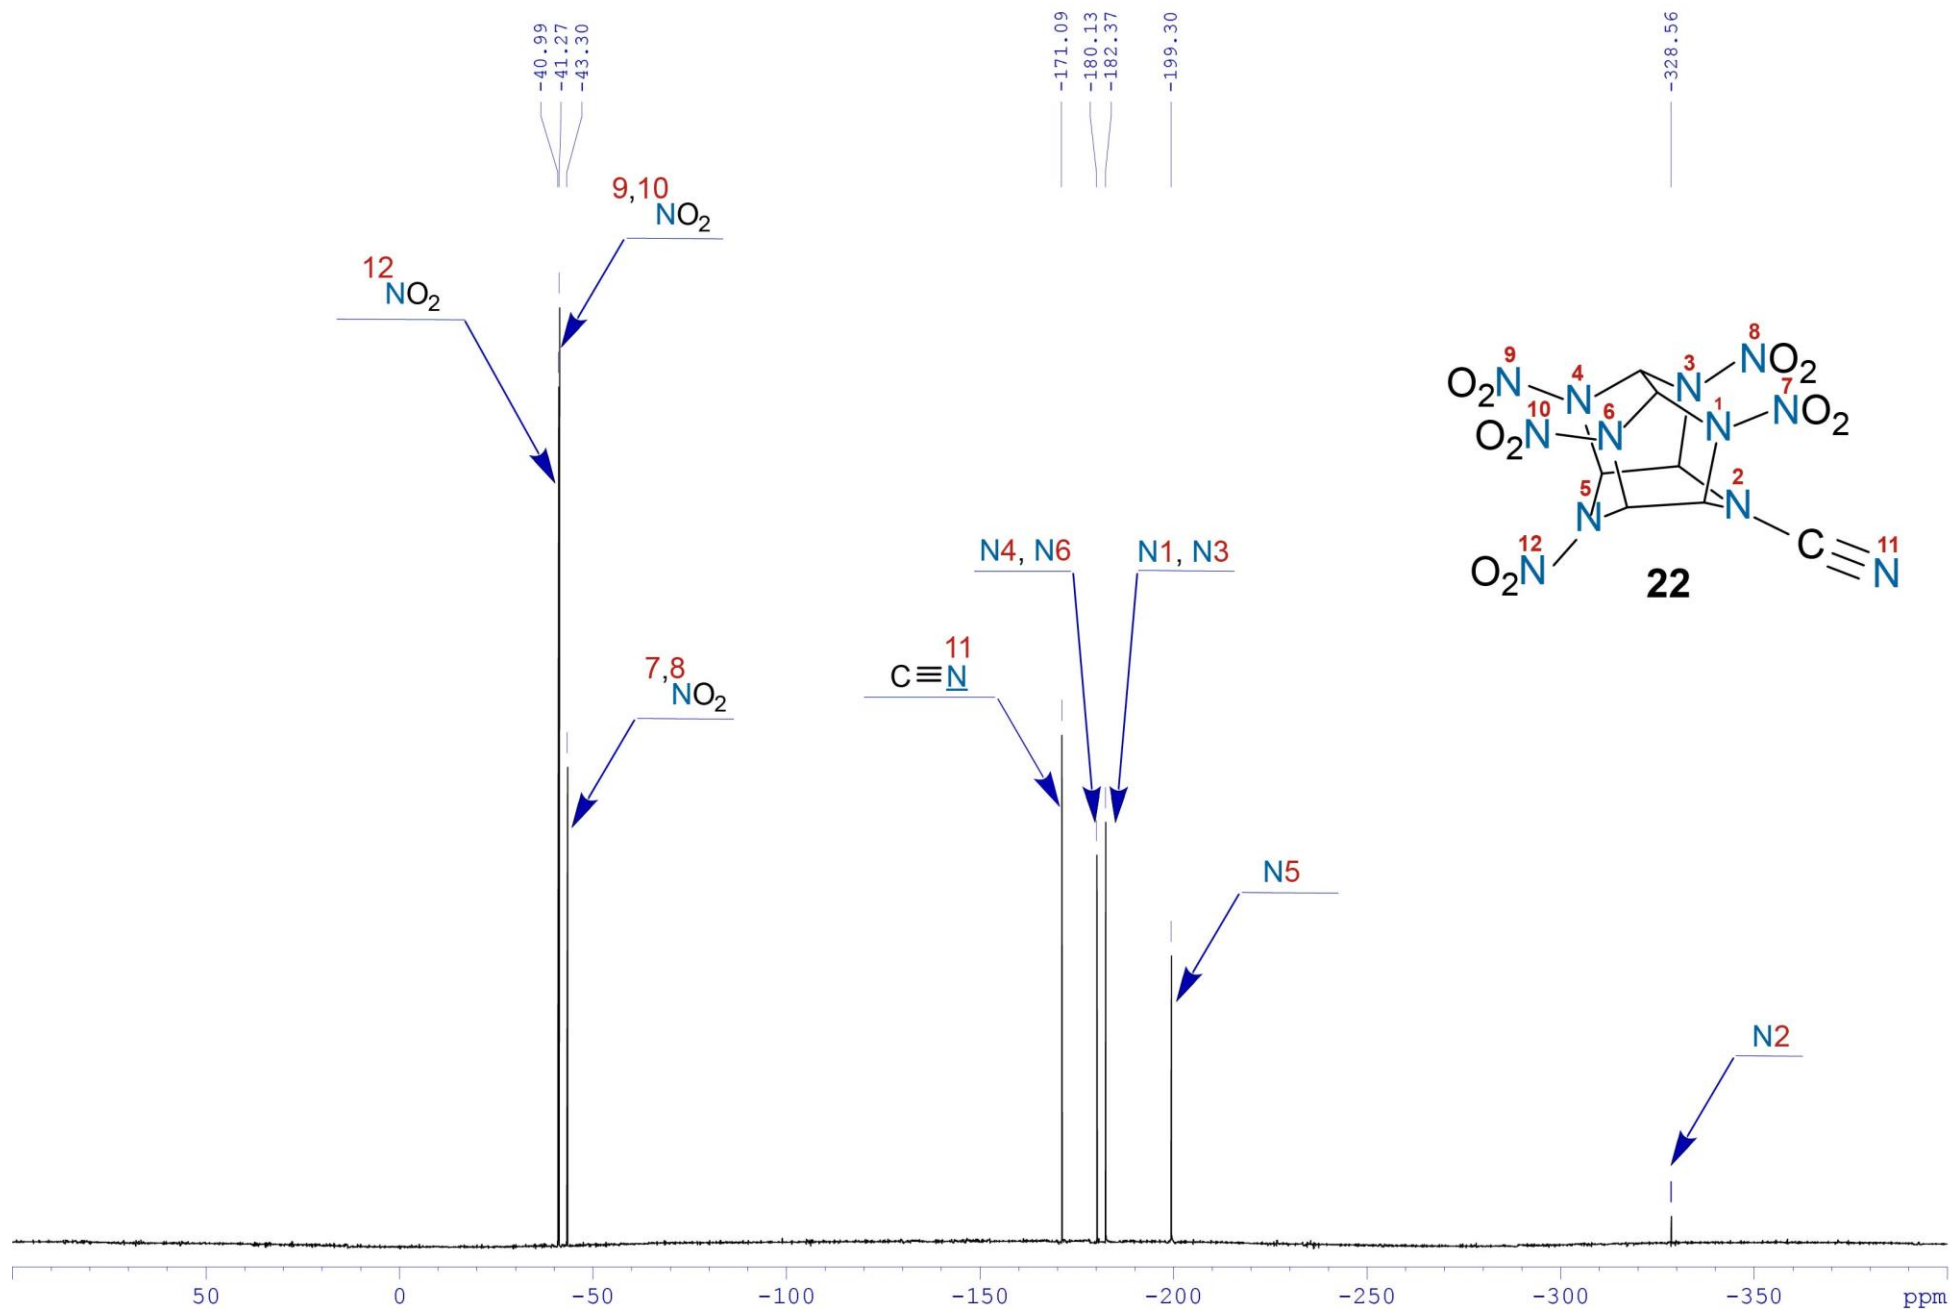

# IR (KBr) spectrum of compound 22

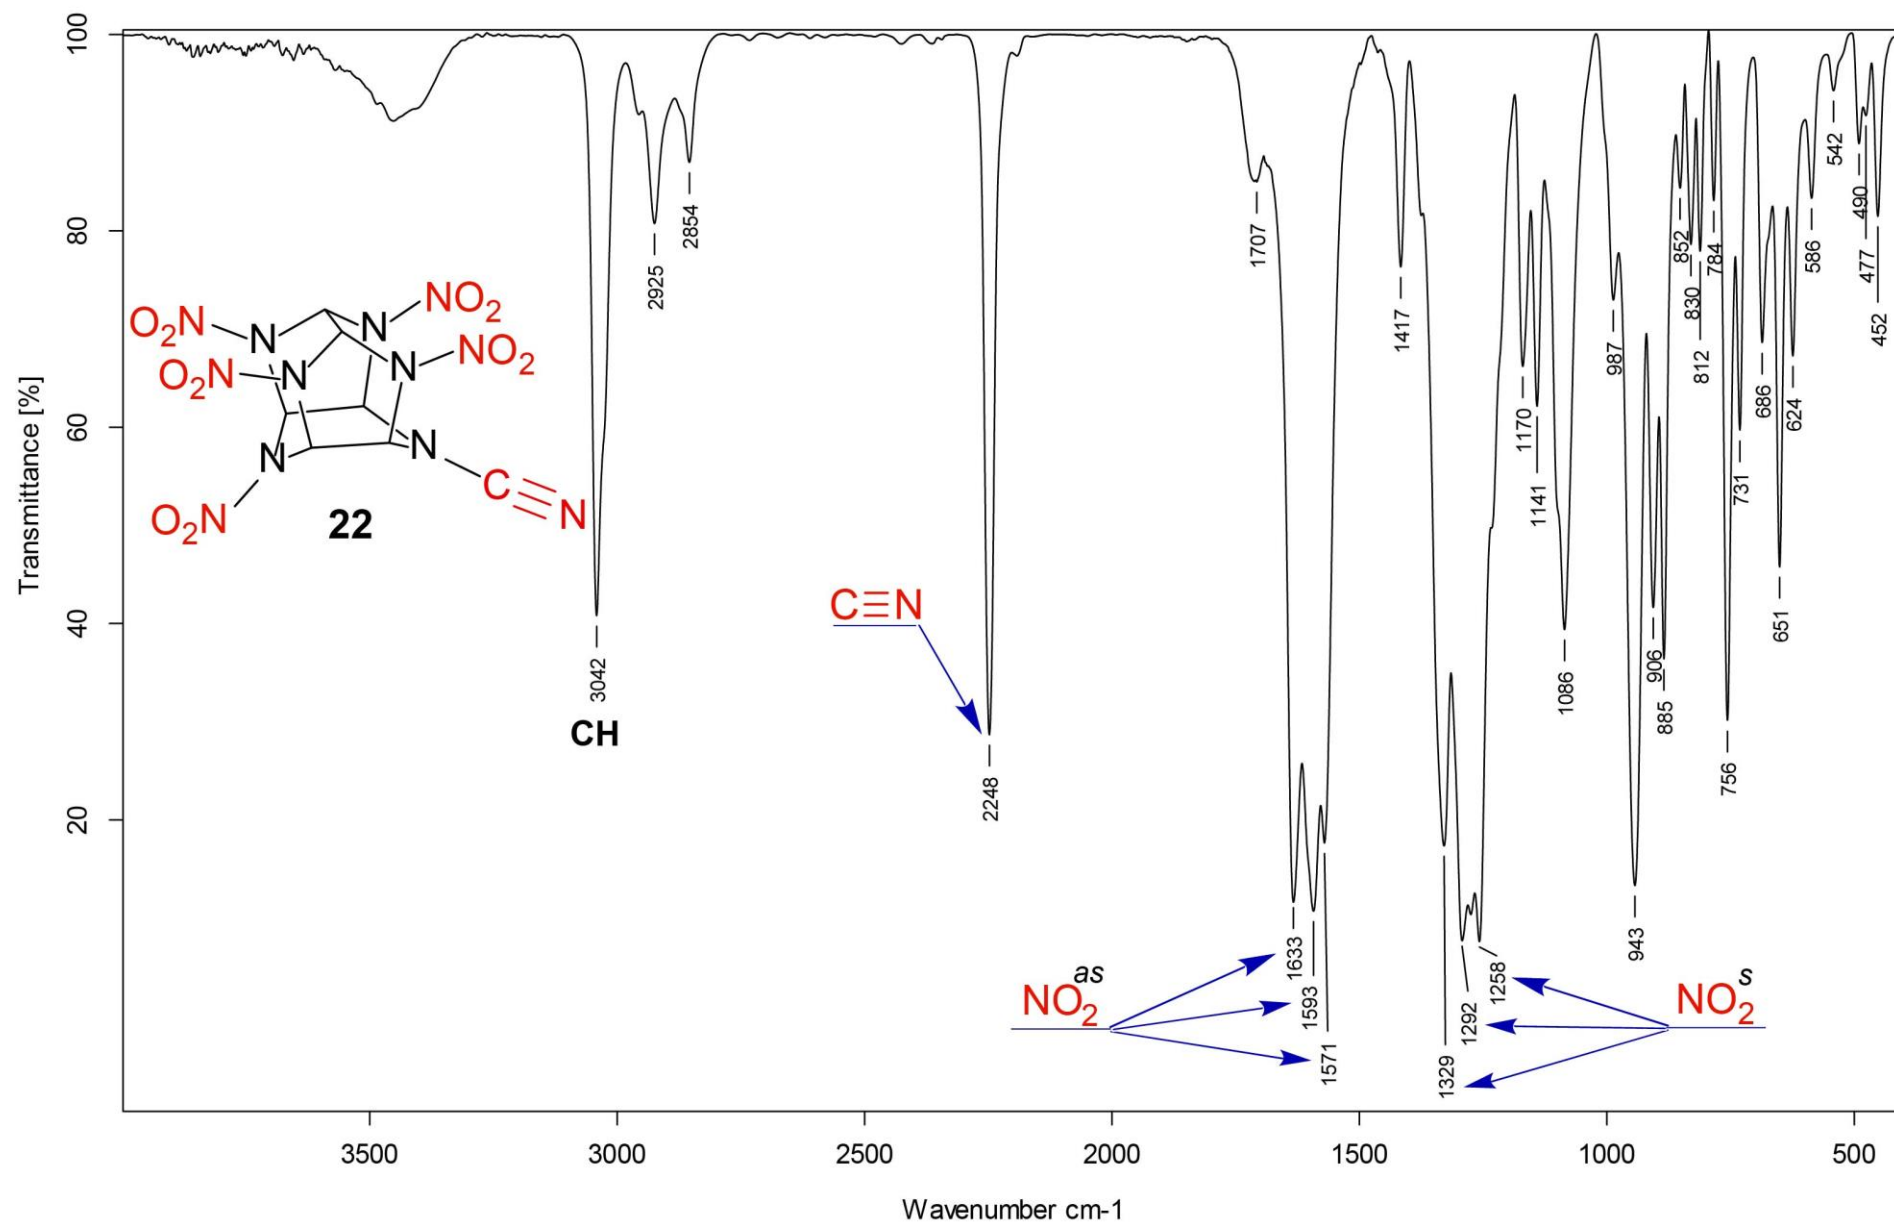

**$^1\text{H}$  NMR (300.1 MHz,  $[\text{D}_6]$ acetone) spectrum of compound 21**

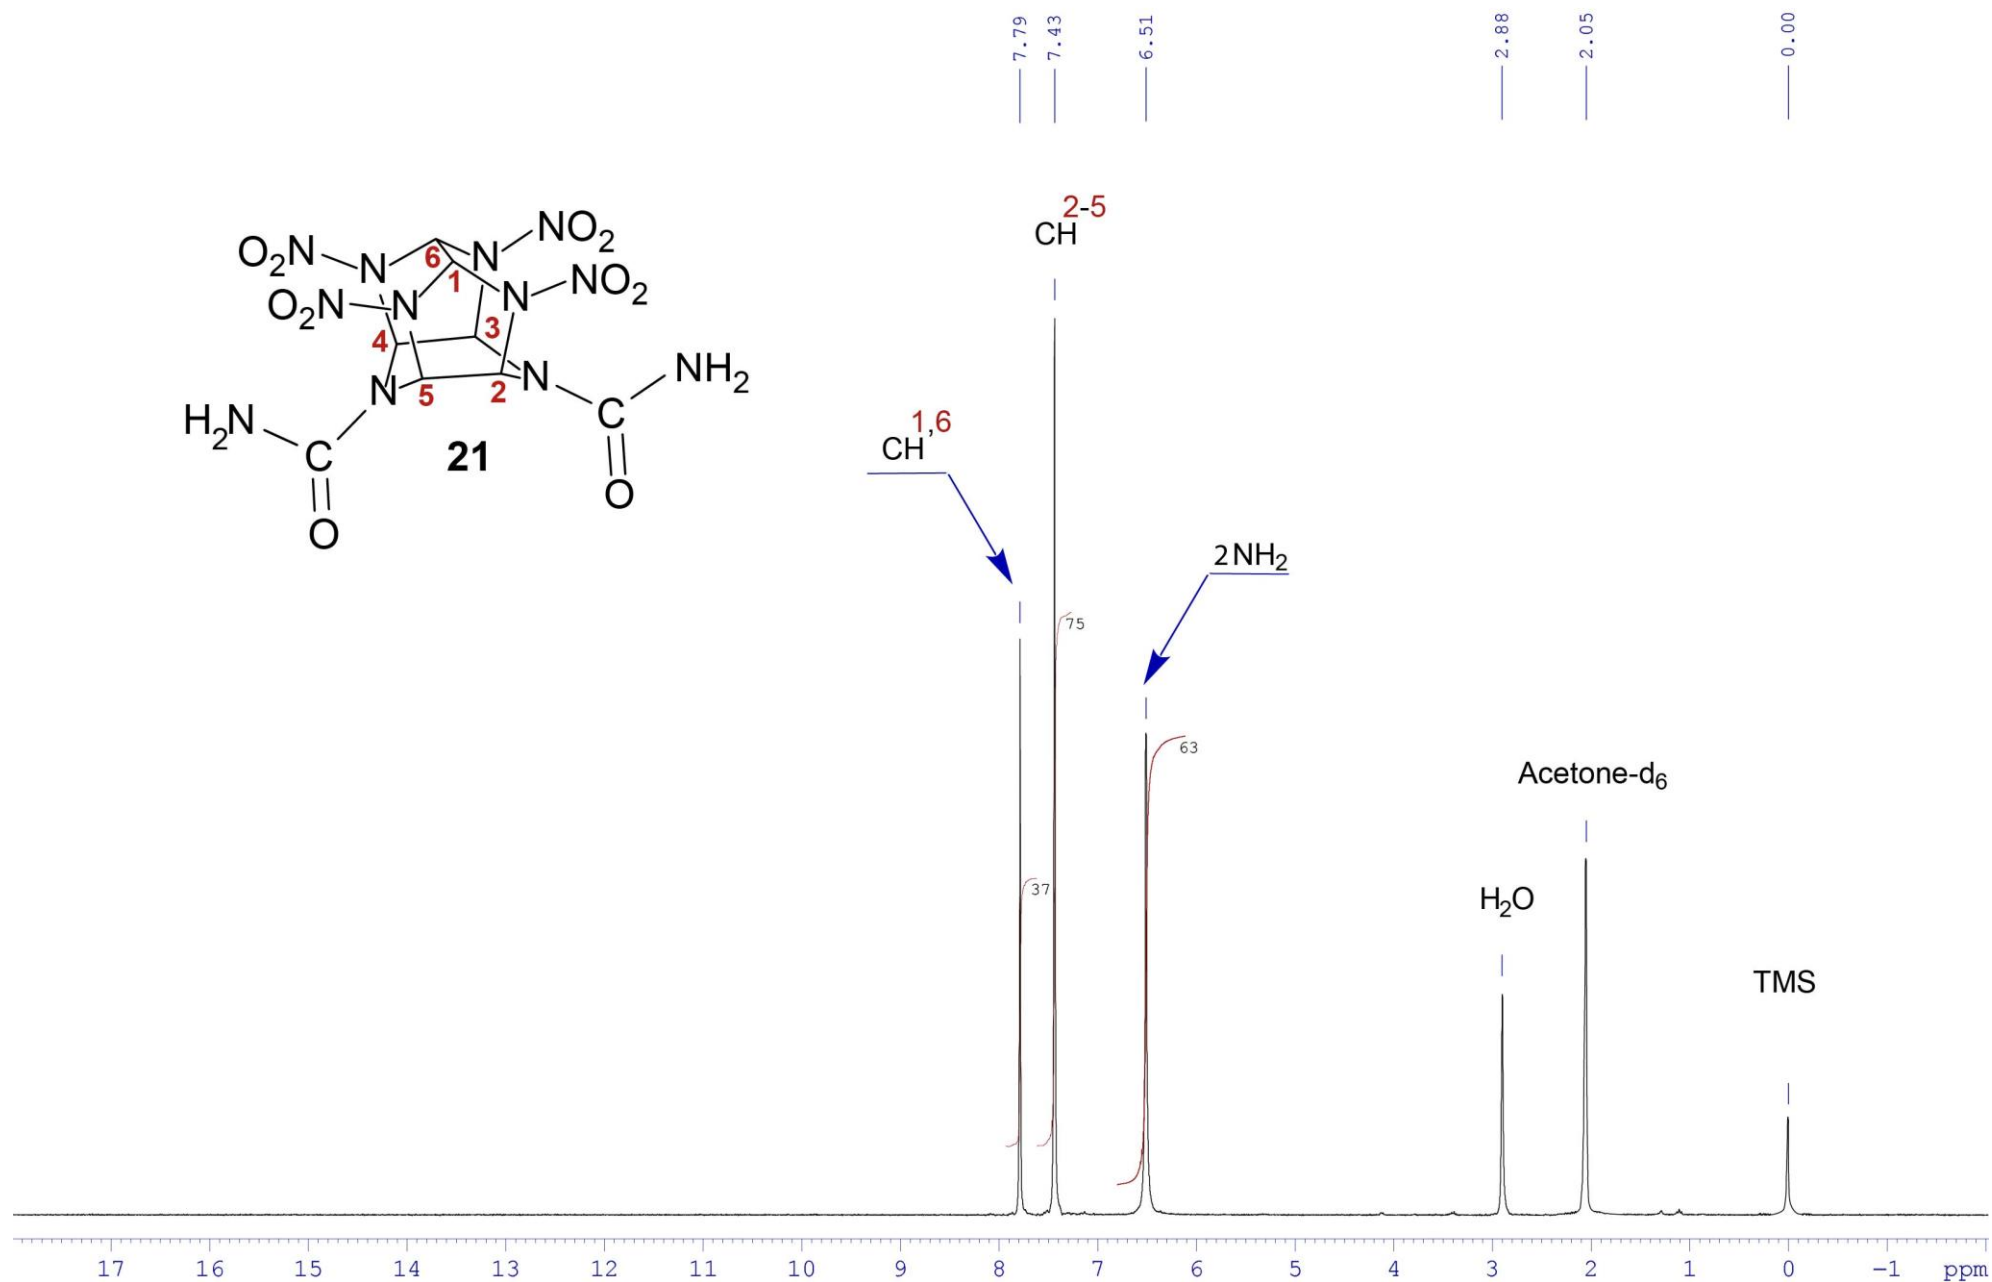

# $^{13}\text{C}$ NMR (75.5 MHz, $[\text{D}_6]$ acetone) spectrum of compound 21

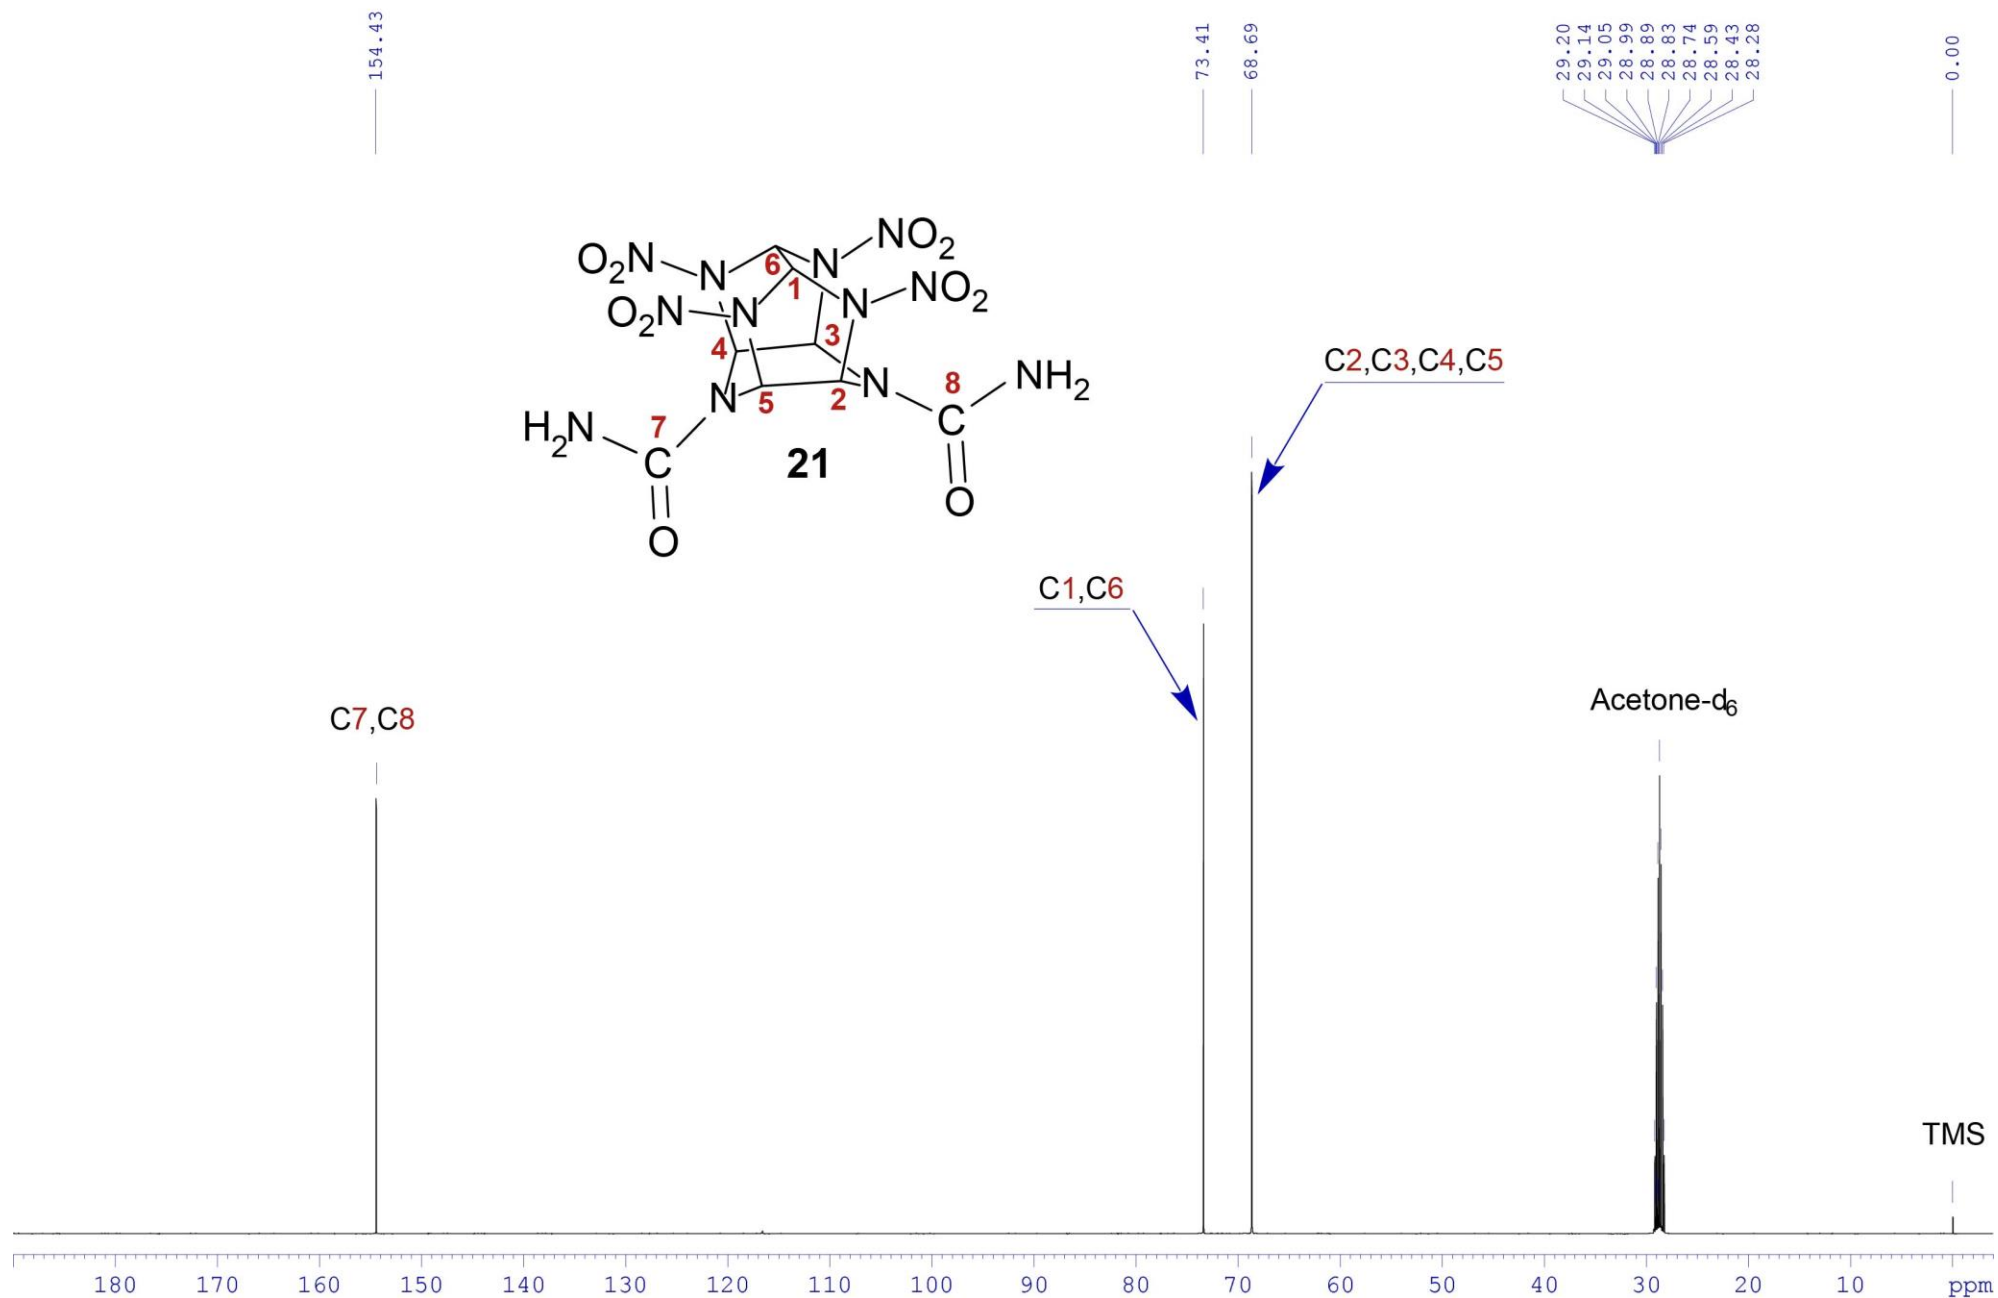

**$^{14}\text{N}$  NMR (21.7 MHz,  $[\text{D}_6]\text{acetone}$ ) spectrum of compound 21**

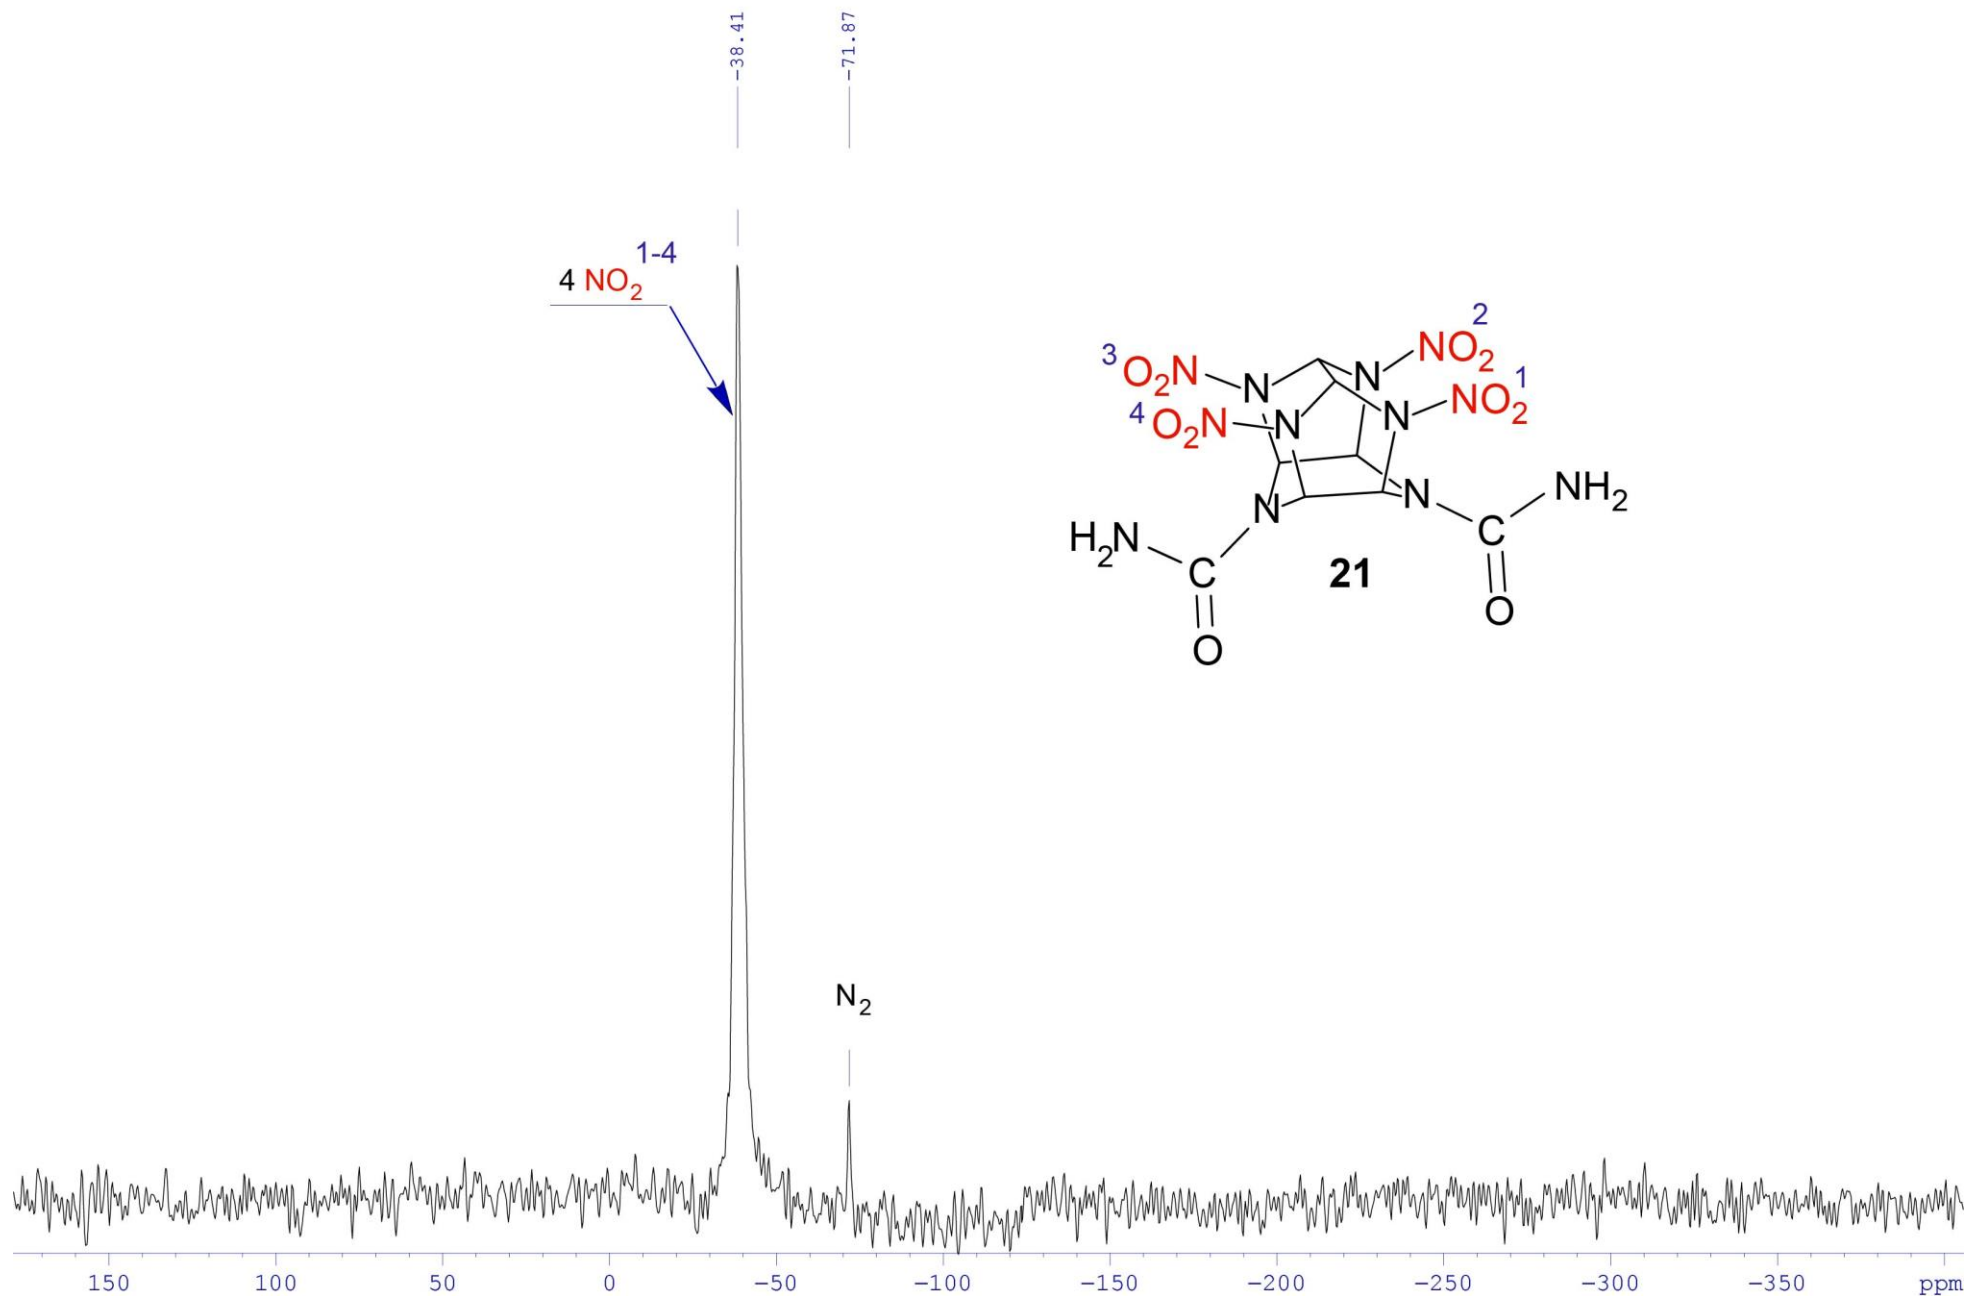

# IR (KBr) spectrum of compound 21

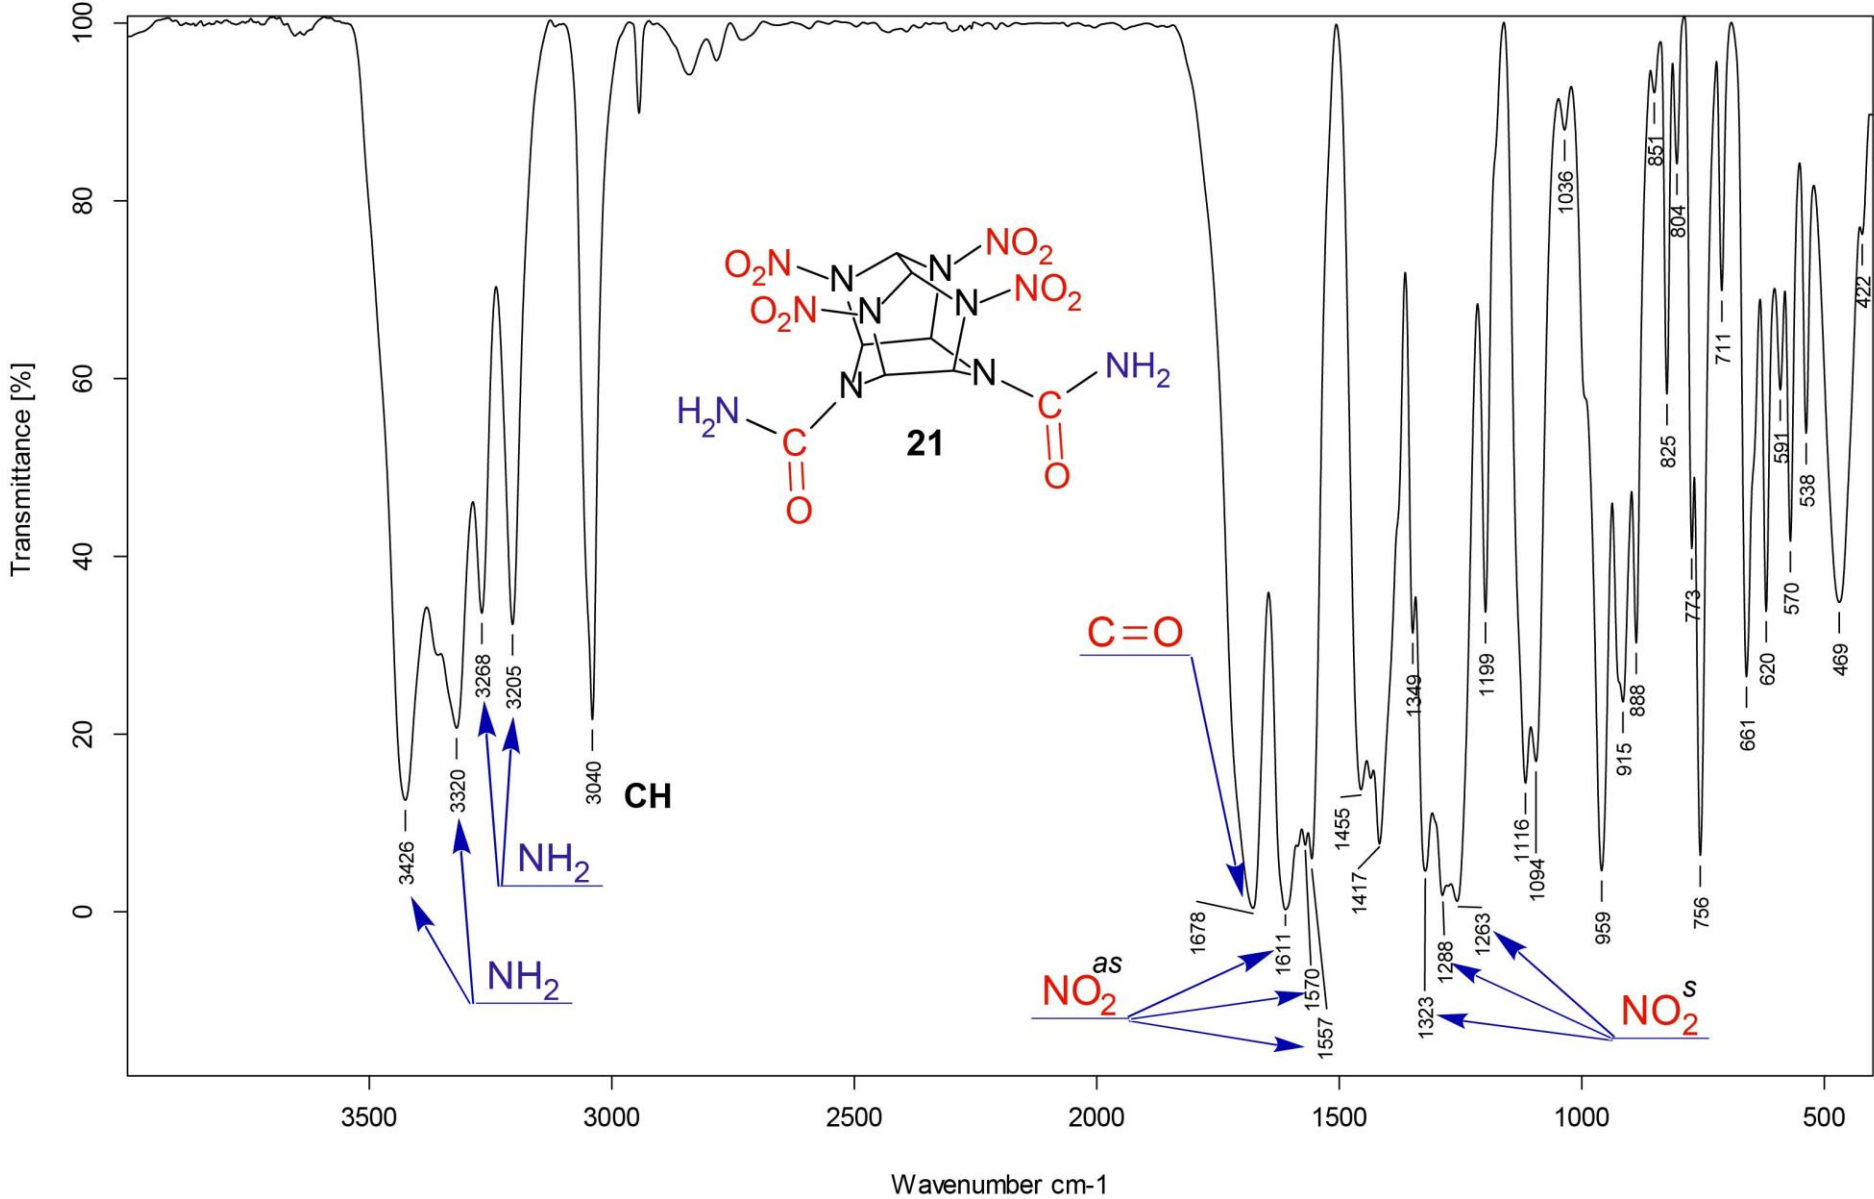

# HRMS (ESI) for compound 21

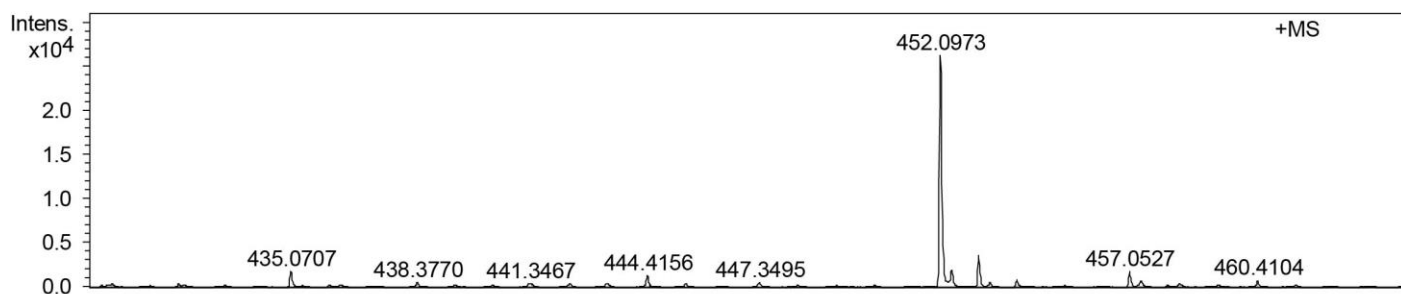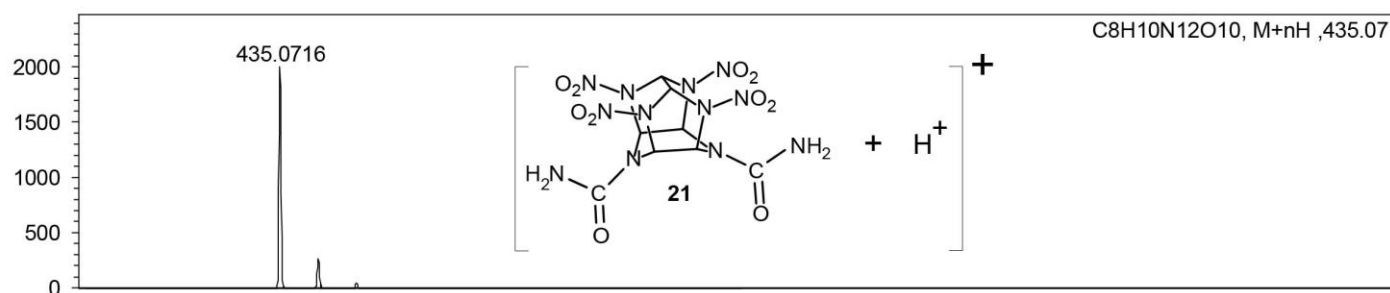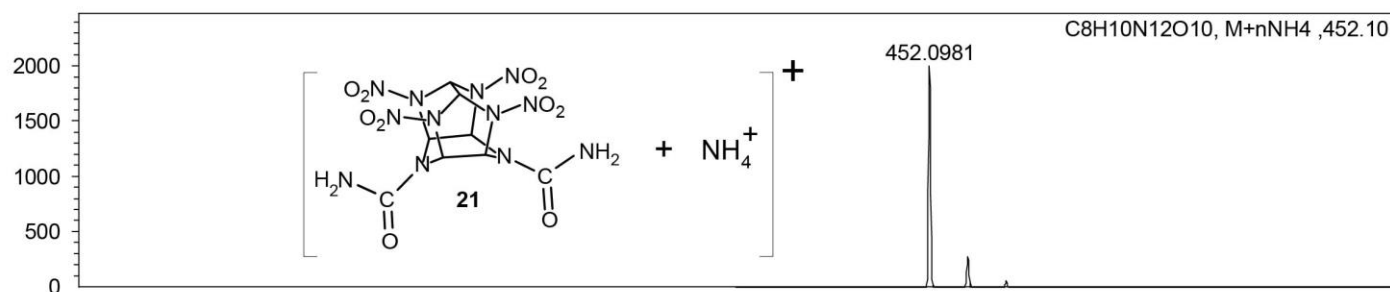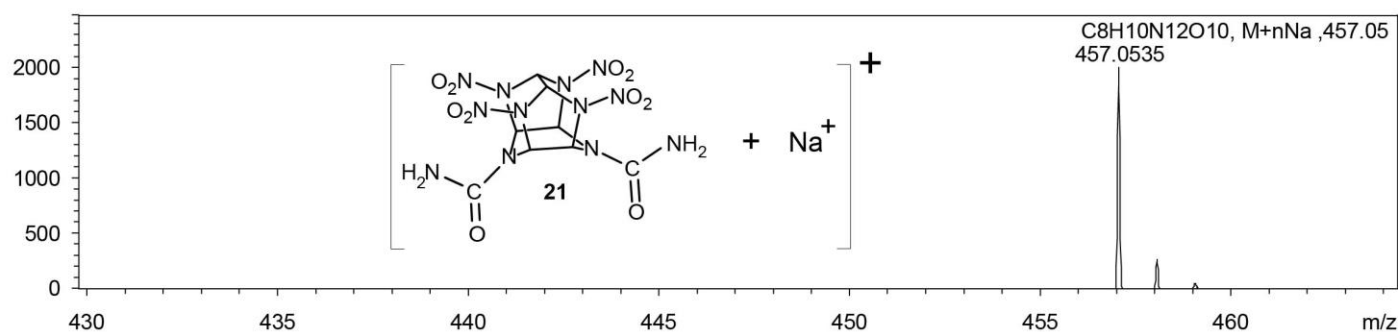

**$^1\text{H}$  NMR (300.1 MHz,  $[\text{D}_6]$ acetone) spectrum of compound 23**

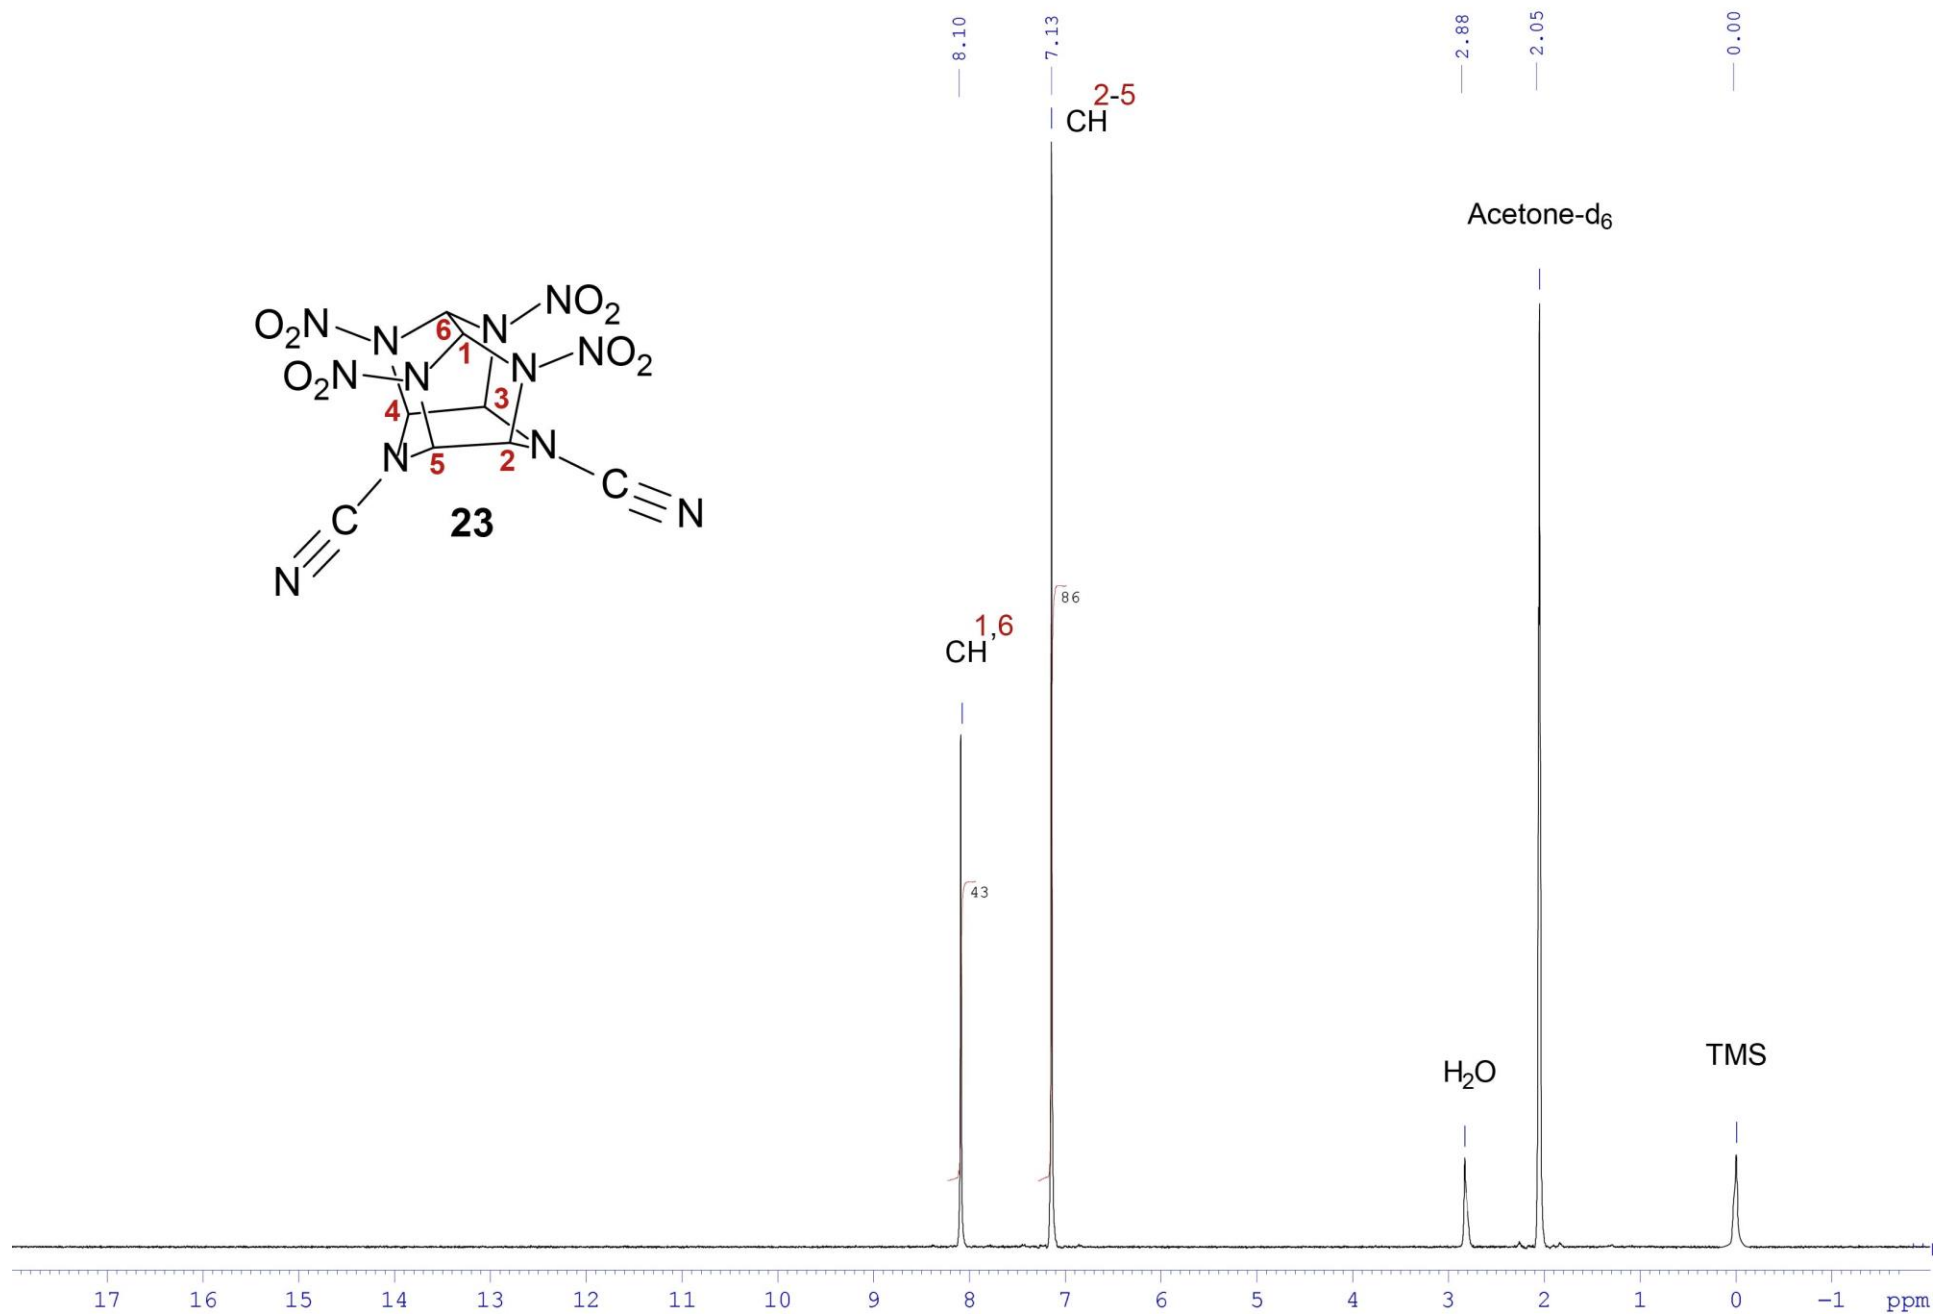

**$^1\text{H}$  NMR (600.13 MHz,  $[\text{D}_6]\text{DMSO}$ ) spectrum of compound 23**

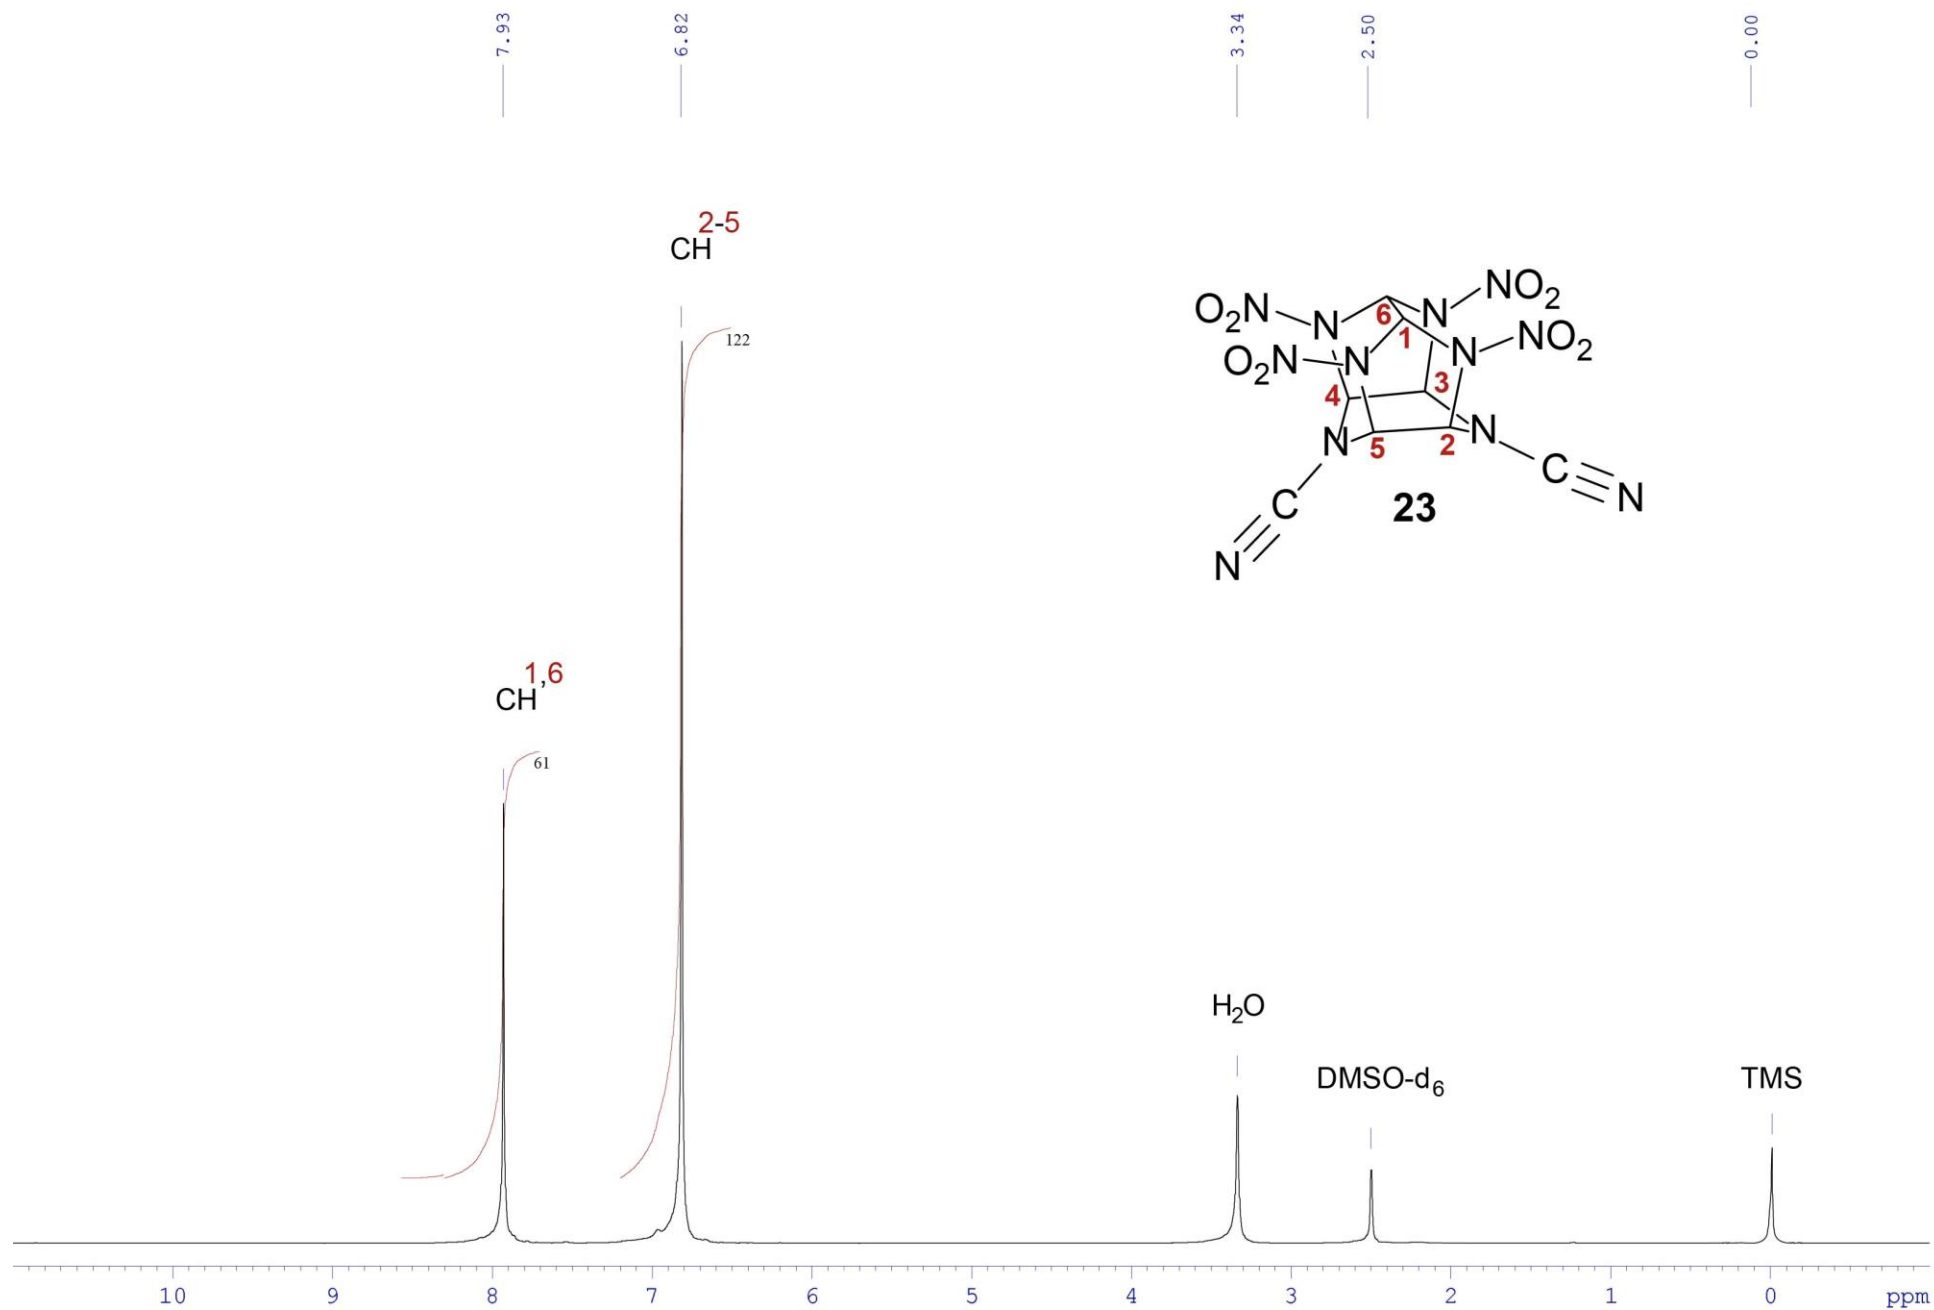

**$^{13}\text{C}$  NMR (150.9 MHz,  $[\text{D}_6]\text{DMSO}$ ) spectrum of compound 23**

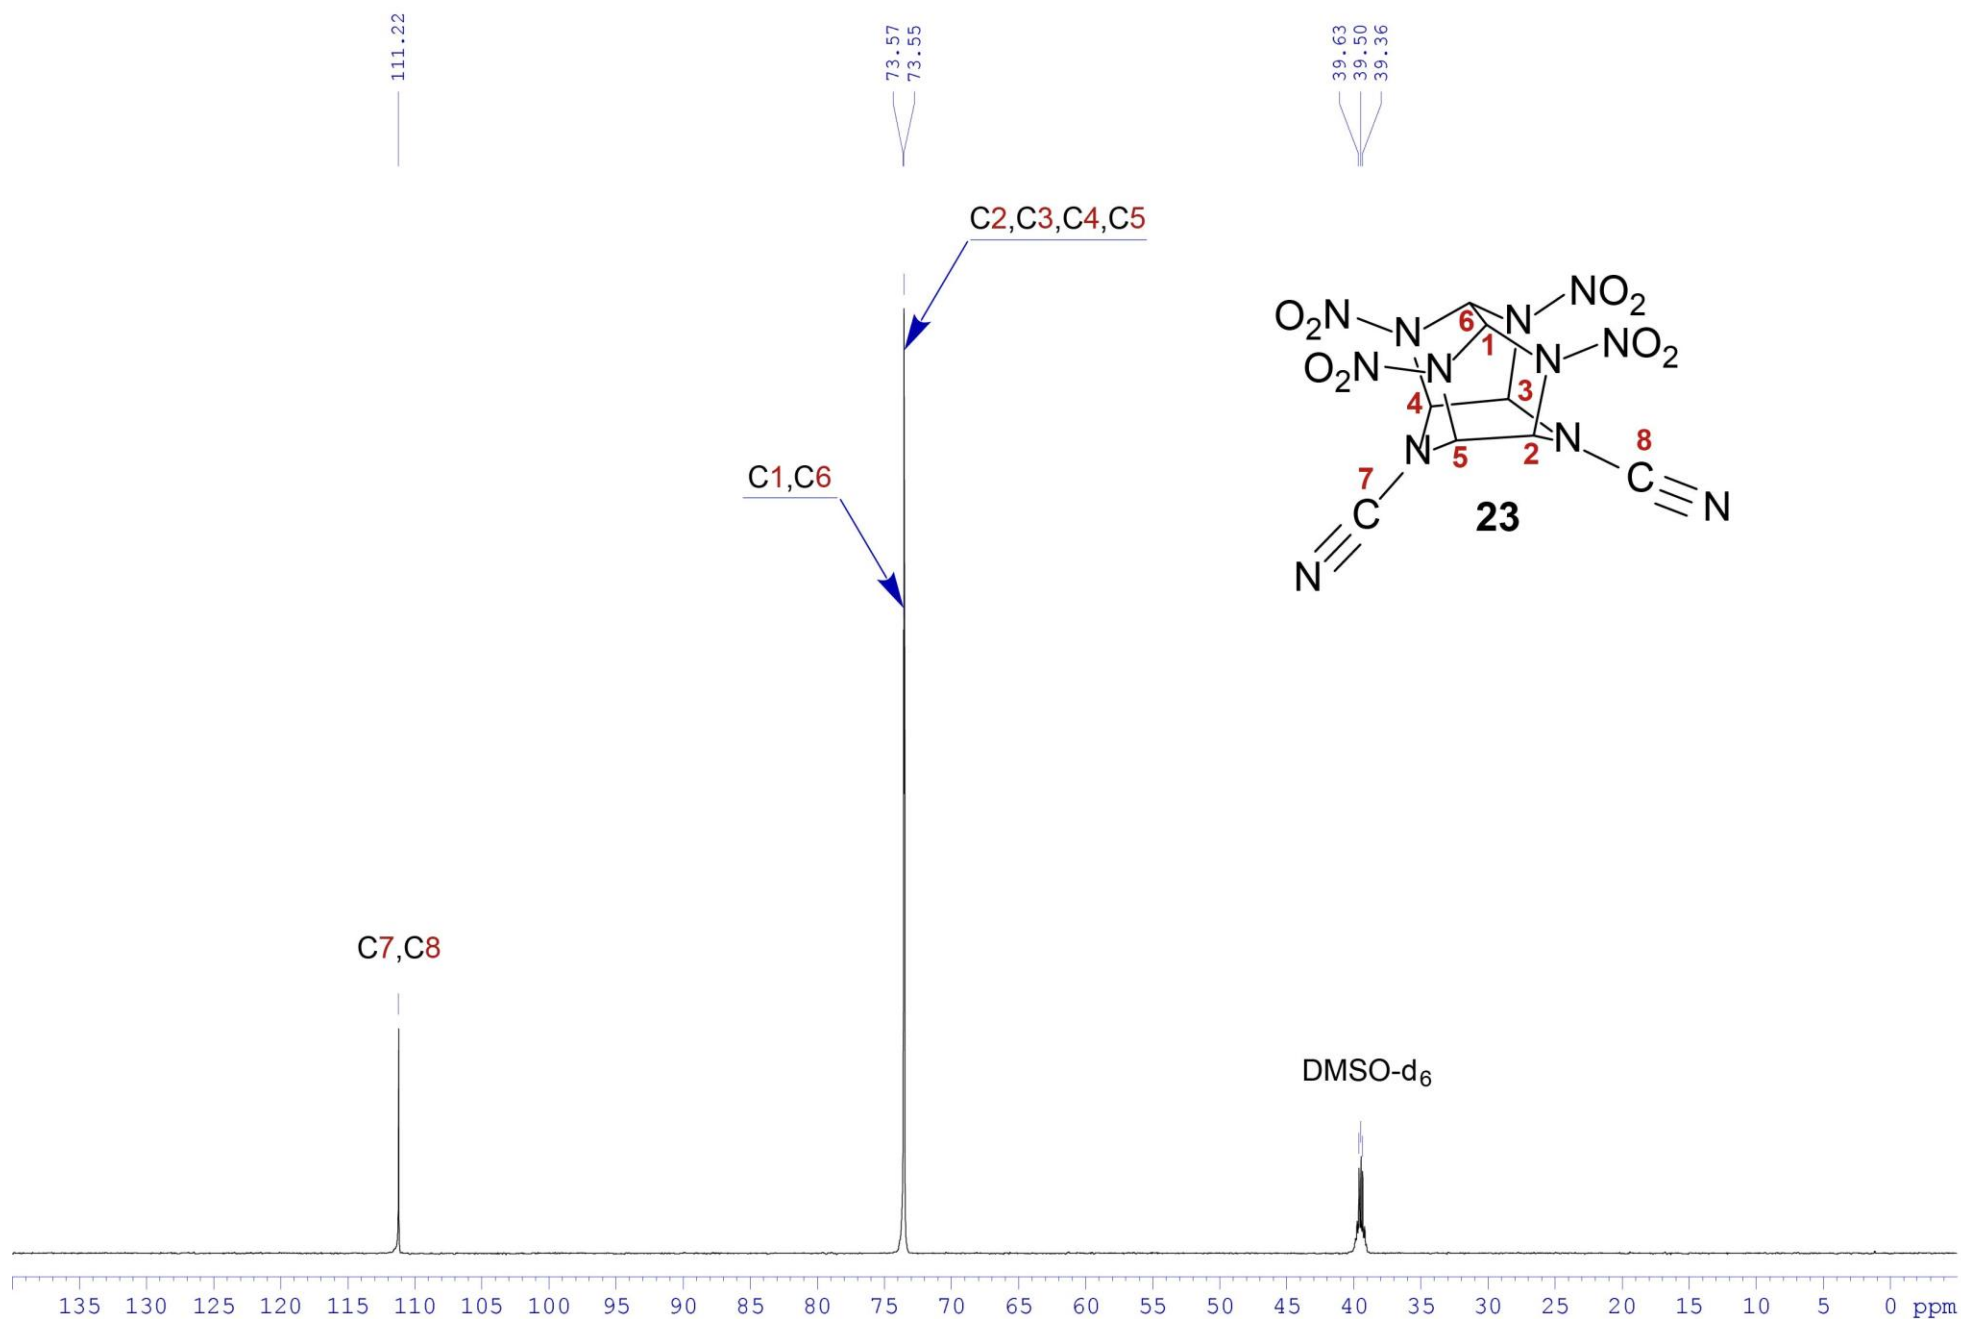

**{ $^1\text{H}$ - $^{13}\text{C}$ } HSQC NMR (600.13 MHz,  $[\text{D}_6]\text{DMSO}$ ) spectrum of compound 23**

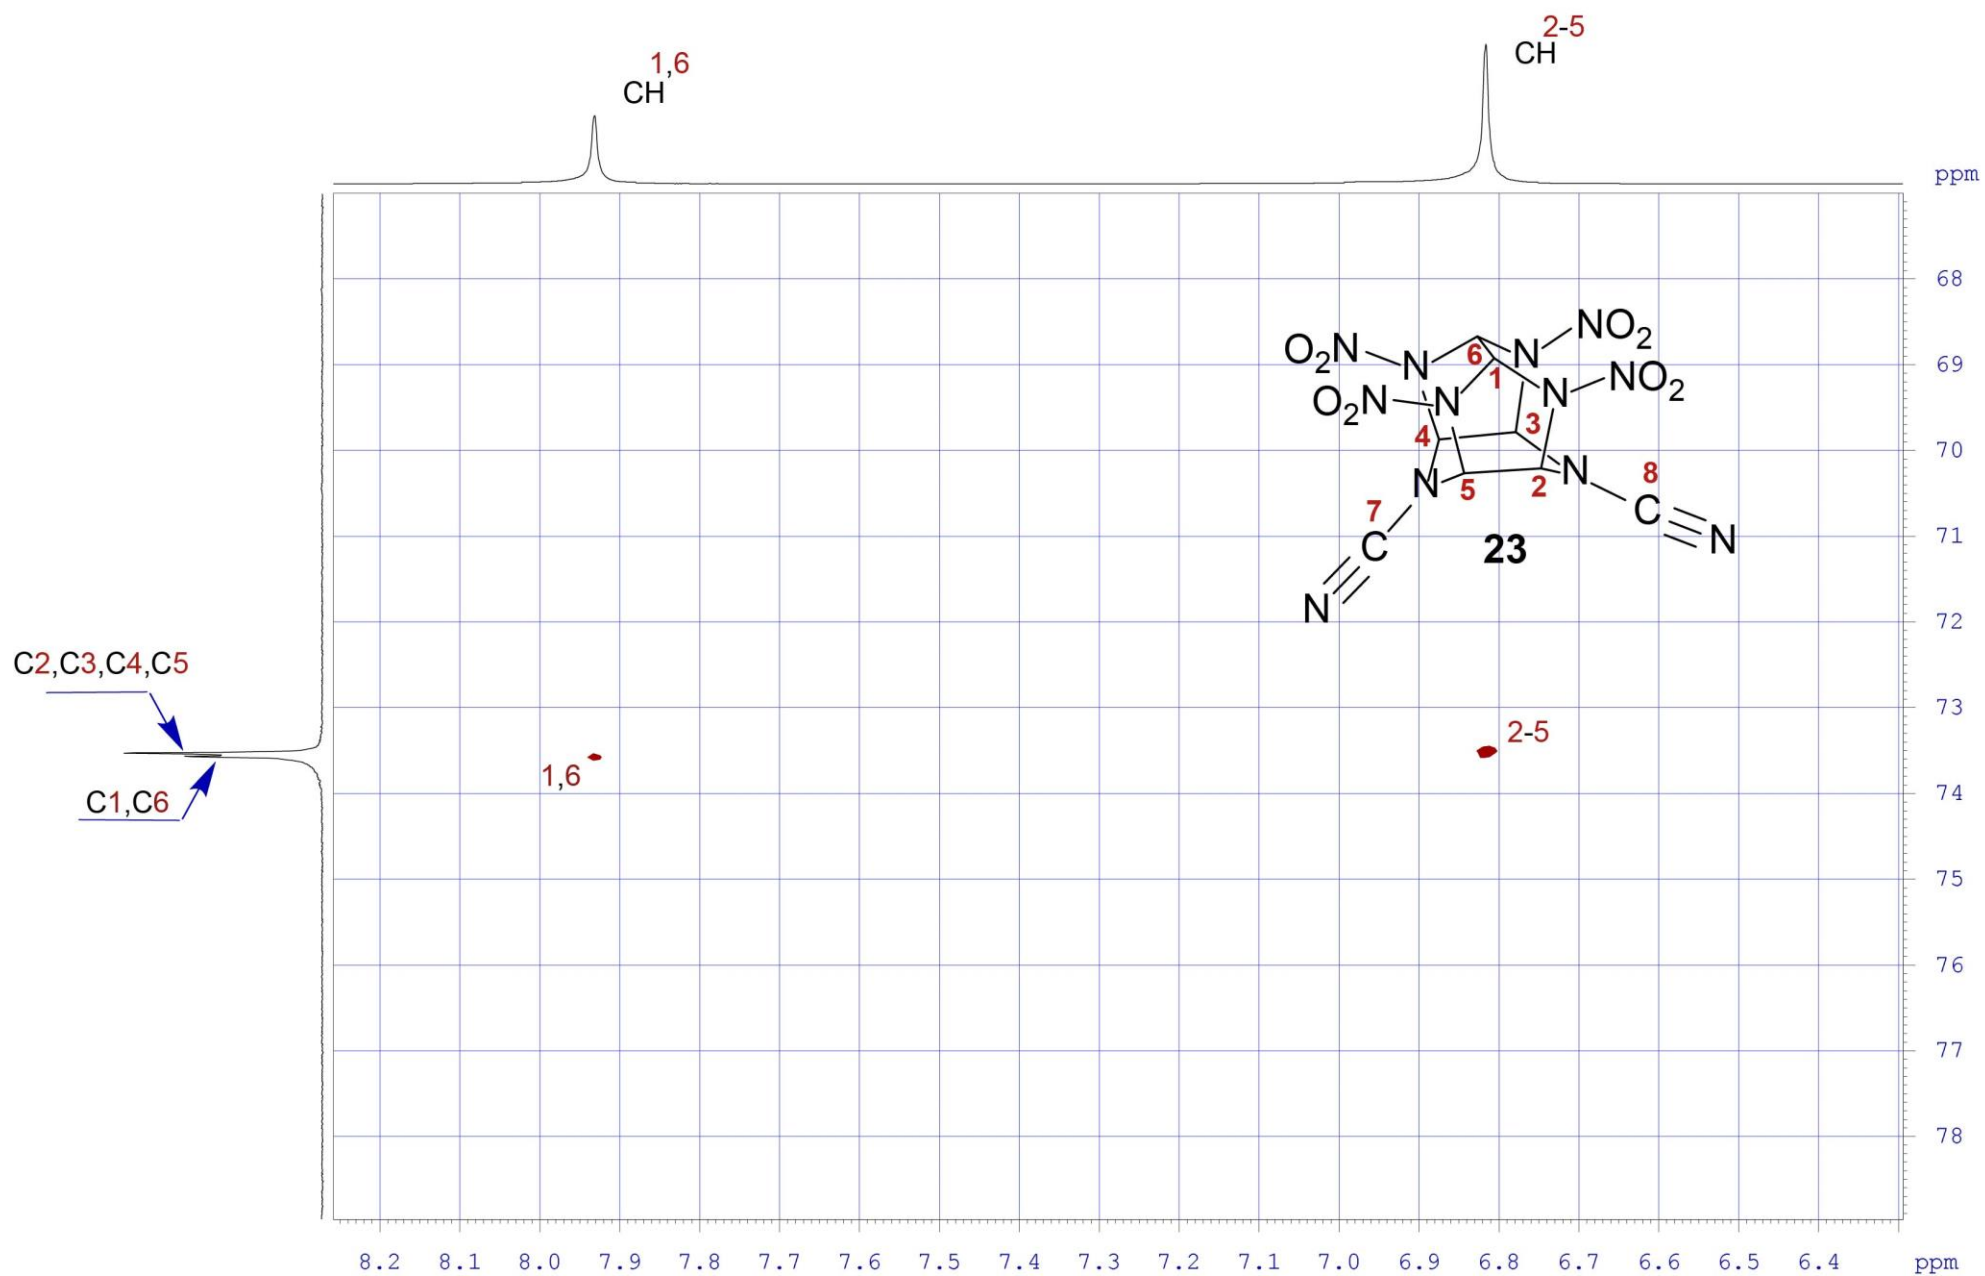

**$\{^1\text{H}-^{13}\text{C}\}$  HMBC NMR (600.13 MHz,  $[\text{D}_6]\text{DMSO}$ ) spectrum of compound 23**

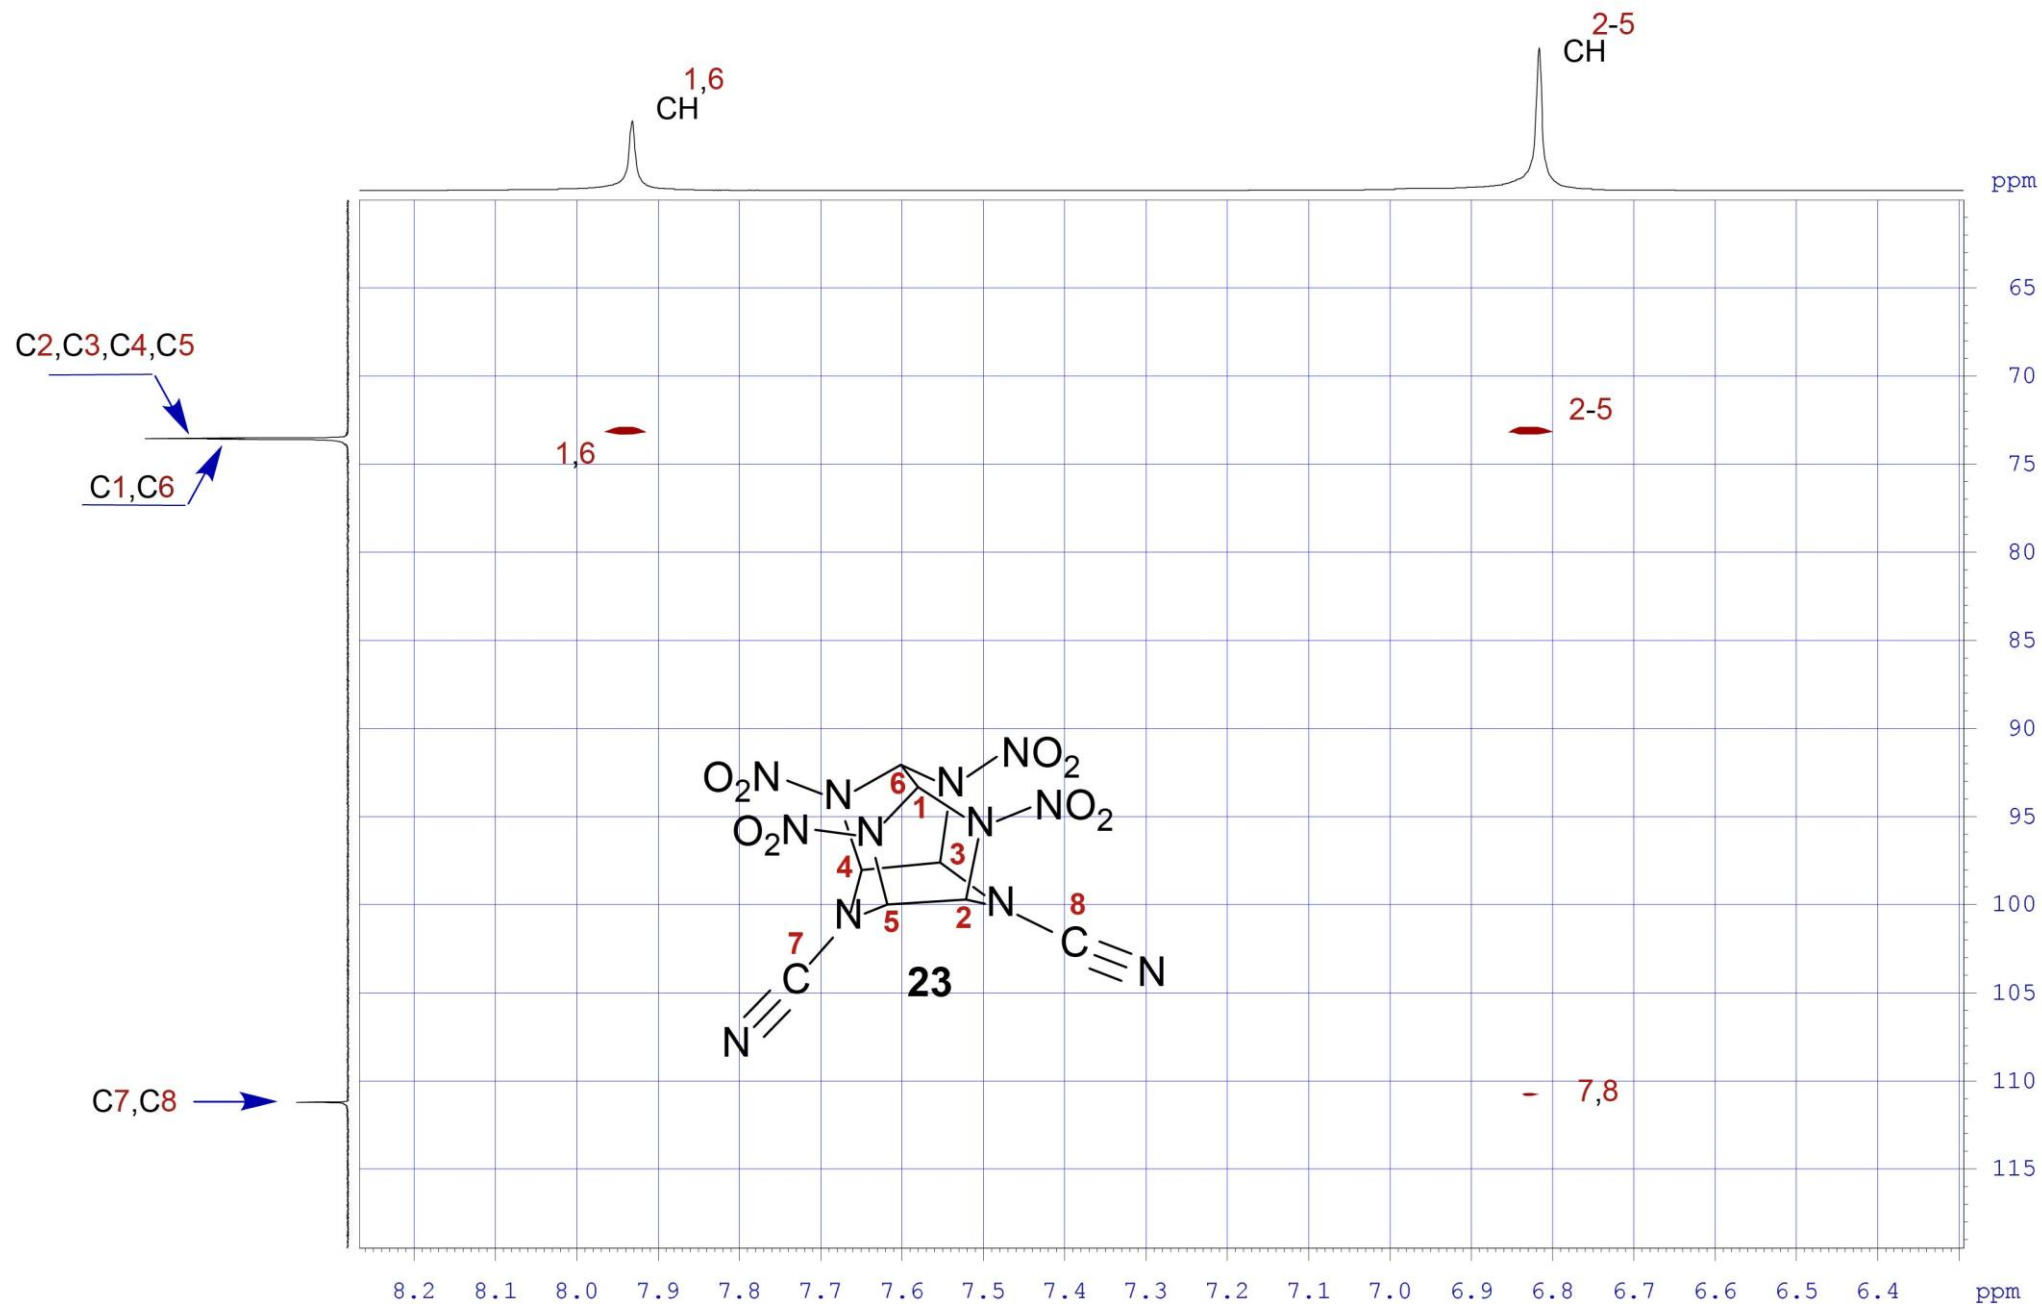

**$^{14}\text{N}$  NMR (43.37 MHz,  $[\text{D}_6]\text{DMSO}$ ) spectrum of compound 23**

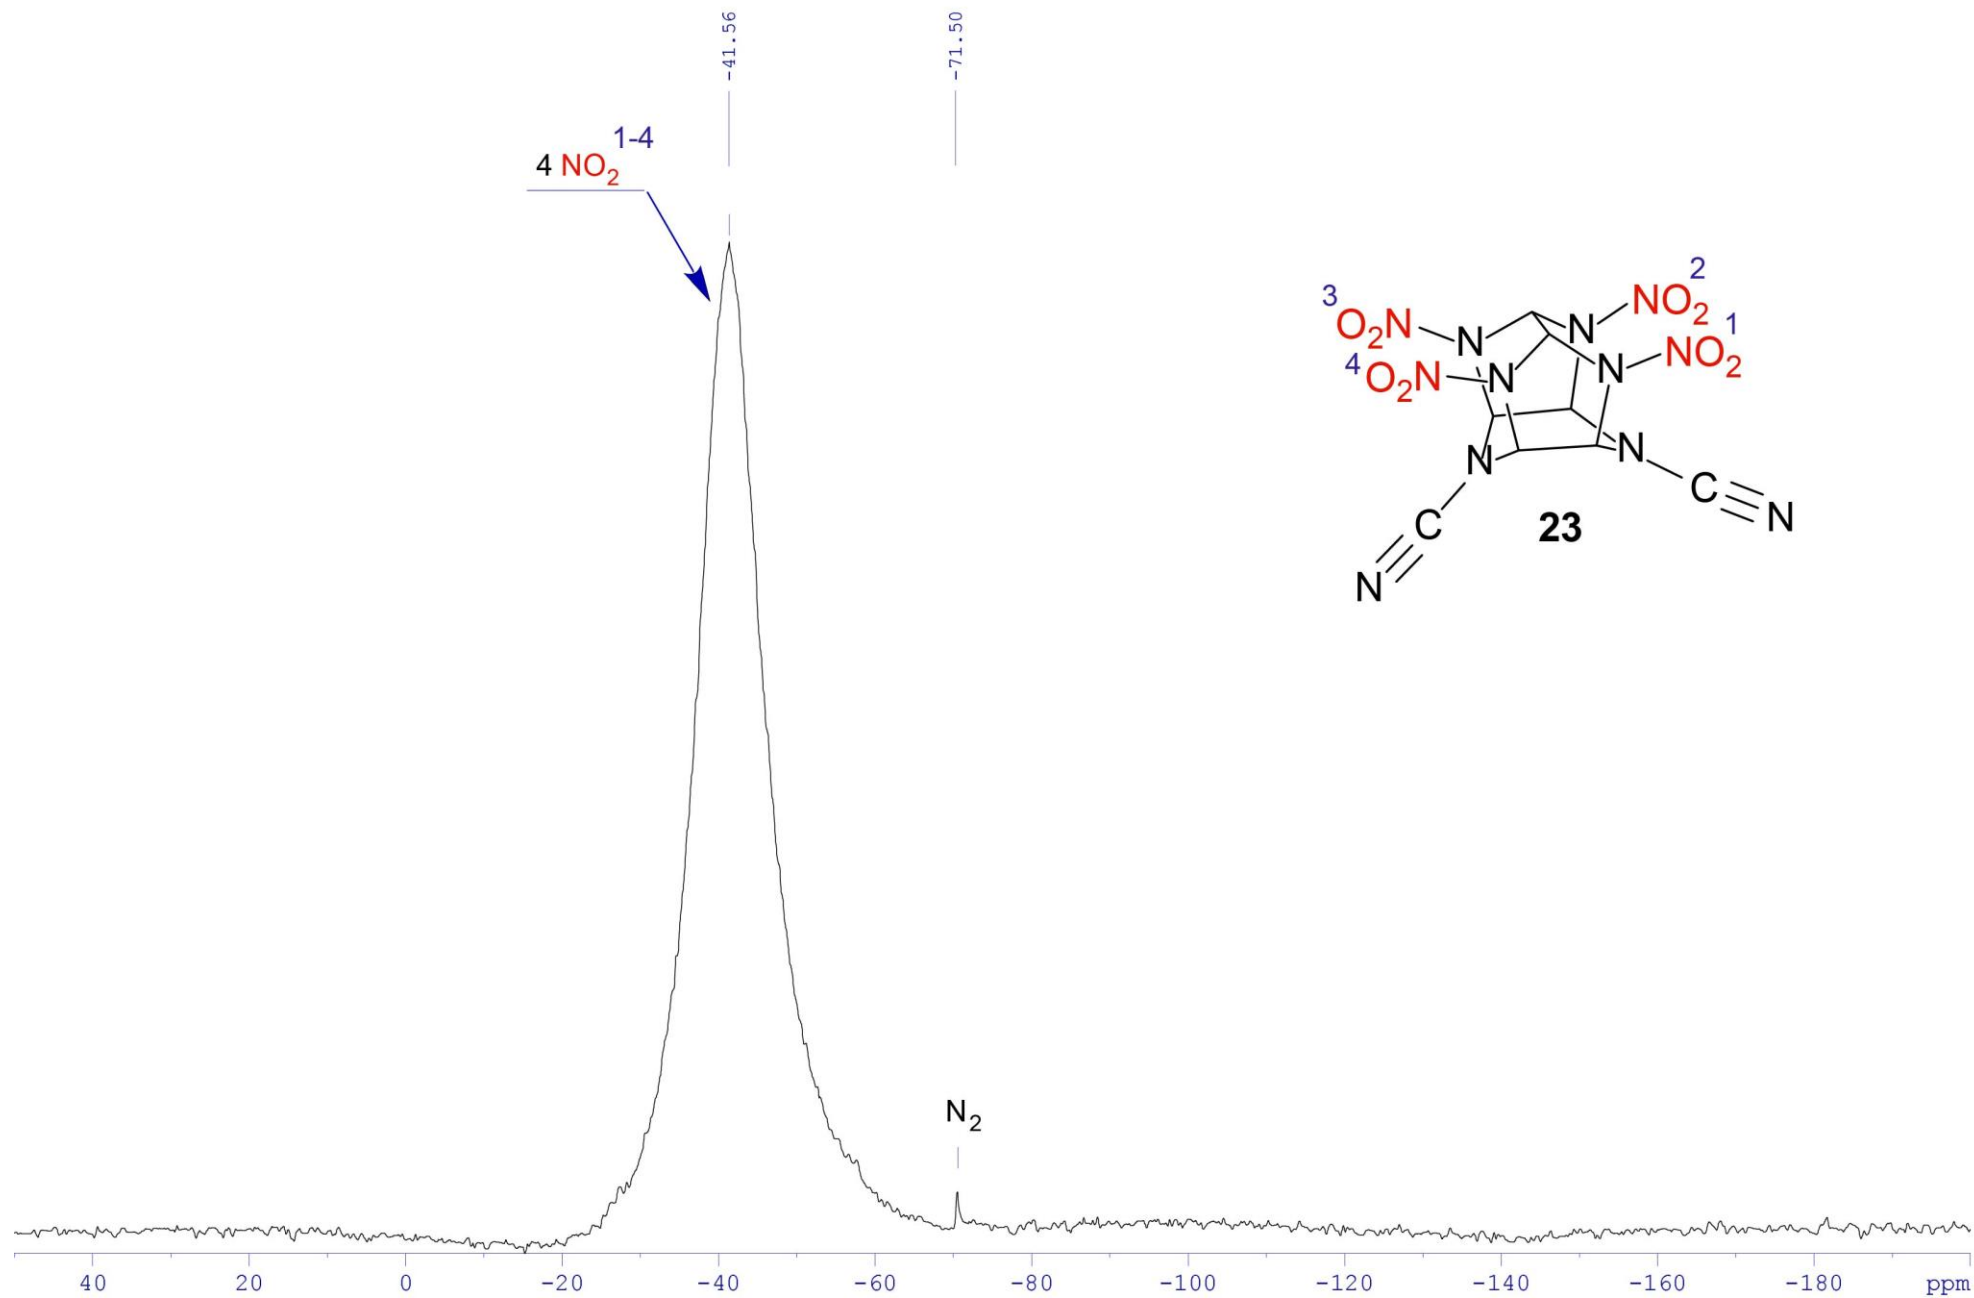

**$^{15}\text{N}$  NMR ([INVGATED], [INEPT], 60.8 MHz,  $[\text{D}_6]\text{DMSO}$ ) spectrum of compound 23**

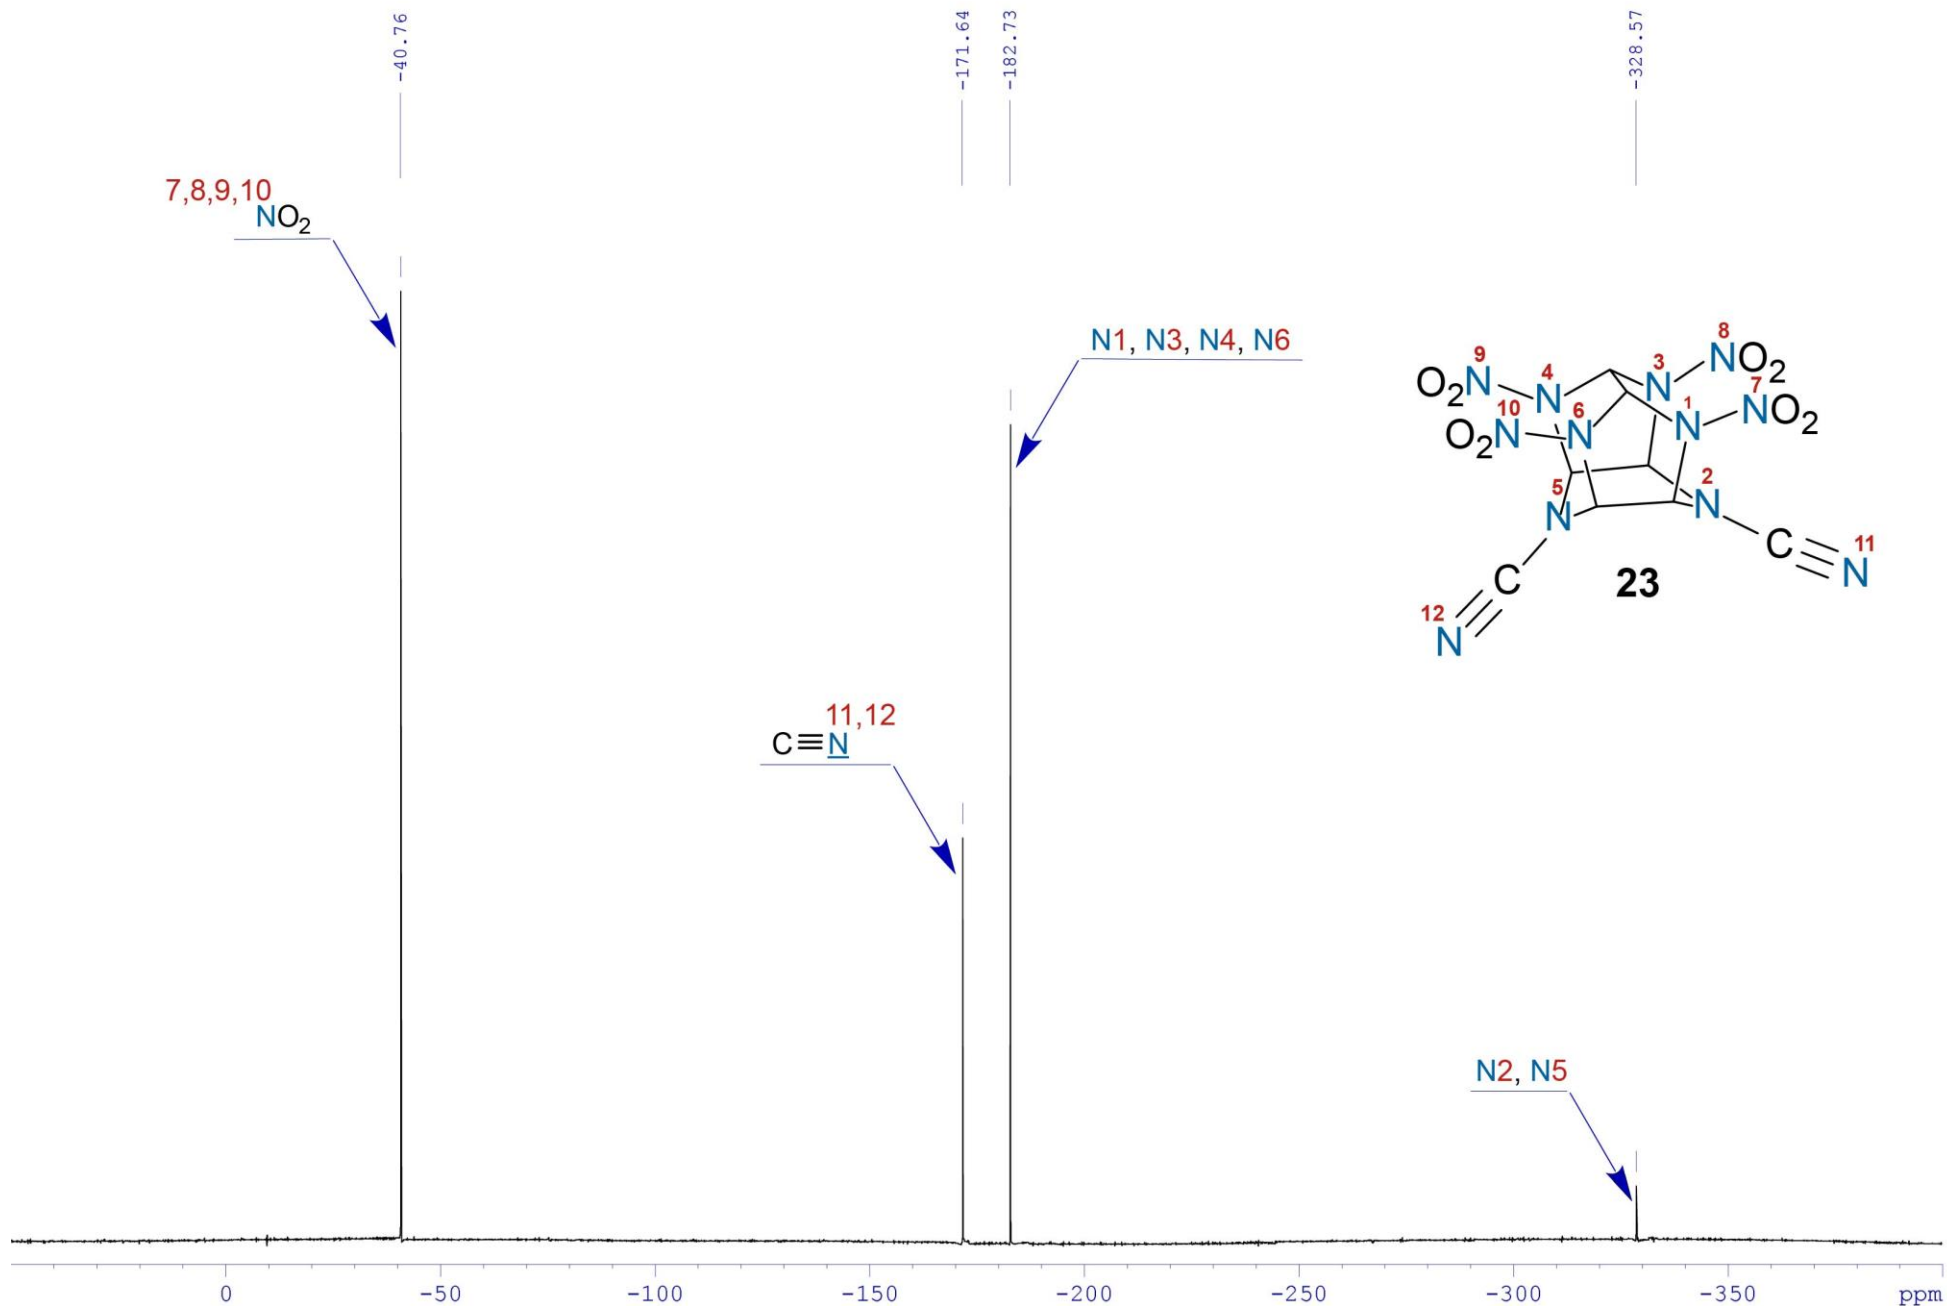

# IR (KBr) spectrum of compound 23

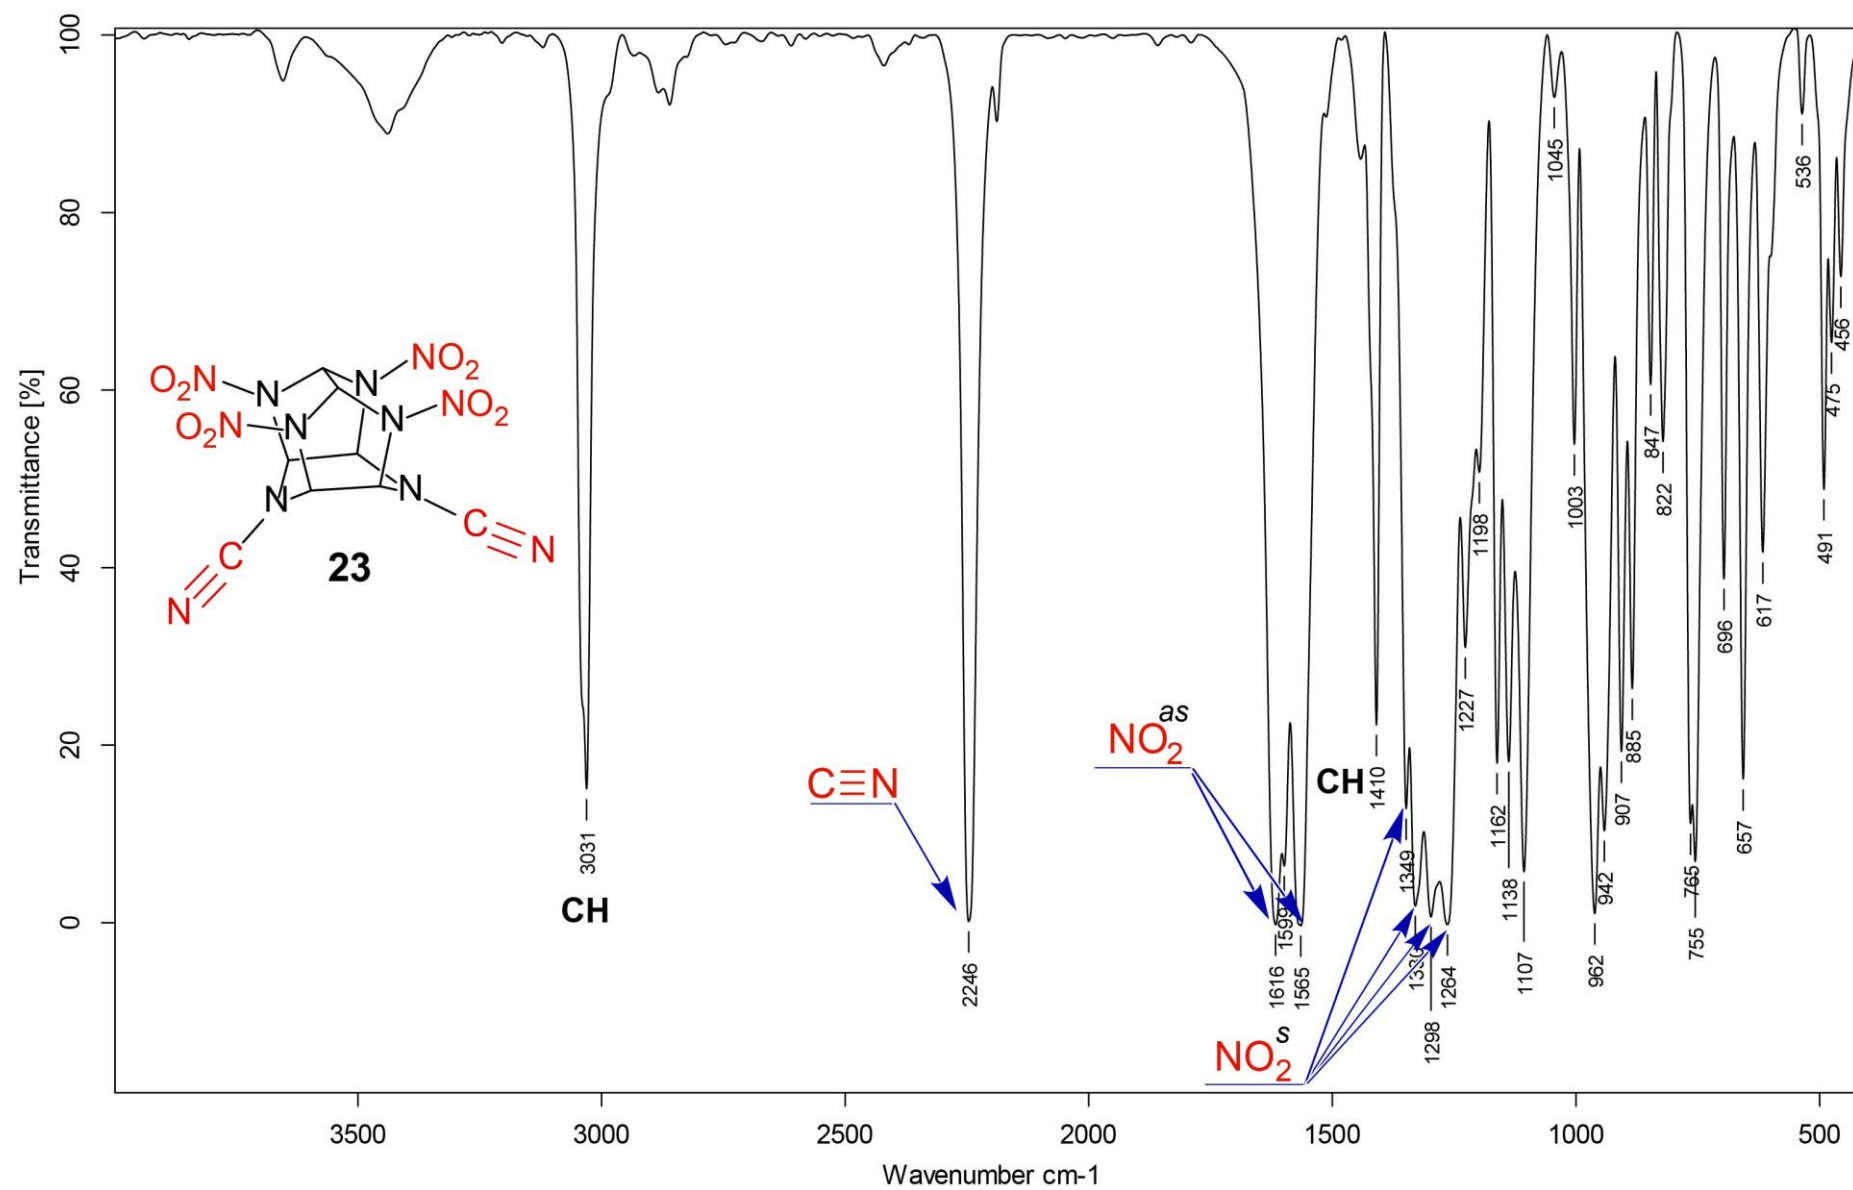

General formula of 4-carbomoyl-2,6,8,12-tetranitroisowurtzitanes **4**, **10**, **14**, **20** and **21**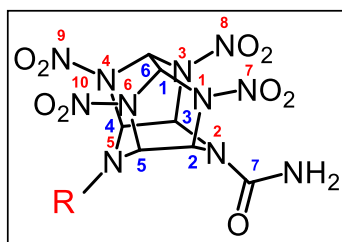

- 4:** R = H;  
**10:** R = NO;  
**14:** R = <sup>8</sup>CH<sub>2</sub><sup>9</sup>C(<sup>11</sup>NO<sub>2</sub>)<sub>3</sub>;  
**20:** R = <sup>11</sup>NO<sub>2</sub>;  
**21:** R = <sup>8</sup>CN.

**Table 1** Assigned <sup>1</sup>H, <sup>13</sup>C{<sup>1</sup>H}, and <sup>14</sup>N NMR shifts [ppm] of **4**, **10**, **14**, **20** and **21** in DMSO-d<sub>6</sub> or Acetone-d<sub>6</sub>.

| Nucleus                                                     | Assignment |                                           | Compounds                                        |                                  |                        |                     |                        |
|-------------------------------------------------------------|------------|-------------------------------------------|--------------------------------------------------|----------------------------------|------------------------|---------------------|------------------------|
|                                                             | Part       | Groups                                    | Chemical shifts δ, ppm                           |                                  |                        |                     |                        |
|                                                             |            |                                           | <b>4</b>                                         | <b>10</b>                        | <b>14</b>              | <b>20</b>           | <b>21</b>              |
|                                                             | Solvent    |                                           | DMSO-d <sub>6</sub><br>[Acetone-d <sub>6</sub> ] | Acetone-d <sub>6</sub>           | Acetone-d <sub>6</sub> | DMSO-d <sub>6</sub> | Acetone-d <sub>6</sub> |
| <sup>1</sup> H<br>(J <sub>H,H</sub> , Hz)                   | Cage       | CH <sup>1,6</sup>                         | 7.65 s<br>[7.68 s]                               | 7.95 s                           | 7.84 s                 | 7.93 s              | 7.79 s                 |
|                                                             |            | CH <sup>2,3</sup>                         | 6.93 bs<br>[7.33 d (8)]                          | 7.47 dd (8, 2)<br>7.83 dd (8, 2) | 7.44 d (8)             | 7.39 d (7)          | 7.43 s                 |
|                                                             |            | CH <sup>4,5</sup>                         | 6.16 bs<br>[6.42 d (7)]                          | 7.92 dd (8, 2)<br>8.12 dd (8, 3) | 6.72 d (8)             | 7.79 d (7)          |                        |
|                                                             | Units      | NH <sub>2</sub>                           | 7.10 bs<br>[6.32 bs]                             | 6.51 bs                          | 6.42 bs                | 7.09 bs             | 6.51 bs                |
|                                                             |            | N <sup>5</sup> –H                         | 6.30 bs<br>[5.71 bs]                             |                                  |                        | –                   |                        |
|                                                             |            | N <sup>5</sup> –CH <sub>2</sub>           |                                                  | –                                | 5.51 s                 |                     | –                      |
| <sup>13</sup> C{ <sup>1</sup> H}<br>(J <sub>C,F</sub> , Hz) | Cage       | C <sup>1,6</sup>                          | 72.3                                             | 74.9<br>75.1                     | 70.2                   | 73.4                | 73.4                   |
|                                                             |            | C <sup>2,3</sup>                          | 68.0                                             | 70.6<br>73.2                     | 74.2                   | 70.0                | 68.7                   |
|                                                             |            | C <sup>4,5</sup>                          | 71.4                                             | 61.1<br>71.5                     | 78.0                   | 70.2                |                        |
|                                                             |            | C=O                                       | 154.7                                            | 155.3                            | 155.0                  | 154.2               | 154.4                  |
|                                                             | Units      | N <sup>5</sup> –CH <sub>2</sub>           |                                                  |                                  | 55.4                   |                     |                        |
|                                                             |            | C(NO <sub>2</sub> ) <sub>3</sub>          |                                                  | –                                | 127.9                  |                     | –                      |
| <sup>14</sup> N<br>(Δv <sub>1/2</sub> , Hz)                 | Cage       | NNO <sub>2</sub> <b>7–10<br/>(and 11)</b> | –36 (365)                                        | –40 (100)                        | –38 (113)              | –39 (431)           | –38 (130)              |
|                                                             | Units      | CNO <sub>2</sub>                          |                                                  | –                                | –31 (33)               |                     | –                      |

General formula of 4-cyano-2,6,8,12-tetranitroisowutzitanes **5**, **6**, **15**, **22** and **23**

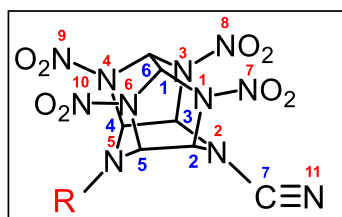

- 5:** R = H;  
**6:** R = <sup>12</sup>N<sup>10</sup>O;  
**15:** R = <sup>8</sup>CH<sub>2</sub><sup>9</sup>C(<sup>12</sup>NO<sub>2</sub>)<sub>3</sub>;  
**22:** R = <sup>12</sup>NO<sub>2</sub>;  
**23:** R = <sup>8</sup>C<sup>12</sup>N.

**Table 2** Assigned <sup>1</sup>H, <sup>13</sup>C{<sup>1</sup>H}, and <sup>14</sup>N NMR shifts [ppm] of **5**, **6**, **15**, **22** and **23** in acetone-d<sub>6</sub> or DMSO-d<sub>6</sub>.

| Nucleus                                                     | Assignment |                                  | Compounds                     |                        |                                 |                                                  |                                                  |
|-------------------------------------------------------------|------------|----------------------------------|-------------------------------|------------------------|---------------------------------|--------------------------------------------------|--------------------------------------------------|
|                                                             |            |                                  | Chemical shifts δ, ppm        |                        |                                 |                                                  |                                                  |
|                                                             | Part       | Groups                           | <b>5</b>                      | <b>6</b>               | <b>15</b>                       | <b>22</b>                                        | <b>23</b>                                        |
|                                                             | Solvent    |                                  | Acetone-d <sub>6</sub>        | Acetone-d <sub>6</sub> | Acetone-d <sub>6</sub>          | Acetone-d <sub>6</sub><br>[DMSO-d <sub>6</sub> ] | DMSO-d <sub>6</sub><br>[Acetone-d <sub>6</sub> ] |
| <sup>1</sup> H<br>(J <sub>H,H</sub> , Hz)                   | Cage       | CH <sup>1,6</sup>                | 7.81 s                        | 8.10 s                 | 8.05 s                          | 8.17 s<br>[8.01 s]                               | 7.93 s<br>[8.10 s]                               |
|                                                             |            | CH <sup>2,3</sup>                | 6.88 d (7)                    | 7.14 bs<br>7.43 bs     | 7.07 d (7)                      | 7.30 d (8)<br>[7.03 (8)]                         | 6.82 s<br>[7.13 s]                               |
|                                                             |            | CH <sup>4,5</sup>                | 6.56 bs                       | 8.02 bs<br>8.24 bs     | 6.87 d (8)                      | 8.25 d (8)<br>[7.81 d (8)]                       |                                                  |
|                                                             | Units      | N <sup>5</sup> -H                | 5.96 bs                       |                        |                                 | –                                                |                                                  |
|                                                             |            | N <sup>5</sup> -CH <sub>2</sub>  |                               | –                      | 5.49 s                          |                                                  | –                                                |
|                                                             |            |                                  |                               |                        |                                 |                                                  |                                                  |
| <sup>13</sup> C{ <sup>1</sup> H}<br>(J <sub>C,F</sub> , Hz) | Cage       | C <sup>1,6</sup>                 | 72.7                          | 72.6                   | 72.9                            | 74.9                                             |                                                  |
|                                                             |            | C <sup>2,3</sup>                 | 72.5                          | 73.9<br>74.6           | 73.2                            | 75.2                                             | 73.6                                             |
|                                                             |            | C <sup>4,5</sup>                 | 71.6                          | 60.3<br>72.6           | 77.2                            | 72.2                                             |                                                  |
|                                                             |            | CN                               | 111.1                         | 110.2                  | 110.4                           | 111.4                                            | 111.2                                            |
|                                                             | Units      | N <sup>5</sup> -CH <sub>2</sub>  |                               |                        | 53.2                            |                                                  |                                                  |
|                                                             |            | C(NO <sub>2</sub> ) <sub>3</sub> |                               | –                      | 126.3                           |                                                  | –                                                |
| <sup>14</sup> N<br>(ΔV <sub>1/2</sub> , Hz)                 | Cage       | NNO <sub>2</sub> 7–10,11         | 7,8 –38 (75)<br>9,10 –40 (72) | –42 (79)               | 7,8 –41 (126)<br>9,10 –39 (130) | –42 (156)                                        | –24 (416)                                        |
|                                                             | Units      | CNO <sub>2</sub>                 |                               | –                      | –31 (43)                        |                                                  | –                                                |

**Table 3** Assigned  $^{15}\text{N}\{^1\text{H}\}$  NMR shifts [ppm] of **5**, **6**, **15**, **22** and **23** in acetone- $\text{d}_6$  or DMSO- $\text{d}_6$ .

| Assignment |                                                                 | Compounds                      |                  |        |        |        |
|------------|-----------------------------------------------------------------|--------------------------------|------------------|--------|--------|--------|
|            |                                                                 | Chemical shifts $\delta$ , ppm |                  |        |        |        |
| Part       | Groups                                                          | 5                              | 6                | 15     | 22     | 23     |
| Cage       | <b>N<sup>1,3</sup></b>                                          | −182.6                         | −185.8<br>−182.8 | −178.3 | −182.4 | −182.7 |
|            | <b>N<sup>4,6</sup></b>                                          | −177.6                         | −182.2<br>−181.9 | −181.4 | −180.1 |        |
|            | <b>N<sup>5</sup></b>                                            | n.o.*                          | −144.6           | n.o.*  | −199.3 | −328.6 |
|            | <b>N<sup>2</sup></b>                                            | −336.3                         | n.o.*            | −335.7 | −328.6 |        |
|            | <b>7,8</b>                                                      | −37.1                          | −41.6<br>−41.4   | −40.7  | −43.3  | −40.8  |
|            | <b>N-NO<sub>2</sub> 9,10</b>                                    | −39.9                          | −41.3<br>−41.0   | −38.5  | −41.3  |        |
|            | <b>12</b>                                                       |                                | –                |        | −41.0  | –      |
| Units      | <b>CN<sup>11</sup></b>                                          | −172.0                         | −170.5           | −170.5 | −171.1 | −171.6 |
|            | <b>CH<sub>2</sub>C(N<sup>12</sup>O<sub>2</sub>)<sub>3</sub></b> | –                              |                  | −30.7  |        | –      |
|            | <b>N<sup>5</sup>-N<sup>12</sup>O</b>                            | –                              | 172.8            |        | –      |        |

\* Probably, due to the splitting on  $^1\text{H}$  and  $^{14}\text{N}$ , the signal of this  $^{15}\text{N}$  are very broadened, its intensity is highly reduced, the signal did not observed between a "noise" although the measurements were performed in different modes with elongated pulse delays throughout the night.

**Table 4** Assigned IR vibrations [ $\text{cm}^{-1}$ ] of isowurtzitanes **4**, **5**, **6**, **8**, **10**, **12**, **14**, **15**, **20–23** in KBr.

| Assignment           | Compounds                                      |         |               |               |                 |                              |                               |          |         |                        |
|----------------------|------------------------------------------------|---------|---------------|---------------|-----------------|------------------------------|-------------------------------|----------|---------|------------------------|
|                      | Vibration frequencies $\nu$ , $\text{cm}^{-1}$ |         |               |               |                 |                              |                               |          |         |                        |
|                      | Substrates                                     |         | Amides        |               |                 |                              |                               | Nitriles |         |                        |
|                      | 7                                              | 12      | 4             | 10            | 14              | 20                           | 21                            | 5        | 6       | 15 22 23               |
| as N-NO <sub>2</sub> | 1604 vs                                        | 1596 vs | 1587 vs       | 1604 vs       |                 | 1615 vs                      | 1611 vs                       | 1595 vs  | 1606 vs | 1633 vs 1616 vs        |
|                      |                                                |         |               |               |                 | 1594 vs                      |                               |          |         | 1593 vs 1599 s         |
|                      | 1558 vs                                        | 1561 s  | 1548 vs       | 1555 s        | 1596 b vs       | 1571 vs                      | 1557 vs                       | 1555 s   | 1565 vs | 1571 vs 1565 vs        |
| as C-NO <sub>2</sub> | –                                              | 1609 vs | –             |               |                 |                              | –                             | –        |         | –                      |
| s N-NO <sub>2</sub>  | 1330 vs                                        | 1327 vs | 1324 vs       | 1325 s        |                 | 1332 vs                      | 1323 vs                       | 1328 vs  | 1326 s  | 1329 vs 1349 s 1330 vs |
|                      | 1289 vs                                        | 1286 vs | 1288 vs       | 1290 vs       | 1292 b s        | 1295 vs                      | 1288 vs                       | 1292 vs  | 1289 vs | 1292 vs 1298 vs        |
|                      | 1266 vs                                        | 1270 vs | 1265 vs       | 1266 vs       | 1266 s          | 1269 vs                      | 1263 vs                       | 1269 vs  | 1267 vs | 1268 s 1258 vs 1264 vs |
| CH                   | 3037 m                                         | 3042 m  | 3044 m        | 3039 w        | 3042 w          | 3041 vs                      | 3040 s                        | 3038 m   | 3035 w  | 3040 w 3042 s 3031 vs  |
| CN                   | –                                              |         |               |               | –               |                              |                               | 2243 s   | 2247 m  | 2247 m 2248 s 2246 vs  |
| C=O                  | –                                              |         | 1708 s        | 1708 vs       | 1707 vs         | 1714 vs 1687 vs              | 1678 b vs                     |          |         |                        |
| NH <sub>2</sub>      | –                                              |         | 3460 m 3310 m | 3468 s 3324 s | 3486 vs 3419 vs | 3487 vs 3449 s 3400 s 3355 m | 3426 vs 3320 vs 3268 s 3205 s |          | –       |                        |
| NH                   | 3366 m 3401 m                                  | –       | 3218 m        |               | –               |                              |                               | 3388 m   |         | –                      |

General formula of the substrates 4-R-2,6,8,12-tetranitroisowutzitanes **8** and **12**

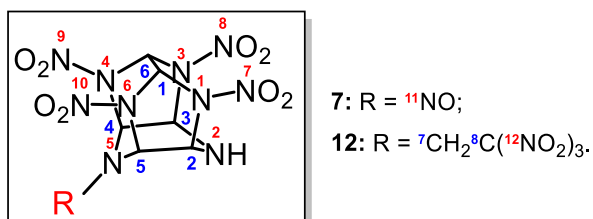

**Table 5** Assigned <sup>1</sup>H, <sup>13</sup>C{<sup>1</sup>H}, and <sup>14</sup>N NMR shifts [ppm] of **8** and **12** in acetone-d<sub>6</sub>.

| Nucleus                                   | Assignment                                                  |                                 | Compounds                         |                                              |                              |
|-------------------------------------------|-------------------------------------------------------------|---------------------------------|-----------------------------------|----------------------------------------------|------------------------------|
|                                           | Part                                                        | Groups                          | Chemical shifts $\delta$ , ppm    |                                              |                              |
|                                           |                                                             |                                 | 8                                 | 12                                           |                              |
| Solvent                                   |                                                             | Acetone-d <sub>6</sub>          | Acetone-d <sub>6</sub>            |                                              |                              |
| <sup>1</sup> H<br>(J <sub>H,H</sub> , Hz) | Cage                                                        | CH <sup>1,6</sup>               | 7.85 d (6)                        | 7.71 s                                       |                              |
|                                           |                                                             | CH <sup>2,3</sup>               | 6.49 d (8)<br>6.80 d (8)          | 6.34 d (3)<br>6.36 d (3)                     |                              |
|                                           |                                                             | CH <sup>4,5</sup>               | 7.84 dd (16, 2)<br>7.96 dd (8, 2) | 6.60 d (7)                                   |                              |
|                                           | Units                                                       | N <sup>5</sup> –H               | 5.92 bs                           | 5.69 bs                                      |                              |
|                                           |                                                             | N <sup>5</sup> –CH <sub>2</sub> | –                                 | 5.46 s                                       |                              |
|                                           | <sup>13</sup> C{ <sup>1</sup> H}<br>(J <sub>C,F</sub> , Hz) | Cage                            | C <sup>1,6</sup>                  | 74.3<br>74.5<br>72.7<br>72.8<br>73.9<br>74.0 | 73.5<br><br><br>73.0<br>72.9 |
| C <sup>2,3</sup>                          |                                                             |                                 | 60.9<br>73.0                      | 77.7                                         |                              |
| C <sup>4,5</sup>                          |                                                             |                                 |                                   |                                              |                              |
| N <sup>5</sup> –CH <sub>2</sub>           |                                                             |                                 | –                                 | 55.7                                         |                              |
| C(NO <sub>2</sub> ) <sub>3</sub>          |                                                             |                                 |                                   | 128.0                                        |                              |
| Cage                                      |                                                             | NNO <sub>2</sub>                | 7,8<br>9,10                       | –40 (61)<br>–37 (59)                         | –37 (80)                     |
|                                           |                                                             | Units                           | CNO <sub>2</sub>                  | –                                            | –30 (33)                     |

## Description of the spectra of 4-carbomoyl-polynitro hexaazaisowurtzitanes **4**, **10**, **14**, **20**, **21** and 4-cyano-polynitro hexaazaisowurtzitanes **5**, **6**, **15**, **22**, **23**

As can be seen in table 4 the IR spectra of the carboxamides and the nitriles show the characteristic absorption bands of the C=O at  $\nu \sim 1714$  to  $1678\text{ cm}^{-1}$  and the band of the CN at  $\nu \sim 2248$  to  $2243\text{ cm}^{-1}$ , respectively. The bands corresponding to the asymmetrical vibrations of the NO<sub>2</sub> for the carboxamides are located at  $\nu \sim 1615$  to  $1548\text{ cm}^{-1}$ , and for the nitriles are located at  $\nu \sim 1633$  to  $1555\text{ cm}^{-1}$ , whereas the bands of the symmetrical vibrations of the NO<sub>2</sub> for the carboxamides are located at  $\nu \sim 1332$  to  $1263\text{ cm}^{-1}$ , and for the nitriles are located at  $\nu \sim 1349$  to  $1258\text{ cm}^{-1}$ , respectively. The band of the CH units of the hexaazaisowurtzitane cage for the carboxamides appears at  $\nu \sim 3044$  to  $3039\text{ cm}^{-1}$  and for the nitriles appears at  $\nu \sim 3042$  to  $3031\text{ cm}^{-1}$ , respectively. Additionally, in the IR spectra of the carboxamides there are pairs of bands of the NH<sub>2</sub> at  $\nu \sim 3487$ – $3320$  and  $3400$ – $3205\text{ cm}^{-1}$ , while in the IR spectra of amines **4** and **5**, the band of the NH is observed at  $\nu \sim 3218$ – $3388\text{ cm}^{-1}$ , respectively.

According to tables 1 and 2 the resonance peaks of the CH units of the carboxamides and of the nitriles are observed in the range  $\delta_{\text{H}}$  6.2–8.0 ppm and  $\delta_{\text{H}}$  6.6–8.3 ppm in the <sup>1</sup>H NMR, as well as in the range  $\delta_{\text{C}}$  61.1–78.0 ppm and  $\delta_{\text{C}}$  60.3–77.2 ppm in the <sup>13</sup>C NMR, respectively. The spectra of the carboxamides contain the signals of the carbamoyl group, namely, the broadened peak of the NH<sub>2</sub> protons at high field with  $\delta_{\text{H}}$  6.5 and 7.1 ppm in the <sup>1</sup>H NMR, the peak from the carbon atom of the C=O at  $\delta_{\text{C}}$  154.2–155.3 ppm in the <sup>13</sup>C NMR. In the <sup>13</sup>C NMR spectra of the nitriles there is the signal of the CN group at  $\delta_{\text{C}}$  110.2–111.4 ppm. The signals of the protons of the cage secondary amino groups in the <sup>1</sup>H NMR of amide **4** and cyanide **5** are broadened and observed at high field with  $\delta_{\text{H}}$  5.71 and 5.96 ppm, respectively. In addition, in the spectra of **14** and **15** there are the signals of the trinitroethyl moiety, namely, the peak from CH<sub>2</sub> unit at  $\delta_{\text{H}}$   $\sim$ 5.5 ppm in the <sup>1</sup>H NMR and at  $\delta_{\text{C}}$  55.4 and 53.2 ppm, respectively, in the <sup>13</sup>C NMR, as well as a strongly broadened peak from C(NO<sub>2</sub>)<sub>3</sub> at  $\delta_{\text{C}}$  126.8 ppm. It should be noted that in the <sup>1</sup>H, <sup>13</sup>C NMR spectra of compounds **6** and **10** there are some splitting due to synperiplanar (*sp\_ts*) or anti-periplanar (*ap\_ts*) conformation of NO bond with respect to the nitrogen lone pair.

The <sup>14</sup>N NMR spectra of the new compounds show the signals from the *N*-nitro groups of the polynitro hexaazaisowurtzitane cage at  $\delta_{\text{N}}$  –40 to –36 ppm ( $\Delta\nu_{1/2}$  100–365 Hz) and at  $\delta_{\text{N}}$  –42 to –24 ppm ( $\Delta\nu_{1/2}$  72–416 Hz) for the carboxamides and the nitriles, respectively. The <sup>14</sup>N NMR spectra of **14** and **15** containing the C(NO<sub>2</sub>)<sub>3</sub> unit shows the additional sharp peak of the C-nitro group at  $\delta_{\text{N}}$  –31 ppm ( $\Delta\nu_{1/2} \sim 40\text{ Hz}$ ).

The <sup>15</sup>N NMR spectra of the target *N*-cyano HAIWs **5**, **6**, **15**, **22**, **23** were recorded in acetone-*d*<sub>6</sub> (or DMSO-*d*<sub>6</sub>) and the results are summarized in Table 3 for comparison. The signals of the nitro (niroso) groups are observed at the lowest field in the range  $\delta_{\text{N}}$  –43 to –30 ppm (173 ppm). The signal for the nitrogen atom of the cyano group appear in the middle field of the spectra at  $\delta_{\text{N}}$  –172 to –170 ppm. The signals of the nitrogen atoms of the five-membered cage rings are also found in the middle area at the range between  $\delta_{\text{N}}$  –186 and –177 ppm. The peak of the nitrogen atom of the six-membered cage ring, which is linked to the CN group, appears in the highest field at  $\delta_{\text{N}}$  –336 to –329 ppm, while the opposite nitrogen atom of the six-membered cage ring, appears in various fields depending on the substituent over a wide range  $\delta_{\text{N}}$  –329 to –145 ppm. In the <sup>15</sup>N NMR spectra of **5**, **6** and **15**, some low-intensity peaks from the nitrogen atoms of the six-membered cage ring did not appear, which is not uncommon, and is probably due to the fact that these <sup>15</sup>N are split and very broadened, their intensity is highly reduced, these signals are not observed among the “noise”, although the measurements were performed in different modes with elongated pulse delays throughout the night.

## 1) Single crystal X-ray diffraction of compound 5

X-ray diffraction data **5** were collected at 100K on a four-circle Rigaku Synergy S diffractometer equipped with a HyPix6000HE area-detector (kappa geometry, shutterless  $\omega$ -scan technique), using graphite monochromatized Cu K $\alpha$ -radiation ( $\lambda = 1.54184$  Å). The intensity data were integrated and corrected for absorption and decay by the CrysAlisPro program.<sup>32</sup> The structure was solved by direct methods using SHELXT<sup>33</sup> and refined on  $F^2$  using SHELXL-2018<sup>34</sup> in the OLEX2 program.<sup>35</sup> All non-hydrogen atoms were refined with individual anisotropic displacement parameters. The location of hydrogen atom H6 was found from the electron density-difference map; this hydrogen atom was refined with individual isotropic displacement parameters. All other hydrogen atoms were placed in ideal calculated positions and refined as riding atoms with relative isotropic displacement parameters. The Mercury program suite<sup>36]</sup> was used for molecular graphics. Detailed crystallographic information is provided in Tables 5–8, and structure are presented in Figures 1 and 2. Full crystallographic data have been deposited with the Cambridge Crystallographic Data Center, CCDC 2308196. Copies of the data can be obtained free of charge *via* <https://www.ccdc.cam.ac.uk/structures/>

**Table 6.** Detail Crystallographic data of compounds **5** according to single crystal X-ray diffraction analysis.

|                                                                                                              |                                                                                                                                          |
|--------------------------------------------------------------------------------------------------------------|------------------------------------------------------------------------------------------------------------------------------------------|
| Formula                                                                                                      | C <sub>7</sub> H <sub>7</sub> N <sub>11</sub> O <sub>8</sub>                                                                             |
| Formula weight [g·mol <sup>-1</sup> ]                                                                        | 373.24                                                                                                                                   |
| Crystal system                                                                                               | monoclinic                                                                                                                               |
| Space group                                                                                                  | <i>P</i> 2 <sub>1</sub> /n                                                                                                               |
| Unit cell dimensions                                                                                         | <i>a</i> = 7.67654(7) Å, $\alpha$ = 90°<br><i>b</i> = 15.58666(16) Å, $\beta$ = 96.3532(9)°<br><i>c</i> = 10.82025(11) Å, $\gamma$ = 90° |
| <i>V</i> [Å <sup>3</sup> ]                                                                                   | 1286.71(2)                                                                                                                               |
| <i>Z</i> / <i>Z'</i>                                                                                         | 4 / 1                                                                                                                                    |
| $\rho_{\text{calc}}$ [g·cm <sup>-3</sup> ]                                                                   | 1.927                                                                                                                                    |
| $\mu$ [mm <sup>-1</sup> ]                                                                                    | 1.545                                                                                                                                    |
| <i>F</i> (000)                                                                                               | 760                                                                                                                                      |
| crystal colour                                                                                               | colorless                                                                                                                                |
| crystal size [mm <sup>3</sup> ]                                                                              | 0.15 × 0.09 × 0.04                                                                                                                       |
| $\theta$ range [°]                                                                                           | 4.996 to 79.670                                                                                                                          |
| Index ranges                                                                                                 | −8 ≤ <i>h</i> ≤ 9, −19 ≤ <i>k</i> ≤ 19, −13 ≤ <i>l</i> ≤ 13                                                                              |
| Reflections measured                                                                                         | 17390                                                                                                                                    |
| Independent reflections                                                                                      | 2779 [R(int) = 0.0220]                                                                                                                   |
| Restraints applied/parameters refined                                                                        | 0 / 239                                                                                                                                  |
| Goodness-of-fit on $F^2$                                                                                     | 1.031                                                                                                                                    |
| Reflections with <i>I</i> > 2 $\sigma$ ( <i>I</i> )                                                          | 2660                                                                                                                                     |
| Final <i>R</i> indices [ <i>I</i> ≥ 2 $\sigma$ ( <i>I</i> )]                                                 | <i>R</i> <sub>1</sub> = 0.0303, <i>wR</i> <sub>2</sub> = 0.0769                                                                          |
| Final <i>R</i> indices [all data]                                                                            | <i>R</i> <sub>1</sub> = 0.0315, <i>wR</i> <sub>2</sub> = 0.0779                                                                          |
| Residual electron density ( $\rho_{\text{max}}/\rho_{\text{min}}$ ) [e Å <sup>-3</sup> / e Å <sup>-3</sup> ] | 0.330 / -0.250                                                                                                                           |
| CCDC number                                                                                                  | 2308196                                                                                                                                  |



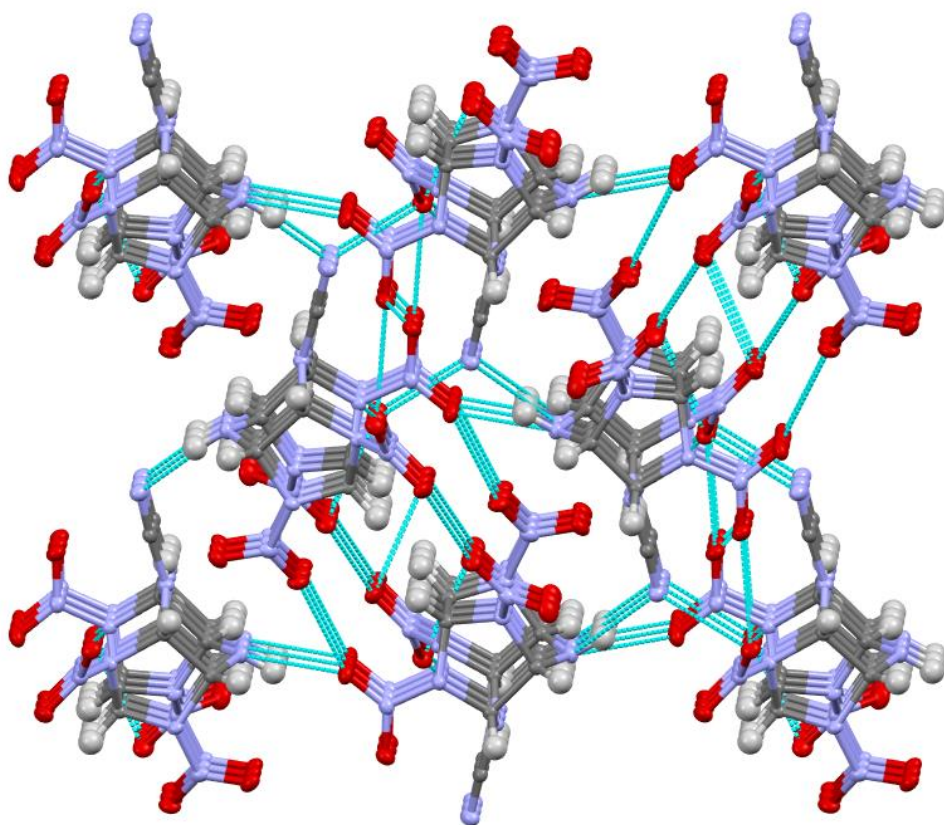

**Figure 2.** Supramolecular structure in the crystal **5** formed by the classical H-bond interactions, (a) and general view along axis *a* to the crystal packing (b) formed by the classical H-bond interactions, N $\cdots$ O and O $\cdots$ O interactions.

**Table 7** Selected bond lengths (Å), bond angles (°) and torsion angles (°) of compound **5**

| <b>Bond lengths</b>      |            |
|--------------------------|------------|
| <i>Cage nitro groups</i> |            |
| N(1)–N(7)                | 1.4301(13) |
| N(2)–N(8)                | 1.3669(14) |
| N(3)–N(9)                | 1.3756(14) |
| N(4)–N(10)               | 1.3950(14) |
| <i>Cyano group</i>       |            |
| N(5)–C(7)                | 1.3397(15) |
| N(11)–C(7)               | 1.1499(17) |

**Table 7** (continued)

| <b>Bond angles</b>                        |             |
|-------------------------------------------|-------------|
| <i>Cage nitro groups</i>                  |             |
| N(7)–N(1)–C(1)                            | 114.68(9)   |
| N(7)–N(1)–C(3)                            | 115.70(9)   |
| N(8)–N(2)–C(1)                            | 119.04(9)   |
| N(8)–N(2)–C(4)                            | 119.36(10)  |
| N(9)–N(3)–C(2)                            | 119.83(10)  |
| N(9)–N(3)–C(5)                            | 120.79(10)  |
| N(10)–N(4)–C(2)                           | 117.60(10)  |
| N(10)–N(4)–C(6)                           | 120.10(9)   |
| <i>Cyano group</i>                        |             |
| C(7)–N(5)–C(3)                            | 117.75(10)  |
| C(7)–N(5)–C(5)                            | 121.32(10)  |
| <b>Torsion angles</b>                     |             |
| <i>Cage nitro groups</i>                  |             |
| N(7)–N(1)–C(3)–C(4) ( <i>axial</i> )      | -110.83(10) |
| N(8)–N(2)–C(4)–C(3) ( <i>equatorial</i> ) | -173.10(9)  |
| N(9)–N(3)–C(5)–C(6) ( <i>equatorial</i> ) | -176.54(9)  |
| N(10)–N(4)–C(6)–C(5) ( <i>axial</i> )     | -119.03(11) |
| <i>Cyano group</i>                        |             |
| C(7)–N(5)–C(3)–(C4) ( <i>middle</i> )     | 149.10(10)  |
| C(7)–N(5)–C(5)–C(6) ( <i>middle</i> )     | -152.34(10) |

**Table 8** Intermolecular hydrogen bonds for **5** [Å and °].

| D–H···A           | D–H, Å    | H···A, Å  | D···A, Å   | ∠ DHA, °  | symmetry operation  |
|-------------------|-----------|-----------|------------|-----------|---------------------|
| N(6)–H(6)···O(6)  | 0.870(18) | 2.312(18) | 2.8605(14) | 121.1(13) | -x+1/2,y-1/2,-z+3/2 |
| N(6)–H(6)···N(11) | 0.870(18) | 2.254(18) | 3.0351(15) | 149.4(15) | x+1/2,-y+1/2,z+1/2  |

## 2) Single crystal X-ray diffraction of compound 15

X-ray diffraction data **15** were collected at 100K on a four-circle Rigaku Synergy S diffractometer equipped with a HyPix6000HE area-detector (kappa geometry, shutterless  $\omega$ -scan technique), using graphite monochromatized Cu K $\alpha$ -radiation ( $\lambda = 1.54184$  Å). The intensity data were integrated and corrected for absorption and decay by the CrysAlisPro program.<sup>32</sup> The structure was solved by direct methods using SHELXT<sup>33</sup> and refined on  $F^2$  using SHELXL-2018<sup>34</sup> in the OLEX2 program.<sup>35</sup> All non-hydrogen atoms were refined with individual anisotropic displacement parameters. All hydrogen atoms were placed in ideal calculated positions and refined as riding atoms with relative isotropic displacement parameters. The Mercury program suite<sup>36</sup> was used for molecular graphics. Detailed crystallographic information is provided in Tables 9 and 10, and structure are presented in Figures 3 and 4. Full crystallographic data have been deposited with the Cambridge Crystallographic Data Center, CCDC 2308197. Copies of the data can be obtained free of charge via <https://www.ccdc.cam.ac.uk/structures/>

**Table 9.** Detail Crystallographic data of compounds **15** according to single crystal X-ray diffraction analysis.

|                                                                                                              |                                                                                                                                     |
|--------------------------------------------------------------------------------------------------------------|-------------------------------------------------------------------------------------------------------------------------------------|
| Formula                                                                                                      | C <sub>9</sub> H <sub>8</sub> N <sub>14</sub> O <sub>14</sub>                                                                       |
| Formula weight [g·mol <sup>-1</sup> ]                                                                        | 536.29                                                                                                                              |
| Crystal system                                                                                               | monoclinic                                                                                                                          |
| Space group                                                                                                  | $P 2_1/n$                                                                                                                           |
| Unit cell dimensions                                                                                         | $a = 13.5629(4)$ Å, $\alpha = 90^\circ$<br>$b = 8.4701(3)$ Å, $\beta = 109.891(3)^\circ$<br>$c = 17.2484(5)$ Å, $\gamma = 90^\circ$ |
| $V$ [Å <sup>3</sup> ]                                                                                        | 1863.27(11)                                                                                                                         |
| $Z / Z'$                                                                                                     | 4 / 1                                                                                                                               |
| $\rho_{\text{calc}}$ [g·cm <sup>-3</sup> ]                                                                   | 1.912                                                                                                                               |
| $\mu$ [mm <sup>-1</sup> ]                                                                                    | 1.608                                                                                                                               |
| $F(000)$                                                                                                     | 1088                                                                                                                                |
| crystal colour                                                                                               | colorless                                                                                                                           |
| crystal size [mm <sup>3</sup> ]                                                                              | 0.11 × 0.06 × 0.02                                                                                                                  |
| $\theta$ range [°]                                                                                           | 3.465 to 83.954                                                                                                                     |
| Index ranges                                                                                                 | $-17 \leq h \leq 16$ , $-10 \leq k \leq 10$ , $-21 \leq l \leq 21$                                                                  |
| Reflections measured                                                                                         | 23475                                                                                                                               |
| Independent reflections                                                                                      | 4051 [R(int) = 0.0416]                                                                                                              |
| Restraints applied/parameters refined                                                                        | 0 / 334                                                                                                                             |
| Goodness-of-fit on $F^2$                                                                                     | 1.077                                                                                                                               |
| Reflections with $I > 2\sigma(I)$                                                                            | 3523                                                                                                                                |
| Final $R$ indices [ $I \geq 2\sigma(I)$ ]                                                                    | $R_1 = 0.0374$ , $wR_2 = 0.0902$                                                                                                    |
| Final $R$ indices [all data]                                                                                 | $R_1 = 0.0446$ , $wR_2 = 0.1002$                                                                                                    |
| Residual electron density ( $\rho_{\text{max}}/\rho_{\text{min}}$ ) [e Å <sup>-3</sup> / e Å <sup>-3</sup> ] | 0.353 / -0.363                                                                                                                      |
| CCDC number                                                                                                  | 2308197                                                                                                                             |

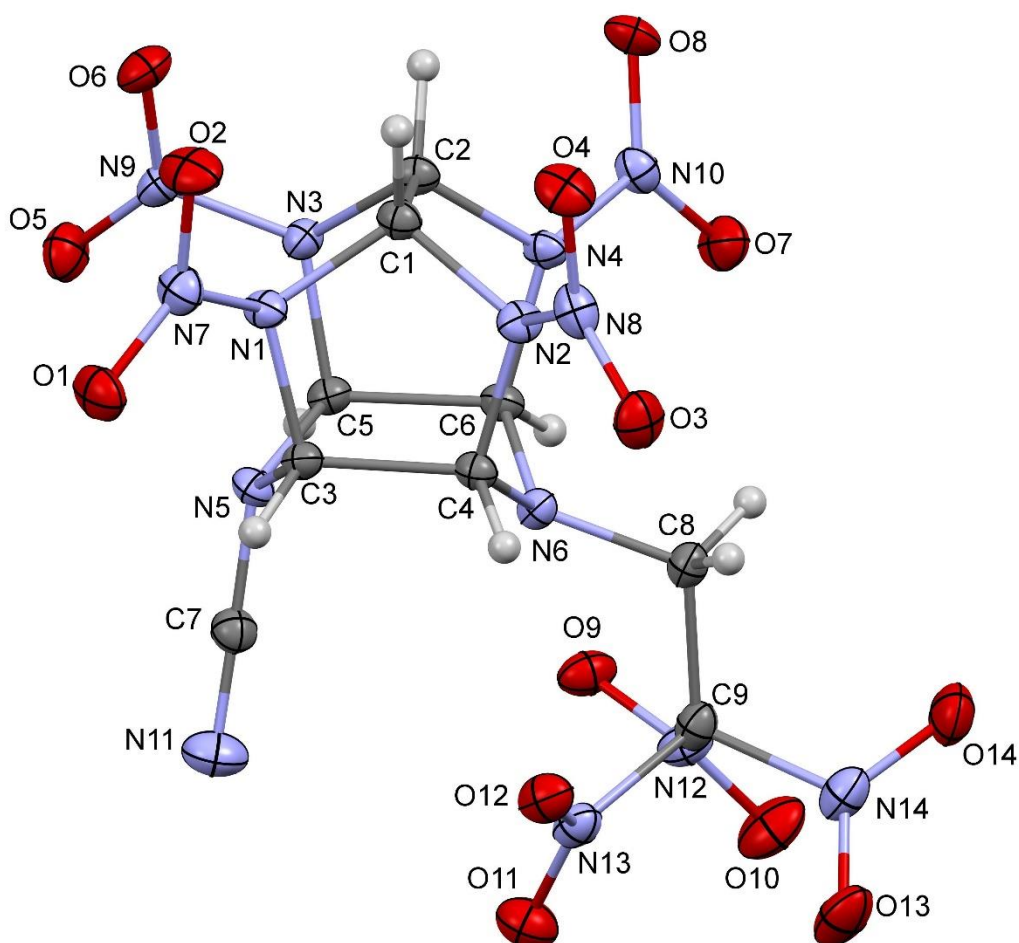

**Figures 3.** General view of molecule **15** in crystal. Anisotropic displacement parameters are drawn at 50% probability level.

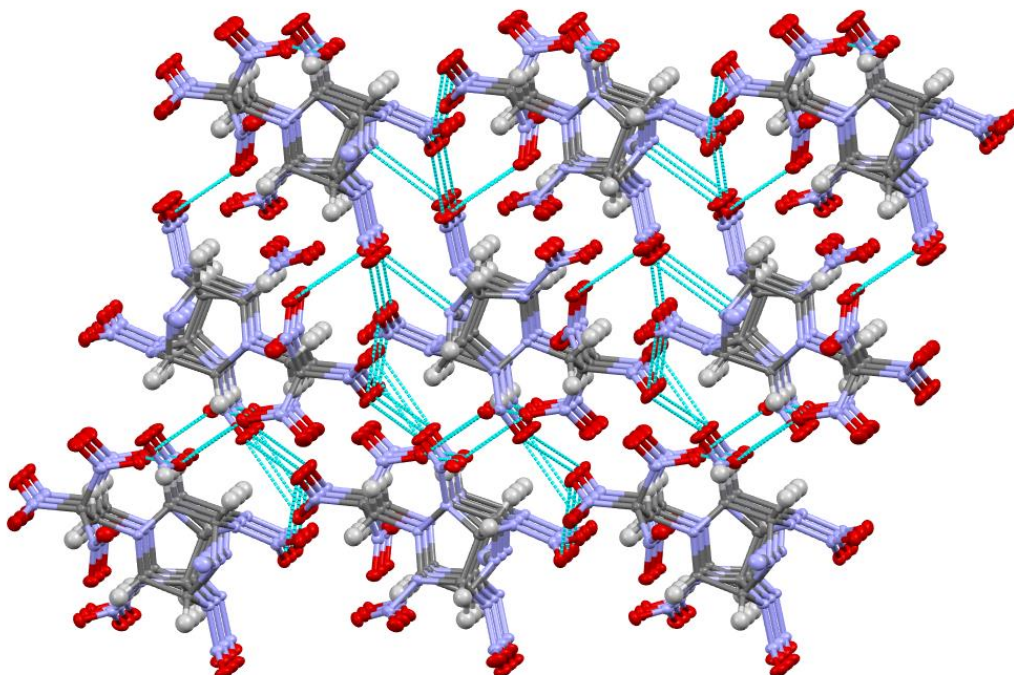

**Figures 4.** General view along axis *b* to the crystal packing for **15**, formed mainly by N $\cdots$ O and O $\cdots$ O interactions.

**Table 10.** Selected bond lengths (Å), bond angles (°) and torsion angles (°) of compound **15**

| <b>Bond lengths</b>                        |  |             |
|--------------------------------------------|--|-------------|
| <i>Cage nitro groups</i>                   |  |             |
| N(1)–N(7)                                  |  | 1.428(2)    |
| N(2)–N(8)                                  |  | 1.4078(19)  |
| N(3)–N(9)                                  |  | 1.381(2)    |
| N(4)–N(10)                                 |  | 1.389(2)    |
| <i>Cyano group</i>                         |  |             |
| N(5)–C(7)                                  |  | 1.345(2)    |
| N(11)–C(7)                                 |  | 1.145(3)    |
| <i>Trinitroethyl moiety</i>                |  |             |
| N(6)–C(8)                                  |  | 1.456(2)    |
| C(8)–C(9)                                  |  | 1.537(3)    |
| C(9)–N(12)                                 |  | 1.528(2)    |
| C(9)–N(13)                                 |  | 1.526(2)    |
| C(9)–N(14)                                 |  | 1.523(2)    |
| <b>Bond angles</b>                         |  |             |
| <i>Cage nitro groups</i>                   |  |             |
| N(7)–N(1)–C(1)                             |  | 116.81(14)  |
| N(7)–N(1)–C(3)                             |  | 116.73(14)  |
| N(8)–N(2)–C(1)                             |  | 116.26(14)  |
| N(8)–N(2)–C(4)                             |  | 117.38(14)  |
| N(9)–N(3)–C(2)                             |  | 119.53(14)  |
| N(9)–N(3)–C(5)                             |  | 120.48(14)  |
| N(10)–N(4)–C(2)                            |  | 118.12(14)  |
| N(10)–N(4)–C(6)                            |  | 118.54(13)  |
| <i>Cyano group</i>                         |  |             |
| C(7)–N(5)–C(3)                             |  | 113.89(14)  |
| C(7)–N(5)–C(5)                             |  | 116.99(14)  |
| <i>Trinitroethyl moiety</i>                |  |             |
| N(6)–C(8)–C(9)                             |  | 112.19(14)  |
| C(8)–C(9)–N(12)                            |  | 114.50(14)  |
| C(8)–C(9)–N(13)                            |  | 113.62(14)  |
| C(8)–C(9)–N(14)                            |  | 110.06(15)  |
| <b>Torsion angles</b>                      |  |             |
| <i>Cage nitro groups</i>                   |  |             |
| N(7)–N(1)–C(3)–C(4) ( <i>axial</i> )       |  | -115.10(15) |
| N(8)–N(2)–C(4)–C(3) ( <i>axial</i> )       |  | 111.47(15)  |
| N(9)–N(3)–C(5)–C(6) ( <i>equatorial</i> )  |  | -174.95(13) |
| N(10)–N(4)–C(6)–C(5) ( <i>axial</i> )      |  | -117.70(15) |
| <i>Cyano group</i>                         |  |             |
| C(7)–N(5)–C(3)–C(4) ( <i>axial</i> )       |  | 86.23(18)   |
| C(7)–N(5)–C(5)–C(6) ( <i>axial</i> )       |  | -86.40(18)  |
| <i>Trinitroethyl moiety</i>                |  |             |
| C(3)–C(4)–N(6)–C(8) ( <i>equatorial</i> )  |  | -162.42(14) |
| C(5)–C(6)–N(4)–C(10) ( <i>equatorial</i> ) |  | 160.98(14)  |

### 3) Single crystal X-ray diffraction of compound **22**

X-ray diffraction data **22** as solvate **22**·MeCN were collected at 100K on a four-circle Rigaku Synergy S diffractometer equipped with a HyPix6000HE area-detector (kappa geometry, shutterless  $\omega$ -scan technique), using graphite monochromatized Cu K $\alpha$ -radiation ( $\lambda = 1.54184$  Å). The intensity data were integrated and corrected for absorption and decay by the CrysAlisPro program.<sup>32</sup> The structure was solved by direct methods using SHELXT<sup>33</sup> and refined on  $F^2$  using SHELXL-2018<sup>34</sup> in the OLEX2 program.<sup>35</sup> All non-hydrogen atoms were refined with individual anisotropic displacement parameters. All hydrogen atoms were placed in ideal calculated positions and refined as riding atoms with relative isotropic displacement parameters. The Mercury program suite<sup>36</sup> was used for molecular graphics. Detailed crystallographic information is provided in Tables 11 and 12, and structure are presented in Figures 5 and 6. Full crystallographic data have been deposited with the Cambridge Crystallographic Data Center, CCDC 2308198. Copies of the data can be obtained free of charge *via* <https://www.ccdc.cam.ac.uk/structures/>

**Table 11.** Detail Crystallographic data of compounds **22** according to single crystal X-ray diffraction analysis.

|                                                                                                              |                                                                                                                             |
|--------------------------------------------------------------------------------------------------------------|-----------------------------------------------------------------------------------------------------------------------------|
| Formula                                                                                                      | C <sub>7</sub> H <sub>6</sub> N <sub>12</sub> O <sub>10</sub> ·CH <sub>3</sub> CN                                           |
| Formula weight [g·mol <sup>-1</sup> ]                                                                        | 459.29                                                                                                                      |
| Crystal system                                                                                               | monoclinic                                                                                                                  |
| Space group                                                                                                  | <i>P</i> na2 <sub>1</sub>                                                                                                   |
| Unit cell dimensions                                                                                         | $a = 13.5373(3)$ Å, $\alpha = 90^\circ$<br>$b = 7.8765(2)$ Å, $\beta = 90^\circ$<br>$c = 32.0668(8)$ Å, $\gamma = 90^\circ$ |
| $V$ [Å <sup>3</sup> ]                                                                                        | 3419.17(14)                                                                                                                 |
| $Z / Z'$                                                                                                     | 8 / 2                                                                                                                       |
| $\rho_{\text{calc}}$ [g·cm <sup>-3</sup> ]                                                                   | 1.784                                                                                                                       |
| $\mu$ [mm <sup>-1</sup> ]                                                                                    | 1.428                                                                                                                       |
| $F(000)$                                                                                                     | 1872                                                                                                                        |
| crystal colour                                                                                               | colorless                                                                                                                   |
| crystal size [mm <sup>3</sup> ]                                                                              | 0.17 × 0.09 × 0.04                                                                                                          |
| $\theta$ range [°]                                                                                           | 2.756 to 79.984                                                                                                             |
| Index ranges                                                                                                 | $-13 \leq h \leq 16$ , $-10 \leq k \leq 9$ , $-40 \leq l \leq 40$                                                           |
| Reflections measured                                                                                         | 41607                                                                                                                       |
| Independent reflections                                                                                      | 7144 [R(int) = 0.0357]                                                                                                      |
| Restraints applied/parameters refined                                                                        | 3 / 592                                                                                                                     |
| Goodness-of-fit on $F^2$                                                                                     | 1.091                                                                                                                       |
| Reflections with $I > 2\sigma(I)$                                                                            | 7081                                                                                                                        |
| Final $R$ indices [ $I \geq 2\sigma(I)$ ]                                                                    | $R_1 = 0.0554$ , $wR_2 = 0.1509$                                                                                            |
| Final $R$ indices [all data]                                                                                 | $R_1 = 0.0557$ , $wR_2 = 0.1511$                                                                                            |
| Residual electron density ( $\rho_{\text{max}}/\rho_{\text{min}}$ ) [e Å <sup>-3</sup> / e Å <sup>-3</sup> ] | 0.758 / -0.335                                                                                                              |
| CCDC number                                                                                                  | 2308198                                                                                                                     |



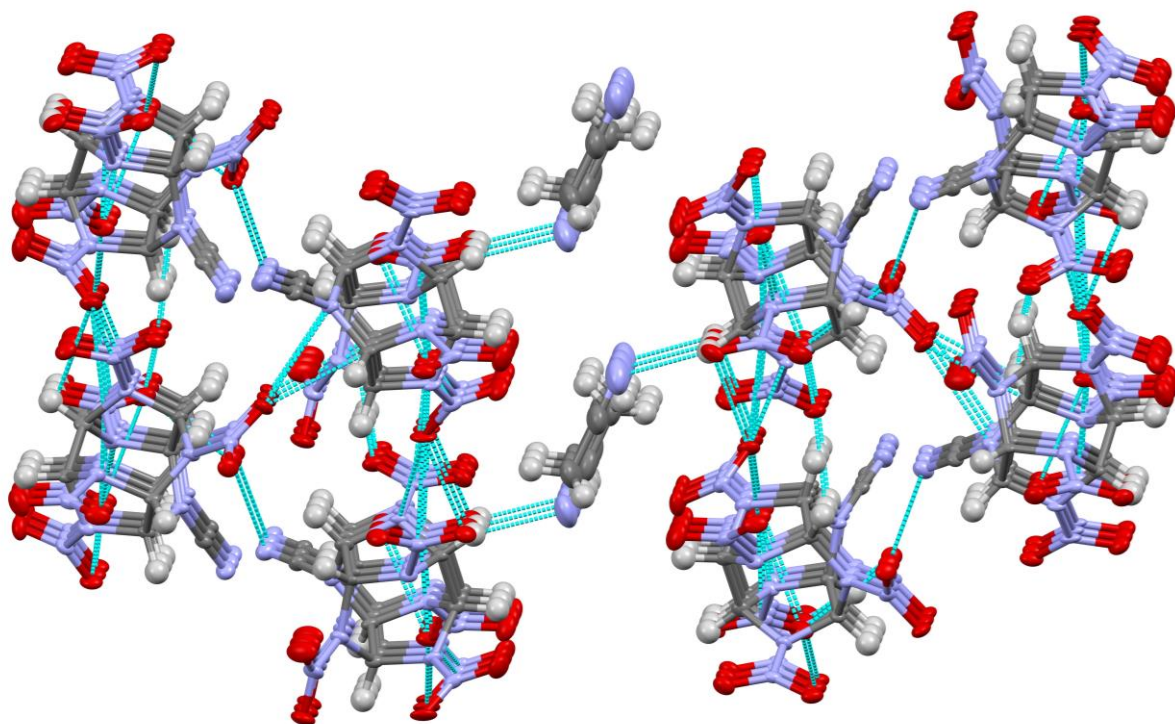

**Figure 6.** General view to the crystal packing for compound **22**·MeCN along the axis *b*, formed mainly by N···O and O···O interactions.

**Table 12.** Selected bond lengths (Å), bond angles (°) and torsion angles (°) of compound **22**

| <b>Bond lengths</b>                     |                     |
|-----------------------------------------|---------------------|
| <i>Cage nitro groups</i>                |                     |
| N(1A)–N(7A) / N(1B)–N(7B)               | 1.383(6) / 1.428(6) |
| N(2A)–N(8A) / N(2B)–N(8B)               | 1.445(6) / 1.391(6) |
| N(3A)–N(9A) / N(3B)–N(9B)               | 1.442(5) / 1.385(6) |
| N(4A)–N(10A) / N(4B)–N(10B)             | 1.376(6) / 1.437(6) |
| N(6A)–N(12A) / N(6B)–N(12B)             | 1.393(6) / 1.393(6) |
| <i>Cyano group</i>                      |                     |
| N(5A)–C(7A) / N(5B)–C(7B)               | 1.339(6) / 1.337(7) |
| N(11A)–C(7A) / N(11B)–C(7B)             | 1.159(7) / 1.152(7) |
| <b>Bond angles</b>                      |                     |
| <i>Cage nitro groups</i>                |                     |
| N(7A)–N(1A)–C(1A) / N(7B)–N(1B)–C(1B)   | 118.6(4) / 114.9(4) |
| N(7A)–N(1A)–C(3A) / N(7B)–N(1B)–C(3B)   | 119.1(4) / 114.5(4) |
| N(8A)–N(2A)–C(1A) / N(8B)–N(2B)–C(1B)   | 114.0(4) / 118.3(4) |
| N(8A)–N(2A)–C(4A) / N(8B)–N(2B)–C(4B)   | 113.6(4) / 120.5(4) |
| N(9A)–N(3A)–C(2A) / N(9B)–N(3B)–C(2B)   | 114.0(4) / 120.4(4) |
| N(9A)–N(3A)–C(5A) / N(9B)–N(3B)–C(5B)   | 115.9(4) / 119.6(4) |
| N(10A)–N(4A)–C(2A) / N(10B)–N(4B)–C(2B) | 121.0(4) / 114.1(4) |
| N(10A)–N(4A)–C(6A) / N(10B)–N(4B)–C(6B) | 119.7(4) / 115.8(4) |
| N(12A)–N(6A)–C(4A) / N(12B)–N(6B)–C(4B) | 118.9(4) / 120.3(4) |
| N(12A)–N(6A)–C(6A) / N(12B)–N(6B)–C(6B) | 121.2(4) / 117.9(4) |
| <i>Cyano group</i>                      |                     |
| C(7A)–N(5A)–C(3A) / C(7B)–N(5B)–C(3B)   | 118.5(4) / 121.1(4) |
| C(7A)–N(5A)–C(5A) / C(7B)–N(5B)–C(5B)   | 121.4(4) / 121.3(4) |

**Table 12** (continued)**Torsion angles***Cage nitro groups*

|                                                     |                                          |                       |
|-----------------------------------------------------|------------------------------------------|-----------------------|
| N(7A)–N(1A)–C(3A)–C(4A) / N(7B)–N(1B)–C(3B)–C(4B)   | ( <i>equatorial</i> ) / ( <i>axial</i> ) | 171.1(4) / 106.9(4)   |
| N(8A)–N(2A)–C(4A)–C(3A) / N(8B)–N(2B)–C(4B)–C(3B)   | ( <i>axial</i> ) / ( <i>equatorial</i> ) | 106.6(4) / -171.3(4)  |
| N(9A)–N(3A)–C(5A)–C(6A) / N(9B)–N(3B)–C(5B)–C(6B)   | ( <i>axial</i> ) / ( <i>equatorial</i> ) | 110.1(4) / -177.8(4)  |
| N(10A)–N(4A)–C(6A)–C(5A) / N(10A)–N(4A)–C(6B)–C(5B) | ( <i>equatorial</i> ) / ( <i>axial</i> ) | 175.6(4) / 110.7(4)   |
| N(12A)–N(6A)–C(4A)–C(3A) / N(12B)–N(6B)–C(4B)–C(3B) | ( <i>middle</i> ) / ( <i>middle</i> )    | -138.0(4) / -148.6(4) |
| N(12A)–N(6A)–C(6A)–C(5A) / N(12B)–N(6B)–C(6B)–C(5B) | ( <i>middle</i> ) / ( <i>middle</i> )    | 140.3(4) / 145.9(4)   |

*Cyano group*

|                                                   |                                       |                       |
|---------------------------------------------------|---------------------------------------|-----------------------|
| C(7A)–N(5A)–C(3A)–(C4A) / C(7B)–N(5B)–C(3B)–(C4B) | ( <i>middle</i> ) / ( <i>middle</i> ) | 145.7(4) / 138.4(5)   |
| C(7A)–N(5A)–C(5A)–C(6A) / C(7B)–N(5B)–C(5B)–C(6B) | ( <i>middle</i> ) / ( <i>middle</i> ) | -144.2(4) / -140.7(5) |

#### 4) Single crystal X-ray diffraction of compound 23

X-ray diffraction data **23** were collected at 100K on a four-circle Rigaku Synergy S diffractometer equipped with a HyPix6000HE area-detector (kappa geometry, shutterless  $\omega$ -scan technique), using graphite monochromatized Cu K $\alpha$ -radiation ( $\lambda = 1.54184$  Å). The intensity data were integrated and corrected for absorption and decay by the CrysAlisPro program.<sup>32</sup> The structure was solved by direct methods using SHELXT<sup>33</sup> and refined on  $F^2$  using SHELXL-2018<sup>34</sup> in the OLEX2 program.<sup>35</sup> All non-hydrogen atoms were refined with individual anisotropic displacement parameters. All hydrogen atoms were placed in ideal calculated positions and refined as riding atoms with relative isotropic displacement parameters. The Mercury program suite<sup>36</sup> was used for molecular graphics. Detailed crystallographic information is provided in Tables 13 and 14, and structure are presented in Figures 7 and 8. Full crystallographic data have been deposited with the Cambridge Crystallographic Data Center, CCDC 2308199. Copies of the data can be obtained free of charge via <https://www.ccdc.cam.ac.uk/structures/>

**Table 13.** Detail Crystallographic data of compounds **23** according to single crystal X-ray diffraction analysis.

|                                                                                                              |                                                                                                                                          |
|--------------------------------------------------------------------------------------------------------------|------------------------------------------------------------------------------------------------------------------------------------------|
| Formula                                                                                                      | C <sub>8</sub> H <sub>6</sub> N <sub>12</sub> O <sub>8</sub>                                                                             |
| Formula weight [g·mol <sup>-1</sup> ]                                                                        | 398.25                                                                                                                                   |
| Crystal system                                                                                               | monoclinic                                                                                                                               |
| Space group                                                                                                  | $P 2_1/c$                                                                                                                                |
| Unit cell dimensions                                                                                         | $a = 7.78897(7)$ Å, $\alpha = 90^\circ$<br>$b = 13.33467(14)$ Å, $\beta = 93.7723(8)^\circ$<br>$c = 13.43040(12)$ Å, $\gamma = 90^\circ$ |
| $V$ [Å <sup>3</sup> ]                                                                                        | 1391.90(2)                                                                                                                               |
| $Z / Z'$                                                                                                     | 4 / 1                                                                                                                                    |
| $\rho_{\text{calc}}$ [g·cm <sup>-3</sup> ]                                                                   | 1.900                                                                                                                                    |
| $\mu$ [mm <sup>-1</sup> ]                                                                                    | 1.503                                                                                                                                    |
| $F(000)$                                                                                                     | 808                                                                                                                                      |
| crystal colour                                                                                               | colorless                                                                                                                                |
| crystal size [mm <sup>3</sup> ]                                                                              | 0.24 × 0.05 × 0.04                                                                                                                       |
| $\theta$ range [°]                                                                                           | 4.678 to 77.708                                                                                                                          |
| Index ranges                                                                                                 | $-9 \leq h \leq 7$ , $-16 \leq k \leq 16$ , $-17 \leq l \leq 16$                                                                         |
| Reflections measured                                                                                         | 18672                                                                                                                                    |
| Independent reflections                                                                                      | 2957 [R(int) = 0.0277]                                                                                                                   |
| Restraints applied/parameters refined                                                                        | 0 / 253                                                                                                                                  |
| Goodness-of-fit on $F^2$                                                                                     | 1.042                                                                                                                                    |
| Reflections with $I > 2\sigma(I)$                                                                            | 2852                                                                                                                                     |
| Final $R$ indices [ $I \geq 2\sigma(I)$ ]                                                                    | $R_1 = 0.0310$ , $wR_2 = 0.0784$                                                                                                         |
| Final $R$ indices [all data]                                                                                 | $R_1 = 0.0317$ , $wR_2 = 0.0789$                                                                                                         |
| Residual electron density ( $\rho_{\text{max}}/\rho_{\text{min}}$ ) [e Å <sup>-3</sup> / e Å <sup>-3</sup> ] | 0.302 / -0.314                                                                                                                           |
| CCDC number                                                                                                  | 2308199                                                                                                                                  |

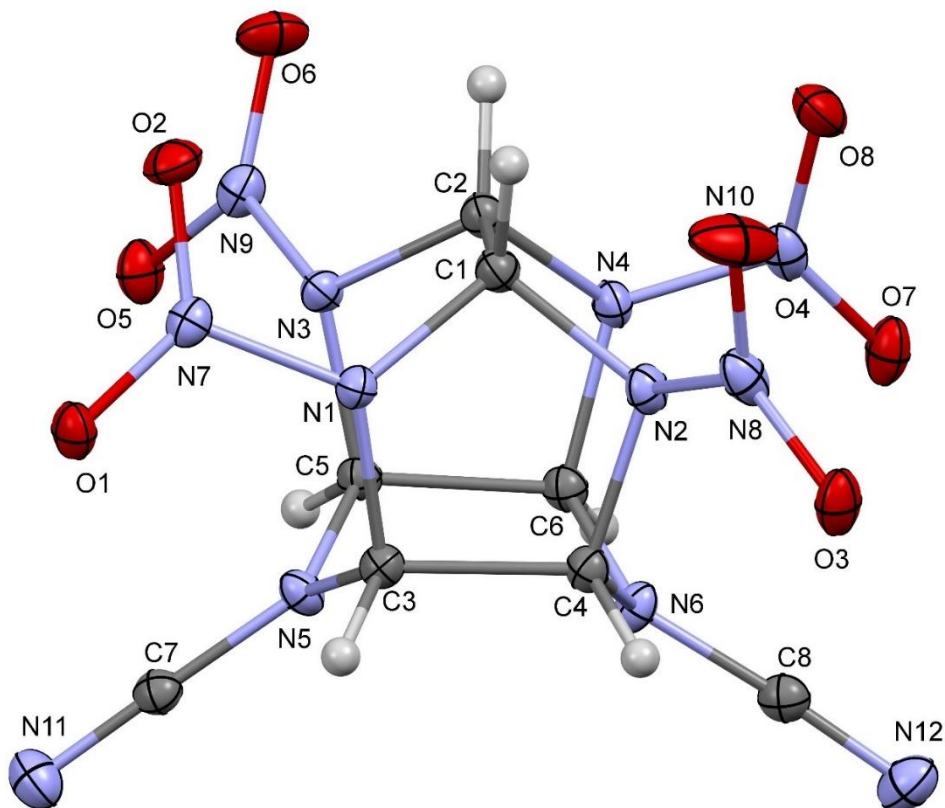

**Figure 7.** General view of molecule **23** in crystal. Anisotropic displacement parameters are drawn at 50% probability level.

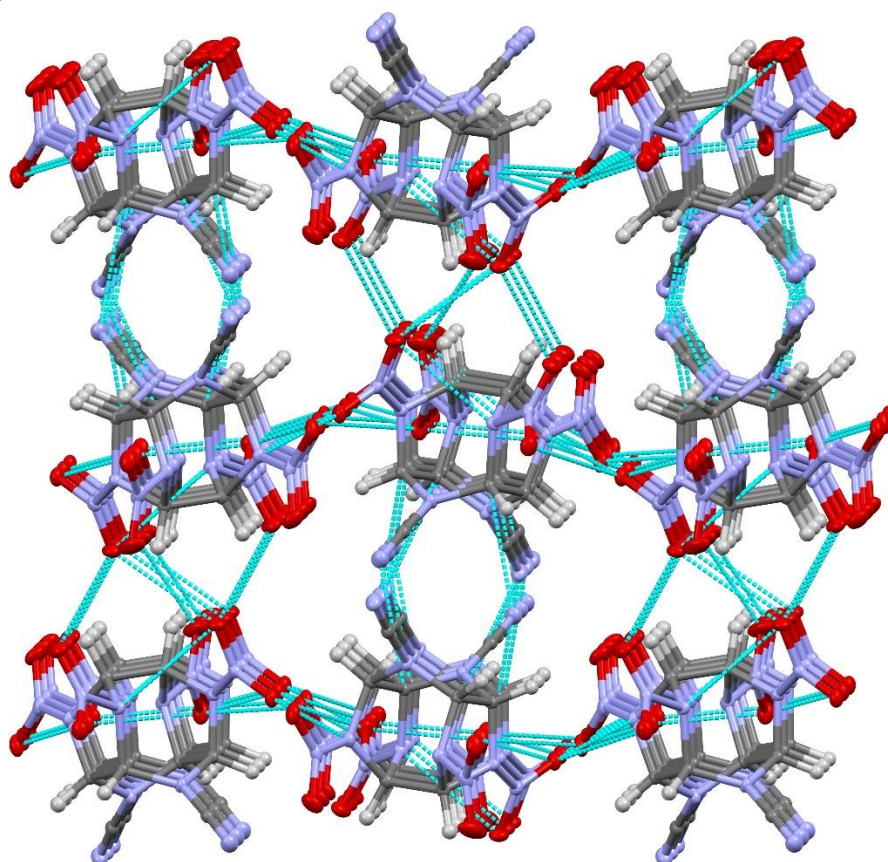

**Figure 8.** General view to the crystal packing for compound **23** along the axis *a*, formed by the O...O interactions and C...N interactions between acetonitrile fragments.

**Table 14.** Selected bond lengths (Å), bond angles (°) and torsion angles (°) of compound **23**

| <b>Bond lengths</b>                        |  |             |
|--------------------------------------------|--|-------------|
| <i>Cage nitro groups</i>                   |  |             |
| N(1)–N(7)                                  |  | 1.3742(13)  |
| N(2)–N(8)                                  |  | 1.4245(13)  |
| N(3)–N(9)                                  |  | 1.4311(13)  |
| N(4)–N(10)                                 |  | 1.3682(13)  |
| <i>Cyano groups</i>                        |  |             |
| N(5)–C(7)                                  |  | 1.3388(15)  |
| N(11)–C(7)                                 |  | 1.1506(16)  |
| N(6)–C(8)                                  |  | 1.3440(15)  |
| N(12)–C(8)                                 |  | 1.1506(16)  |
| <b>Bond angles</b>                         |  |             |
| <i>Cage nitro groups</i>                   |  |             |
| N(7)–N(1)–C(1)                             |  | 119.97(9)   |
| N(7)–N(1)–C(3)                             |  | 120.33(9)   |
| N(8)–N(2)–C(1)                             |  | 116.71(9)   |
| N(8)–N(2)–C(4)                             |  | 115.06(9)   |
| N(9)–N(3)–C(2)                             |  | 115.07(9)   |
| N(9)–N(3)–C(5)                             |  | 114.25(9)   |
| N(10)–N(4)–C(2)                            |  | 121.15(9)   |
| N(10)–N(4)–C(6)                            |  | 120.59(9)   |
| <i>Cyano groups</i>                        |  |             |
| C(7)–N(5)–C(3)                             |  | 121.52(10)  |
| C(7)–N(5)–C(5)                             |  | 120.39(10)  |
| C(8)–N(6)–C(4)                             |  | 118.34(9)   |
| C(8)–N(6)–C(6)                             |  | 120.65(9)   |
| <b>Torsion angles</b>                      |  |             |
| <i>Cage nitro groups</i>                   |  |             |
| N(7)–N(1)–C(3)–C(4) ( <i>equatorial</i> )  |  | 175.29(9)   |
| N(8)–N(2)–C(4)–C(3) ( <i>axial</i> )       |  | 112.11(10)  |
| N(9)–N(3)–C(5)–C(6) ( <i>axial</i> )       |  | 108.43(10)  |
| N(10)–N(4)–C(6)–C(5) ( <i>equatorial</i> ) |  | 178.57(9)   |
| <i>Cyano groups</i>                        |  |             |
| C(7)–N(5)–C(3)–(C4) ( <i>middle</i> )      |  | 140.69(10)  |
| C(7)–N(5)–C(5)–C(6) ( <i>middle</i> )      |  | -137.80(10) |
| C(8)–N(6)–C(4)–C(3) ( <i>middle</i> )      |  | -147.62(10) |
| C(8)–N(6)–C(6)–C(5) ( <i>middle</i> )      |  | 151.06(10)  |

Molecular surface electrostatic potentials (ESPs) of 0.001 electrons per bohr<sup>3</sup> isosurfaces for **5**, **15**, **22**, **23** and **CL-20** calculated for optimized molecular structures in the gas phase using the DFT/B3LYP method at the 6-31G(d,p) level

−15 kcal·mol<sup>−1</sup>

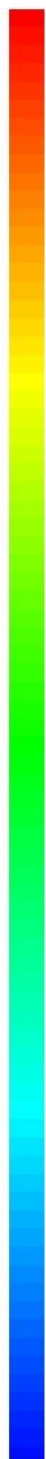

+40 kcal·mol<sup>−1</sup>

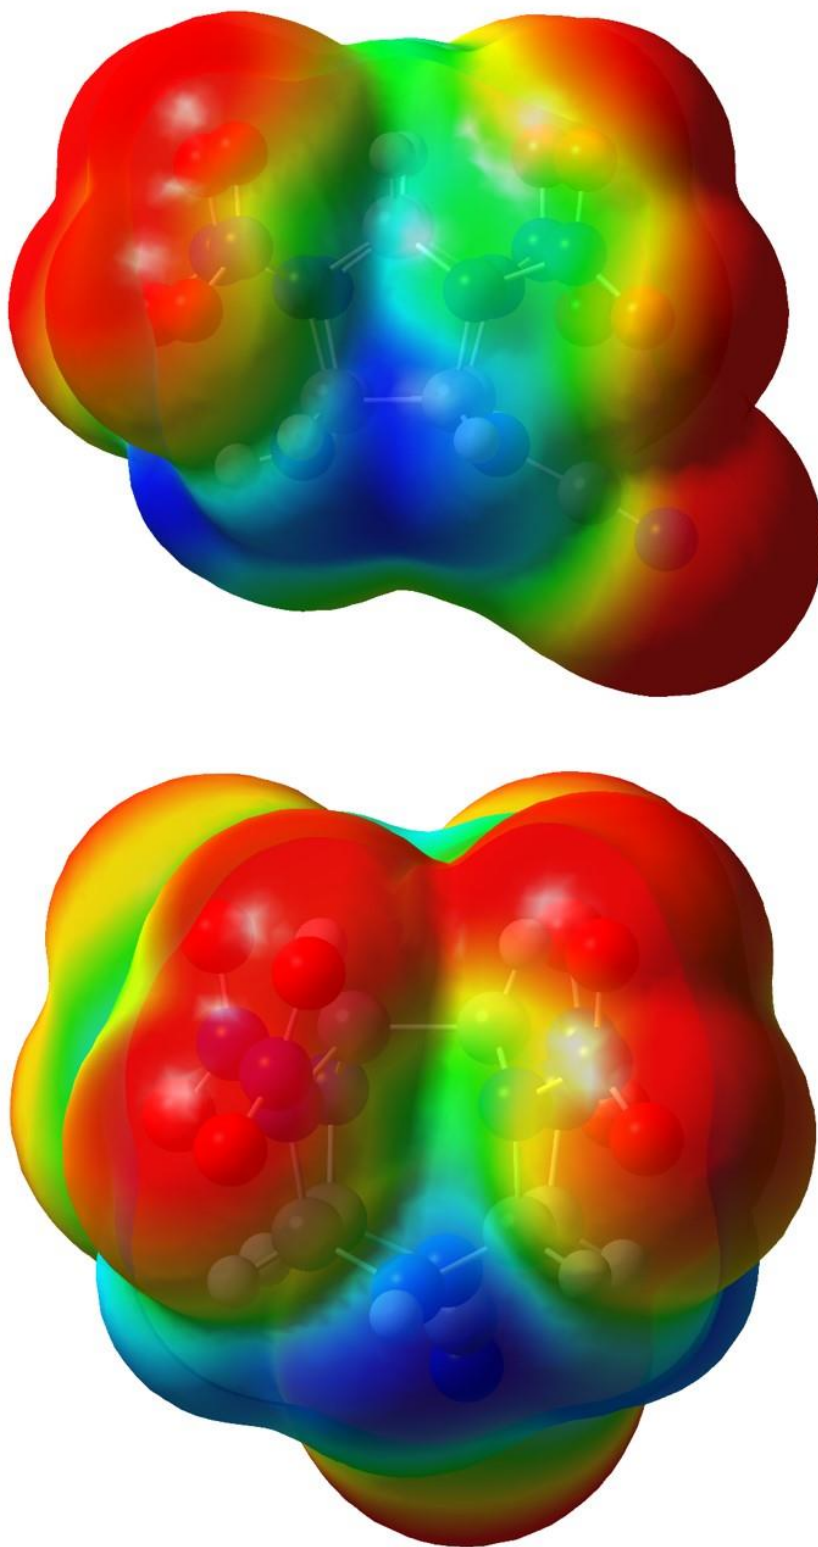

**Figure 9.** Molecular surface electrostatic potentials (ESPs) for **5**. The ESP surface is divided into local electron-deficient (blue) and electron-rich (red) areas.

-15 kcal·mol<sup>-1</sup>

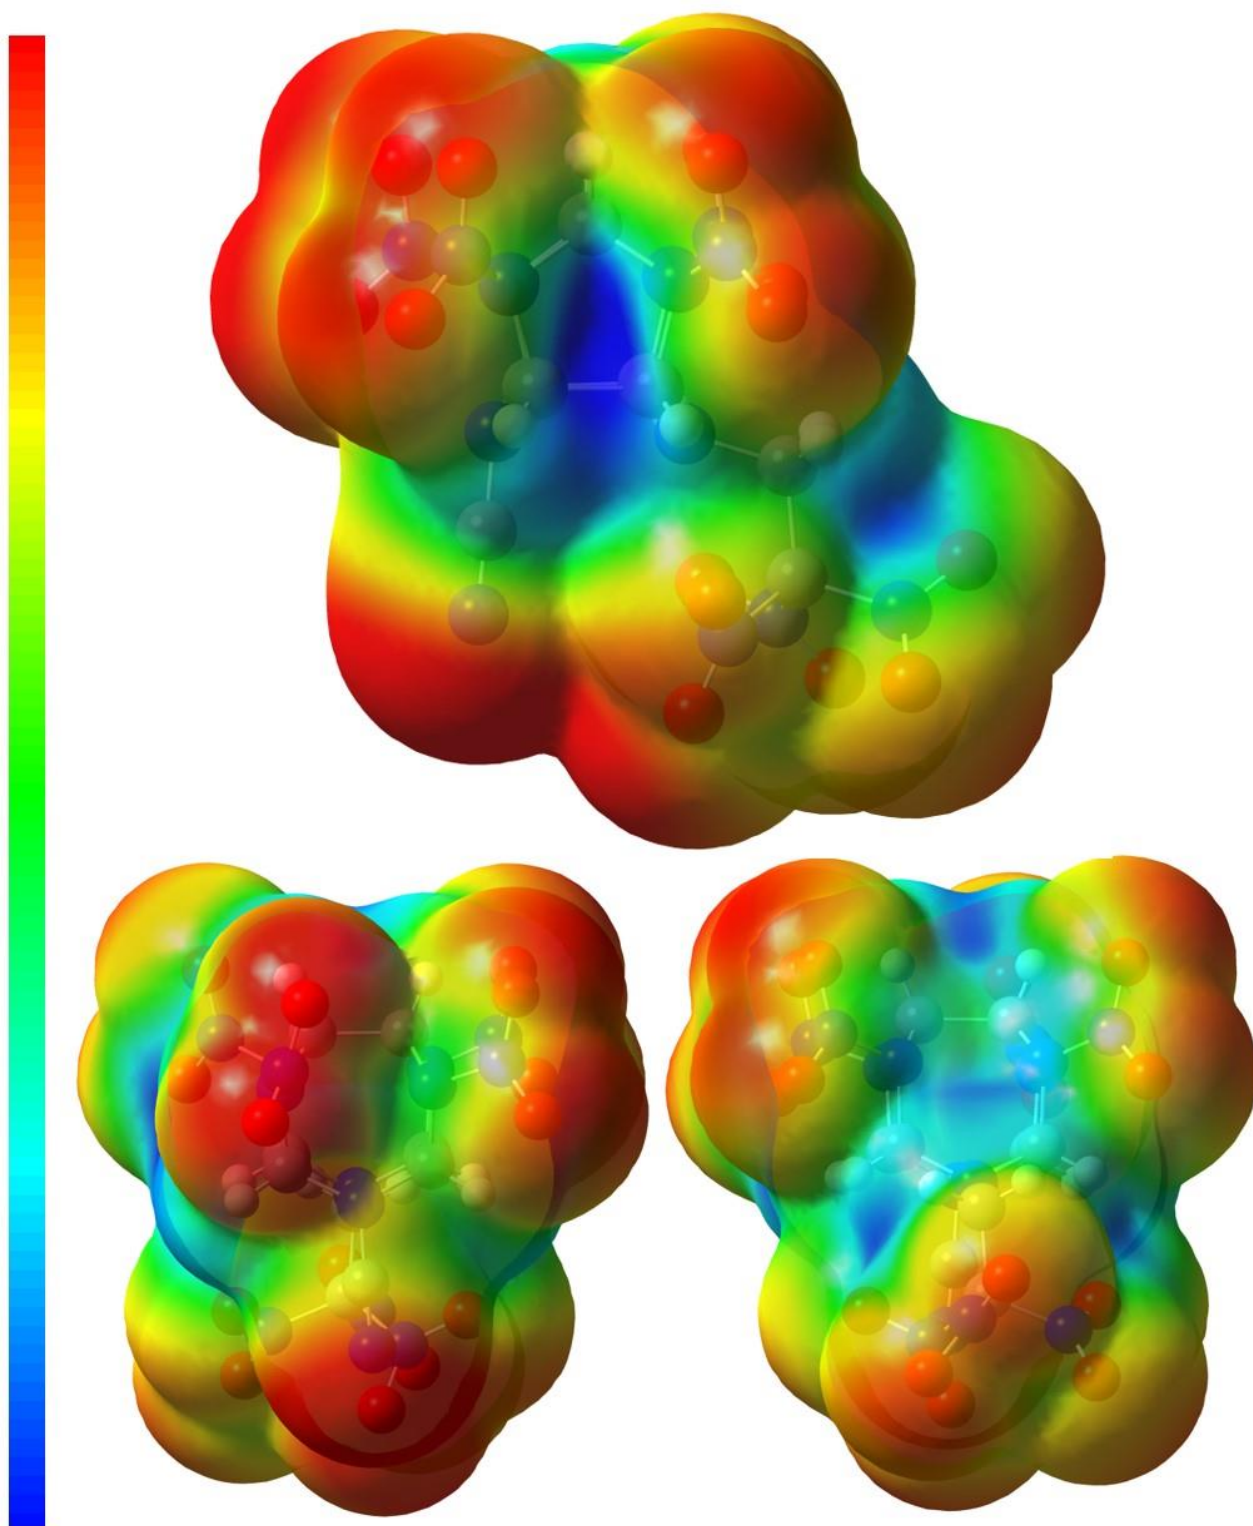

+40 kcal·mol<sup>-1</sup>

**Figure 10.** Molecular surface electrostatic potentials (ESPs) for **15**. The ESP surface is divided into local electron-deficient (blue) and electron-rich (red) areas.

$-15 \text{ kcal}\cdot\text{mol}^{-1}$

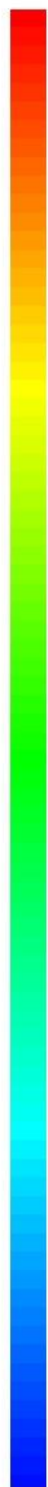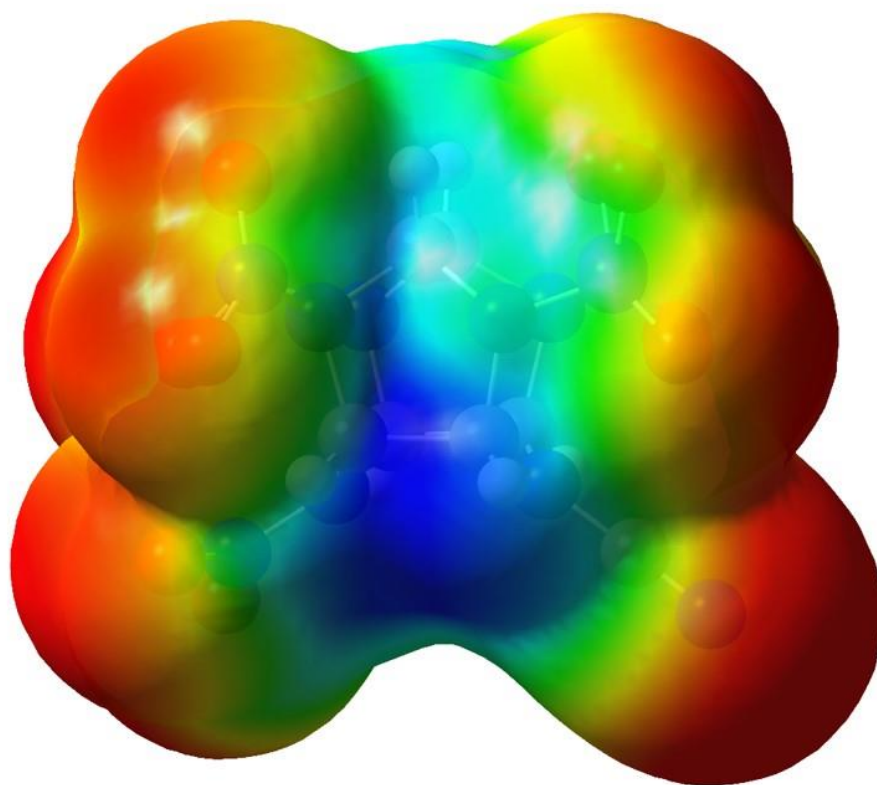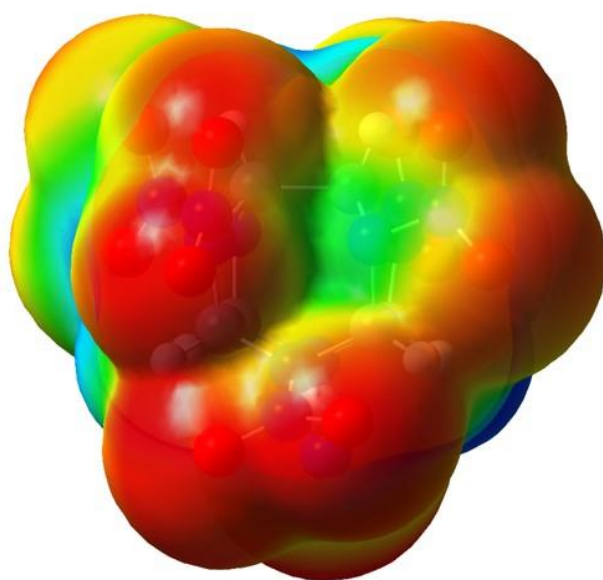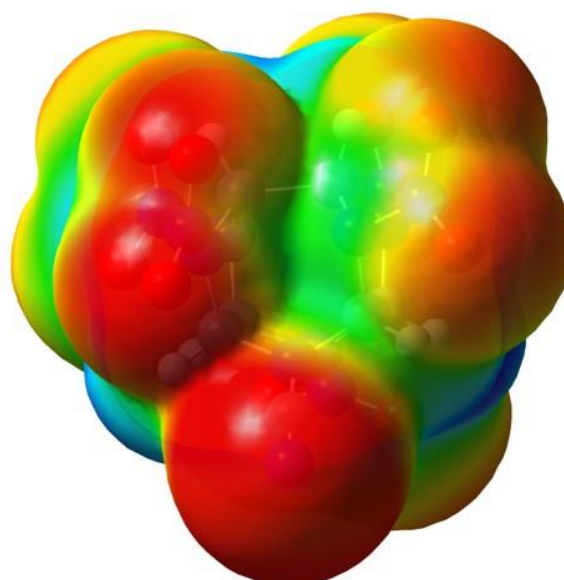

$+40 \text{ kcal}\cdot\text{mol}^{-1}$

**Figure 11.** Molecular surface electrostatic potentials (ESPs) for **22**. The ESP surface is divided into local electron-deficient (blue) and electron-rich (red) areas.

-15 kcal·mol<sup>-1</sup>

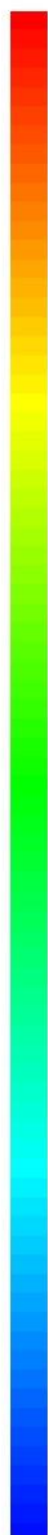

+40 kcal·mol<sup>-1</sup>

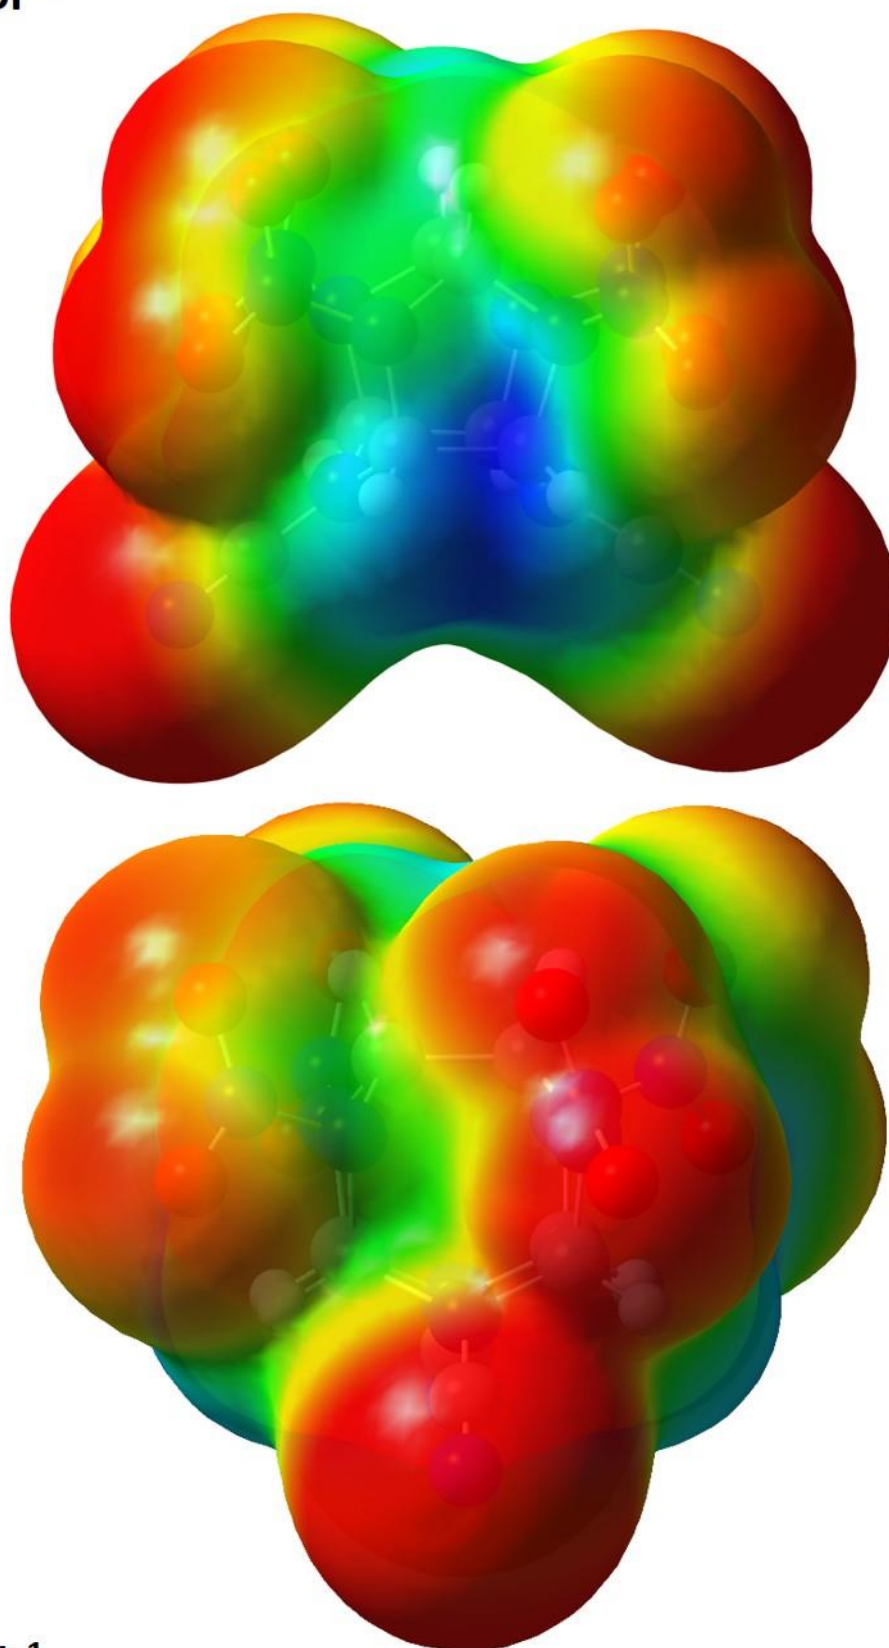

**Figure 12.** Molecular surface electrostatic potentials (ESPs) for **23**. The ESP surface is divided into local electron-deficient (blue) and electron-rich (red) areas.

$-15 \text{ kcal}\cdot\text{mol}^{-1}$

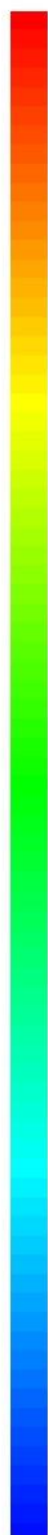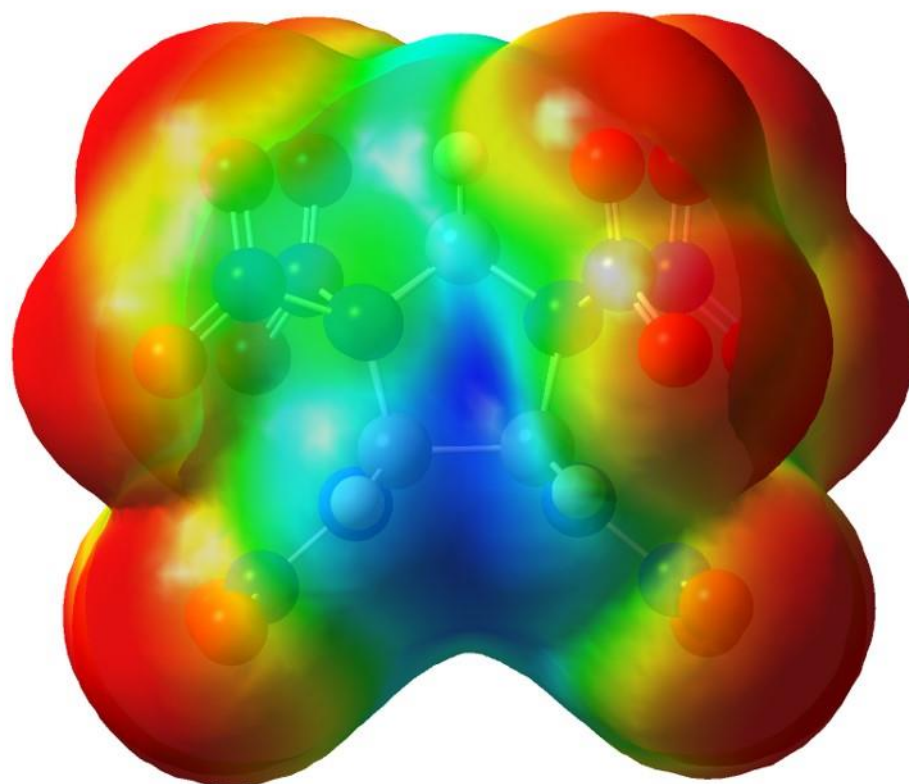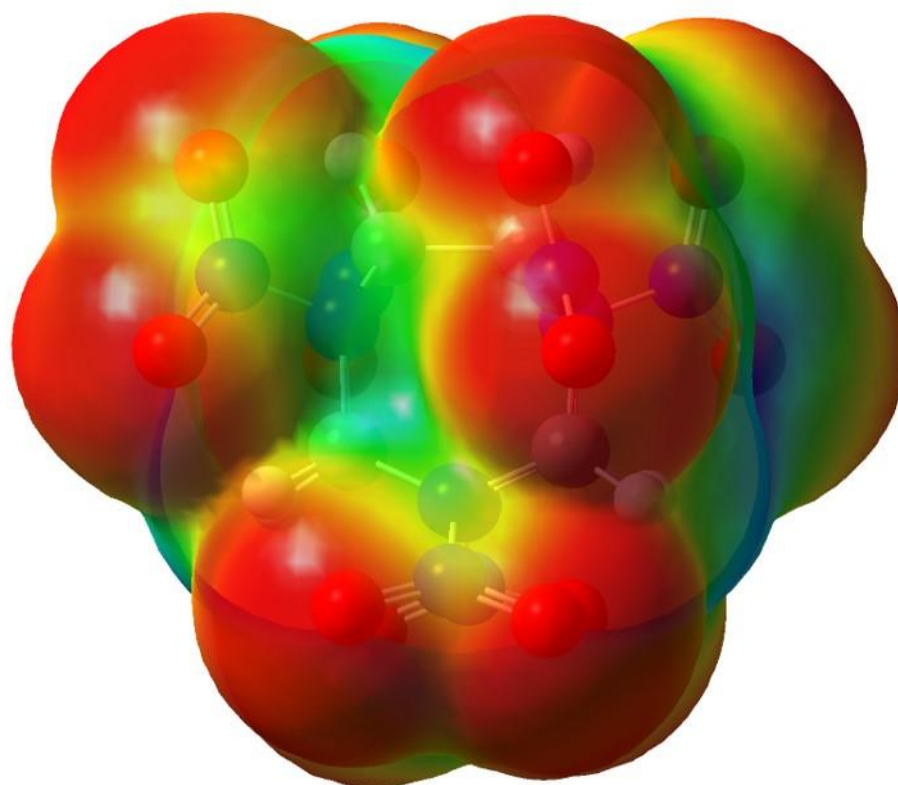

$+40 \text{ kcal}\cdot\text{mol}^{-1}$

**Figure 13.** Molecular surface electrostatic potentials (ESPs) for **CL-20**. The ESP surface is divided into local electron-deficient (blue) and electron-rich (red) areas.

## Differential scanning calorimetric (DSC) and thermogravimetric (TG) analysis for cyano derivatives of polynitro HAIWs 5, 6, 15, 22 and 23

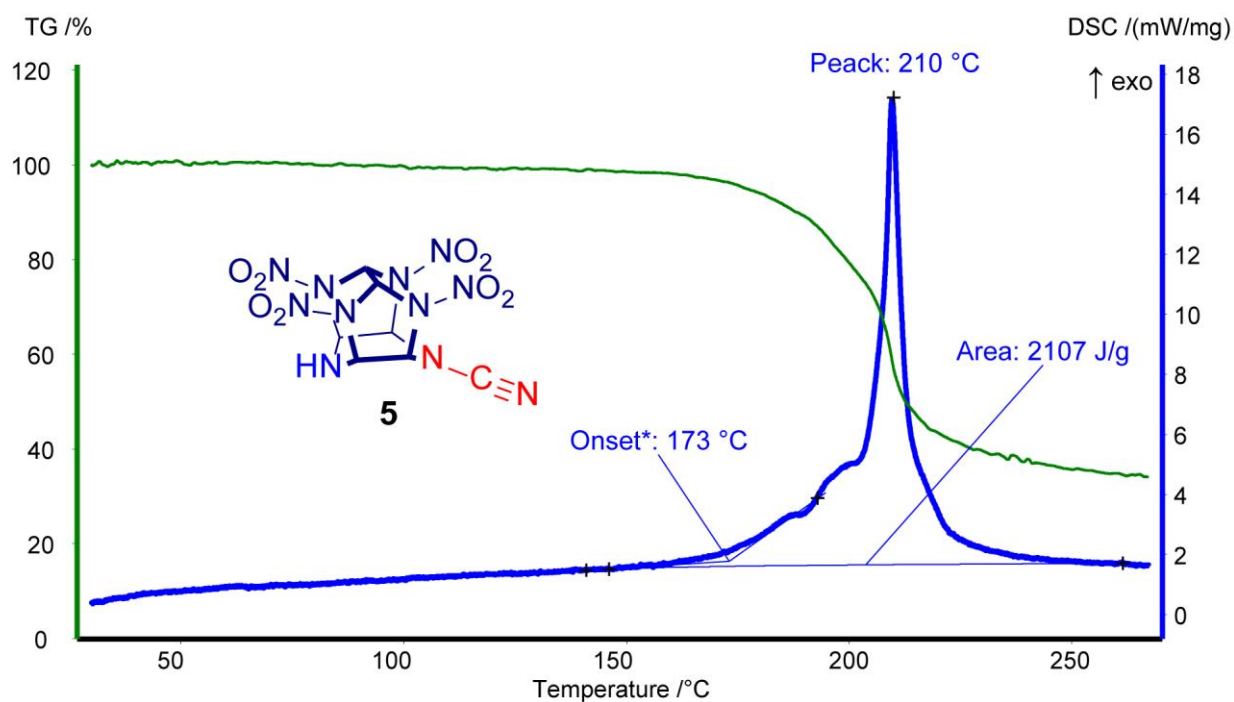

**Figure 14.** DSC and TG curves of amino derivative **5** (heating rate of 5 °C min<sup>-1</sup>).

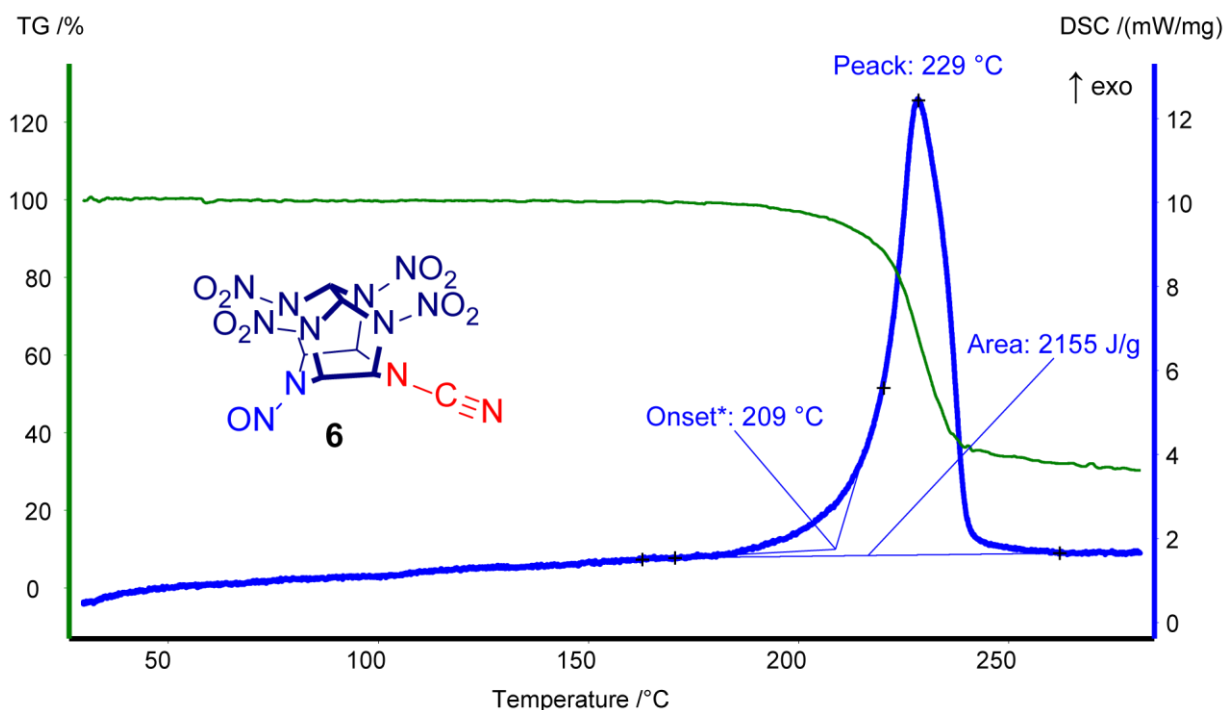

**Figure 15.** DSC and TG curves of nitroso derivative **6** (heating rate of 5 °C min<sup>-1</sup>).

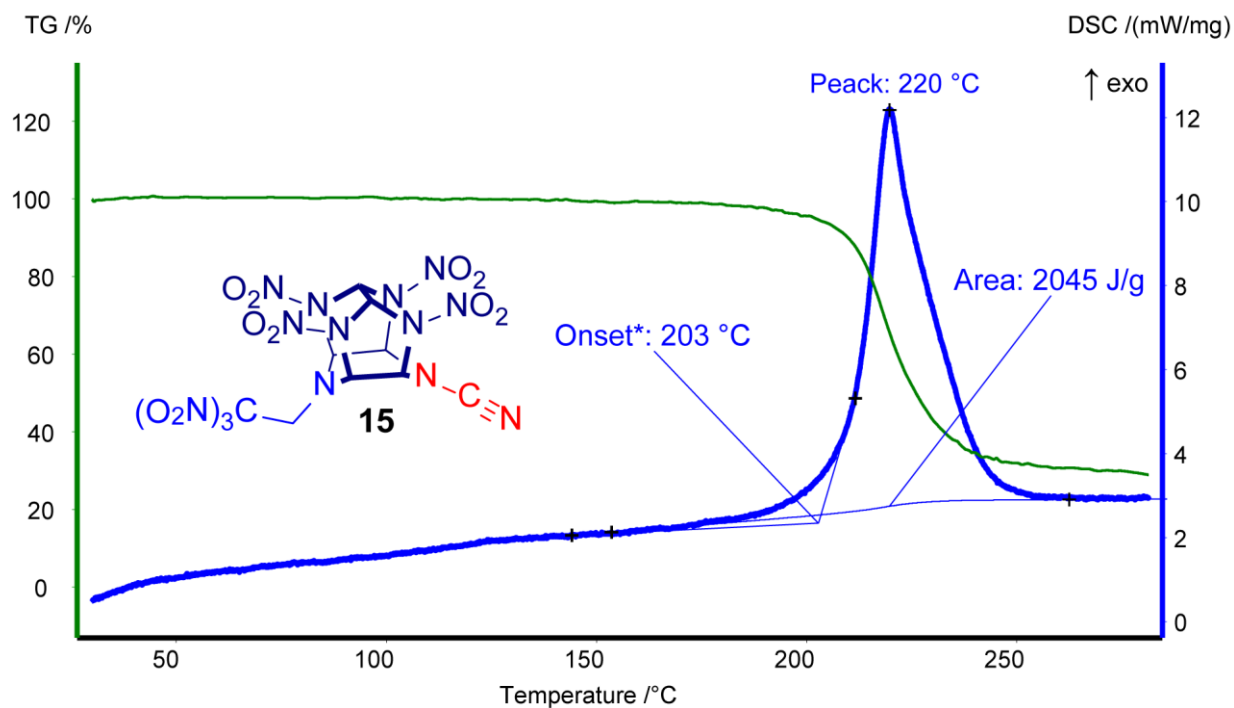

**Figure 16.** DSC and TG curves of 2,2,2-trinitroethyl derivative **15** (heating rate of 5 °C min<sup>-1</sup>).

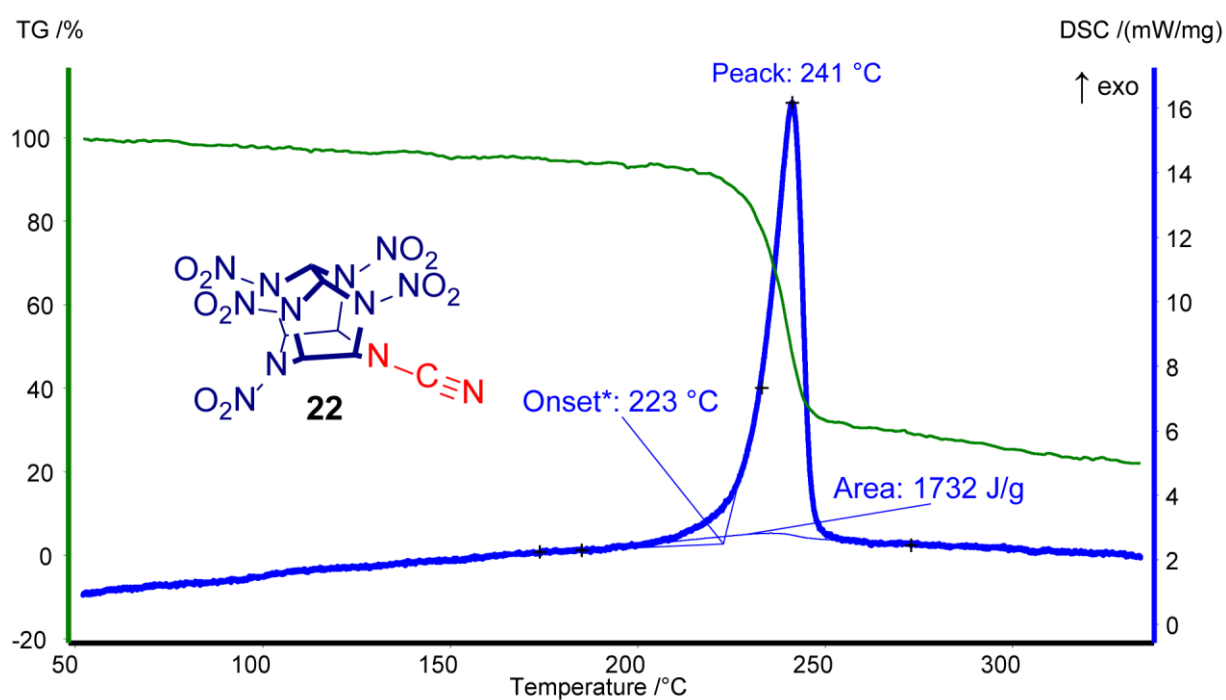

**Figure 17.** DSC and TG curves of pentanitro HAIW **22** (heating rate of 5 °C min<sup>-1</sup>).

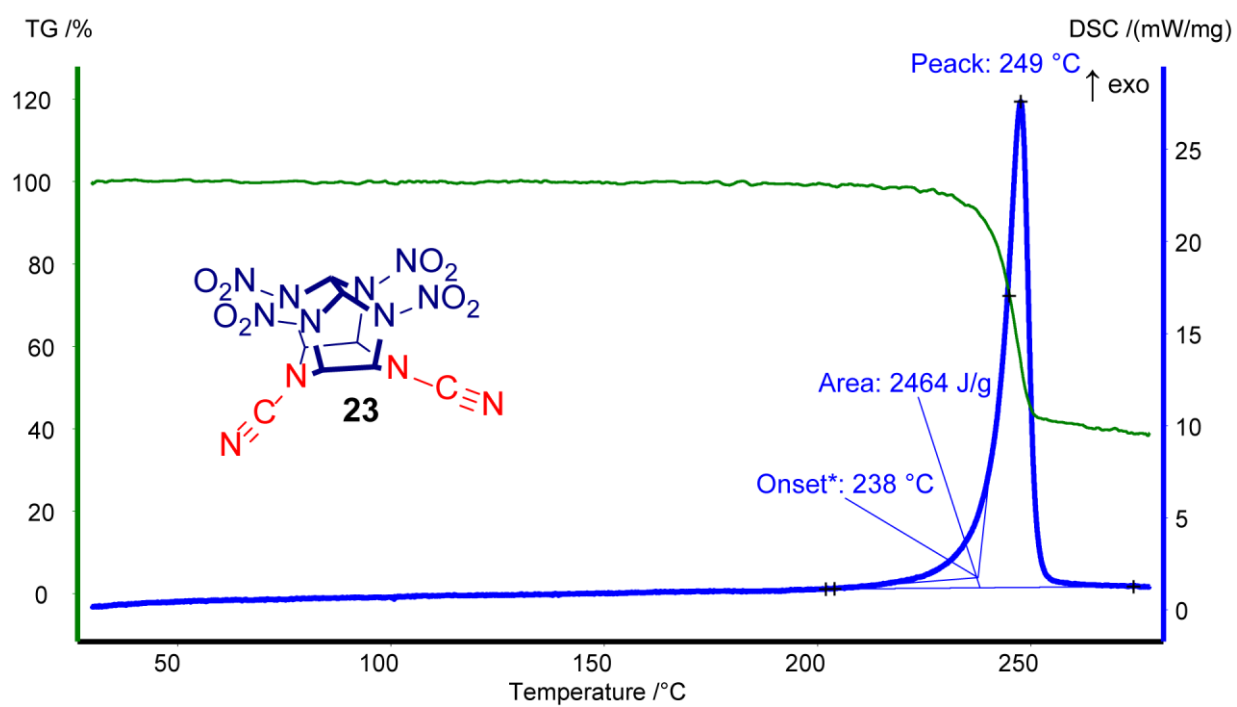

**Figure 18.** DSC and TG curves of dicyano derivative **23** (heating rate of 5 °C min<sup>-1</sup>).

## Measurements and calculations of enthalpies of combustion and formation for cyano-substituted HAIWs **5**, **6**, **15**, **22**, **23**

The combustion reactions of bis-cage derivatives **5**, **6**, **15**, **22** and **23** occurs according to Eq. (1) – Eq. (5)

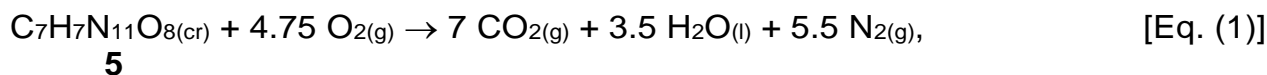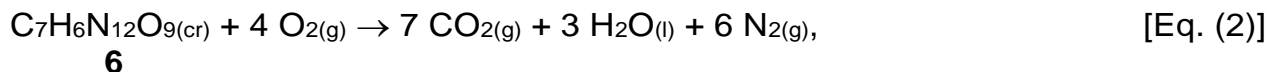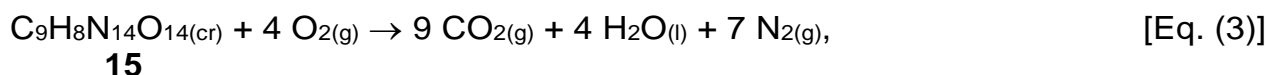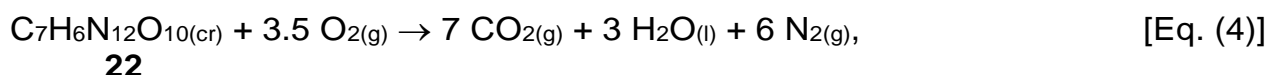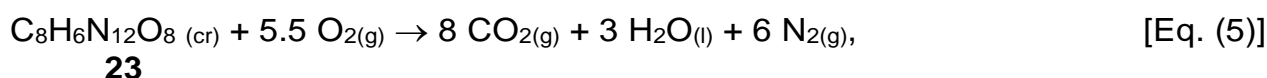

where the subscripts cr, g, and l refer to crystalline, gaseous, and liquid states of the compounds, respectively.

The relationship between the enthalpies of formation and enthalpies of combustion of these compounds are presented by Eq. (6) – Eq. (10) taking into account the stoichiometry of reactions (1) – (5)

$$\Delta H_f [\text{C}_7\text{H}_7\text{N}_{11}\text{O}_8]_{(\text{cr})} = 7 \Delta H_f [\text{CO}_2]_{(\text{g})} + 3.5 \Delta H_f [\text{H}_2\text{O}]_{(\text{l})} - \Delta H_{\text{comb}}(\mathbf{5}), \quad [\text{Eq. (6)}]$$

**5**

$$\Delta H_f [\text{C}_7\text{H}_6\text{N}_{12}\text{O}_9]_{(\text{cr})} = 7 \Delta H_f [\text{CO}_2]_{(\text{g})} + 3 \Delta H_f [\text{H}_2\text{O}]_{(\text{l})} - \Delta H_{\text{comb}}(\mathbf{10}), \quad [\text{Eq. (7)}]$$

**6**

$$\Delta H_f [\text{C}_9\text{H}_8\text{N}_{14}\text{O}_{14}]_{(\text{cr})} = 9 \Delta H_f [\text{CO}_2]_{(\text{g})} + 4 \Delta H_f [\text{H}_2\text{O}]_{(\text{l})} - \Delta H_{\text{comb}}(\mathbf{15}), \quad [\text{Eq. (8)}]$$

**15**

$$\Delta H_f [\text{C}_7\text{H}_6\text{N}_{12}\text{O}_{10}]_{(\text{cr})} = 7 \Delta H_f [\text{CO}_2]_{(\text{g})} + 3 \Delta H_f [\text{H}_2\text{O}]_{(\text{l})} - \Delta H_{\text{com}}(\mathbf{22}), \quad [\text{Eq. (9)}]$$

**22**

$$\Delta H_f [\text{C}_8\text{H}_6\text{N}_{12}\text{O}_8]_{(\text{cr})} = 8 \Delta H_f [\text{CO}_2]_{(\text{g})} + 3 \Delta H_f [\text{H}_2\text{O}]_{(\text{l})} - \Delta H_{\text{comb}}(\mathbf{23}), \quad [\text{Eq. (10)}]$$

**23**

where  $\Delta H_f[\text{CO}_2]_{(\text{g})} = -94.051 \pm 0.031 \text{ kcal} \cdot \text{mol}^{-1}$  and  $\Delta H_f[\text{H}_2\text{O}]_{(\text{l})} = -68.315 \pm 0.009 \text{ kcal} \cdot \text{mol}^{-1}$ .<sup>37</sup>

Measurements of the enthalpies of combustion for **22** and **23** were carried out on a precision automatic combustion calorimeter with an isothermal coating specifically developed for combustion of energetic compounds and are presented in Tables 15 and 16. The mean square error of the measurements was 0.025%.

**Table 15.** Measurements of combustion energy of compound **22**.

| #                                                                               | m <sup>a</sup><br>[g] | ΔT <sup>b</sup><br>[deg] | Q <sub>meas</sub> <sup>c</sup><br>[cal] | q <sub>a</sub> <sup>d</sup><br>[cal] | q <sub>i</sub> <sup>e</sup><br>[cal] | q <sub>N</sub> <sup>f</sup><br>[cal] | q <sub>cot</sub> <sup>g</sup><br>[cal] | -ΔU' <sub>B</sub> <sup>h</sup><br>[cal·g <sup>-1</sup> ] |
|---------------------------------------------------------------------------------|-----------------------|--------------------------|-----------------------------------------|--------------------------------------|--------------------------------------|--------------------------------------|----------------------------------------|----------------------------------------------------------|
| 1                                                                               | 0.058363              | 2.12627                  | 1143.17                                 | 984.01                               | 7.32                                 | 1.31                                 | 9.66                                   | 2413.6                                                   |
| 2                                                                               | 0.080126              | 2.17049                  | 1166.94                                 | 954.87                               | 7.24                                 | 1.80                                 | 9.52                                   | 2415.1                                                   |
| 3                                                                               | 0.079681              | 2.15514                  | 1158.69                                 | 947.55                               | 7.28                                 | 1.80                                 | 9.40                                   | 2417.9                                                   |
| 4                                                                               | 0.078429              | 2.13695                  | 1148.91                                 | 941.47                               | 7.30                                 | 1.75                                 | 9.28                                   | 2411.2                                                   |
| 5                                                                               | 0.081207              | 2.15929                  | 1160.92                                 | 946.01                               | 7.26                                 | 1.93                                 | 9.47                                   | 2416.7                                                   |
| $-\Delta U'_B{}^h = 2414.9 \pm 3.0 \text{ cal}\cdot\text{g}^{-1}$               |                       |                          |                                         |                                      |                                      |                                      |                                        |                                                          |
| $-\Delta H_{\text{comb}}{}^i = 1002.7 \pm 1.3 \text{ kcal}\cdot\text{mol}^{-1}$ |                       |                          |                                         |                                      |                                      |                                      |                                        |                                                          |
| $\Delta H_f{}^j = 139.4 \pm 1.3 \text{ kcal}\cdot\text{mol}^{-1}$               |                       |                          |                                         |                                      |                                      |                                      |                                        |                                                          |

**Table 16.** Measurements of combustion energy of compound **23**.

| #                                                                               | m <sup>a</sup><br>[g] | ΔT <sup>b</sup><br>[deg] | Q <sub>meas</sub> <sup>c</sup><br>[cal] | q <sub>a</sub> <sup>d</sup><br>[cal] | q <sub>i</sub> <sup>e</sup><br>[cal] | q <sub>N</sub> <sup>f</sup><br>[cal] | q <sub>cot</sub> <sup>g</sup><br>[cal] | -ΔU' <sub>B</sub> <sup>h</sup><br>[cal·g <sup>-1</sup> ] |
|---------------------------------------------------------------------------------|-----------------------|--------------------------|-----------------------------------------|--------------------------------------|--------------------------------------|--------------------------------------|----------------------------------------|----------------------------------------------------------|
| 1                                                                               | 0.047206              | 2.01840                  | 1085.17                                 | 930.50                               | 7.20                                 | 1.35                                 | 9.53                                   | 2893.5                                                   |
| 2                                                                               | 0.074831              | 2.16654                  | 1164.82                                 | 929.64                               | 7.31                                 | 2.16                                 | 9.30                                   | 2892.0                                                   |
| 3                                                                               | 0.073209              | 2.12884                  | 1144.55                                 | 913.77                               | 7.28                                 | 2.11                                 | 9.35                                   | 2896.4                                                   |
| 4                                                                               | 0.075014              | 2.17738                  | 1170.66                                 | 934.82                               | 7.30                                 | 2.16                                 | 9.41                                   | 2892.2                                                   |
| 5                                                                               | 0.078312              | 2.21650                  | 1191.68                                 | 946.07                               | 7.18                                 | 2.24                                 | 9.55                                   | 2894.1                                                   |
| $-\Delta U'_B{}^h = 2893.6 \pm 2.1 \text{ cal}\cdot\text{g}^{-1}$               |                       |                          |                                         |                                      |                                      |                                      |                                        |                                                          |
| $-\Delta H_{\text{comb}}{}^i = 1145.6 \pm 0.8 \text{ kcal}\cdot\text{mol}^{-1}$ |                       |                          |                                         |                                      |                                      |                                      |                                        |                                                          |
| $\Delta H_f{}^j = 188.2 \pm 0.8 \text{ kcal}\cdot\text{mol}^{-1}$               |                       |                          |                                         |                                      |                                      |                                      |                                        |                                                          |

**Note for the tables:** <sup>a</sup> Sample mass of the test substance (measurement error 2·10<sup>-6</sup> g); <sup>b</sup> Corrected temperature rise in the calorimeter; <sup>c</sup> The amount of heat measured in experiment (see formula 1); <sup>d</sup> Heat release from the combustion of the auxiliary substance (benzoic acid, the value on a unit of mass 6322.6 ± 1.2 cal·g<sup>-1</sup>); <sup>e</sup> Ignition energy; <sup>f</sup> Heat release from the nitric acid solution formation (the value on a unit of mass 1.38 cal·g<sup>-1</sup>); <sup>g</sup> Heat release from the combustion of cotton thread (the value on a unit of mass measured in a series of seven experiments was 3968.9 ± 1.6 cal·g<sup>-1</sup>); <sup>h</sup> Combustion energy of compound in a bomb is; <sup>i</sup> The standard enthalpy of combustion of the compound; <sup>j</sup> The standard enthalpy of formation of a compound.

The measured values were used to determine  $\Delta H_f^\circ$  of compounds **22** and **23** according to the standard scheme developed by S. M. Skuratov and V. P. Kolesov (M. V. Lomonosov Moscow State University).<sup>38</sup>

The amount of heat measured in experiment is obtained by the formula (1):

$$Q_{\text{meas}} = W \times \Delta T, \quad (1)$$

where  $W$  is the energy equivalent, which was measured in a series of six experiments and amounted to  $537.59 \pm 0.14 \text{ cal} \cdot \text{deg}^{-1}$ .

The combustion energy of compound in a bomb is:

$$-\Delta U_B = (Q_{\text{meas}} - q_a - q_i - q_N - q_{\text{cot}}) \times m^{-1}. \quad (2)$$

And the enthalpy of combustion of the compound is:

$$-\Delta H_{\text{comb}} = -\Delta U_B \times M + \pi \times \Delta U_B + (n - n') \times R \times T, \quad (3)$$

where  $M$  is the molar mass of the test substance,  $n'$  and  $n$  are the number of moles of gases, respectively, in the right and left sides of the chemical equation of combustion of one mole of a substance,  $R$  is the molar gas constant,  $T$  is the standard temperature (298 K) and  $\pi$  is the Washburn correction, which for compound  $C_aH_bO_cN_d$  is calculated by the formula:

$$\pi = 0.3 \times P \times (-\Delta U_B / a)^{-1} \times \left[ -1 + 1.1 \times \left( \frac{b - 2(c + d)}{4a} \right) - \frac{2}{P} \right] \quad (4),$$

where  $P$  is the initial pressure of oxygen in the bomb (30 atm);  $-\Delta U_B / a$  is the heat of combustion of carbon contained in a combusted compound,  $\text{kcal} \cdot (\text{g} \cdot \text{atom})^{-1}$ .

Based on these thermochemical and literature data,<sup>[8b–g]</sup> the determination of  $\Delta H_{\text{comb}}$  and  $\Delta H_f^\circ$  for **5**, **6** and **15** was carried out by the additive method for calculating thermodynamic properties to S. W. Benson<sup>19</sup> using the contributions of molecular fragments as well as Eq. (6) – Eq. (8), respectively.

## High-temperature chemical equilibria thermodynamic calculations for cyano-substituted HAIWs 5, 6, 15, 22, 23

Metal-free formulations of SCP with an “active” binder, a mixture of polyvinyl methyl tetrazole with nitroglycerin and a phlegmatizer (Act-bnd,  $C_{18.96}H_{34.64}N_{19.16}O_{29.32}$ ;  $\Delta H_F -757$   $\text{kJ}\cdot\text{kg}^{-1}$ ;  $d$   $1.49$   $\text{g}\cdot\text{cm}^{-3}$ )<sup>24</sup> in an amount corresponding to 19% by volume and the rest is a mixture of AP with the material under study (CL-20 or **5**, **6**, **15**, **22** and **23**) by varying the ratio of these HEDMs to AP were considered. The specific impulse  $I_{sp}$  (at pressures of 4.0 and 0.1 MPa in the combustion chamber and at the nozzle exit, respectively) and the combustion temperature  $T_{comb}$  were determined using the standard code TERRA<sup>26</sup> for high-temperature chemical equilibria calculation. The results of calculation with varying of the content of the organic energetic component are presented in Table 17 and Figures 19, 20.

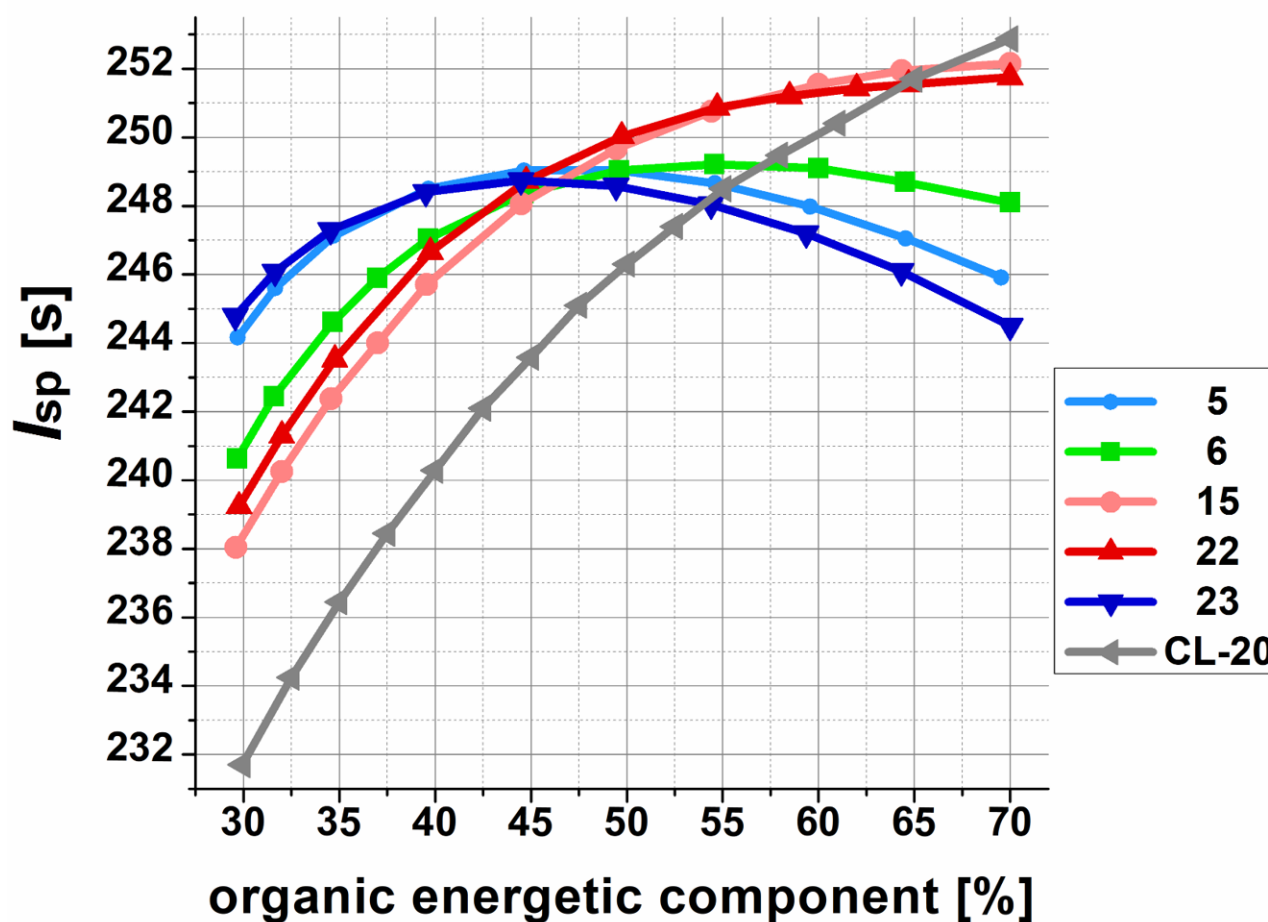

**Figure 19.** The dependence of  $I_{sp}$  on the kind of HEDM (**5**, **6**, **15**, **22**, **23** and CL-20) and its percentage in the SCP formulations containing 19 vol% (15–16 wt%) Active binder, organic energetic component, and AP.

**Table 17.** The  $I_{sp}$  values and other energetic parameters that can be achieved using SCP containing 19 vol% (15.0–15.8 wt%) Active binder, 34.4–39.8 wt% AP and HEDM **5**, **6**, **15**, **22**, **23** or CL-20.

| organic component |       | Act-bnd <sup>a</sup><br>[wt%] | AP <sup>b</sup><br>[wt%] | $d^c$<br>[g·cm <sup>-3</sup> ] | $T_{comb}^d$<br>[K] | $I_{sp}^e$<br>[s] |
|-------------------|-------|-------------------------------|--------------------------|--------------------------------|---------------------|-------------------|
| type              | [wt%] |                               |                          |                                |                     |                   |
| <b>5</b>          | 15.48 | 10                            | 74.52                    | 1.828                          | 3100                | 244.6             |
|                   | 15.46 | 15                            | 69.54                    | 1.831                          | 3160                | 245.9             |
|                   | 15.44 | 20                            | 64.56                    | 1.833                          | 3200                | 247.1             |
|                   | 15.42 | 25                            | 59.58                    | 1.835                          | 3240                | 248.0             |
|                   | 15.4  | 30                            | 54.6                     | 1.837                          | 3260                | 248.7             |
|                   | 15.38 | 35                            | 49.62                    | 1.840                          | 3265                | 249.0             |
|                   | 15.36 | 40                            | 44.64                    | 1.842                          | 3260                | 249.0             |
|                   | 15.34 | 45                            | 39.66                    | 1.844                          | 3240                | 248.5             |
|                   | 15.32 | 50                            | 34.68                    | 1.847                          | 3210                | 247.1             |
| <b>6</b>          | 15.3  | 55                            | 29.7                     | 1.849                          | 3160                | 244.2             |
|                   | 15.5  | 10                            | 74.5                     | 1.827                          | 3260                | 247.3             |
|                   | 15.46 | 20                            | 64.54                    | 1.831                          | 3300                | 248.7             |
|                   | 15.42 | 30                            | 54.58                    | 1.836                          | 3300                | 249.2             |
|                   | 15.4  | 35                            | 49.6                     | 1.839                          | 3290                | 249.0             |
|                   | 15.38 | 40                            | 44.62                    | 1.841                          | 3260                | 248.4             |
|                   | 15.36 | 45                            | 39.64                    | 1.843                          | 3230                | 247.0             |
|                   | 15.34 | 50                            | 34.66                    | 1.846                          | 3190                | 244.6             |
|                   | 15.32 | 55                            | 29.68                    | 1.848                          | 3120                | 240.6             |
| <b>15</b>         | 15.75 | 0                             | 84.25                    | 1.798                          | 3370                | 251.9             |
|                   | 15.7  | 10                            | 74.3                     | 1.805                          | 3370                | 252.2             |
|                   | 15.65 | 20                            | 64.35                    | 1.813                          | 3360                | 251.9             |
|                   | 15.58 | 30                            | 54.42                    | 1.820                          | 3320                | 250.8             |
|                   | 15.55 | 35                            | 49.45                    | 1.824                          | 3290                | 249.7             |
|                   | 15.5  | 40                            | 44.5                     | 1.828                          | 3260                | 248.1             |
|                   | 15.45 | 45                            | 39.55                    | 1.832                          | 3215                | 245.7             |
|                   | 15.42 | 50                            | 34.58                    | 1.835                          | 3160                | 242.4             |
|                   | 15.4  | 55                            | 29.6                     | 1.839                          | 3090                | 238.0             |
| <b>22</b>         | 15.3  | 10                            | 74.7                     | 1.848                          | 3360                | 251.3             |
|                   | 15.29 | 20                            | 64.71                    | 1.850                          | 3355                | 251.6             |
|                   | 15.28 | 30                            | 54.72                    | 1.852                          | 3330                | 250.9             |
|                   | 15.27 | 35                            | 49.73                    | 1.853                          | 3300                | 250.0             |
|                   | 15.26 | 40                            | 44.74                    | 1.854                          | 3270                | 248.7             |
|                   | 15.25 | 45                            | 39.75                    | 1.855                          | 3230                | 246.7             |
|                   | 15.24 | 50                            | 34.76                    | 1.856                          | 3180                | 243.5             |
|                   | 15.23 | 55                            | 29.77                    | 1.857                          | 3110                | 239.2             |
| <b>23</b>         | 15.76 | 10                            | 74.24                    | 1.798                          | 3120                | 243.2             |
|                   | 15.68 | 20                            | 64.32                    | 1.806                          | 3220                | 246.1             |
|                   | 15.64 | 25                            | 59.36                    | 1.811                          | 3250                | 247.2             |
|                   | 15.6  | 30                            | 54.4                     | 1.815                          | 3270                | 248.0             |
|                   | 15.56 | 35                            | 49.44                    | 1.819                          | 3285                | 248.6             |
|                   | 15.52 | 40                            | 44.48                    | 1.823                          | 3280                | 248.7             |
|                   | 15.48 | 45                            | 39.52                    | 1.828                          | 3260                | 248.4             |
|                   | 15.44 | 50                            | 34.56                    | 1.832                          | 3230                | 247.3             |
|                   | 15.42 | 55                            | 29.58                    | 1.836                          | 3180                | 244.8             |
| <b>CL-20</b>      | 14.8  | 10                            | 75.2                     | 1.912                          | 3400                | 253.8             |
|                   | 14.85 | 15                            | 70.15                    | 1.908                          | 3380                | 252.9             |
|                   | 14.9  | 20                            | 65.1                     | 1.905                          | 3350                | 251.7             |
|                   | 14.9  | 25                            | 60.1                     | 1.902                          | 3320                | 250.2             |
|                   | 14.95 | 30                            | 55.05                    | 1.898                          | 3280                | 248.5             |
|                   | 14.95 | 35.05                         | 50                       | 1.895                          | 3240                | 246.2             |
|                   | 15    | 40                            | 45                       | 1.891                          | 3200                | 243.6             |
|                   | 15    | 45                            | 40                       | 1.888                          | 3140                | 240.3             |
|                   | 15.05 | 55                            | 29.95                    | 1.882                          | 3000                | 231.7             |

<sup>a</sup> Active binder. <sup>b</sup> Ammonium perchlorate. <sup>c</sup> Density of composition. <sup>d</sup> Temperature in the combustion chamber. <sup>e</sup> Specific impulse

(A)

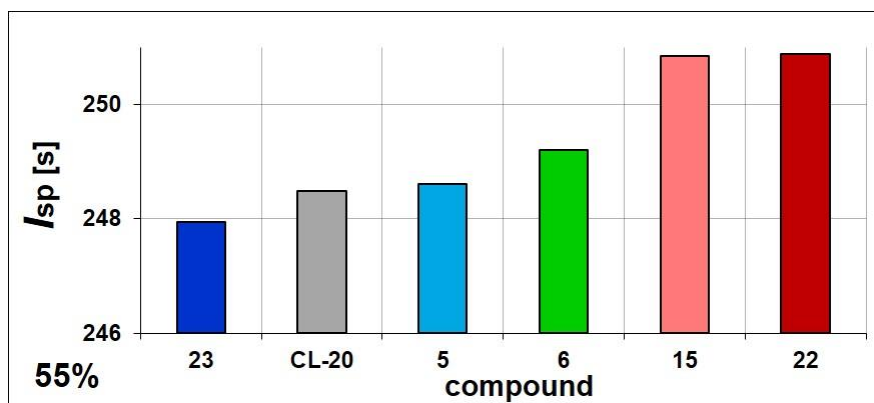

(B)

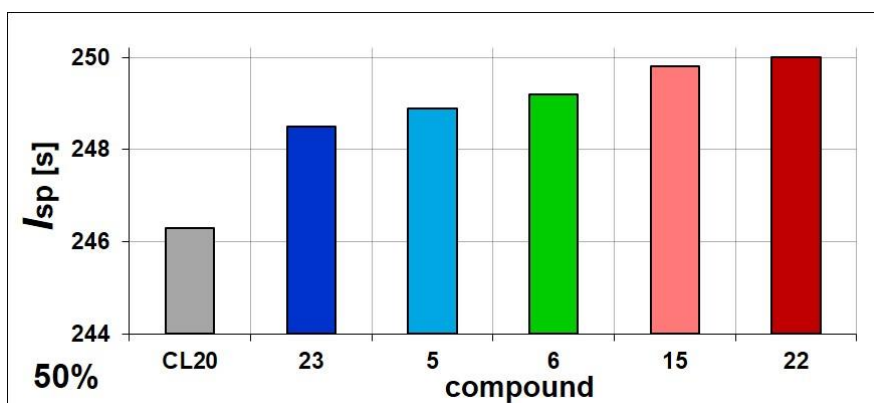

(C)

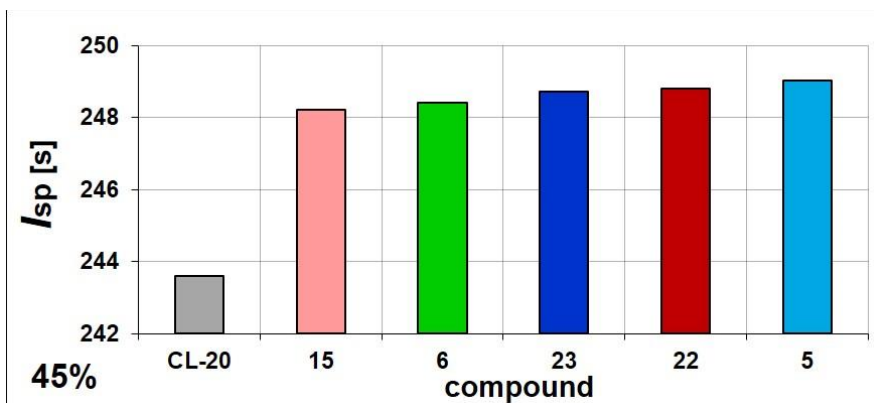

(D)

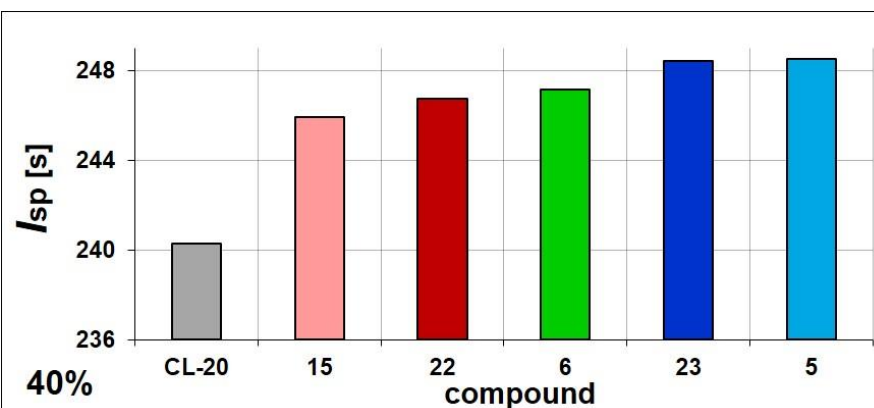

**Figure 20.** A series of the relative efficiency of the studied energetic components at the maximum  $I_{sp}$  values of the SCP compositions containing 19 vol% Active binder, AP, and HEDM 5, 6, 15, 22, 23 or CL-20 at 55 (A), 50 (B), 45 (C) and 40 (D) wt%.

## Explosive performance of compounds 5, 6, 15, 22 and 23

**Table 18.** Physicochemical and explosive properties of **5**, **6**, **15**, **22** and **23** in comparison with RDX, HMX, and CL-20 (all density measured using a gas pycnometer at room temperature).

| Compd     | Formula                                                       | $\alpha^a$ | H% <sup>b</sup> | $T_{\text{dec}}^c$<br>[°C] | $d^d$<br>[g cm <sup>-3</sup> ] | $\Delta H_f^e$<br>[kJ/kg (kJ mol <sup>-1</sup> )] | IS <sup>f</sup><br>[J] | FS <sup>f</sup><br>[N] | $D_v^g$<br>[km s <sup>-1</sup> ] | $P_{C-J}^g$<br>[GPa] | $Q_v^g$<br>[MJ kg <sup>-1</sup> ] |
|-----------|---------------------------------------------------------------|------------|-----------------|----------------------------|--------------------------------|---------------------------------------------------|------------------------|------------------------|----------------------------------|----------------------|-----------------------------------|
| <b>5</b>  | C <sub>7</sub> H <sub>7</sub> N <sub>11</sub> O <sub>8</sub>  | 0.46       | 1.89            | 173                        | 1.902                          | +1590 (+593)                                      | –                      | –                      | 9.14                             | 39.2                 | 6.22                              |
| <b>6</b>  | C <sub>7</sub> H <sub>6</sub> N <sub>12</sub> O <sub>9</sub>  | 0.53       | 1.50            | 209                        | 1.899                          | +1479 (+594)                                      | –                      | –                      | 9.06                             | 38.8                 | 6.21                              |
| <b>15</b> | C <sub>9</sub> H <sub>8</sub> N <sub>14</sub> O <sub>14</sub> | 0.64       | 1.50            | 203                        | 1.868                          | +1035 (+555)                                      | –                      | –                      | 8.96                             | 37.4                 | 6.47                              |
| <b>22</b> | C <sub>7</sub> H <sub>6</sub> N <sub>12</sub> O <sub>10</sub> | 0.59       | 1.45            | 223                        | 1.924                          | +1397 (+584)                                      | 3.9                    | 220                    | 9.19                             | 40.9                 | 6.44                              |
| <b>23</b> | C <sub>8</sub> H <sub>6</sub> N <sub>12</sub> O <sub>8</sub>  | 0.42       | 1.52            | 238                        | 1.858                          | +1980 (+788)                                      | 5.2                    | 210                    | 8.95                             | 36.7                 | 6.30                              |
| RDX       | C <sub>3</sub> H <sub>6</sub> N <sub>6</sub> O <sub>6</sub>   | 0.67       | 2.72            | 204 <sup>h</sup>           | 1.799                          | +301 (+67) <sup>i</sup>                           | 8.0 <sup>h</sup>       | 130 <sup>h</sup>       | 8.96                             | 36.2                 | 6.17                              |
| HMX       | C <sub>4</sub> H <sub>8</sub> N <sub>8</sub> O <sub>8</sub>   | 0.67       | 2.70            | 280 <sup>h</sup>           | 1.897                          | +255 (+76) <sup>i</sup>                           | 7.0 <sup>h</sup>       | 130 <sup>h</sup>       | 9.21                             | 40.3                 | 6.15                              |
| CL-20     | C <sub>6</sub> H <sub>6</sub> N <sub>12</sub> O <sub>12</sub> | 0.80       | 1.37            | 229 <sup>h</sup>           | 2.021                          | +857 (+375) <sup>j</sup>                          | 4.0 <sup>h</sup>       | 80 <sup>h</sup>        | 9.43                             | 45.6                 | 6.53                              |

<sup>a</sup> Oxygen coefficient. For a compound with the molecular formula C<sub>x</sub>H<sub>y</sub>N<sub>w</sub>O<sub>z</sub>,  $\alpha = z/(2x+y/2)$ . <sup>b</sup> Hydrogen content. <sup>c</sup> Extrapolated decomposition onset temperature at a heating rate of 5 °C min<sup>-1</sup> (DSC). <sup>d</sup> Density measured using a gas pycnometer at room temperature.

<sup>e</sup> Standard enthalpy of formation determined by the method of combustion calorimetry. <sup>f</sup> The impact and friction sensitivity determined by BAM method using the STANAG standards.<sup>22</sup> <sup>g</sup> Detonation parameters: velocity, pressure and heat calculated with S&DV4.5 code.<sup>23</sup>

<sup>h</sup> Ref.21 <sup>i</sup> Ref.21 <sup>j</sup> Ref.8d

## References

- 27 (a) K. Karaghiosoff, T. M. Klapötke, P. Mayer, H. Piotrowski, K. Polborn, R. L. Willer and J. J. Weigand, *J. Org. Chem.*, 2006, **71**, 1295–1305; (b) A. R. Farminer and G. A. Webb, *Tetrahedron*, 1975, **31**, 1521–1526; (c) H. Bandmann, P. Heymanns, C. Siem and P. Rademacher, *Angew. Chem.*, 1984, **96**, 354–355; (d) T. Lenz, T.M. Klapötke, M. Mühlemann and J. Stierstorfer, *Propellants Explos. Pyrotech.*, 2021, **46**, 723–73; (e) D. M. Kanjia, J. Mason, I. A. Stenhouse, R. E. Banks and N. D. Venayak, *J. Chem. Soc. Perkin Trans. 2*, 1981, 975–979.
- 28 (a) E. Pretsch, P. Bühlmann and M. Badertscher, *Structure determination of organic compounds, tables of spectral data*, fourth ed., Springer-Verlag, Berlin, Heidelberg, 2009; (b) G. Socrates, *Infrared and raman characteristic group frequencies: Tables and charts*, third ed., John Wiley & Sons, Chichester, 2004.
- 29 V. V. Kachala, L. L. Khemchyan, A. S. Kashin, N. V. Orlov, A. A. Grachev, S. S. Zaleskiy and V. P. Ananikov, *Russ. Chem. Rev.*, 2013, **82**, 648.
- 30 M. C. Pirrung, *The synthetic organic chemist's companion*, John Wiley & Sons, New Jersey, 2007.
- 31 A. J. Speziale and L. R. Smith, *J. Org. Chem.*, 1962, **27**, 3742–3743.
- 32 CrysAlisPro Version 1.171.41.106a, Rigaku Oxford Diffraction, 2021.
- 33 G. M. Sheldrick, *Acta Crystallogr. Sect. A*, 2015, **71**, 3–8.
- 34 G. M. Sheldrick, *Acta Crystallogr. Sect. C*, 2015, **71**, 3–8.
- 35 O. V. Dolomanov, L. J. Bourhis, R. J. Gildea, J. A. K. Howard and H. Puschmann, *J. Appl. Cryst.*, 2009, **42**, 339–341.
- 36 C. F. Macrae, I. Sovago, S. J. Cottrell, P. T. A. Galek, P. McCabe, E. Pidcock, M. Platings, G. P. Shields, J. S. Stevens, M. Towler and P. A. Wood, *J. Appl. Cryst.*, 2020, **53**, 226–235.
- 37 J. D. Cox, D. D. Wagman and V. A. Medvedev, *CODATA key values for thermodynamics*, Hemisphere Publ. Corp., New York, 1989.
- 38 a) S. M. Skuratov, V. P. Kolesov and A. F. Vorobiev, *Thermochemistry*, Moscow University, Moscow, 1966, b) D. R. Stull, E. F. Westrum and G. C. Sinke, *Chemical thermodynamics of organic compounds*, John Wiley & Sons, New York, 1969.
- 39 (a) R. Meyer, J. Kohler and A. Homburg, *Explosives*, Wiley-VCH, Weinheim, 7<sup>th</sup> edn, 2016; (b) *Energy Condensed Systems. A Concise Encyclopedic Dictionary*, ed. B. P. Zhukov, Yanus-K, Moscow, 2<sup>nd</sup> edn, 2000.
